# Supplementary material for: THE FAM53C/DYRK1A axis regulates the G1/S transition of the cell cycle
Source: eLife journal article supplement (doi:10.7554/elife.109708), 2025-12-11

23 May 2024

SS

DYRK1A

\*

FAM53C

GAPDH

FAM RFP  
RFP RFP

SAMPLES (R2)

DYRK1A (R) 1:200  
FAM (R) 1:250  
GAPDH (R) 1:3000

↑ west  
↓ west

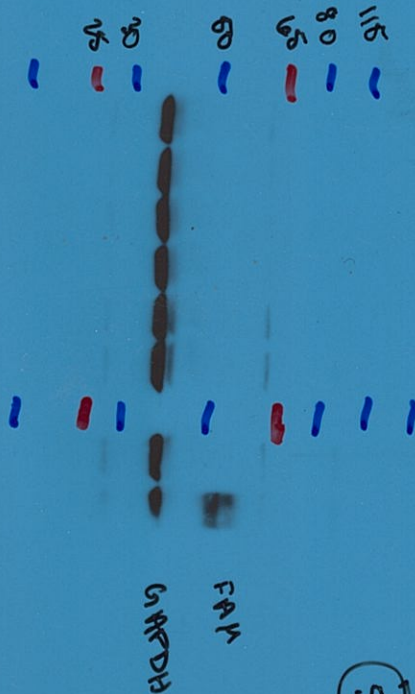

23 MAY 2024

511  
80  
5  
505  
51  
50

511 80 5 505 51 50

511

2m

511 80 5 505 51 50

23 May 2024

1:3000 GAPDH (R)  
1:1000 HA (R)  
1:1000 FLAG (M)

→ 2° @ 1:5000

54

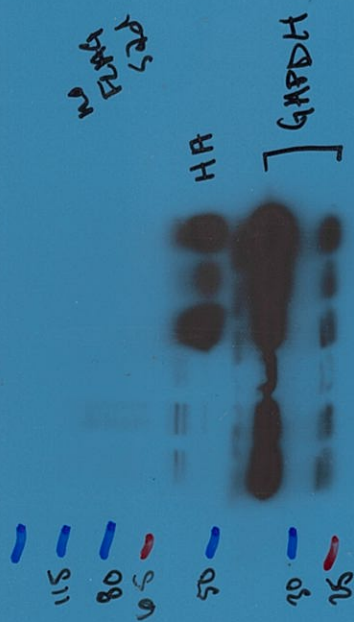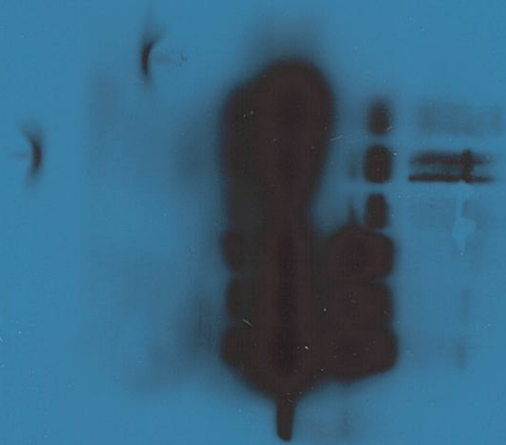

Supplement: fig1-data1 [file Xerox Scan_05282024131028.pdf › Figure 1 - Source data 1/Xerox Scan_05282024131028.pdf]
