# Supplementary material for: The FAM53C/DYRK1A axis regulates the G1/S transition of the cell cycle
Source: eLife. 2026 Apr 30;14:RP109708. doi: 10.7554/eLife.109708 (PMC13132546; doi:10.7554/eLife.109708)
Supplement: Supplementary file 1. [file elife-109708-supp1.xlsx]

## Sheet: Suppl File 1 Read me
Supplementary File 1: 38 genes in the G1 network and co-dependency scores for each
The next tab lists the 38 G1/S genes used in the analysis.
The 38 following tabs show the DepMap correlation data for each of the 38 genes.

## Sheet: 38 genes
Gene	Category	Overlap score
ARID4A	RB binding factor	0
CCNA1	Cyclin/CDK	0
CCNA2	Cyclin/CDK	2
CCND1	Cyclin/CDK	12
CCND2	Cyclin/CDK	2
CCND3	Cyclin/CDK	2
CCNE1	Cyclin/CDK	9
CCNE2	Cyclin/CDK	3
CDK2	Cyclin/CDK	13
CDK4	Cyclin/CDK	5
CDK6	Cyclin/CDK	9
CDKN1A	CDK inhibitor	5
CDKN1B	CDK inhibitor	3
CDKN2A	CDK inhibitor	2
CDKN2B	CDK inhibitor	1
CDKN2C	CDK inhibitor	2
CDKN2D	CDK inhibitor	0
E2F1	E2F transcription factor	3
E2F2	E2F transcription factor	1
E2F3	E2F transcription factor	12
E2F4	E2F transcription factor	3
E2F5	E2F transcription factor	0
E2F6	E2F transcription factor	0
E2F7	E2F transcription factor	6
E2F8	E2F transcription factor	3
KDM5A	RB binding factor	0
KDM5B	RB binding factor	0
RB1	RB family	5
RBBP4	RB binding factor	2
RBBP5	RB binding factor	0
RBBP6	RB binding factor	0
RBBP7	RB binding factor	0
RBBP8	RB binding factor	0
RBBP9	RB binding factor	0
RBL1	RB family	7
RBL2	RB family	4
TFDP1	E2F transcription factor	5
TFDP2	E2F transcription factor	3

## Sheet: ARID4A
Gene/Compound	Dataset	Correlation
MRGBP	CRISPR (Avana) Public 20Q2	-0.246
MORF4L2	CRISPR (Avana) Public 20Q2	0.211
OR10G4	CRISPR (Avana) Public 20Q2	-0.194
H1-4	CRISPR (Avana) Public 20Q2	-0.191
RPLP2	CRISPR (Avana) Public 20Q2	-0.185
MLEC	CRISPR (Avana) Public 20Q2	0.184
UBE2A	CRISPR (Avana) Public 20Q2	0.184
CCDC38	CRISPR (Avana) Public 20Q2	0.18
ING2	CRISPR (Avana) Public 20Q2	0.175
MDM2	CRISPR (Avana) Public 20Q2	-0.175
SUGP1	CRISPR (Avana) Public 20Q2	0.174
TP53	CRISPR (Avana) Public 20Q2	0.174
FBXO33	CRISPR (Avana) Public 20Q2	0.173
ATM	CRISPR (Avana) Public 20Q2	0.173
CNOT7	CRISPR (Avana) Public 20Q2	0.172
TMEM222	CRISPR (Avana) Public 20Q2	-0.169
ACD	CRISPR (Avana) Public 20Q2	-0.169
NMBR	CRISPR (Avana) Public 20Q2	-0.167
TAOK1	CRISPR (Avana) Public 20Q2	0.163
POLH	CRISPR (Avana) Public 20Q2	0.163
CDYL2	CRISPR (Avana) Public 20Q2	-0.161
BRMS1	CRISPR (Avana) Public 20Q2	0.16
AKT1S1	CRISPR (Avana) Public 20Q2	0.159
TEX35	CRISPR (Avana) Public 20Q2	0.159
HSF5	CRISPR (Avana) Public 20Q2	-0.159
EZH2	CRISPR (Avana) Public 20Q2	-0.157
ARHGAP5	CRISPR (Avana) Public 20Q2	0.156
MAML1	CRISPR (Avana) Public 20Q2	-0.156
ACAA2	CRISPR (Avana) Public 20Q2	0.156
MRFAP1	CRISPR (Avana) Public 20Q2	-0.156
KCNF1	CRISPR (Avana) Public 20Q2	-0.156
ELP2	CRISPR (Avana) Public 20Q2	-0.156
USP15	CRISPR (Avana) Public 20Q2	0.155
PAPOLA	CRISPR (Avana) Public 20Q2	-0.155
TSC1	CRISPR (Avana) Public 20Q2	0.154
CSDE1	CRISPR (Avana) Public 20Q2	0.153
PPP4R3A	CRISPR (Avana) Public 20Q2	0.153
C19orf57	CRISPR (Avana) Public 20Q2	0.153
JKAMP	CRISPR (Avana) Public 20Q2	0.153
ACSM4	CRISPR (Avana) Public 20Q2	-0.152
TMC3	CRISPR (Avana) Public 20Q2	-0.152
DDX53	CRISPR (Avana) Public 20Q2	0.152
ZPR1	CRISPR (Avana) Public 20Q2	-0.151
YIPF3	CRISPR (Avana) Public 20Q2	0.15
CARD16	CRISPR (Avana) Public 20Q2	-0.15
ARHGAP21	CRISPR (Avana) Public 20Q2	0.15
FAM169B	CRISPR (Avana) Public 20Q2	-0.15
ABRAXAS2	CRISPR (Avana) Public 20Q2	0.15
MTOR	CRISPR (Avana) Public 20Q2	-0.15
CTU1	CRISPR (Avana) Public 20Q2	-0.149
ZMYND8	CRISPR (Avana) Public 20Q2	-0.149
CEP128	CRISPR (Avana) Public 20Q2	0.149
C10orf67	CRISPR (Avana) Public 20Q2	-0.149
WAC	CRISPR (Avana) Public 20Q2	0.149
DEPDC5	CRISPR (Avana) Public 20Q2	0.148
SNX17	CRISPR (Avana) Public 20Q2	0.148
PABPC4	CRISPR (Avana) Public 20Q2	-0.148
CCDC130	CRISPR (Avana) Public 20Q2	0.148
PCBP2	CRISPR (Avana) Public 20Q2	0.148
TSGA10	CRISPR (Avana) Public 20Q2	0.147
ROR1	CRISPR (Avana) Public 20Q2	-0.147
SAP130	CRISPR (Avana) Public 20Q2	0.147
EEF1D	CRISPR (Avana) Public 20Q2	-0.147
LATS2	CRISPR (Avana) Public 20Q2	0.146
ALKBH1	CRISPR (Avana) Public 20Q2	0.146
NOSIP	CRISPR (Avana) Public 20Q2	0.146
TAS2R3	CRISPR (Avana) Public 20Q2	-0.146
C9	CRISPR (Avana) Public 20Q2	0.146
NOB1	CRISPR (Avana) Public 20Q2	-0.146
RPL14	CRISPR (Avana) Public 20Q2	-0.145
EPB41L2	CRISPR (Avana) Public 20Q2	0.145
CDC25C	CRISPR (Avana) Public 20Q2	0.145
PPP1R8	CRISPR (Avana) Public 20Q2	0.145
JADE1	CRISPR (Avana) Public 20Q2	-0.145
AMBRA1	CRISPR (Avana) Public 20Q2	0.145
SPEN	CRISPR (Avana) Public 20Q2	-0.144
DIP2B	CRISPR (Avana) Public 20Q2	0.144
CCDC198	CRISPR (Avana) Public 20Q2	0.144
CENPE	CRISPR (Avana) Public 20Q2	-0.144
IGF2	CRISPR (Avana) Public 20Q2	-0.144
AMZ2	CRISPR (Avana) Public 20Q2	0.143
XPO7	CRISPR (Avana) Public 20Q2	0.143
NRAS	CRISPR (Avana) Public 20Q2	-0.143
PRELID1	CRISPR (Avana) Public 20Q2	-0.143
NINJ1	CRISPR (Avana) Public 20Q2	0.142
OR5I1	CRISPR (Avana) Public 20Q2	0.142
PDCD2	CRISPR (Avana) Public 20Q2	-0.142
BTG1	CRISPR (Avana) Public 20Q2	0.141
RO60	CRISPR (Avana) Public 20Q2	-0.141
TP53BP1	CRISPR (Avana) Public 20Q2	0.141
SLC37A1	CRISPR (Avana) Public 20Q2	0.14
H1-5	CRISPR (Avana) Public 20Q2	-0.139
ZNF430	CRISPR (Avana) Public 20Q2	0.139
WNT5B	CRISPR (Avana) Public 20Q2	-0.139
ARID4B	CRISPR (Avana) Public 20Q2	0.139
LACC1	CRISPR (Avana) Public 20Q2	0.138
MPHOSPH8	CRISPR (Avana) Public 20Q2	0.138
ZBTB5	CRISPR (Avana) Public 20Q2	0.138
OR2T8	CRISPR (Avana) Public 20Q2	-0.138
FRMD4A	CRISPR (Avana) Public 20Q2	-0.138
PITX1	Expression Public 20Q2	-0.168
S100B	Expression Public 20Q2	0.163
BIK	Expression Public 20Q2	-0.161
TRPM3	Expression Public 20Q2	0.161
EPB41L4B	Expression Public 20Q2	-0.16
LRMDA	Expression Public 20Q2	0.16
LURAP1	Expression Public 20Q2	0.158
OCLN	Expression Public 20Q2	-0.158
ITGB3	Expression Public 20Q2	0.155
ELL3	Expression Public 20Q2	-0.154
ABHD3	Expression Public 20Q2	-0.153
FABP7	Expression Public 20Q2	0.153
PMP2	Expression Public 20Q2	0.152
SFR1	Expression Public 20Q2	-0.151
SYT7	Expression Public 20Q2	-0.15
SHROOM4	Expression Public 20Q2	0.149
EDA2R	Expression Public 20Q2	0.149
CTHRC1	Expression Public 20Q2	0.149
AKAP6	Expression Public 20Q2	0.148
FGD6	Expression Public 20Q2	-0.148
TEX12	Expression Public 20Q2	-0.147
PTCHD4	Expression Public 20Q2	0.147
RLN3	Expression Public 20Q2	-0.147
GAPDHS	Expression Public 20Q2	0.146
SLC24A5	Expression Public 20Q2	0.145
S100A1	Expression Public 20Q2	0.145
EDNRB	Expression Public 20Q2	0.144
LMTK2	Expression Public 20Q2	-0.144
GRTP1	Expression Public 20Q2	-0.143
MOCS1	Expression Public 20Q2	0.143
TDRD3	Expression Public 20Q2	0.142
SCML4	Expression Public 20Q2	0.142
SRD5A1	Expression Public 20Q2	-0.142
C11orf98	Expression Public 20Q2	-0.142
CDCA7L	Expression Public 20Q2	-0.142
NUP37	Expression Public 20Q2	-0.141
MARK2	Expression Public 20Q2	-0.14
TMEM30B	Expression Public 20Q2	-0.139
DSTYK	Expression Public 20Q2	0.138
CCDC6	Expression Public 20Q2	-0.138
ABHD11	Expression Public 20Q2	-0.137
IFI30	Expression Public 20Q2	-0.137
TRIM51	Expression Public 20Q2	0.137
PRSS38	Expression Public 20Q2	0.136
PATL1	Expression Public 20Q2	-0.136
RGS5	Expression Public 20Q2	0.136
JMJD1C	Expression Public 20Q2	-0.136
APOD	Expression Public 20Q2	0.136
BBS5	Expression Public 20Q2	0.135
DCT	Expression Public 20Q2	0.135
RAB3IP	Expression Public 20Q2	-0.135
SH2D3A	Expression Public 20Q2	-0.134
STARD10	Expression Public 20Q2	-0.133
LCK	Expression Public 20Q2	-0.133
ELMO3	Expression Public 20Q2	-0.133
DOCK10	Expression Public 20Q2	0.133
LSR	Expression Public 20Q2	-0.133
TYR	Expression Public 20Q2	0.133
DEDD2	Expression Public 20Q2	-0.133
SPATS1	Expression Public 20Q2	0.133
TBX2	Expression Public 20Q2	0.132
SSR2	Expression Public 20Q2	0.132
ITIH3	Expression Public 20Q2	0.132
SLC35F2	Expression Public 20Q2	-0.132
KRT27	Expression Public 20Q2	0.131
PHACTR1	Expression Public 20Q2	0.131
PLEKHA4	Expression Public 20Q2	0.131
MAP2K1	Expression Public 20Q2	-0.131
ROPN1	Expression Public 20Q2	0.131
CRTAP	Expression Public 20Q2	0.131
CAPN3	Expression Public 20Q2	0.131
PLP1	Expression Public 20Q2	0.131
RXRG	Expression Public 20Q2	0.131
MARVELD3	Expression Public 20Q2	-0.131
SOX10	Expression Public 20Q2	0.13
EGR3	Expression Public 20Q2	0.13
RND1	Expression Public 20Q2	-0.13
SUPT4H1	Expression Public 20Q2	0.13
ADK	Expression Public 20Q2	-0.129
SCEL	Expression Public 20Q2	-0.129
IFNL2	Expression Public 20Q2	-0.129
TEKT5	Expression Public 20Q2	0.129
CLDN7	Expression Public 20Q2	-0.129
TC2N	Expression Public 20Q2	-0.129
SESN1	Expression Public 20Q2	0.129
ATP2C2	Expression Public 20Q2	-0.129
KLHL20	Expression Public 20Q2	0.128
BEX4	Expression Public 20Q2	0.128
ARHGAP31	Expression Public 20Q2	0.128
C1orf210	Expression Public 20Q2	-0.128
STYK1	Expression Public 20Q2	-0.128
CBLC	Expression Public 20Q2	-0.127
DYTN	Expression Public 20Q2	0.127
CD96	Expression Public 20Q2	0.127
RASL10A	Expression Public 20Q2	-0.127
FA2H	Expression Public 20Q2	-0.127
EXPH5	Expression Public 20Q2	-0.127
ATP8B2	Expression Public 20Q2	0.127
ANKFN1	Expression Public 20Q2	0.127
CDC42BPG	Expression Public 20Q2	-0.127
PDC	Copy Number Public 20Q2	0.167
LINC01032	Copy Number Public 20Q2	0.167
TPR	Copy Number Public 20Q2	0.166
ODR4	Copy Number Public 20Q2	0.166
RGS2	Copy Number Public 20Q2	0.166
OCLM	Copy Number Public 20Q2	0.166
RGS18	Copy Number Public 20Q2	0.165
LINC01036	Copy Number Public 20Q2	0.165
UCHL5	Copy Number Public 20Q2	0.165
PRG4	Copy Number Public 20Q2	0.165
RGS13	Copy Number Public 20Q2	0.165
RGS1	Copy Number Public 20Q2	0.165
LINC01037	Copy Number Public 20Q2	0.164
RGS21	Copy Number Public 20Q2	0.163
PLA2G4A	Copy Number Public 20Q2	0.163
PTGS2	Copy Number Public 20Q2	0.163
PACERR	Copy Number Public 20Q2	0.163
KCNT2	Copy Number Public 20Q2	0.162
LINC01724	Copy Number Public 20Q2	0.162
LINC01720	Copy Number Public 20Q2	0.162
LINC01680	Copy Number Public 20Q2	0.162
LINC01351	Copy Number Public 20Q2	0.162
SOAT1	Copy Number Public 20Q2	0.162
LINC01031	Copy Number Public 20Q2	0.162
ABL2	Copy Number Public 20Q2	0.162
TOR3A	Copy Number Public 20Q2	0.162
FAM20B	Copy Number Public 20Q2	0.161
LAMC2	Copy Number Public 20Q2	0.161
LAMC1-AS1	Copy Number Public 20Q2	0.16
B3GALT2	Copy Number Public 20Q2	0.16
MIR1278	Copy Number Public 20Q2	0.16
CDC73	Copy Number Public 20Q2	0.16
BRINP3	Copy Number Public 20Q2	0.16
GLRX2	Copy Number Public 20Q2	0.16
SCARNA18B	Copy Number Public 20Q2	0.159
RO60	Copy Number Public 20Q2	0.159
NPHS2	Copy Number Public 20Q2	0.159
RGSL1	Copy Number Public 20Q2	0.159
LINC01699	Copy Number Public 20Q2	0.158
IER5	Copy Number Public 20Q2	0.158
LINC01732	Copy Number Public 20Q2	0.158
TDRD5	Copy Number Public 20Q2	0.158
CACNA1E	Copy Number Public 20Q2	0.158
SWT1	Copy Number Public 20Q2	0.158
NMNAT2	Copy Number Public 20Q2	0.157
KIAA1614	Copy Number Public 20Q2	0.157
KIAA1614-AS1	Copy Number Public 20Q2	0.157
ACBD6	Copy Number Public 20Q2	0.156
SCARNA3	Copy Number Public 20Q2	0.156
IVNS1ABP	Copy Number Public 20Q2	0.156
LAMC1	Copy Number Public 20Q2	0.156
SHCBP1L	Copy Number Public 20Q2	0.156
RGS8	Copy Number Public 20Q2	0.156
LINC01688	Copy Number Public 20Q2	0.156
NPL	Copy Number Public 20Q2	0.156
MR1	Copy Number Public 20Q2	0.156
STX6	Copy Number Public 20Q2	0.156
TRMT1L	Copy Number Public 20Q2	0.156
SLC9C2	Copy Number Public 20Q2	0.155
CRYZL2P	Copy Number Public 20Q2	0.155
MIR3121	Copy Number Public 20Q2	0.155
ANGPTL1	Copy Number Public 20Q2	0.155
DHX9	Copy Number Public 20Q2	0.155
OVAAL	Copy Number Public 20Q2	0.155
LINC01633	Copy Number Public 20Q2	0.155
RNF2	Copy Number Public 20Q2	0.155
LHX4-AS1	Copy Number Public 20Q2	0.154
COP1	Copy Number Public 20Q2	0.154
LINC01657	Copy Number Public 20Q2	0.154
SMG7	Copy Number Public 20Q2	0.154
NCF2	Copy Number Public 20Q2	0.154
SMG7-AS1	Copy Number Public 20Q2	0.154
SNORD80	Copy Number Public 20Q2	0.154
GAS5-AS1	Copy Number Public 20Q2	0.154
SNORA103	Copy Number Public 20Q2	0.154
SNORD81	Copy Number Public 20Q2	0.154
SNORD79	Copy Number Public 20Q2	0.154
SNORD44	Copy Number Public 20Q2	0.154
SNORD47	Copy Number Public 20Q2	0.154
SNORD76	Copy Number Public 20Q2	0.154
SNORD77	Copy Number Public 20Q2	0.154
SNORD78	Copy Number Public 20Q2	0.154
GAS5	Copy Number Public 20Q2	0.154
HMCN1	Copy Number Public 20Q2	0.154
LINC01350	Copy Number Public 20Q2	0.154
LHX4	Copy Number Public 20Q2	0.154
APOBEC4	Copy Number Public 20Q2	0.154
RGL1	Copy Number Public 20Q2	0.154
ARPC5	Copy Number Public 20Q2	0.154
ZNF648	Copy Number Public 20Q2	0.154
LINC01344	Copy Number Public 20Q2	0.154
XPR1	Copy Number Public 20Q2	0.153
LHX9	Copy Number Public 20Q2	0.153
RABGAP1L	Copy Number Public 20Q2	0.152
RABGAP1L-DT	Copy Number Public 20Q2	0.152
AXDND1	Copy Number Public 20Q2	0.152
FMO4	Copy Number Public 20Q2	0.152
RASAL2	Copy Number Public 20Q2	0.152
RASAL2-AS1	Copy Number Public 20Q2	0.152
TOP1P1	Copy Number Public 20Q2	0.152
CASP17P	Copy Number (Absolute)	-0.12
CASP12	Copy Number (Absolute)	-0.12
CASP5	Copy Number (Absolute)	-0.119
CASP4	Copy Number (Absolute)	-0.119
ANKK1	Copy Number (Absolute)	-0.118
DRD2	Copy Number (Absolute)	-0.118
TTC12	Copy Number (Absolute)	-0.117
NCAM1-AS1	Copy Number (Absolute)	-0.117
LINC00900	Copy Number (Absolute)	-0.117
TPR	Copy Number (Absolute)	0.117
PRG4	Copy Number (Absolute)	0.117
OCLM	Copy Number (Absolute)	0.116
PDC	Copy Number (Absolute)	0.116
ODR4	Copy Number (Absolute)	0.116
SCARNA3	Copy Number (Absolute)	0.116
COP1	Copy Number (Absolute)	0.116
MIR4301	Copy Number (Absolute)	-0.116
RNF121	Copy Number (Absolute)	-0.115
APOA1	Copy Number (Absolute)	-0.115
SIK3	Copy Number (Absolute)	-0.115
LRTOMT	Copy Number (Absolute)	-0.115
TMPRSS5	Copy Number (Absolute)	-0.115
NUMA1	Copy Number (Absolute)	-0.115
IL18BP	Copy Number (Absolute)	-0.115
MIR3165	Copy Number (Absolute)	-0.115
AAMDC	Copy Number (Absolute)	-0.114
ZW10	Copy Number (Absolute)	-0.114
APOC3	Copy Number (Absolute)	-0.114
APOA4	Copy Number (Absolute)	-0.114
CASP1	Copy Number (Absolute)	-0.114
CARD16	Copy Number (Absolute)	-0.114
ZBTB16	Copy Number (Absolute)	-0.114
DDX10	Copy Number (Absolute)	-0.114
INTS4	Copy Number (Absolute)	-0.114
CARD18	Copy Number (Absolute)	-0.113
ABL2	Copy Number (Absolute)	0.113
TOR3A	Copy Number (Absolute)	0.113
FAM20B	Copy Number (Absolute)	0.113
SOAT1	Copy Number (Absolute)	0.113
CARD17	Copy Number (Absolute)	-0.113
MSANTD4	Copy Number (Absolute)	-0.113
HTR3B	Copy Number (Absolute)	-0.113
HTR3A	Copy Number (Absolute)	-0.113
NCAM1	Copy Number (Absolute)	-0.113
C11orf71	Copy Number (Absolute)	-0.113
SIK3-IT1	Copy Number (Absolute)	-0.112
FAM86C1	Copy Number (Absolute)	-0.112
CADM1	Copy Number (Absolute)	-0.112
POGLUT3	Copy Number (Absolute)	-0.112
SDHD	Copy Number (Absolute)	-0.112
IL18	Copy Number (Absolute)	-0.112
TIMM8B	Copy Number (Absolute)	-0.112
PTGS2	Copy Number (Absolute)	0.112
PLA2G4A	Copy Number (Absolute)	0.112
CLDN25	Copy Number (Absolute)	-0.112
USP28	Copy Number (Absolute)	-0.112
NNMT	Copy Number (Absolute)	-0.112
DEFB131B	Copy Number (Absolute)	-0.111
PAPPA2	Copy Number (Absolute)	0.111
ASTN1	Copy Number (Absolute)	0.111
HMCN1	Copy Number (Absolute)	0.111
C11orf65	Copy Number (Absolute)	-0.111
AXDND1	Copy Number (Absolute)	0.111
SIK2	Copy Number (Absolute)	-0.111
GRIA4	Copy Number (Absolute)	-0.111
RNF214	Copy Number (Absolute)	-0.111
EXPH5	Copy Number (Absolute)	-0.111
BCO2	Copy Number (Absolute)	-0.11
PTS	Copy Number (Absolute)	-0.11
TEX12	Copy Number (Absolute)	-0.11
PLET1	Copy Number (Absolute)	-0.11
DEFB108B	Copy Number (Absolute)	-0.11
HSPB2	Copy Number (Absolute)	-0.11
HSPB2-C11orf52	Copy Number (Absolute)	-0.11
CRYAB	Copy Number (Absolute)	-0.11
FDXACB1	Copy Number (Absolute)	-0.11
C11orf1	Copy Number (Absolute)	-0.11
C11orf52	Copy Number (Absolute)	-0.11
GPR52	Copy Number (Absolute)	0.109
IVNS1ABP	Copy Number (Absolute)	0.109
POU2AF1	Copy Number (Absolute)	-0.109
MIR4491	Copy Number (Absolute)	-0.109
LAYN	Copy Number (Absolute)	-0.109
COLCA1	Copy Number (Absolute)	-0.109
AQP11	Copy Number (Absolute)	-0.109
CLNS1A	Copy Number (Absolute)	-0.109
BUD13	Copy Number (Absolute)	-0.108
ZPR1	Copy Number (Absolute)	-0.108
ZC3H12C	Copy Number (Absolute)	-0.108
RDX	Copy Number (Absolute)	-0.108
MIR5579	Copy Number (Absolute)	-0.108
APOA5	Copy Number (Absolute)	-0.107
BACE1	Copy Number (Absolute)	-0.107
CEP164	Copy Number (Absolute)	-0.107
BACE1-AS	Copy Number (Absolute)	-0.107
NPHS2	Copy Number (Absolute)	0.107
AVPI1	Mutation Public 20Q2	-0.176
SH3BP4	Mutation Public 20Q2	-0.171
SVIL	Mutation Public 20Q2	-0.156
ELOVL6	Mutation Public 20Q2	-0.152
THEMIS2	Mutation Public 20Q2	-0.15
CCDC153	Mutation Public 20Q2	-0.147
MMP10	Mutation Public 20Q2	-0.145
ZKSCAN2	Mutation Public 20Q2	-0.145
FAM86C1	Mutation Public 20Q2	-0.143
TP53	Mutation Public 20Q2	-0.143
DDX18	Mutation Public 20Q2	-0.143
PLAC9	Mutation Public 20Q2	-0.142
EIF1	Mutation Public 20Q2	-0.142
LINC00999	Mutation Public 20Q2	-0.142
XPO1	Mutation Public 20Q2	-0.136
CCL26	Mutation Public 20Q2	-0.136
BCL2L11	Mutation Public 20Q2	-0.136
IL3	Mutation Public 20Q2	-0.134
CIRBP	Mutation Public 20Q2	-0.134
NUDT2	Mutation Public 20Q2	-0.133
SI	Mutation Public 20Q2	-0.133
TNFAIP8	Mutation Public 20Q2	-0.133
LRRK1	Mutation Public 20Q2	-0.133
PHKA1	Mutation Public 20Q2	-0.132
ALG8	Mutation Public 20Q2	-0.132
NPM3	Mutation Public 20Q2	-0.132
WDR25	Mutation Public 20Q2	-0.132
ARHGEF17	Mutation Public 20Q2	-0.131
UFSP2	Mutation Public 20Q2	-0.13
SBK2	Mutation Public 20Q2	-0.13
HSBP1L1	Mutation Public 20Q2	-0.13
C1orf53	Mutation Public 20Q2	-0.13
CALCOCO2	Mutation Public 20Q2	-0.129
EVI2A	Mutation Public 20Q2	-0.128
SEC14L4	Mutation Public 20Q2	-0.127
ANKRD20A2	Mutation Public 20Q2	-0.126
B3GLCT	Mutation Public 20Q2	-0.126
TUBB4B	Mutation Public 20Q2	-0.125
STOML3	Mutation Public 20Q2	-0.125
PET117	Mutation Public 20Q2	0.125
CT45A1	Mutation Public 20Q2	0.125
NXPE4	Mutation Public 20Q2	-0.125
MTFMT	Mutation Public 20Q2	-0.124
RPRD1B	Mutation Public 20Q2	-0.124
UGT1A8	Mutation Public 20Q2	-0.123
PES1	Mutation Public 20Q2	-0.123
ZNF740	Mutation Public 20Q2	-0.123
SERPINB10	Mutation Public 20Q2	-0.123
FAM222A	Mutation Public 20Q2	-0.123
ARSJ	Mutation Public 20Q2	-0.123
PYY	Mutation Public 20Q2	-0.122
LRIG2	Mutation Public 20Q2	-0.121
ZNF493	Mutation Public 20Q2	-0.121
MAP3K11	Mutation Public 20Q2	-0.121
IQCJ-SCHIP1	Mutation Public 20Q2	-0.121
LINGO2	Mutation Public 20Q2	-0.12
ACE	Mutation Public 20Q2	-0.12
HECW2	Mutation Public 20Q2	-0.119
DPY19L2	Mutation Public 20Q2	-0.119
NAPG	Mutation Public 20Q2	-0.118
AMPD2	Mutation Public 20Q2	-0.118
DBX1	Mutation Public 20Q2	-0.117
CCDC73	Mutation Public 20Q2	-0.117
DSN1	Mutation Public 20Q2	-0.117
TK1	Mutation Public 20Q2	-0.117
LGR6	Mutation Public 20Q2	-0.117
LUZP4	Mutation Public 20Q2	-0.117
RNF141	Mutation Public 20Q2	-0.117
NSMCE4A	Mutation Public 20Q2	-0.117
PDE6G	Mutation Public 20Q2	-0.116
DHRS7B	Mutation Public 20Q2	-0.115
ARHGAP6	Mutation Public 20Q2	-0.115
ATP10A	Mutation Public 20Q2	-0.115
SELE	Mutation Public 20Q2	-0.115
IDNK	Mutation Public 20Q2	0.115
ZSWIM6	Mutation Public 20Q2	-0.115
CEP120	Mutation Public 20Q2	-0.114
TMCC2	Mutation Public 20Q2	-0.114
INTS6	Mutation Public 20Q2	-0.113
FAM174C	Mutation Public 20Q2	-0.113
SOX30	Mutation Public 20Q2	-0.113
CDC42BPA	Mutation Public 20Q2	-0.113
DMRT1	Mutation Public 20Q2	-0.113
OTP	Mutation Public 20Q2	-0.113
C6orf132	Mutation Public 20Q2	-0.113
DCTN6	Mutation Public 20Q2	-0.113
PHACTR1	Mutation Public 20Q2	-0.113
MIGA1	Mutation Public 20Q2	-0.113
CSNK1E	Mutation Public 20Q2	-0.112
MNDA	Mutation Public 20Q2	-0.112
SERPINB9	Mutation Public 20Q2	-0.112
H2AB1	Mutation Public 20Q2	-0.112
FOXD4L3	Mutation Public 20Q2	-0.112
CDH22	Mutation Public 20Q2	-0.111
RSPH3	Mutation Public 20Q2	0.111
ZFR	Mutation Public 20Q2	-0.11
ITLN1	Mutation Public 20Q2	-0.11
STARD5	Mutation Public 20Q2	-0.11
PTK6	Mutation Public 20Q2	-0.11
STARD9	Mutation Public 20Q2	-0.11

## Sheet: CCNA1
Gene/Compound	Dataset	Correlation
CAB39L	CRISPR (Avana) Public 20Q2	0.279
POSTN	CRISPR (Avana) Public 20Q2	0.231
CCDC169	CRISPR (Avana) Public 20Q2	0.229
HTR2A	CRISPR (Avana) Public 20Q2	0.225
CRYL1	CRISPR (Avana) Public 20Q2	0.221
SPART	CRISPR (Avana) Public 20Q2	0.221
MEDAG	CRISPR (Avana) Public 20Q2	0.22
KRTAP10-6	CRISPR (Avana) Public 20Q2	-0.217
LIPK	CRISPR (Avana) Public 20Q2	0.214
TRPC4	CRISPR (Avana) Public 20Q2	0.208
KBTBD6	CRISPR (Avana) Public 20Q2	0.207
NAA16	CRISPR (Avana) Public 20Q2	0.207
SLC25A30	CRISPR (Avana) Public 20Q2	0.204
UBL3	CRISPR (Avana) Public 20Q2	0.202
PHF11	CRISPR (Avana) Public 20Q2	0.201
LHFPL6	CRISPR (Avana) Public 20Q2	0.195
N4BP2L1	CRISPR (Avana) Public 20Q2	0.19
IL11	CRISPR (Avana) Public 20Q2	-0.189
RCBTB2	CRISPR (Avana) Public 20Q2	0.189
FAM177B	CRISPR (Avana) Public 20Q2	0.187
RUBCNL	CRISPR (Avana) Public 20Q2	0.187
SIAH3	CRISPR (Avana) Public 20Q2	0.187
B3GLCT	CRISPR (Avana) Public 20Q2	0.185
COL27A1	CRISPR (Avana) Public 20Q2	0.185
N4BP2L2	CRISPR (Avana) Public 20Q2	0.185
ZFYVE19	CRISPR (Avana) Public 20Q2	0.184
SCN3A	CRISPR (Avana) Public 20Q2	0.183
PCDH8	CRISPR (Avana) Public 20Q2	0.182
NRBF2	CRISPR (Avana) Public 20Q2	0.182
HOXD13	CRISPR (Avana) Public 20Q2	0.181
REV3L	CRISPR (Avana) Public 20Q2	0.179
PDK1	CRISPR (Avana) Public 20Q2	0.179
PRR18	CRISPR (Avana) Public 20Q2	0.178
FOXF2	CRISPR (Avana) Public 20Q2	-0.178
RARRES2	CRISPR (Avana) Public 20Q2	0.178
SLC38A11	CRISPR (Avana) Public 20Q2	0.176
ARMC3	CRISPR (Avana) Public 20Q2	-0.176
SCGB3A1	CRISPR (Avana) Public 20Q2	0.174
NEK5	CRISPR (Avana) Public 20Q2	0.173
AGBL4	CRISPR (Avana) Public 20Q2	0.171
ARL5A	CRISPR (Avana) Public 20Q2	0.17
TNFAIP1	CRISPR (Avana) Public 20Q2	-0.17
BCO2	CRISPR (Avana) Public 20Q2	0.169
ZNF140	CRISPR (Avana) Public 20Q2	-0.169
KCTD4	CRISPR (Avana) Public 20Q2	0.168
CDC16	CRISPR (Avana) Public 20Q2	0.167
SOHLH2	CRISPR (Avana) Public 20Q2	0.166
MC4R	CRISPR (Avana) Public 20Q2	-0.164
AMER2	CRISPR (Avana) Public 20Q2	0.164
CPB2	CRISPR (Avana) Public 20Q2	0.164
RIMS2	CRISPR (Avana) Public 20Q2	0.164
DHRS12	CRISPR (Avana) Public 20Q2	0.164
RXFP2	CRISPR (Avana) Public 20Q2	0.163
PCDH9	CRISPR (Avana) Public 20Q2	0.163
PDYN	CRISPR (Avana) Public 20Q2	0.162
OR4D6	CRISPR (Avana) Public 20Q2	-0.161
AOC1	CRISPR (Avana) Public 20Q2	0.161
CCNB3	CRISPR (Avana) Public 20Q2	0.161
DGKH	CRISPR (Avana) Public 20Q2	0.161
ZFAND4	CRISPR (Avana) Public 20Q2	0.16
FGD1	CRISPR (Avana) Public 20Q2	0.16
ARFGEF3	CRISPR (Avana) Public 20Q2	-0.16
BORA	CRISPR (Avana) Public 20Q2	0.16
TNFSF11	CRISPR (Avana) Public 20Q2	0.16
CCDC3	CRISPR (Avana) Public 20Q2	0.16
GPALPP1	CRISPR (Avana) Public 20Q2	0.159
PROSER1	CRISPR (Avana) Public 20Q2	0.159
DCLK1	CRISPR (Avana) Public 20Q2	0.159
KRTAP9-6	CRISPR (Avana) Public 20Q2	-0.159
FAM216B	CRISPR (Avana) Public 20Q2	0.158
FAM13C	CRISPR (Avana) Public 20Q2	0.158
SGPL1	CRISPR (Avana) Public 20Q2	0.158
CCDC148	CRISPR (Avana) Public 20Q2	0.157
CLDN16	CRISPR (Avana) Public 20Q2	-0.157
OR13C2	CRISPR (Avana) Public 20Q2	-0.157
GPR143	CRISPR (Avana) Public 20Q2	0.157
SPRR3	CRISPR (Avana) Public 20Q2	-0.157
CST2	CRISPR (Avana) Public 20Q2	0.156
C2orf72	CRISPR (Avana) Public 20Q2	-0.156
SLC26A3	CRISPR (Avana) Public 20Q2	0.156
FBXO21	CRISPR (Avana) Public 20Q2	0.156
SUN5	CRISPR (Avana) Public 20Q2	0.155
ZNF510	CRISPR (Avana) Public 20Q2	-0.155
SERTM1	CRISPR (Avana) Public 20Q2	0.155
GABRG3	CRISPR (Avana) Public 20Q2	-0.155
ITGBL1	CRISPR (Avana) Public 20Q2	0.153
FAM170B	CRISPR (Avana) Public 20Q2	0.153
ATP6AP1L	CRISPR (Avana) Public 20Q2	0.153
SRRM4	CRISPR (Avana) Public 20Q2	0.153
KLHL14	CRISPR (Avana) Public 20Q2	0.152
MGAT2	CRISPR (Avana) Public 20Q2	-0.152
ODF2L	CRISPR (Avana) Public 20Q2	0.152
KCNT2	CRISPR (Avana) Public 20Q2	0.151
HOXD8	CRISPR (Avana) Public 20Q2	0.151
BIVM	CRISPR (Avana) Public 20Q2	0.151
AP3D1	CRISPR (Avana) Public 20Q2	-0.151
UGGT2	CRISPR (Avana) Public 20Q2	0.15
MAB21L1	CRISPR (Avana) Public 20Q2	0.15
NBEAL1	CRISPR (Avana) Public 20Q2	0.15
PABPC3	CRISPR (Avana) Public 20Q2	0.149
GAL3ST3	Expression Public 20Q2	-0.198
TRIM67	Expression Public 20Q2	-0.188
HRH3	Expression Public 20Q2	-0.174
UNC80	Expression Public 20Q2	-0.168
SCRT2	Expression Public 20Q2	-0.166
CACNA1B	Expression Public 20Q2	-0.165
ACTL6B	Expression Public 20Q2	-0.164
CHRNB2	Expression Public 20Q2	-0.162
DCX	Expression Public 20Q2	-0.156
UNC5A	Expression Public 20Q2	-0.156
CSRNP3	Expression Public 20Q2	-0.156
AKAIN1	Expression Public 20Q2	-0.155
UNC79	Expression Public 20Q2	-0.155
TMEM179	Expression Public 20Q2	-0.154
SLC18A3	Expression Public 20Q2	-0.154
SCRT1	Expression Public 20Q2	-0.153
INSRR	Expression Public 20Q2	-0.152
FEV	Expression Public 20Q2	-0.152
ST8SIA3	Expression Public 20Q2	-0.152
KCNC1	Expression Public 20Q2	-0.152
CIRBP	Expression Public 20Q2	-0.151
PNMA8B	Expression Public 20Q2	-0.151
MRFAP1L1	Expression Public 20Q2	-0.151
SEZ6L	Expression Public 20Q2	-0.151
NRSN1	Expression Public 20Q2	-0.15
KCNK3	Expression Public 20Q2	-0.15
SYN1	Expression Public 20Q2	-0.15
GRIK5	Expression Public 20Q2	-0.15
AGBL4	Expression Public 20Q2	-0.148
ELAVL3	Expression Public 20Q2	-0.148
GRM2	Expression Public 20Q2	-0.148
BSN	Expression Public 20Q2	-0.148
LHFPL4	Expression Public 20Q2	-0.147
SVOP	Expression Public 20Q2	-0.147
SNAP25	Expression Public 20Q2	-0.147
ARMCX4	Expression Public 20Q2	-0.146
SLC7A14	Expression Public 20Q2	-0.145
ZNF334	Expression Public 20Q2	-0.145
FAM162B	Expression Public 20Q2	-0.144
ELAVL4	Expression Public 20Q2	-0.144
SCG3	Expression Public 20Q2	-0.144
CDO1	Expression Public 20Q2	-0.144
TMC2	Expression Public 20Q2	-0.143
DGKB	Expression Public 20Q2	-0.143
RBFOX1	Expression Public 20Q2	-0.142
CELF3	Expression Public 20Q2	-0.142
IFI30	Expression Public 20Q2	0.141
ZNF860	Expression Public 20Q2	0.14
SIX2	Expression Public 20Q2	-0.139
SLC7A5	Expression Public 20Q2	0.139
TMSB15B	Expression Public 20Q2	-0.139
CRMP1	Expression Public 20Q2	-0.139
HERC6	Expression Public 20Q2	0.138
PHYHIPL	Expression Public 20Q2	-0.138
SLC3A2	Expression Public 20Q2	0.137
SRRM4	Expression Public 20Q2	-0.137
B3GAT1	Expression Public 20Q2	-0.137
SNAP91	Expression Public 20Q2	-0.137
OSBPL10	Expression Public 20Q2	0.137
GDAP1L1	Expression Public 20Q2	-0.137
DPYSL4	Expression Public 20Q2	-0.136
CDH7	Expression Public 20Q2	-0.135
SHISA7	Expression Public 20Q2	-0.135
TLCD3B	Expression Public 20Q2	-0.134
ZCCHC9	Expression Public 20Q2	0.134
IFIH1	Expression Public 20Q2	0.134
HLA-E	Expression Public 20Q2	0.133
CDK7	Expression Public 20Q2	0.133
UBE2QL1	Expression Public 20Q2	-0.133
DUSP26	Expression Public 20Q2	-0.133
CHGB	Expression Public 20Q2	-0.133
NTN3	Expression Public 20Q2	-0.133
KCNJ9	Expression Public 20Q2	-0.132
IGFBPL1	Expression Public 20Q2	-0.132
GPX7	Expression Public 20Q2	-0.132
NACAD	Expression Public 20Q2	-0.131
CLVS2	Expression Public 20Q2	-0.131
SCN3B	Expression Public 20Q2	-0.131
ZSCAN1	Expression Public 20Q2	-0.13
GPR19	Expression Public 20Q2	-0.13
PCDH8	Expression Public 20Q2	-0.13
REEP5	Expression Public 20Q2	0.13
RGS7	Expression Public 20Q2	-0.13
ADGRB3	Expression Public 20Q2	-0.13
PROX1	Expression Public 20Q2	-0.13
MYT1L	Expression Public 20Q2	-0.129
SOX11	Expression Public 20Q2	-0.129
ST6GALNAC5	Expression Public 20Q2	-0.129
RAMP2	Expression Public 20Q2	-0.128
AMER3	Expression Public 20Q2	-0.128
FOXN4	Expression Public 20Q2	-0.128
GRM7	Expression Public 20Q2	-0.128
BHLHE40	Expression Public 20Q2	0.128
C20orf96	Expression Public 20Q2	-0.128
DDX25	Expression Public 20Q2	-0.128
SETSIP	Expression Public 20Q2	0.128
ASPN	Expression Public 20Q2	0.128
CALY	Expression Public 20Q2	-0.127
DCHS1	Expression Public 20Q2	-0.127
SLC1A5	Expression Public 20Q2	0.127
MYCN	Copy Number Public 20Q2	-0.119
MYCNOS	Copy Number Public 20Q2	-0.119
MYCNUT	Copy Number Public 20Q2	-0.119
STIM2	Copy Number Public 20Q2	-0.117
STIM2-AS1	Copy Number Public 20Q2	-0.117
WDR11	Copy Number Public 20Q2	0.115
WDR11-AS1	Copy Number Public 20Q2	0.115
GACAT3	Copy Number Public 20Q2	-0.112
LINC01561	Copy Number Public 20Q2	0.112
PLPP4	Copy Number Public 20Q2	0.111
WHAMMP3	Copy Number Public 20Q2	0.11
SLIT2-IT1	Copy Number Public 20Q2	-0.11
NIPA1	Copy Number Public 20Q2	0.11
KCNIP4	Copy Number Public 20Q2	-0.11
PACRGL	Copy Number Public 20Q2	-0.11
MIR218-1	Copy Number Public 20Q2	-0.109
CCKAR	Copy Number Public 20Q2	-0.107
RBPJ	Copy Number Public 20Q2	-0.107
SMIM20	Copy Number Public 20Q2	-0.105
SEL1L3	Copy Number Public 20Q2	-0.105
TAPT1-AS1	Copy Number Public 20Q2	-0.105
SLC34A2	Copy Number Public 20Q2	-0.104
TBC1D19	Copy Number Public 20Q2	-0.104
SLIT2	Copy Number Public 20Q2	-0.102
ANAPC4	Copy Number Public 20Q2	-0.102
PCAT2	Copy Number Public 20Q2	0.1
PRNCR1	Copy Number Public 20Q2	0.1
TNS2	Copy Number Public 20Q2	0.1
MIR6757	Copy Number Public 20Q2	0.1
PCAT1	Copy Number Public 20Q2	0.099
B3GLCT	Copy Number Public 20Q2	-0.098
IGHV1OR15-1	Copy Number Public 20Q2	0.098
KCNIP4-IT1	Copy Number Public 20Q2	-0.097
MICAL3	Copy Number Public 20Q2	0.097
FAM230D	Copy Number Public 20Q2	0.097
SELENOF	Copy Number Public 20Q2	-0.097
SH3GLB1	Copy Number Public 20Q2	-0.097
FAM239B	Copy Number Public 20Q2	0.097
FAM239A	Copy Number Public 20Q2	0.097
DNMT1	Copy Number Public 20Q2	-0.097
EIF3G	Copy Number Public 20Q2	-0.097
CLCA3P	Copy Number Public 20Q2	-0.096
ADGRA3	Copy Number Public 20Q2	-0.096
GALNT6	Copy Number Public 20Q2	0.096
LDLR	Copy Number Public 20Q2	-0.096
CLCA4	Copy Number Public 20Q2	-0.096
SLC4A8	Copy Number Public 20Q2	0.095
EIF4B	Copy Number Public 20Q2	0.095
CELA1	Copy Number Public 20Q2	0.095
SMAGP	Copy Number Public 20Q2	0.095
BIN2	Copy Number Public 20Q2	0.095
SMARCA4	Copy Number Public 20Q2	-0.095
SNORD105B	Copy Number Public 20Q2	-0.095
P2RY11	Copy Number Public 20Q2	-0.095
C1QTNF7	Copy Number Public 20Q2	-0.095
SNORD105	Copy Number Public 20Q2	-0.095
MIR3198-1	Copy Number Public 20Q2	0.095
LINC00528	Copy Number Public 20Q2	0.095
IGHV1OR15-3	Copy Number Public 20Q2	0.095
DAZAP2	Copy Number Public 20Q2	0.095
POU6F1	Copy Number Public 20Q2	0.095
CCDC149	Copy Number Public 20Q2	-0.094
SOD3	Copy Number Public 20Q2	-0.094
LGI2	Copy Number Public 20Q2	-0.094
BCL2L13	Copy Number Public 20Q2	0.094
LCORL	Copy Number Public 20Q2	-0.094
CECR2	Copy Number Public 20Q2	0.094
RDH8	Copy Number Public 20Q2	-0.093
EFCAB2	Copy Number Public 20Q2	-0.093
GGTLC3	Copy Number Public 20Q2	0.093
ODF2L	Copy Number Public 20Q2	-0.093
MIR7856	Copy Number Public 20Q2	-0.093
MED28	Copy Number Public 20Q2	-0.093
FAM184B	Copy Number Public 20Q2	-0.093
RIMBP3	Copy Number Public 20Q2	0.093
PI4KAP1	Copy Number Public 20Q2	0.093
TMEM191B	Copy Number Public 20Q2	0.093
CARM1	Copy Number Public 20Q2	-0.093
PPAN-P2RY11	Copy Number Public 20Q2	-0.093
PPAN	Copy Number Public 20Q2	-0.093
ANGPTL6	Copy Number Public 20Q2	-0.093
C3P1	Copy Number Public 20Q2	-0.093
MIR5589	Copy Number Public 20Q2	-0.093
PRAM1	Copy Number Public 20Q2	-0.093
QDPR	Copy Number Public 20Q2	-0.093
SNORA75B	Copy Number Public 20Q2	-0.093
ACADM	Copy Number Public 20Q2	-0.093
DLSTP1	Copy Number Public 20Q2	-0.093
ZNF844	Copy Number Public 20Q2	-0.093
HNRNPM	Copy Number Public 20Q2	-0.092
DCAF16	Copy Number Public 20Q2	-0.092
CDKN2B	Copy Number (Absolute)	-0.098
TMPRSS15	Copy Number (Absolute)	0.097
CDKN2B-AS1	Copy Number (Absolute)	-0.092
DNAJC17	Copy Number (Absolute)	0.092
RMDN3	Copy Number (Absolute)	0.092
GCHFR	Copy Number (Absolute)	0.092
C15orf62	Copy Number (Absolute)	0.092
SPINT1	Copy Number (Absolute)	0.091
ZFYVE19	Copy Number (Absolute)	0.09
PPP1R14D	Copy Number (Absolute)	0.09
RHOV	Copy Number (Absolute)	0.09
POU6F1	Copy Number (Absolute)	0.089
INO80	Copy Number (Absolute)	0.088
C1QL4	Copy Number (Absolute)	0.087
TROAP	Copy Number (Absolute)	0.087
DNAJC22	Copy Number (Absolute)	0.087
SPATS2	Copy Number (Absolute)	0.087
CHAC1	Copy Number (Absolute)	0.087
VPS18	Copy Number (Absolute)	0.087
TUBA1C	Copy Number (Absolute)	0.087
TUBA1A	Copy Number (Absolute)	0.087
PRPH	Copy Number (Absolute)	0.087
TUBA1B	Copy Number (Absolute)	0.087
DLL4	Copy Number (Absolute)	0.086
DHH	Copy Number (Absolute)	0.086
LMBR1L	Copy Number (Absolute)	0.086
SOAT2	Copy Number (Absolute)	0.086
IGFBP6	Copy Number (Absolute)	0.086
CHODL-AS1	Copy Number (Absolute)	0.086
C21orf91	Copy Number (Absolute)	0.086
C21orf91-OT1	Copy Number (Absolute)	0.086
AQP6	Copy Number (Absolute)	0.086
AQP5	Copy Number (Absolute)	0.086
ATF1	Copy Number (Absolute)	0.085
RAD51	Copy Number (Absolute)	0.085
RAD51-AS1	Copy Number (Absolute)	0.085
TMPRSS12	Copy Number (Absolute)	0.085
KRT18	Copy Number (Absolute)	0.085
CHODL	Copy Number (Absolute)	0.085
BTG3	Copy Number (Absolute)	0.085
AQP2	Copy Number (Absolute)	0.084
LINC02396	Copy Number (Absolute)	0.084
FAIM2	Copy Number (Absolute)	0.084
KMT2D	Copy Number (Absolute)	0.084
RHEBL1	Copy Number (Absolute)	0.084
LARP4	Copy Number (Absolute)	0.084
RACGAP1	Copy Number (Absolute)	0.084
SMAGP	Copy Number (Absolute)	0.084
BIN2	Copy Number (Absolute)	0.084
DAZAP2	Copy Number (Absolute)	0.084
DIP2B	Copy Number (Absolute)	0.084
FMNL3	Copy Number (Absolute)	0.083
FAM186B	Copy Number (Absolute)	0.083
PRPF40B	Copy Number (Absolute)	0.083
KCNH3	Copy Number (Absolute)	0.083
MCRS1	Copy Number (Absolute)	0.083
COX14	Copy Number (Absolute)	0.083
SMARCD1	Copy Number (Absolute)	0.083
ASIC1	Copy Number (Absolute)	0.083
GPD1	Copy Number (Absolute)	0.083
FKBP11	Copy Number (Absolute)	0.083
DDN	Copy Number (Absolute)	0.083
RND1	Copy Number (Absolute)	0.083
ARF3	Copy Number (Absolute)	0.083
CCDC65	Copy Number (Absolute)	0.083
PRKAG1	Copy Number (Absolute)	0.083
WNT1	Copy Number (Absolute)	0.083
WNT10B	Copy Number (Absolute)	0.083
DDX23	Copy Number (Absolute)	0.083
TMBIM6	Copy Number (Absolute)	0.083
NCKAP5L	Copy Number (Absolute)	0.083
LIMA1	Copy Number (Absolute)	0.082
MIR1293	Copy Number (Absolute)	0.082
PLA2G4E	Copy Number (Absolute)	0.082
SORD	Copy Number (Absolute)	0.082
CACNB3	Copy Number (Absolute)	0.082
TEX49	Copy Number (Absolute)	0.082
ADCY6	Copy Number (Absolute)	0.082
MIR4701	Copy Number (Absolute)	0.082
BCDIN3D	Copy Number (Absolute)	0.082
BCDIN3D-AS1	Copy Number (Absolute)	0.082
CERS5	Copy Number (Absolute)	0.082
MIR1206	Copy Number (Absolute)	0.082
FAM186A	Copy Number (Absolute)	0.082
CELA1	Copy Number (Absolute)	0.082
GALNT6	Copy Number (Absolute)	0.082
MIR1205	Copy Number (Absolute)	0.082
LINC01549	Copy Number (Absolute)	0.082
RPAP1	Copy Number (Absolute)	0.082
PLA2G4D	Copy Number (Absolute)	0.082
CSRNP2	Copy Number (Absolute)	0.081
HIGD1C	Copy Number (Absolute)	0.081
SLC11A2	Copy Number (Absolute)	0.081
METTL7A	Copy Number (Absolute)	0.081
LETMD1	Copy Number (Absolute)	0.081
C15orf54	Copy Number (Absolute)	0.081
KRT86	Copy Number (Absolute)	0.081
EIF4B	Copy Number (Absolute)	0.081
MS4A7	Mutation Public 20Q2	0.181
CA5A	Mutation Public 20Q2	-0.152
EDDM3A	Mutation Public 20Q2	-0.15
DEFB4B	Mutation Public 20Q2	-0.143
MTRNR2L7	Mutation Public 20Q2	-0.143
CCR9	Mutation Public 20Q2	-0.143
HAAO	Mutation Public 20Q2	-0.142
WNT4	Mutation Public 20Q2	-0.141
CCDC179	Mutation Public 20Q2	-0.137
ZFP92	Mutation Public 20Q2	-0.135
LYPD1	Mutation Public 20Q2	0.134
SH3RF1	Mutation Public 20Q2	0.131
PFN1	Mutation Public 20Q2	-0.128
PSORS1C1	Mutation Public 20Q2	-0.123
FAM156A	Mutation Public 20Q2	-0.121
ARSF	Mutation Public 20Q2	0.121
KIR3DL1	Mutation Public 20Q2	-0.119
GJA8	Mutation Public 20Q2	0.119
VCX3A	Mutation Public 20Q2	-0.118
ZNF701	Mutation Public 20Q2	0.117
ZNF860	Mutation Public 20Q2	-0.115
CD72	Mutation Public 20Q2	0.115
TEAD4	Mutation Public 20Q2	0.113
DNM1	Mutation Public 20Q2	0.112
CYP2J2	Mutation Public 20Q2	0.112
EIF5	Mutation Public 20Q2	-0.111
DUSP6	Mutation Public 20Q2	-0.109
DEFB135	Mutation Public 20Q2	-0.109
LINC01560	Mutation Public 20Q2	-0.109
CLEC19A	Mutation Public 20Q2	-0.109
IL3	Mutation Public 20Q2	0.108
RUFY3	Mutation Public 20Q2	0.108
LRTOMT	Mutation Public 20Q2	-0.108
AQP6	Mutation Public 20Q2	-0.107
CD79B	Mutation Public 20Q2	-0.107
MAP2K5	Mutation Public 20Q2	0.107
CENPJ	Mutation Public 20Q2	0.107
SPRED2	Mutation Public 20Q2	-0.107
EPHA1	Mutation Public 20Q2	0.107
GALNT9	Mutation Public 20Q2	-0.106
CALCA	Mutation Public 20Q2	0.106
FBLN5	Mutation Public 20Q2	0.106
CXorf38	Mutation Public 20Q2	-0.106
LCK	Mutation Public 20Q2	0.105
MIS12	Mutation Public 20Q2	0.105
RIF1	Mutation Public 20Q2	-0.105
NSMCE3	Mutation Public 20Q2	0.105
CIB1	Mutation Public 20Q2	-0.105
HCAR3	Mutation Public 20Q2	-0.104
SEMA4F	Mutation Public 20Q2	0.104
PAG1	Mutation Public 20Q2	0.103
C11orf21	Mutation Public 20Q2	-0.102
NAALADL1	Mutation Public 20Q2	0.102
FIGLA	Mutation Public 20Q2	-0.102
CLC	Mutation Public 20Q2	0.102
VSIG10	Mutation Public 20Q2	-0.102
SELENOS	Mutation Public 20Q2	0.102
FSTL5	Mutation Public 20Q2	0.102
SHLD2	Mutation Public 20Q2	-0.101
YPEL3	Mutation Public 20Q2	0.101
SMIM1	Mutation Public 20Q2	0.101
RAD9B	Mutation Public 20Q2	-0.101
MEGF10	Mutation Public 20Q2	0.1
MPC1	Mutation Public 20Q2	-0.1
GPR37L1	Mutation Public 20Q2	0.1
GOLGA8B	Mutation Public 20Q2	0.1
VSTM2L	Mutation Public 20Q2	0.1
IFI35	Mutation Public 20Q2	-0.099
SIGLEC8	Mutation Public 20Q2	0.099
SLCO3A1	Mutation Public 20Q2	0.099
CHD1	Mutation Public 20Q2	0.098
TMEM256	Mutation Public 20Q2	-0.098
APOM	Mutation Public 20Q2	-0.098
TSLP	Mutation Public 20Q2	0.098
CCDC117	Mutation Public 20Q2	-0.098
FBXO16	Mutation Public 20Q2	-0.098
CD5L	Mutation Public 20Q2	0.098
PPDPFL	Mutation Public 20Q2	0.098
ADGRL4	Mutation Public 20Q2	0.098
GPER1	Mutation Public 20Q2	0.098
MILR1	Mutation Public 20Q2	0.098
NDUFC1	Mutation Public 20Q2	-0.098
KLF16	Mutation Public 20Q2	0.097
TOMM6	Mutation Public 20Q2	0.097
C8B	Mutation Public 20Q2	-0.097
CCL17	Mutation Public 20Q2	-0.097
ZSWIM5	Mutation Public 20Q2	-0.096
SERPINA5	Mutation Public 20Q2	0.096
USP49	Mutation Public 20Q2	0.096
KIAA0100	Mutation Public 20Q2	0.096
ETFB	Mutation Public 20Q2	-0.096
DCDC2B	Mutation Public 20Q2	-0.096
APLP1	Mutation Public 20Q2	-0.096
C1QB	Mutation Public 20Q2	-0.094
PGLYRP4	Mutation Public 20Q2	-0.093
JAML	Mutation Public 20Q2	-0.091
BLCAP	Mutation Public 20Q2	-0.09
BLOC1S5-TXNDC5	Mutation Public 20Q2	-0.085
PAFAH1B2	Mutation Public 20Q2	-0.084

## Sheet: CCNA2
Gene/Compound	Dataset	Correlation
CDC25B	CRISPR (Avana) Public 20Q2	0.292
FOXM1	CRISPR (Avana) Public 20Q2	0.282
FBXO5	CRISPR (Avana) Public 20Q2	0.262
EXOSC9	CRISPR (Avana) Public 20Q2	0.24
AP5S1	CRISPR (Avana) Public 20Q2	0.222
HECTD1	CRISPR (Avana) Public 20Q2	0.206
RAD51	CRISPR (Avana) Public 20Q2	0.204
CCNB1	CRISPR (Avana) Public 20Q2	0.202
TERF2	CRISPR (Avana) Public 20Q2	0.197
PKMYT1	CRISPR (Avana) Public 20Q2	-0.196
NCAPH2	CRISPR (Avana) Public 20Q2	0.195
SPEF1	CRISPR (Avana) Public 20Q2	0.194
ITGB2	CRISPR (Avana) Public 20Q2	0.192
FH	CRISPR (Avana) Public 20Q2	-0.191
ZNF559	CRISPR (Avana) Public 20Q2	0.19
RFWD3	CRISPR (Avana) Public 20Q2	0.19
SYT13	CRISPR (Avana) Public 20Q2	-0.19
CDK2	CRISPR (Avana) Public 20Q2	0.189
BORA	CRISPR (Avana) Public 20Q2	0.186
PSG6	CRISPR (Avana) Public 20Q2	0.186
LHB	CRISPR (Avana) Public 20Q2	0.183
CDK1	CRISPR (Avana) Public 20Q2	0.182
VCPIP1	CRISPR (Avana) Public 20Q2	0.181
SMC2	CRISPR (Avana) Public 20Q2	0.181
SNRPA1	CRISPR (Avana) Public 20Q2	0.179
ARFGAP3	CRISPR (Avana) Public 20Q2	0.178
TRAIP	CRISPR (Avana) Public 20Q2	0.178
KRTAP5-2	CRISPR (Avana) Public 20Q2	0.178
ANAPC4	CRISPR (Avana) Public 20Q2	0.177
POLR2C	CRISPR (Avana) Public 20Q2	0.176
YWHAE	CRISPR (Avana) Public 20Q2	-0.175
C20orf202	CRISPR (Avana) Public 20Q2	0.174
CA1	CRISPR (Avana) Public 20Q2	-0.173
TRAPPC8	CRISPR (Avana) Public 20Q2	0.173
DCPS	CRISPR (Avana) Public 20Q2	-0.171
SLC25A53	CRISPR (Avana) Public 20Q2	0.171
RAN	CRISPR (Avana) Public 20Q2	0.17
RESF1	CRISPR (Avana) Public 20Q2	0.17
CKS2	CRISPR (Avana) Public 20Q2	-0.17
PRIM1	CRISPR (Avana) Public 20Q2	0.169
LPIN2	CRISPR (Avana) Public 20Q2	0.167
SF3B5	CRISPR (Avana) Public 20Q2	0.166
FOXD4	CRISPR (Avana) Public 20Q2	0.166
HSPA5	CRISPR (Avana) Public 20Q2	0.166
MMS22L	CRISPR (Avana) Public 20Q2	0.165
ESPL1	CRISPR (Avana) Public 20Q2	0.165
NR3C1	CRISPR (Avana) Public 20Q2	0.165
CHAC2	CRISPR (Avana) Public 20Q2	0.165
PFN4	CRISPR (Avana) Public 20Q2	0.164
LRRC4C	CRISPR (Avana) Public 20Q2	-0.164
OR10J5	CRISPR (Avana) Public 20Q2	-0.163
ZNF284	CRISPR (Avana) Public 20Q2	0.163
SFR1	CRISPR (Avana) Public 20Q2	0.163
IFITM2	CRISPR (Avana) Public 20Q2	0.162
PLK1	CRISPR (Avana) Public 20Q2	0.162
CST2	CRISPR (Avana) Public 20Q2	0.162
DONSON	CRISPR (Avana) Public 20Q2	0.161
ANAPC15	CRISPR (Avana) Public 20Q2	0.161
KRTAP10-9	CRISPR (Avana) Public 20Q2	0.16
SLC5A9	CRISPR (Avana) Public 20Q2	-0.16
PSMC2	CRISPR (Avana) Public 20Q2	0.159
FGF20	CRISPR (Avana) Public 20Q2	0.159
PARP10	CRISPR (Avana) Public 20Q2	0.159
SNAPC2	CRISPR (Avana) Public 20Q2	0.159
CDC45	CRISPR (Avana) Public 20Q2	0.158
GPR143	CRISPR (Avana) Public 20Q2	0.158
SNU13	CRISPR (Avana) Public 20Q2	0.158
PMPCB	CRISPR (Avana) Public 20Q2	0.158
ZNF254	CRISPR (Avana) Public 20Q2	0.157
PSMA3	CRISPR (Avana) Public 20Q2	0.157
PSMA2	CRISPR (Avana) Public 20Q2	0.157
RBM5	CRISPR (Avana) Public 20Q2	-0.157
RBM39	CRISPR (Avana) Public 20Q2	0.157
TSPYL5	CRISPR (Avana) Public 20Q2	0.156
OR7A17	CRISPR (Avana) Public 20Q2	0.156
ZER1	CRISPR (Avana) Public 20Q2	0.155
SAGE1	CRISPR (Avana) Public 20Q2	0.155
ARIH1	CRISPR (Avana) Public 20Q2	0.155
C5orf30	CRISPR (Avana) Public 20Q2	0.155
U2AF2	CRISPR (Avana) Public 20Q2	0.155
NUTF2	CRISPR (Avana) Public 20Q2	0.155
ZRANB1	CRISPR (Avana) Public 20Q2	0.155
OR2AE1	CRISPR (Avana) Public 20Q2	-0.155
KRTAP10-11	CRISPR (Avana) Public 20Q2	0.154
PRNP	CRISPR (Avana) Public 20Q2	0.153
FBXO4	CRISPR (Avana) Public 20Q2	0.153
STX5	CRISPR (Avana) Public 20Q2	0.153
WDHD1	CRISPR (Avana) Public 20Q2	0.153
SKA3	CRISPR (Avana) Public 20Q2	0.153
XRCC3	CRISPR (Avana) Public 20Q2	0.152
TRMT6	CRISPR (Avana) Public 20Q2	-0.152
KRTAP10-3	CRISPR (Avana) Public 20Q2	0.152
OR56B1	CRISPR (Avana) Public 20Q2	-0.152
CST3	CRISPR (Avana) Public 20Q2	0.152
CNIH4	CRISPR (Avana) Public 20Q2	0.151
TMPRSS11F	CRISPR (Avana) Public 20Q2	0.151
SARS1	CRISPR (Avana) Public 20Q2	0.15
DDX41	CRISPR (Avana) Public 20Q2	0.15
PTPA	CRISPR (Avana) Public 20Q2	-0.15
KCNA4	CRISPR (Avana) Public 20Q2	-0.147
CCNA1	Expression Public 20Q2	0.14
MTFP1	Expression Public 20Q2	0.138
EFNA2	Expression Public 20Q2	0.137
BACE1	Expression Public 20Q2	-0.129
NSUN5	Expression Public 20Q2	0.128
C11orf87	Expression Public 20Q2	-0.128
ADAMTSL5	Expression Public 20Q2	0.127
PICALM	Expression Public 20Q2	-0.126
TRABD	Expression Public 20Q2	0.123
GPR12	Expression Public 20Q2	-0.123
FAM20B	Expression Public 20Q2	-0.122
CCDC149	Expression Public 20Q2	-0.122
NPR3	Expression Public 20Q2	-0.12
GJA3	Expression Public 20Q2	0.119
MTRES1	Expression Public 20Q2	-0.119
FGF16	Expression Public 20Q2	-0.118
CAMK4	Expression Public 20Q2	0.117
TAGLN	Expression Public 20Q2	-0.116
TRH	Expression Public 20Q2	-0.116
XAGE3	Expression Public 20Q2	0.115
GPR89B	Expression Public 20Q2	-0.115
SLC16A2	Expression Public 20Q2	-0.114
SETD9	Expression Public 20Q2	0.114
C1orf43	Expression Public 20Q2	-0.114
FAT3	Expression Public 20Q2	-0.113
MS4A10	Expression Public 20Q2	-0.113
FCHO1	Expression Public 20Q2	0.113
USP17L20	Expression Public 20Q2	-0.113
ETFRF1	Expression Public 20Q2	-0.112
AK3	Expression Public 20Q2	-0.112
ZNF565	Expression Public 20Q2	-0.111
SUCO	Expression Public 20Q2	-0.111
GPR137C	Expression Public 20Q2	-0.111
CNN1	Expression Public 20Q2	-0.11
FLRT2	Expression Public 20Q2	-0.11
ADSS2	Expression Public 20Q2	-0.11
PRDM7	Expression Public 20Q2	0.11
CCDC160	Expression Public 20Q2	-0.11
LSM6	Expression Public 20Q2	0.109
CALCA	Expression Public 20Q2	-0.109
MEST	Expression Public 20Q2	-0.108
DMRTC2	Expression Public 20Q2	-0.108
CPA6	Expression Public 20Q2	0.108
KRCC1	Expression Public 20Q2	-0.108
EXOC1L	Expression Public 20Q2	-0.108
DEFB110	Expression Public 20Q2	-0.107
SLC41A3	Expression Public 20Q2	-0.107
GPRASP1	Expression Public 20Q2	-0.107
ZNF460	Expression Public 20Q2	0.107
TMEM26	Expression Public 20Q2	-0.107
ERAS	Expression Public 20Q2	-0.107
NLRP8	Expression Public 20Q2	-0.107
PACS1	Expression Public 20Q2	-0.107
APOBEC4	Expression Public 20Q2	-0.107
NKX3-2	Expression Public 20Q2	-0.106
KRTCAP2	Expression Public 20Q2	-0.106
CIAO2B	Expression Public 20Q2	0.106
TIMM44	Expression Public 20Q2	0.106
RB1CC1	Expression Public 20Q2	-0.106
KRT222	Expression Public 20Q2	-0.105
STARD4	Expression Public 20Q2	0.105
RDH14	Expression Public 20Q2	-0.105
LELP1	Expression Public 20Q2	0.105
AP4S1	Expression Public 20Q2	-0.105
DSG4	Expression Public 20Q2	0.105
RPUSD2	Expression Public 20Q2	0.105
TMEM178B	Expression Public 20Q2	-0.105
SLC26A4	Expression Public 20Q2	0.105
DCN	Expression Public 20Q2	-0.105
ACTG2	Expression Public 20Q2	-0.105
OR4K13	Expression Public 20Q2	-0.104
TYMP	Expression Public 20Q2	0.104
HGSNAT	Expression Public 20Q2	-0.104
SSX4	Expression Public 20Q2	0.104
GLIS1	Expression Public 20Q2	-0.104
H2AB1	Expression Public 20Q2	0.104
CASC1	Expression Public 20Q2	-0.104
SRPX2	Expression Public 20Q2	-0.104
CD14	Expression Public 20Q2	-0.104
OR51E1	Expression Public 20Q2	-0.103
CTLA4	Expression Public 20Q2	0.103
CPE	Expression Public 20Q2	-0.103
LY6H	Expression Public 20Q2	-0.103
CLIC6	Expression Public 20Q2	-0.103
OR14I1	Expression Public 20Q2	-0.103
KRT83	Expression Public 20Q2	-0.103
TBCEL	Expression Public 20Q2	-0.103
SDF2L1	Expression Public 20Q2	0.103
C11orf53	Expression Public 20Q2	-0.103
GGPS1	Expression Public 20Q2	-0.103
ALKAL1	Expression Public 20Q2	-0.103
MICU2	Expression Public 20Q2	-0.103
GNA14	Expression Public 20Q2	-0.102
POGLUT3	Expression Public 20Q2	-0.102
TRPV2	Expression Public 20Q2	0.102
NOCT	Expression Public 20Q2	0.102
KRT27	Expression Public 20Q2	0.102
ARID4B	Expression Public 20Q2	-0.102
ATPAF1	Expression Public 20Q2	-0.102
POTEJ	Expression Public 20Q2	-0.102
MCCC2	Copy Number Public 20Q2	0.146
FCHO2	Copy Number Public 20Q2	0.129
MIR582	Copy Number Public 20Q2	0.129
CCDC125	Copy Number Public 20Q2	0.127
ENPEP	Copy Number Public 20Q2	0.126
PITX2	Copy Number Public 20Q2	0.126
PANCR	Copy Number Public 20Q2	0.126
ZSWIM6	Copy Number Public 20Q2	0.126
LINC02057	Copy Number Public 20Q2	0.126
LRRC70	Copy Number Public 20Q2	0.126
SMIM15	Copy Number Public 20Q2	0.126
SMIM15-AS1	Copy Number Public 20Q2	0.126
KRTCAP2	Copy Number Public 20Q2	-0.126
HTR1A	Copy Number Public 20Q2	0.126
PKLR	Copy Number Public 20Q2	-0.126
MIR297	Copy Number Public 20Q2	0.125
MIER3	Copy Number Public 20Q2	0.125
IPO11	Copy Number Public 20Q2	0.125
CARTPT	Copy Number Public 20Q2	0.125
MIR4804	Copy Number Public 20Q2	0.124
DPM3	Copy Number Public 20Q2	-0.124
RGS7BP	Copy Number Public 20Q2	0.124
FDPS	Copy Number Public 20Q2	-0.123
OCLN	Copy Number Public 20Q2	0.123
SETD9	Copy Number Public 20Q2	0.123
RNF180	Copy Number Public 20Q2	0.123
SHISAL2B	Copy Number Public 20Q2	0.123
C1orf43	Copy Number Public 20Q2	-0.123
TRIM46	Copy Number Public 20Q2	-0.123
C5orf64	Copy Number Public 20Q2	0.123
ACTBL2	Copy Number Public 20Q2	0.122
LINC02225	Copy Number Public 20Q2	0.122
RUSC1-AS1	Copy Number Public 20Q2	-0.122
RUSC1	Copy Number Public 20Q2	-0.122
C5orf64-AS1	Copy Number Public 20Q2	0.122
UBAP2L	Copy Number Public 20Q2	-0.122
DIMT1	Copy Number Public 20Q2	0.122
KCNN3	Copy Number Public 20Q2	-0.122
PBXIP1	Copy Number Public 20Q2	-0.122
KIF2A	Copy Number Public 20Q2	0.122
EFNA1	Copy Number Public 20Q2	-0.121
C1orf189	Copy Number Public 20Q2	-0.121
MIR190B	Copy Number Public 20Q2	-0.121
SREK1IP1	Copy Number Public 20Q2	0.121
CWC27	Copy Number Public 20Q2	0.121
MIR4803	Copy Number Public 20Q2	0.121
MAP1B	Copy Number Public 20Q2	0.121
MRPS27	Copy Number Public 20Q2	0.121
SERF1A	Copy Number Public 20Q2	0.121
SERF1B	Copy Number Public 20Q2	0.121
SMN1	Copy Number Public 20Q2	0.121
SMN2	Copy Number Public 20Q2	0.121
ADAR	Copy Number Public 20Q2	-0.121
EFNA3	Copy Number Public 20Q2	-0.121
SNORA58B	Copy Number Public 20Q2	-0.121
HCN3	Copy Number Public 20Q2	-0.121
TPM3	Copy Number Public 20Q2	-0.121
MIR5698	Copy Number Public 20Q2	-0.121
PTCD2	Copy Number Public 20Q2	0.121
SLC50A1	Copy Number Public 20Q2	-0.12
PYGO2	Copy Number Public 20Q2	-0.12
SHC1	Copy Number Public 20Q2	-0.12
CKS1B	Copy Number Public 20Q2	-0.12
MIR4258	Copy Number Public 20Q2	-0.12
ATP8B2	Copy Number Public 20Q2	-0.12
PMVK	Copy Number Public 20Q2	-0.12
AQP10	Copy Number Public 20Q2	-0.12
UBE2Q1-AS1	Copy Number Public 20Q2	-0.12
CHRNB2	Copy Number Public 20Q2	-0.12
HAX1	Copy Number Public 20Q2	-0.12
SEC24B	Copy Number Public 20Q2	0.12
SEC24B-AS1	Copy Number Public 20Q2	0.12
GBA	Copy Number Public 20Q2	-0.12
NDUFAF2	Copy Number Public 20Q2	0.119
TNPO1	Copy Number Public 20Q2	0.119
CLK2	Copy Number Public 20Q2	-0.119
SCAMP3	Copy Number Public 20Q2	-0.119
ZNF366	Copy Number Public 20Q2	0.119
LINC02056	Copy Number Public 20Q2	0.119
ERCC8	Copy Number Public 20Q2	0.119
PPWD1	Copy Number Public 20Q2	0.118
IL6R	Copy Number Public 20Q2	-0.118
IL6R-AS1	Copy Number Public 20Q2	-0.118
RNF214	Copy Number Public 20Q2	-0.118
CENPK	Copy Number Public 20Q2	0.118
MAST4	Copy Number Public 20Q2	0.118
RPL34-AS1	Copy Number Public 20Q2	0.118
LINC02065	Copy Number Public 20Q2	0.118
LINC02229	Copy Number Public 20Q2	0.118
FAM189B	Copy Number Public 20Q2	-0.118
KCNN3	Copy Number (Absolute)	-0.141
CKS1B	Copy Number (Absolute)	-0.14
MIR4258	Copy Number (Absolute)	-0.14
PMVK	Copy Number (Absolute)	-0.14
PYGO2	Copy Number (Absolute)	-0.14
PBXIP1	Copy Number (Absolute)	-0.14
SHC1	Copy Number (Absolute)	-0.14
TRIM46	Copy Number (Absolute)	-0.14
MUC1	Copy Number (Absolute)	-0.14
KRTCAP2	Copy Number (Absolute)	-0.14
C1orf43	Copy Number (Absolute)	-0.139
UBAP2L	Copy Number (Absolute)	-0.139
TPM3	Copy Number (Absolute)	-0.138
C1orf189	Copy Number (Absolute)	-0.138
MIR190B	Copy Number (Absolute)	-0.138
SLC50A1	Copy Number (Absolute)	-0.137
DPM3	Copy Number (Absolute)	-0.137
EFNA1	Copy Number (Absolute)	-0.137
UBE2Q1	Copy Number (Absolute)	-0.137
SHE	Copy Number (Absolute)	-0.137
CHRNB2	Copy Number (Absolute)	-0.137
ADAR	Copy Number (Absolute)	-0.137
ZBTB7B	Copy Number (Absolute)	-0.137
DCST2	Copy Number (Absolute)	-0.137
LENEP	Copy Number (Absolute)	-0.137
FLAD1	Copy Number (Absolute)	-0.137
LINC00964	Copy Number (Absolute)	-0.137
ZNF572	Copy Number (Absolute)	-0.137
WASHC5	Copy Number (Absolute)	-0.137
SQLE	Copy Number (Absolute)	-0.137
NSMCE2	Copy Number (Absolute)	-0.137
SLC39A1	Copy Number (Absolute)	-0.137
JTB	Copy Number (Absolute)	-0.137
CRTC2	Copy Number (Absolute)	-0.137
CREB3L4	Copy Number (Absolute)	-0.137
RAB13	Copy Number (Absolute)	-0.137
RPS27	Copy Number (Absolute)	-0.137
NUP210L	Copy Number (Absolute)	-0.137
DENND4B	Copy Number (Absolute)	-0.137
IL6R	Copy Number (Absolute)	-0.137
EFNA3	Copy Number (Absolute)	-0.136
TDRD10	Copy Number (Absolute)	-0.134
HAX1	Copy Number (Absolute)	-0.134
ADAM15	Copy Number (Absolute)	-0.134
EFNA4	Copy Number (Absolute)	-0.134
DCST1	Copy Number (Absolute)	-0.134
DCST1-AS1	Copy Number (Absolute)	-0.134
FAM49B	Copy Number (Absolute)	-0.134
AQP10	Copy Number (Absolute)	-0.134
ATP8B2	Copy Number (Absolute)	-0.134
LINC00861	Copy Number (Absolute)	-0.133
FAM189B	Copy Number (Absolute)	-0.133
SCAMP3	Copy Number (Absolute)	-0.133
CLK2	Copy Number (Absolute)	-0.133
ASAP1	Copy Number (Absolute)	-0.132
MIR5194	Copy Number (Absolute)	-0.132
ASAP1-IT2	Copy Number (Absolute)	-0.132
HCN3	Copy Number (Absolute)	-0.132
PKLR	Copy Number (Absolute)	-0.132
RUSC1-AS1	Copy Number (Absolute)	-0.132
RUSC1	Copy Number (Absolute)	-0.132
FDPS	Copy Number (Absolute)	-0.132
GBAP1	Copy Number (Absolute)	-0.132
GBA	Copy Number (Absolute)	-0.132
THBS3	Copy Number (Absolute)	-0.132
MTX1	Copy Number (Absolute)	-0.132
MIR92B	Copy Number (Absolute)	-0.132
GATAD2B	Copy Number (Absolute)	-0.131
SLC27A3	Copy Number (Absolute)	-0.131
TRIB1	Copy Number (Absolute)	-0.131
INTS3	Copy Number (Absolute)	-0.13
NPR1	Copy Number (Absolute)	-0.13
ILF2	Copy Number (Absolute)	-0.13
SNAPIN	Copy Number (Absolute)	-0.13
QSOX1	Copy Number (Absolute)	-0.129
CRNN	Copy Number (Absolute)	-0.129
MIR2053	Copy Number (Absolute)	-0.129
POU5F1P4	Copy Number (Absolute)	-0.128
ASH1L	Copy Number (Absolute)	-0.128
MIR555	Copy Number (Absolute)	-0.128
MROH1	Copy Number (Absolute)	-0.128
SCX	Copy Number (Absolute)	-0.128
HGH1	Copy Number (Absolute)	-0.128
RAD21	Copy Number (Absolute)	-0.128
S100A14	Copy Number (Absolute)	-0.128
CHTOP	Copy Number (Absolute)	-0.128
S100A16	Copy Number (Absolute)	-0.128
S100A13	Copy Number (Absolute)	-0.128
S100A1	Copy Number (Absolute)	-0.128
LRRC14	Copy Number (Absolute)	-0.128
ARHGAP39	Copy Number (Absolute)	-0.128
LRRC24	Copy Number (Absolute)	-0.128
C8orf82	Copy Number (Absolute)	-0.128
MTSS1	Copy Number (Absolute)	-0.128
NDUFB9	Copy Number (Absolute)	-0.128
ZNF250	Copy Number (Absolute)	-0.128
COMMD5	Copy Number (Absolute)	-0.128
KIFAP3	Copy Number (Absolute)	-0.127
SAMSN1-AS1	Copy Number (Absolute)	-0.127
MIR661	Copy Number (Absolute)	-0.127
GAL3ST2	Mutation Public 20Q2	0.15
RPL17	Mutation Public 20Q2	-0.142
RASSF1	Mutation Public 20Q2	0.141
PPM1J	Mutation Public 20Q2	0.138
SPRR4	Mutation Public 20Q2	0.137
ACSF3	Mutation Public 20Q2	0.136
ZNF141	Mutation Public 20Q2	0.136
CAPSL	Mutation Public 20Q2	0.136
PRSS27	Mutation Public 20Q2	0.136
BLACE	Mutation Public 20Q2	-0.135
ZNF212	Mutation Public 20Q2	0.134
CTSG	Mutation Public 20Q2	-0.134
ZNF789	Mutation Public 20Q2	0.133
NPTX2	Mutation Public 20Q2	-0.133
DRD1	Mutation Public 20Q2	-0.131
SMC3	Mutation Public 20Q2	0.13
MSH2	Mutation Public 20Q2	0.129
LRP11	Mutation Public 20Q2	0.129
KRT36	Mutation Public 20Q2	0.128
MYH15	Mutation Public 20Q2	0.128
DEFB116	Mutation Public 20Q2	0.127
RBFOX1	Mutation Public 20Q2	0.127
AADACL4	Mutation Public 20Q2	0.125
MRPS35	Mutation Public 20Q2	0.125
CARD16	Mutation Public 20Q2	0.124
USP17L22	Mutation Public 20Q2	0.123
OR52N5	Mutation Public 20Q2	0.123
PGM1	Mutation Public 20Q2	0.122
SERINC5	Mutation Public 20Q2	0.122
INS	Mutation Public 20Q2	-0.121
LIPG	Mutation Public 20Q2	0.12
PYCARD	Mutation Public 20Q2	0.12
PANK2	Mutation Public 20Q2	0.119
PRDX2	Mutation Public 20Q2	-0.119
ZNRF1	Mutation Public 20Q2	0.119
TRAPPC2B	Mutation Public 20Q2	-0.119
CHST12	Mutation Public 20Q2	0.119
LSM1	Mutation Public 20Q2	0.119
RNASE9	Mutation Public 20Q2	0.119
CRB3	Mutation Public 20Q2	0.118
ADI1	Mutation Public 20Q2	0.118
CES2	Mutation Public 20Q2	0.118
RHPN2	Mutation Public 20Q2	0.118
KCNE1	Mutation Public 20Q2	-0.118
TMEM270	Mutation Public 20Q2	-0.118
KIAA0232	Mutation Public 20Q2	0.118
GTF2IRD1	Mutation Public 20Q2	0.117
CSPG5	Mutation Public 20Q2	0.116
LIN28A	Mutation Public 20Q2	0.116
TBX6	Mutation Public 20Q2	0.116
BBOF1	Mutation Public 20Q2	-0.115
CCL11	Mutation Public 20Q2	0.115
SMG6	Mutation Public 20Q2	0.115
NIPAL1	Mutation Public 20Q2	-0.115
SNAPC3	Mutation Public 20Q2	0.115
RAB36	Mutation Public 20Q2	0.115
LIMK2	Mutation Public 20Q2	0.115
ADAMTS5	Mutation Public 20Q2	0.115
NPW	Mutation Public 20Q2	0.115
RPLP2	Mutation Public 20Q2	0.114
BRI3	Mutation Public 20Q2	0.114
LRRC4B	Mutation Public 20Q2	0.114
C16orf95	Mutation Public 20Q2	0.114
CNOT9	Mutation Public 20Q2	0.114
CDC23	Mutation Public 20Q2	0.114
CTNNA1	Mutation Public 20Q2	0.113
INCA1	Mutation Public 20Q2	0.113
KRTAP19-7	Mutation Public 20Q2	0.113
PROB1	Mutation Public 20Q2	0.113
PLEKHA6	Mutation Public 20Q2	0.113
CALM2	Mutation Public 20Q2	0.113
HCFC1R1	Mutation Public 20Q2	0.113
ZBTB1	Mutation Public 20Q2	0.113
SUGT1	Mutation Public 20Q2	0.112
BLK	Mutation Public 20Q2	0.112
DYTN	Mutation Public 20Q2	0.112
RNASEK	Mutation Public 20Q2	0.112
GRAP	Mutation Public 20Q2	0.112
CT47A6	Mutation Public 20Q2	0.112
ZP2	Mutation Public 20Q2	0.112
CASQ2	Mutation Public 20Q2	0.112
LEMD1	Mutation Public 20Q2	0.112
CTDSP2	Mutation Public 20Q2	-0.111
TMEM9B	Mutation Public 20Q2	0.111
GALNT2	Mutation Public 20Q2	0.111
FOXG1	Mutation Public 20Q2	0.111
CRACD	Mutation Public 20Q2	0.111
PCDHGC4	Mutation Public 20Q2	0.111
DLGAP1	Mutation Public 20Q2	0.11
GAMT	Mutation Public 20Q2	0.11
TRIM37	Mutation Public 20Q2	-0.11
ANGPT1	Mutation Public 20Q2	0.109
FXYD7	Mutation Public 20Q2	0.109
RPL9	Mutation Public 20Q2	-0.108
PRRC2A	Mutation Public 20Q2	0.108
GDF1	Mutation Public 20Q2	-0.108
ARNT	Mutation Public 20Q2	0.108
ALKBH5	Mutation Public 20Q2	0.108
OR2G2	Mutation Public 20Q2	-0.107
GALM	Mutation Public 20Q2	0.107

## Sheet: CCND1
Gene/Compound	Dataset	Correlation
CDK4	CRISPR (Avana) Public 20Q2	0.384
DYRK1A	CRISPR (Avana) Public 20Q2	-0.309
MRGPRD	CRISPR (Avana) Public 20Q2	0.265
RBL1	CRISPR (Avana) Public 20Q2	0.262
MYEOV	CRISPR (Avana) Public 20Q2	0.256
IGHMBP2	CRISPR (Avana) Public 20Q2	0.248
BRAF	CRISPR (Avana) Public 20Q2	0.247
E2F3	CRISPR (Avana) Public 20Q2	-0.245
THAP1	CRISPR (Avana) Public 20Q2	0.24
CDKN1A	CRISPR (Avana) Public 20Q2	-0.239
MSI2	CRISPR (Avana) Public 20Q2	0.238
CCND2	CRISPR (Avana) Public 20Q2	-0.235
CPT1A	CRISPR (Avana) Public 20Q2	0.23
NUDT8	CRISPR (Avana) Public 20Q2	0.227
DUSP4	CRISPR (Avana) Public 20Q2	0.227
MYB	CRISPR (Avana) Public 20Q2	-0.226
FAM53C	CRISPR (Avana) Public 20Q2	0.225
TMEM134	CRISPR (Avana) Public 20Q2	0.223
CRKL	CRISPR (Avana) Public 20Q2	0.221
FAM117B	CRISPR (Avana) Public 20Q2	0.22
IPO5	CRISPR (Avana) Public 20Q2	0.218
MITF	CRISPR (Avana) Public 20Q2	0.217
PYROXD1	CRISPR (Avana) Public 20Q2	0.214
SOX10	CRISPR (Avana) Public 20Q2	0.211
TESMIN	CRISPR (Avana) Public 20Q2	0.205
TPCN2	CRISPR (Avana) Public 20Q2	0.204
PITPNM1	CRISPR (Avana) Public 20Q2	0.203
THOC5	CRISPR (Avana) Public 20Q2	-0.203
MAPK1	CRISPR (Avana) Public 20Q2	0.202
GAL	CRISPR (Avana) Public 20Q2	0.201
SASS6	CRISPR (Avana) Public 20Q2	0.2
CCNE1	CRISPR (Avana) Public 20Q2	-0.2
ATG2A	CRISPR (Avana) Public 20Q2	0.199
CDK2	CRISPR (Avana) Public 20Q2	-0.199
CCS	CRISPR (Avana) Public 20Q2	0.199
ILK	CRISPR (Avana) Public 20Q2	0.197
TP53	CRISPR (Avana) Public 20Q2	-0.195
AIP	CRISPR (Avana) Public 20Q2	0.195
FOSL1	CRISPR (Avana) Public 20Q2	0.193
FERMT3	CRISPR (Avana) Public 20Q2	0.193
LRFN4	CRISPR (Avana) Public 20Q2	0.191
FGF4	CRISPR (Avana) Public 20Q2	0.191
GSTP1	CRISPR (Avana) Public 20Q2	0.19
LIMS1	CRISPR (Avana) Public 20Q2	0.19
FGF19	CRISPR (Avana) Public 20Q2	0.189
CDKN1C	CRISPR (Avana) Public 20Q2	-0.188
RBMS1	CRISPR (Avana) Public 20Q2	0.188
SKP2	CRISPR (Avana) Public 20Q2	-0.187
FAM120A	CRISPR (Avana) Public 20Q2	0.186
AMBRA1	CRISPR (Avana) Public 20Q2	-0.186
RCE1	CRISPR (Avana) Public 20Q2	0.186
METAP1	CRISPR (Avana) Public 20Q2	0.186
CCNF	CRISPR (Avana) Public 20Q2	0.185
PTK2	CRISPR (Avana) Public 20Q2	0.185
SOX9	CRISPR (Avana) Public 20Q2	0.184
CABP4	CRISPR (Avana) Public 20Q2	0.184
ZSWIM6	CRISPR (Avana) Public 20Q2	-0.183
CBFB	CRISPR (Avana) Public 20Q2	-0.182
USP38	CRISPR (Avana) Public 20Q2	0.182
MRGPRF	CRISPR (Avana) Public 20Q2	0.182
C16orf72	CRISPR (Avana) Public 20Q2	0.182
FGF3	CRISPR (Avana) Public 20Q2	0.182
MDM2	CRISPR (Avana) Public 20Q2	0.182
IPO9	CRISPR (Avana) Public 20Q2	0.181
LBHD1	CRISPR (Avana) Public 20Q2	0.18
B4GALNT2	CRISPR (Avana) Public 20Q2	0.179
MCM6	CRISPR (Avana) Public 20Q2	-0.178
MCL1	CRISPR (Avana) Public 20Q2	-0.178
NIPBL	CRISPR (Avana) Public 20Q2	0.177
CCDC85B	CRISPR (Avana) Public 20Q2	0.177
TEAD1	CRISPR (Avana) Public 20Q2	0.177
CKS1B	CRISPR (Avana) Public 20Q2	-0.177
CTSF	CRISPR (Avana) Public 20Q2	0.177
TERF1	CRISPR (Avana) Public 20Q2	0.177
TLN1	CRISPR (Avana) Public 20Q2	0.177
PRKAR2B	CRISPR (Avana) Public 20Q2	0.176
ARHGAP45	CRISPR (Avana) Public 20Q2	-0.176
ZNF622	CRISPR (Avana) Public 20Q2	0.175
TBC1D10C	CRISPR (Avana) Public 20Q2	0.175
RUNX1	CRISPR (Avana) Public 20Q2	-0.174
ADD1	CRISPR (Avana) Public 20Q2	-0.174
TCF12	CRISPR (Avana) Public 20Q2	-0.174
CD248	CRISPR (Avana) Public 20Q2	0.174
TEDC2	CRISPR (Avana) Public 20Q2	0.173
RSU1	CRISPR (Avana) Public 20Q2	0.173
RPS6KA3	CRISPR (Avana) Public 20Q2	0.172
YIF1A	CRISPR (Avana) Public 20Q2	0.172
METAP2	CRISPR (Avana) Public 20Q2	0.172
RTF2	CRISPR (Avana) Public 20Q2	-0.171
POLD4	CRISPR (Avana) Public 20Q2	0.171
ECM1	CRISPR (Avana) Public 20Q2	-0.17
ATP1B3	CRISPR (Avana) Public 20Q2	-0.17
GCLC	CRISPR (Avana) Public 20Q2	-0.168
CTTN	CRISPR (Avana) Public 20Q2	0.168
MAP3K11	CRISPR (Avana) Public 20Q2	0.168
KMT5B	CRISPR (Avana) Public 20Q2	0.167
HIKESHI	CRISPR (Avana) Public 20Q2	0.167
STK24	CRISPR (Avana) Public 20Q2	-0.166
EIF4E2	CRISPR (Avana) Public 20Q2	-0.166
ABCF2	CRISPR (Avana) Public 20Q2	0.165
CCND1	Expression Public 20Q2	-0.537
CTTN	Expression Public 20Q2	-0.308
CCND3	Expression Public 20Q2	0.306
MAP4K1	Expression Public 20Q2	0.305
MYEOV	Expression Public 20Q2	-0.297
CCND2	Expression Public 20Q2	0.289
CCNE1	Expression Public 20Q2	0.289
FMN1	Expression Public 20Q2	-0.287
MLPH	Expression Public 20Q2	-0.286
USP49	Expression Public 20Q2	0.283
GULP1	Expression Public 20Q2	-0.281
CDKN2A	Expression Public 20Q2	0.281
PYGB	Expression Public 20Q2	-0.275
CLDN12	Expression Public 20Q2	-0.275
GFI1	Expression Public 20Q2	0.275
CBFA2T3	Expression Public 20Q2	0.273
SNX20	Expression Public 20Q2	0.273
TBC1D10C	Expression Public 20Q2	0.27
CPN1	Expression Public 20Q2	-0.27
C9orf40	Expression Public 20Q2	0.268
NCKAP1	Expression Public 20Q2	-0.268
IKZF1	Expression Public 20Q2	0.268
WAS	Expression Public 20Q2	0.267
ARHGAP9	Expression Public 20Q2	0.265
PTPN7	Expression Public 20Q2	0.264
RETSAT	Expression Public 20Q2	-0.261
PXN	Expression Public 20Q2	-0.261
MYO1G	Expression Public 20Q2	0.26
ACVR1	Expression Public 20Q2	-0.26
FRMD5	Expression Public 20Q2	-0.26
CORO1A	Expression Public 20Q2	0.259
CORO1B	Expression Public 20Q2	-0.259
SASH3	Expression Public 20Q2	0.258
PMEL	Expression Public 20Q2	-0.258
NCF4	Expression Public 20Q2	0.257
PHLDA1	Expression Public 20Q2	-0.256
TBC1D16	Expression Public 20Q2	-0.256
RBPMS	Expression Public 20Q2	-0.256
ARHGAP30	Expression Public 20Q2	0.256
SOWAHD	Expression Public 20Q2	0.255
LHX2	Expression Public 20Q2	0.255
SPRY4	Expression Public 20Q2	-0.254
PLEK	Expression Public 20Q2	0.253
RBM38	Expression Public 20Q2	0.253
CTNND1	Expression Public 20Q2	-0.253
STAC3	Expression Public 20Q2	0.252
KIF21B	Expression Public 20Q2	0.252
TNFAIP8L2	Expression Public 20Q2	0.252
IL21R	Expression Public 20Q2	0.251
WASL	Expression Public 20Q2	-0.251
CD37	Expression Public 20Q2	0.25
TTC8	Expression Public 20Q2	-0.249
RNF128	Expression Public 20Q2	-0.249
CDKAL1	Expression Public 20Q2	0.248
SPN	Expression Public 20Q2	0.248
SH3D19	Expression Public 20Q2	-0.248
CD63	Expression Public 20Q2	-0.248
ALOX5AP	Expression Public 20Q2	0.248
TSPOAP1	Expression Public 20Q2	0.248
KLHDC3	Expression Public 20Q2	0.248
PHLDA2	Expression Public 20Q2	-0.247
DKK1	Expression Public 20Q2	-0.247
CAMK2N1	Expression Public 20Q2	-0.247
KCNAB1	Expression Public 20Q2	-0.247
ACAP1	Expression Public 20Q2	0.247
IL2RG	Expression Public 20Q2	0.246
KLHL6	Expression Public 20Q2	0.246
APOD	Expression Public 20Q2	-0.246
IL10RA	Expression Public 20Q2	0.246
C19orf38	Expression Public 20Q2	0.245
PRPF38A	Expression Public 20Q2	0.245
SNAI3	Expression Public 20Q2	0.244
TOM1L1	Expression Public 20Q2	-0.244
DUSP4	Expression Public 20Q2	-0.244
MYO1B	Expression Public 20Q2	-0.244
TRAF3IP3	Expression Public 20Q2	0.244
ARL11	Expression Public 20Q2	0.243
FMNL1	Expression Public 20Q2	0.243
PLCG2	Expression Public 20Q2	0.242
P2RY8	Expression Public 20Q2	0.242
ARPC1A	Expression Public 20Q2	-0.242
NPAS2	Expression Public 20Q2	-0.241
RHBDF1	Expression Public 20Q2	-0.241
VAV1	Expression Public 20Q2	0.241
CSF2RB	Expression Public 20Q2	0.24
TYR	Expression Public 20Q2	-0.24
SPI1	Expression Public 20Q2	0.238
DERL3	Expression Public 20Q2	0.238
UCP2	Expression Public 20Q2	0.238
NUDT12	Expression Public 20Q2	-0.238
ARHGAP15	Expression Public 20Q2	0.237
CXorf21	Expression Public 20Q2	0.237
STAP1	Expression Public 20Q2	0.237
MANBAL	Expression Public 20Q2	-0.237
WDFY1	Expression Public 20Q2	-0.237
RASGRP2	Expression Public 20Q2	0.237
HCK	Expression Public 20Q2	0.237
FAM78A	Expression Public 20Q2	0.236
RB1	Expression Public 20Q2	-0.236
SCNM1	Expression Public 20Q2	0.236
CDKN2A-DT	Copy Number Public 20Q2	0.24
CDKN2A	Copy Number Public 20Q2	0.24
CDKN2B	Copy Number Public 20Q2	0.229
CDKN2B-AS1	Copy Number Public 20Q2	0.222
MIR4665	Copy Number Public 20Q2	0.214
PTPRD-AS1	Copy Number Public 20Q2	0.214
PTPRD	Copy Number Public 20Q2	0.214
IL33	Copy Number Public 20Q2	0.212
TPD52L3	Copy Number Public 20Q2	0.212
UHRF2	Copy Number Public 20Q2	0.212
PTPRD-AS2	Copy Number Public 20Q2	0.211
RANBP6	Copy Number Public 20Q2	0.211
DMAC1	Copy Number Public 20Q2	0.21
RIC1	Copy Number Public 20Q2	0.21
MLANA	Copy Number Public 20Q2	0.208
KIAA2026	Copy Number Public 20Q2	0.208
RLN1	Copy Number Public 20Q2	0.207
RLN2	Copy Number Public 20Q2	0.207
PLGRKT	Copy Number Public 20Q2	0.207
ERMP1	Copy Number Public 20Q2	0.207
CD274	Copy Number Public 20Q2	0.207
PDCD1LG2	Copy Number Public 20Q2	0.207
INSL4	Copy Number Public 20Q2	0.205
CDC37L1	Copy Number Public 20Q2	0.205
CDC37L1-DT	Copy Number Public 20Q2	0.205
AK3	Copy Number Public 20Q2	0.204
PLPP6	Copy Number Public 20Q2	0.202
RCL1	Copy Number Public 20Q2	0.202
INSL6	Copy Number Public 20Q2	0.201
MIR101-2	Copy Number Public 20Q2	0.201
SMARCA2	Copy Number Public 20Q2	0.2
GLDC	Copy Number Public 20Q2	0.199
JAK2	Copy Number Public 20Q2	0.198
SPATA6L	Copy Number Public 20Q2	0.196
NGFR	Copy Number Public 20Q2	-0.195
LINC02075	Copy Number Public 20Q2	-0.195
CER1	Copy Number Public 20Q2	0.195
FREM1	Copy Number Public 20Q2	0.195
ZDHHC21	Copy Number Public 20Q2	0.194
GLIS3-AS1	Copy Number Public 20Q2	0.194
WTAP	Copy Number Public 20Q2	0.194
CCDC171	Copy Number Public 20Q2	0.194
KDM4C	Copy Number Public 20Q2	0.193
PHB	Copy Number Public 20Q2	-0.193
ZNF652	Copy Number Public 20Q2	-0.192
MIR6129	Copy Number Public 20Q2	-0.192
MAS1	Copy Number Public 20Q2	0.191
SNAPC3	Copy Number Public 20Q2	0.191
TTC39B	Copy Number Public 20Q2	0.191
RFX3-AS1	Copy Number Public 20Q2	0.19
GLIS3	Copy Number Public 20Q2	0.19
SLC1A1	Copy Number Public 20Q2	0.19
NFIB	Copy Number Public 20Q2	0.189
MPDZ	Copy Number Public 20Q2	0.189
AIRN	Copy Number Public 20Q2	0.189
VLDLR	Copy Number Public 20Q2	0.189
VLDLR-AS1	Copy Number Public 20Q2	0.189
PSIP1	Copy Number Public 20Q2	0.189
LURAP1L	Copy Number Public 20Q2	0.188
TYRP1	Copy Number Public 20Q2	0.188
LURAP1L-AS1	Copy Number Public 20Q2	0.188
MIR3918	Copy Number Public 20Q2	0.188
EZR	Copy Number Public 20Q2	0.188
SNORD137	Copy Number Public 20Q2	0.187
SCARNA8	Copy Number Public 20Q2	0.187
MIR6165	Copy Number Public 20Q2	-0.187
KCNV2	Copy Number Public 20Q2	0.186
SOX4	Copy Number Public 20Q2	0.186
CASC15	Copy Number Public 20Q2	0.186
LINC00581	Copy Number Public 20Q2	0.186
ACAT2	Copy Number Public 20Q2	0.186
SOD2-OT1	Copy Number Public 20Q2	0.186
MRPL18	Copy Number Public 20Q2	0.186
PNLDC1	Copy Number Public 20Q2	0.186
SNORA29	Copy Number Public 20Q2	0.186
SNORA20	Copy Number Public 20Q2	0.186
TCP1	Copy Number Public 20Q2	0.186
ABI3	Copy Number Public 20Q2	-0.186
GNGT2	Copy Number Public 20Q2	-0.186
LINC00583	Copy Number Public 20Q2	0.185
C9orf92	Copy Number Public 20Q2	0.185
PLIN2	Copy Number Public 20Q2	0.185
TMEM242	Copy Number Public 20Q2	0.185
HAUS6	Copy Number Public 20Q2	0.185
RRAGA	Copy Number Public 20Q2	0.185
ADAMTSL1	Copy Number Public 20Q2	0.184
RSPH3	Copy Number Public 20Q2	0.184
FNDC1	Copy Number Public 20Q2	0.184
TAGAP	Copy Number Public 20Q2	0.184
MIR3152	Copy Number Public 20Q2	0.184
ZDHHC14	Copy Number Public 20Q2	0.184
MIR3692	Copy Number Public 20Q2	0.183
ARID1B	Copy Number Public 20Q2	0.183
SNORD28B	Copy Number Public 20Q2	0.183
MIR4466	Copy Number Public 20Q2	0.183
LINC01235	Copy Number Public 20Q2	0.183
DMRTA1	Copy Number Public 20Q2	0.183
PLG	Copy Number Public 20Q2	0.182
PHOSPHO1	Copy Number Public 20Q2	-0.182
DYNLT1	Copy Number Public 20Q2	0.182
CDKN2B	Copy Number (Absolute)	0.183
CDKN2B-AS1	Copy Number (Absolute)	0.177
MYEOV	Copy Number (Absolute)	-0.176
CCND1	Copy Number (Absolute)	-0.172
CDKN2A-DT	Copy Number (Absolute)	0.169
CDKN2A	Copy Number (Absolute)	0.169
LTO1	Copy Number (Absolute)	-0.164
FGF19	Copy Number (Absolute)	-0.158
ANO1	Copy Number (Absolute)	-0.154
FGF3	Copy Number (Absolute)	-0.153
FGF4	Copy Number (Absolute)	-0.153
MRGPRF	Copy Number (Absolute)	-0.152
TPCN2	Copy Number (Absolute)	-0.151
MRGPRD	Copy Number (Absolute)	-0.15
FADD	Copy Number (Absolute)	-0.148
PPFIA1	Copy Number (Absolute)	-0.148
MIR548K	Copy Number (Absolute)	-0.148
NUP50-DT	Copy Number (Absolute)	-0.145
NUP50	Copy Number (Absolute)	-0.144
PDCD1LG2	Copy Number (Absolute)	0.144
RANBP6	Copy Number (Absolute)	0.143
MIR4665	Copy Number (Absolute)	0.143
RLN2	Copy Number (Absolute)	0.142
CTTN	Copy Number (Absolute)	-0.142
CD274	Copy Number (Absolute)	0.142
RIC1	Copy Number (Absolute)	0.142
RLN1	Copy Number (Absolute)	0.141
PLGRKT	Copy Number (Absolute)	0.141
IL33	Copy Number (Absolute)	0.141
ERMP1	Copy Number (Absolute)	0.139
MLANA	Copy Number (Absolute)	0.139
KIAA2026	Copy Number (Absolute)	0.139
TBC1D22A	Copy Number (Absolute)	-0.139
UHRF2	Copy Number (Absolute)	0.138
IGHMBP2	Copy Number (Absolute)	-0.138
MRPL21	Copy Number (Absolute)	-0.138
TPD52L3	Copy Number (Absolute)	0.137
INSL4	Copy Number (Absolute)	0.137
PTPRD	Copy Number (Absolute)	0.136
DMAC1	Copy Number (Absolute)	0.135
CDC37L1	Copy Number (Absolute)	0.135
PLPP6	Copy Number (Absolute)	0.135
C11orf24	Copy Number (Absolute)	-0.135
CERK	Copy Number (Absolute)	-0.135
INSL6	Copy Number (Absolute)	0.134
SHANK2	Copy Number (Absolute)	-0.134
GRAMD4	Copy Number (Absolute)	-0.134
GLDC	Copy Number (Absolute)	0.134
SULT4A1	Copy Number (Absolute)	-0.134
AK3	Copy Number (Absolute)	0.134
VLDLR-AS1	Copy Number (Absolute)	0.133
PMM1	Copy Number (Absolute)	-0.133
DESI1	Copy Number (Absolute)	-0.133
CSDC2	Copy Number (Absolute)	-0.133
XRCC6	Copy Number (Absolute)	-0.133
SNU13	Copy Number (Absolute)	-0.132
PNPLA3	Copy Number (Absolute)	-0.132
PARVB	Copy Number (Absolute)	-0.132
SAMM50	Copy Number (Absolute)	-0.132
PNPLA5	Copy Number (Absolute)	-0.132
SMARCA2	Copy Number (Absolute)	0.132
TCF20	Copy Number (Absolute)	-0.132
CYP2D7	Copy Number (Absolute)	-0.132
TRMT12	Copy Number (Absolute)	-0.131
SHISAL1	Copy Number (Absolute)	-0.131
PARVG	Copy Number (Absolute)	-0.131
VLDLR	Copy Number (Absolute)	0.131
PUM3	Copy Number (Absolute)	0.131
POLR3H	Copy Number (Absolute)	-0.131
JAK2	Copy Number (Absolute)	0.131
RCL1	Copy Number (Absolute)	0.131
KDM4C	Copy Number (Absolute)	0.131
C22orf46	Copy Number (Absolute)	-0.13
MEI1	Copy Number (Absolute)	-0.13
SPATA6L	Copy Number (Absolute)	0.13
CYP2D6	Copy Number (Absolute)	-0.13
GLIS3-AS1	Copy Number (Absolute)	0.13
KIAA0930	Copy Number (Absolute)	-0.13
MIR1249	Copy Number (Absolute)	-0.13
GLIS3	Copy Number (Absolute)	0.13
PHF21B	Copy Number (Absolute)	-0.13
FBXO32	Copy Number (Absolute)	-0.13
SHANK2-AS1	Copy Number (Absolute)	-0.13
SEPTIN3	Copy Number (Absolute)	-0.13
WBP2NL	Copy Number (Absolute)	-0.13
TEF	Copy Number (Absolute)	-0.13
SMC1B	Copy Number (Absolute)	-0.129
MIR101-2	Copy Number (Absolute)	0.129
LINC01239	Copy Number (Absolute)	0.129
TATDN1	Copy Number (Absolute)	-0.129
RNF139	Copy Number (Absolute)	-0.129
MTAP	Copy Number (Absolute)	0.129
CENPM	Copy Number (Absolute)	-0.129
LINC00634	Copy Number (Absolute)	-0.129
SMDT1	Copy Number (Absolute)	-0.128
NAGA	Copy Number (Absolute)	-0.128
NDUFA6	Copy Number (Absolute)	-0.128
PHETA2	Copy Number (Absolute)	-0.128
NDUFA6-DT	Copy Number (Absolute)	-0.128
MPPED1	Copy Number (Absolute)	-0.128
RB1	Mutation Public 20Q2	0.255
GALNTL5	Mutation Public 20Q2	0.155
BRAF	Mutation Public 20Q2	-0.153
MTF1	Mutation Public 20Q2	0.145
RUFY2	Mutation Public 20Q2	0.135
SYTL2	Mutation Public 20Q2	0.131
RAD21	Mutation Public 20Q2	0.127
SPAG17	Mutation Public 20Q2	0.127
TRIO	Mutation Public 20Q2	0.127
SLC25A37	Mutation Public 20Q2	0.125
TRIM67	Mutation Public 20Q2	0.124
KIF4A	Mutation Public 20Q2	0.124
HNRNPF	Mutation Public 20Q2	0.123
PAQR6	Mutation Public 20Q2	0.123
DEGS1	Mutation Public 20Q2	0.122
TP53	Mutation Public 20Q2	0.122
DRD2	Mutation Public 20Q2	0.122
UPK3BL1	Mutation Public 20Q2	0.122
ABCA3	Mutation Public 20Q2	0.121
CTXN2	Mutation Public 20Q2	-0.121
MEP1A	Mutation Public 20Q2	0.121
PTGS2	Mutation Public 20Q2	0.12
GOLGA8R	Mutation Public 20Q2	0.12
CDKN2A	Mutation Public 20Q2	-0.119
OCRL	Mutation Public 20Q2	0.119
MYRIP	Mutation Public 20Q2	0.119
EPHA5	Mutation Public 20Q2	0.118
DYNC1LI1	Mutation Public 20Q2	0.118
LIPE	Mutation Public 20Q2	0.118
ZNF296	Mutation Public 20Q2	-0.118
REG1A	Mutation Public 20Q2	0.117
SDE2	Mutation Public 20Q2	0.117
MEMO1	Mutation Public 20Q2	0.117
KIF20A	Mutation Public 20Q2	-0.117
GTF2H3	Mutation Public 20Q2	-0.117
AGA	Mutation Public 20Q2	0.116
RASA3	Mutation Public 20Q2	0.116
PLAA	Mutation Public 20Q2	0.115
IGLL5	Mutation Public 20Q2	0.115
CYB5R2	Mutation Public 20Q2	0.114
TDRKH	Mutation Public 20Q2	0.114
GOLGA1	Mutation Public 20Q2	0.114
MTHFD1L	Mutation Public 20Q2	0.114
GOLGA8IP	Mutation Public 20Q2	0.113
FBXO32	Mutation Public 20Q2	0.113
SNRNP200	Mutation Public 20Q2	0.113
SH3BGRL3	Mutation Public 20Q2	-0.113
MAF	Mutation Public 20Q2	0.112
TGIF2LX	Mutation Public 20Q2	0.112
EYA4	Mutation Public 20Q2	0.112
MYO6	Mutation Public 20Q2	0.112
LIPA	Mutation Public 20Q2	0.111
STAC	Mutation Public 20Q2	-0.111
HADHA	Mutation Public 20Q2	0.111
AQR	Mutation Public 20Q2	0.111
THAP1	Mutation Public 20Q2	-0.11
GLT1D1	Mutation Public 20Q2	0.11
DLG2	Mutation Public 20Q2	0.11
LRRC56	Mutation Public 20Q2	0.11
GOT2	Mutation Public 20Q2	0.109
BIRC2	Mutation Public 20Q2	0.109
STAT2	Mutation Public 20Q2	-0.108
FSCB	Mutation Public 20Q2	0.108
NT5C2	Mutation Public 20Q2	0.108
H3C1	Mutation Public 20Q2	-0.108
GARNL3	Mutation Public 20Q2	0.107
NPIPB3	Mutation Public 20Q2	0.107
FDFT1	Mutation Public 20Q2	0.107
SH3TC1	Mutation Public 20Q2	0.107
IL18RAP	Mutation Public 20Q2	0.107
ARFIP2	Mutation Public 20Q2	0.107
ATXN1	Mutation Public 20Q2	0.107
FADS3	Mutation Public 20Q2	-0.106
PPP1R12A	Mutation Public 20Q2	0.106
C20orf194	Mutation Public 20Q2	0.106
CCND1	Mutation Public 20Q2	-0.106
SUCLG2	Mutation Public 20Q2	-0.106
RARB	Mutation Public 20Q2	0.106
CALHM1	Mutation Public 20Q2	0.106
TSPAN5	Mutation Public 20Q2	0.106
MSH6	Mutation Public 20Q2	0.105
ZCCHC8	Mutation Public 20Q2	0.105
ABCA2	Mutation Public 20Q2	0.105
TRAT1	Mutation Public 20Q2	0.105
CCNDBP1	Mutation Public 20Q2	-0.104
PNN	Mutation Public 20Q2	0.104
KIF17	Mutation Public 20Q2	0.104
RNF169	Mutation Public 20Q2	-0.104
MAP3K1	Mutation Public 20Q2	0.104
FUS	Mutation Public 20Q2	0.104
LMO4	Mutation Public 20Q2	0.104
DIS3	Mutation Public 20Q2	0.104
CCDC97	Mutation Public 20Q2	0.104
ARNT	Mutation Public 20Q2	-0.104
KCNH4	Mutation Public 20Q2	0.104
USH2A	Mutation Public 20Q2	0.103
OTOP1	Mutation Public 20Q2	0.103
SLC26A8	Mutation Public 20Q2	-0.103
TCEA3	Mutation Public 20Q2	0.102
PLA2G3	Mutation Public 20Q2	0.102

## Sheet: CCND2
Gene/Compound	Dataset	Correlation
IRF4	CRISPR (Avana) Public 20Q2	0.423
POU2AF1	CRISPR (Avana) Public 20Q2	0.327
NFKB1	CRISPR (Avana) Public 20Q2	0.315
MEF2C	CRISPR (Avana) Public 20Q2	0.309
PRDM1	CRISPR (Avana) Public 20Q2	0.307
NFKB2	CRISPR (Avana) Public 20Q2	0.307
PIM2	CRISPR (Avana) Public 20Q2	0.299
IKBKB	CRISPR (Avana) Public 20Q2	0.293
ARHGAP45	CRISPR (Avana) Public 20Q2	0.283
RELB	CRISPR (Avana) Public 20Q2	0.275
TCF3	CRISPR (Avana) Public 20Q2	0.27
MTA2	CRISPR (Avana) Public 20Q2	0.264
CDK6	CRISPR (Avana) Public 20Q2	0.261
MAF	CRISPR (Avana) Public 20Q2	0.256
SMAD7	CRISPR (Avana) Public 20Q2	0.248
ZBTB38	CRISPR (Avana) Public 20Q2	0.245
CHUK	CRISPR (Avana) Public 20Q2	0.242
HERPUD1	CRISPR (Avana) Public 20Q2	0.237
IRS1	CRISPR (Avana) Public 20Q2	0.236
CCND1	CRISPR (Avana) Public 20Q2	-0.235
FURIN	CRISPR (Avana) Public 20Q2	0.234
AMMECR1	CRISPR (Avana) Public 20Q2	-0.22
GTF2H1	CRISPR (Avana) Public 20Q2	0.215
ATXN7	CRISPR (Avana) Public 20Q2	0.212
C12orf4	CRISPR (Avana) Public 20Q2	0.212
IKZF1	CRISPR (Avana) Public 20Q2	0.21
BATF3	CRISPR (Avana) Public 20Q2	0.208
PSMB1	CRISPR (Avana) Public 20Q2	0.206
MLLT10	CRISPR (Avana) Public 20Q2	0.205
MED10	CRISPR (Avana) Public 20Q2	0.203
CPEB4	CRISPR (Avana) Public 20Q2	0.203
AFF1	CRISPR (Avana) Public 20Q2	0.202
BATF	CRISPR (Avana) Public 20Q2	0.201
SPC24	CRISPR (Avana) Public 20Q2	0.199
SYVN1	CRISPR (Avana) Public 20Q2	0.198
MANF	CRISPR (Avana) Public 20Q2	0.196
RPL34	CRISPR (Avana) Public 20Q2	0.196
ZNF592	CRISPR (Avana) Public 20Q2	0.195
HSPA5	CRISPR (Avana) Public 20Q2	0.195
TGDS	CRISPR (Avana) Public 20Q2	0.194
CDX2	CRISPR (Avana) Public 20Q2	0.194
BCAS2	CRISPR (Avana) Public 20Q2	0.193
KDM5C	CRISPR (Avana) Public 20Q2	0.193
RPS29	CRISPR (Avana) Public 20Q2	0.192
ZNF296	CRISPR (Avana) Public 20Q2	0.192
ERH	CRISPR (Avana) Public 20Q2	0.191
LSM12	CRISPR (Avana) Public 20Q2	0.19
IKZF3	CRISPR (Avana) Public 20Q2	0.188
MBD2	CRISPR (Avana) Public 20Q2	0.187
TAF13	CRISPR (Avana) Public 20Q2	0.187
MCL1	CRISPR (Avana) Public 20Q2	0.184
PSMC1	CRISPR (Avana) Public 20Q2	0.184
FGF23	CRISPR (Avana) Public 20Q2	0.183
LTA4H	CRISPR (Avana) Public 20Q2	-0.183
C19orf53	CRISPR (Avana) Public 20Q2	-0.182
CNOT7	CRISPR (Avana) Public 20Q2	-0.18
CTBP1	CRISPR (Avana) Public 20Q2	0.179
TADA2B	CRISPR (Avana) Public 20Q2	0.177
TAF10	CRISPR (Avana) Public 20Q2	0.176
ZMYND8	CRISPR (Avana) Public 20Q2	0.175
PRKAA1	CRISPR (Avana) Public 20Q2	0.174
PPP2R1A	CRISPR (Avana) Public 20Q2	-0.174
IL10	CRISPR (Avana) Public 20Q2	0.174
RMND5B	CRISPR (Avana) Public 20Q2	-0.173
MARCHF5	CRISPR (Avana) Public 20Q2	0.173
ZNF217	CRISPR (Avana) Public 20Q2	0.173
KCTD11	CRISPR (Avana) Public 20Q2	-0.173
TAF11	CRISPR (Avana) Public 20Q2	0.172
SRP19	CRISPR (Avana) Public 20Q2	0.172
NSFL1C	CRISPR (Avana) Public 20Q2	0.172
ARRDC3	CRISPR (Avana) Public 20Q2	-0.17
TTLL7	CRISPR (Avana) Public 20Q2	-0.17
TEAD1	CRISPR (Avana) Public 20Q2	-0.17
SEL1L	CRISPR (Avana) Public 20Q2	0.169
PSMB7	CRISPR (Avana) Public 20Q2	-0.169
IGF1R	CRISPR (Avana) Public 20Q2	0.169
ITPK1	CRISPR (Avana) Public 20Q2	0.168
SLC20A1	CRISPR (Avana) Public 20Q2	0.167
SART1	CRISPR (Avana) Public 20Q2	0.167
SETD5	CRISPR (Avana) Public 20Q2	-0.167
IRF2	CRISPR (Avana) Public 20Q2	0.166
SNRNP200	CRISPR (Avana) Public 20Q2	0.166
MRGBP	CRISPR (Avana) Public 20Q2	0.166
NDUFB5	CRISPR (Avana) Public 20Q2	-0.166
STK17B	CRISPR (Avana) Public 20Q2	0.166
TADA1	CRISPR (Avana) Public 20Q2	0.165
MIER3	CRISPR (Avana) Public 20Q2	0.165
TAF5L	CRISPR (Avana) Public 20Q2	0.164
GPA33	CRISPR (Avana) Public 20Q2	0.164
TENT5C	CRISPR (Avana) Public 20Q2	-0.164
PSMA3	CRISPR (Avana) Public 20Q2	0.164
COG4	CRISPR (Avana) Public 20Q2	0.164
ATXN2L	CRISPR (Avana) Public 20Q2	0.163
AKIRIN2	CRISPR (Avana) Public 20Q2	0.163
MED19	CRISPR (Avana) Public 20Q2	0.163
PSMA5	CRISPR (Avana) Public 20Q2	0.163
GTF2H5	CRISPR (Avana) Public 20Q2	0.163
NSUN3	CRISPR (Avana) Public 20Q2	-0.163
TTBK2	CRISPR (Avana) Public 20Q2	0.162
GNL3	CRISPR (Avana) Public 20Q2	-0.162
CCND2	Expression Public 20Q2	-0.595
CD28	Expression Public 20Q2	-0.442
CCL3	Expression Public 20Q2	-0.428
TNFRSF17	Expression Public 20Q2	-0.416
TNFRSF13B	Expression Public 20Q2	-0.407
CD48	Expression Public 20Q2	-0.393
ZBP1	Expression Public 20Q2	-0.38
P2RY10	Expression Public 20Q2	-0.377
IRF4	Expression Public 20Q2	-0.368
CORO1B	Expression Public 20Q2	0.364
ENAM	Expression Public 20Q2	-0.364
ITGB7	Expression Public 20Q2	-0.364
IGLL5	Expression Public 20Q2	-0.353
CCL3L3	Expression Public 20Q2	-0.351
LAX1	Expression Public 20Q2	-0.349
JCHAIN	Expression Public 20Q2	-0.348
UNC13C	Expression Public 20Q2	-0.348
TIGIT	Expression Public 20Q2	-0.342
PRDM1	Expression Public 20Q2	-0.34
RAB13	Expression Public 20Q2	0.34
CEACAM21	Expression Public 20Q2	-0.338
MZB1	Expression Public 20Q2	-0.336
PIM2	Expression Public 20Q2	-0.335
CYTIP	Expression Public 20Q2	-0.331
IL10RA	Expression Public 20Q2	-0.326
ARID5A	Expression Public 20Q2	-0.324
PTK2	Expression Public 20Q2	0.323
CXCR3	Expression Public 20Q2	-0.32
XCR1	Expression Public 20Q2	-0.319
IL2RG	Expression Public 20Q2	-0.317
LY9	Expression Public 20Q2	-0.315
JSRP1	Expression Public 20Q2	-0.31
LTA	Expression Public 20Q2	-0.31
IKZF3	Expression Public 20Q2	-0.309
MORC1	Expression Public 20Q2	-0.308
ZC2HC1B	Expression Public 20Q2	-0.303
LEFTY2	Expression Public 20Q2	-0.302
ERN1	Expression Public 20Q2	-0.299
POU2AF1	Expression Public 20Q2	-0.299
KCNN3	Expression Public 20Q2	-0.299
FBXO40	Expression Public 20Q2	-0.298
SELPLG	Expression Public 20Q2	-0.297
LAPTM4B	Expression Public 20Q2	0.296
OBSL1	Expression Public 20Q2	0.295
IL21R	Expression Public 20Q2	-0.292
RGS1	Expression Public 20Q2	-0.291
LRRC14B	Expression Public 20Q2	-0.291
TRAF3IP3	Expression Public 20Q2	-0.29
CCND1	Expression Public 20Q2	0.29
SLAMF7	Expression Public 20Q2	-0.288
DUSP22	Expression Public 20Q2	-0.287
INHBC	Expression Public 20Q2	-0.284
THEMIS	Expression Public 20Q2	-0.284
LSP1	Expression Public 20Q2	-0.281
CTBP2	Expression Public 20Q2	0.28
GOLGA8S	Expression Public 20Q2	-0.28
VAT1	Expression Public 20Q2	0.279
NECTIN2	Expression Public 20Q2	0.278
PIP5K1B	Expression Public 20Q2	-0.278
HLA-DQA2	Expression Public 20Q2	-0.278
CCR1	Expression Public 20Q2	-0.277
CHIT1	Expression Public 20Q2	-0.276
CTNND1	Expression Public 20Q2	0.274
ASPH	Expression Public 20Q2	0.274
NCKAP5L	Expression Public 20Q2	0.274
ZNF629	Expression Public 20Q2	0.272
NIBAN2	Expression Public 20Q2	0.272
CCR3	Expression Public 20Q2	-0.272
ERMN	Expression Public 20Q2	-0.271
RASAL3	Expression Public 20Q2	-0.271
CDR2L	Expression Public 20Q2	0.269
HLA-DQA1	Expression Public 20Q2	-0.269
SYCP3	Expression Public 20Q2	-0.268
GPRIN3	Expression Public 20Q2	-0.268
HK1	Expression Public 20Q2	0.267
RBFOX2	Expression Public 20Q2	0.266
KIF21B	Expression Public 20Q2	-0.265
AMPD1	Expression Public 20Q2	-0.265
ACTN1	Expression Public 20Q2	0.264
CRYBB1	Expression Public 20Q2	-0.264
CXorf21	Expression Public 20Q2	-0.263
MTSS2	Expression Public 20Q2	0.262
RASGRP3	Expression Public 20Q2	-0.261
ABCD2	Expression Public 20Q2	-0.26
TMEM132A	Expression Public 20Q2	0.26
NAT14	Expression Public 20Q2	0.259
GNAQ	Expression Public 20Q2	0.259
ARHGAP30	Expression Public 20Q2	-0.259
SSTR3	Expression Public 20Q2	-0.259
IL12RB1	Expression Public 20Q2	-0.259
TUBB3	Expression Public 20Q2	0.258
KCNA3	Expression Public 20Q2	-0.258
BAIAP2	Expression Public 20Q2	0.257
IZUMO4	Expression Public 20Q2	-0.257
MEF2C	Expression Public 20Q2	-0.257
TENT5C	Expression Public 20Q2	-0.256
TGIF1	Expression Public 20Q2	0.254
TMC8	Expression Public 20Q2	-0.254
UTS2R	Expression Public 20Q2	-0.253
GAS2L1	Expression Public 20Q2	0.252
MIR6500	Copy Number Public 20Q2	0.22
MIR4421	Copy Number Public 20Q2	0.22
C1orf185	Copy Number Public 20Q2	0.212
CDKN2C	Copy Number Public 20Q2	0.206
VANGL1	Copy Number Public 20Q2	0.162
CASQ2	Copy Number Public 20Q2	0.162
POU2F1	Copy Number Public 20Q2	-0.161
LINC01363	Copy Number Public 20Q2	-0.161
CD247	Copy Number Public 20Q2	-0.16
PRPF38B	Copy Number Public 20Q2	0.159
DUSP27	Copy Number Public 20Q2	-0.158
CREG1	Copy Number Public 20Q2	-0.157
MAB21L3	Copy Number Public 20Q2	0.157
MIR320B1	Copy Number Public 20Q2	0.157
FNDC7	Copy Number Public 20Q2	0.157
TMCO1	Copy Number Public 20Q2	-0.157
TMCO1-AS1	Copy Number Public 20Q2	-0.157
SPATA42	Copy Number Public 20Q2	0.156
GPSM2	Copy Number Public 20Q2	0.156
SLC22A15	Copy Number Public 20Q2	0.156
NHLH2	Copy Number Public 20Q2	0.156
LINC01649	Copy Number Public 20Q2	0.156
SLC16A4	Copy Number Public 20Q2	0.156
AKNAD1	Copy Number Public 20Q2	0.156
ALDH9A1	Copy Number Public 20Q2	-0.156
MIR3658	Copy Number Public 20Q2	-0.156
ATP1A1-AS1	Copy Number Public 20Q2	0.155
TSHB	Copy Number Public 20Q2	0.155
LINC01762	Copy Number Public 20Q2	0.155
UCK2	Copy Number Public 20Q2	-0.155
KCNC4	Copy Number Public 20Q2	0.155
LINC02586	Copy Number Public 20Q2	0.155
RBM15	Copy Number Public 20Q2	0.155
SLC6A17	Copy Number Public 20Q2	0.155
MAEL	Copy Number Public 20Q2	-0.155
WDR47	Copy Number Public 20Q2	0.154
STXBP3	Copy Number Public 20Q2	0.154
GPA33	Copy Number Public 20Q2	-0.154
CD58	Copy Number Public 20Q2	0.154
CLCC1	Copy Number Public 20Q2	0.154
RXRG	Copy Number Public 20Q2	-0.154
MGST3	Copy Number Public 20Q2	-0.154
IGSF3	Copy Number Public 20Q2	0.154
MIR548AC	Copy Number Public 20Q2	0.154
LRRC52	Copy Number Public 20Q2	-0.153
LRRC52-AS1	Copy Number Public 20Q2	-0.153
AKR7A2P1	Copy Number Public 20Q2	0.153
LMX1A	Copy Number Public 20Q2	-0.153
SLC16A1	Copy Number Public 20Q2	0.153
CTTNBP2NL	Copy Number Public 20Q2	0.153
LAMTOR5	Copy Number Public 20Q2	0.153
LAMTOR5-AS1	Copy Number Public 20Q2	0.153
PROK1	Copy Number Public 20Q2	0.153
CYMP	Copy Number Public 20Q2	0.153
CAPZA1	Copy Number Public 20Q2	0.153
FAM78B	Copy Number Public 20Q2	-0.153
MIR921	Copy Number Public 20Q2	-0.153
ST7L	Copy Number Public 20Q2	0.152
LINC01356	Copy Number Public 20Q2	0.152
MOV10	Copy Number Public 20Q2	0.152
RHOC	Copy Number Public 20Q2	0.152
PPM1J	Copy Number Public 20Q2	0.152
TAFA3	Copy Number Public 20Q2	0.152
MIR4256	Copy Number Public 20Q2	0.152
WNT2B	Copy Number Public 20Q2	0.152
SLC16A1-AS1	Copy Number Public 20Q2	0.152
RBM15-AS1	Copy Number Public 20Q2	0.151
NGF	Copy Number Public 20Q2	0.15
NGF-AS1	Copy Number Public 20Q2	0.15
PHTF1	Copy Number Public 20Q2	0.15
TSPAN2	Copy Number Public 20Q2	0.15
MAGI3	Copy Number Public 20Q2	0.15
OLFML3	Copy Number Public 20Q2	0.149
SFT2D2	Copy Number Public 20Q2	-0.149
GPR161	Copy Number Public 20Q2	-0.149
TIPRL	Copy Number Public 20Q2	-0.149
ANKRD36BP1	Copy Number Public 20Q2	-0.149
TBX19	Copy Number Public 20Q2	-0.149
SYT6	Copy Number Public 20Q2	0.149
HENMT1	Copy Number Public 20Q2	0.149
RSBN1	Copy Number Public 20Q2	0.149
MIR1255B2	Copy Number Public 20Q2	-0.149
DCAF6	Copy Number Public 20Q2	-0.149
MPC2	Copy Number Public 20Q2	-0.149
ADCY10	Copy Number Public 20Q2	-0.149
PTPN22	Copy Number Public 20Q2	0.149
AP4B1-AS1	Copy Number Public 20Q2	0.149
AP4B1	Copy Number Public 20Q2	0.149
BCL2L15	Copy Number Public 20Q2	0.149
DCLRE1B	Copy Number Public 20Q2	0.149
CTSK	Copy Number Public 20Q2	-0.149
PTGFRN	Copy Number Public 20Q2	0.149
RCSD1	Copy Number Public 20Q2	-0.148
MPZL1	Copy Number Public 20Q2	-0.148
CDKN2B	Copy Number Public 20Q2	-0.148
THEG	Copy Number Public 20Q2	-0.148
C2CD4C	Copy Number Public 20Q2	-0.148
TTF2	Copy Number Public 20Q2	0.148
TRIM45	Copy Number Public 20Q2	0.148
VTCN1	Copy Number Public 20Q2	0.148
CTSK	Copy Number (Absolute)	-0.164
HORMAD1	Copy Number (Absolute)	-0.159
CTSS	Copy Number (Absolute)	-0.159
FAM78B	Copy Number (Absolute)	-0.157
MIR921	Copy Number (Absolute)	-0.157
GOLPH3L	Copy Number (Absolute)	-0.157
ADAMTSL4	Copy Number (Absolute)	-0.157
MCL1	Copy Number (Absolute)	-0.157
ENSA	Copy Number (Absolute)	-0.157
MIR4257	Copy Number (Absolute)	-0.157
HYDIN2	Copy Number (Absolute)	-0.155
ALDH9A1	Copy Number (Absolute)	-0.154
TMCO1	Copy Number (Absolute)	-0.154
NOTCH2NLA	Copy Number (Absolute)	-0.154
NBPF10	Copy Number (Absolute)	-0.154
UCK2	Copy Number (Absolute)	-0.153
MIR3658	Copy Number (Absolute)	-0.151
LRRC52	Copy Number (Absolute)	-0.151
LRRC52-AS1	Copy Number (Absolute)	-0.151
RXRG	Copy Number (Absolute)	-0.15
MGST3	Copy Number (Absolute)	-0.15
H2BC20P	Copy Number (Absolute)	-0.149
SF3B4	Copy Number (Absolute)	-0.149
MTMR11	Copy Number (Absolute)	-0.149
H2AC21	Copy Number (Absolute)	-0.149
H2BC21	Copy Number (Absolute)	-0.149
BOLA1	Copy Number (Absolute)	-0.149
OTUD7B	Copy Number (Absolute)	-0.149
SV2A	Copy Number (Absolute)	-0.149
H2AC20	Copy Number (Absolute)	-0.149
LMX1A	Copy Number (Absolute)	-0.149
LINC00869	Copy Number (Absolute)	-0.148
RPRD2	Copy Number (Absolute)	-0.148
DUSP27	Copy Number (Absolute)	-0.148
POU2F1	Copy Number (Absolute)	-0.148
PBX1	Copy Number (Absolute)	-0.148
FMO9P	Copy Number (Absolute)	-0.147
HJV	Copy Number (Absolute)	-0.147
H3C13	Copy Number (Absolute)	-0.147
FCGR1A	Copy Number (Absolute)	-0.147
GPR89A	Copy Number (Absolute)	-0.147
PDZK1	Copy Number (Absolute)	-0.147
NBPF11	Copy Number (Absolute)	-0.147
CD160	Copy Number (Absolute)	-0.147
PIAS3	Copy Number (Absolute)	-0.146
ANKRD35	Copy Number (Absolute)	-0.146
GNRHR2	Copy Number (Absolute)	-0.146
POLR3C	Copy Number (Absolute)	-0.146
NUDT17	Copy Number (Absolute)	-0.146
PEX11B	Copy Number (Absolute)	-0.146
RBM8A	Copy Number (Absolute)	-0.146
ITGA10	Copy Number (Absolute)	-0.146
POGK	Copy Number (Absolute)	-0.146
TADA1	Copy Number (Absolute)	-0.146
MAEL	Copy Number (Absolute)	-0.146
ILDR2	Copy Number (Absolute)	-0.146
GPA33	Copy Number (Absolute)	-0.146
APCS	Copy Number (Absolute)	-0.146
OR10J5	Copy Number (Absolute)	-0.146
RNF115	Copy Number (Absolute)	-0.146
OR10J1	Copy Number (Absolute)	-0.145
MPC2	Copy Number (Absolute)	-0.145
ADCY10	Copy Number (Absolute)	-0.145
DCAF6	Copy Number (Absolute)	-0.145
SETDB1	Copy Number (Absolute)	-0.145
MPZL1	Copy Number (Absolute)	-0.145
ANXA9	Copy Number (Absolute)	-0.145
PRUNE1	Copy Number (Absolute)	-0.145
MINDY1	Copy Number (Absolute)	-0.145
CERS2	Copy Number (Absolute)	-0.145
BNIPL	Copy Number (Absolute)	-0.145
CRP	Copy Number (Absolute)	-0.144
CFAP45	Copy Number (Absolute)	-0.144
SNHG28	Copy Number (Absolute)	-0.144
FCRL6	Copy Number (Absolute)	-0.144
VSIG8	Copy Number (Absolute)	-0.144
DUSP23	Copy Number (Absolute)	-0.144
SLAMF8	Copy Number (Absolute)	-0.144
TAGLN2	Copy Number (Absolute)	-0.144
POLR3GL	Copy Number (Absolute)	-0.144
ANKRD34A	Copy Number (Absolute)	-0.144
LIX1L	Copy Number (Absolute)	-0.144
TXNIP	Copy Number (Absolute)	-0.144
PRPF3	Copy Number (Absolute)	-0.144
VPS45	Copy Number (Absolute)	-0.144
ARNT	Copy Number (Absolute)	-0.144
OR10R2	Copy Number (Absolute)	-0.143
OR10K1	Copy Number (Absolute)	-0.143
OR6Y1	Copy Number (Absolute)	-0.143
OR6P1	Copy Number (Absolute)	-0.143
CADM3	Copy Number (Absolute)	-0.143
ACKR1	Copy Number (Absolute)	-0.143
CADM3-AS1	Copy Number (Absolute)	-0.143
TARS2	Copy Number (Absolute)	-0.143
ECM1	Copy Number (Absolute)	-0.143
FALEC	Copy Number (Absolute)	-0.143
OR6N2	Copy Number (Absolute)	-0.143
MNDA	Copy Number (Absolute)	-0.143
OR6N1	Copy Number (Absolute)	-0.142
AIM2	Copy Number (Absolute)	-0.142
COA5	Mutation Public 20Q2	-0.259
GNG12	Mutation Public 20Q2	-0.258
MCFD2	Mutation Public 20Q2	-0.22
RFTN1	Mutation Public 20Q2	-0.199
CDKN2D	Mutation Public 20Q2	-0.186
IDNK	Mutation Public 20Q2	-0.185
VPREB3	Mutation Public 20Q2	-0.184
SEM1	Mutation Public 20Q2	-0.184
FAM106A	Mutation Public 20Q2	-0.184
SPDYE2B	Mutation Public 20Q2	-0.182
APOC2	Mutation Public 20Q2	-0.182
MRTO4	Mutation Public 20Q2	-0.181
TRIM73	Mutation Public 20Q2	-0.181
KRTAP4-4	Mutation Public 20Q2	-0.179
TENT5C	Mutation Public 20Q2	-0.179
TMEM251	Mutation Public 20Q2	-0.178
ARHGAP9	Mutation Public 20Q2	-0.177
IQSEC1	Mutation Public 20Q2	-0.168
TRAF3	Mutation Public 20Q2	-0.157
TMEM169	Mutation Public 20Q2	-0.154
H2BC12	Mutation Public 20Q2	-0.154
PLSCR1	Mutation Public 20Q2	-0.154
ATP6V1F	Mutation Public 20Q2	-0.149
RPL24	Mutation Public 20Q2	-0.148
C10orf105	Mutation Public 20Q2	-0.148
ZFYVE19	Mutation Public 20Q2	-0.145
RGS5	Mutation Public 20Q2	-0.144
POLR1E	Mutation Public 20Q2	-0.144
NDP	Mutation Public 20Q2	-0.141
TMEM52B	Mutation Public 20Q2	-0.14
ITGA11	Mutation Public 20Q2	-0.14
MMP28	Mutation Public 20Q2	-0.139
SLC7A6OS	Mutation Public 20Q2	-0.139
C5AR1	Mutation Public 20Q2	-0.139
TMEM170B	Mutation Public 20Q2	-0.138
C6orf141	Mutation Public 20Q2	-0.137
RNF7	Mutation Public 20Q2	-0.133
PRAMEF13	Mutation Public 20Q2	-0.133
OLIG1	Mutation Public 20Q2	-0.132
BNIP2	Mutation Public 20Q2	-0.131
TXN	Mutation Public 20Q2	-0.129
PNKP	Mutation Public 20Q2	-0.128
ZFP41	Mutation Public 20Q2	-0.128
OR1D5	Mutation Public 20Q2	-0.127
ZPBP2	Mutation Public 20Q2	-0.127
SLC25A1	Mutation Public 20Q2	-0.126
FGF22	Mutation Public 20Q2	-0.125
SKP2	Mutation Public 20Q2	-0.125
C3orf67	Mutation Public 20Q2	-0.123
CALCOCO2	Mutation Public 20Q2	-0.123
ATP2C2	Mutation Public 20Q2	-0.123
DUSP22	Mutation Public 20Q2	-0.122
IGLL1	Mutation Public 20Q2	-0.122
IFNA7	Mutation Public 20Q2	-0.122
ACBD4	Mutation Public 20Q2	-0.121
MZT1	Mutation Public 20Q2	-0.121
LONRF3	Mutation Public 20Q2	-0.121
KRTAP4-1	Mutation Public 20Q2	-0.12
GTSCR1	Mutation Public 20Q2	-0.12
ASF1B	Mutation Public 20Q2	-0.119
SAYSD1	Mutation Public 20Q2	-0.117
ZNF24	Mutation Public 20Q2	-0.117
LTB	Mutation Public 20Q2	-0.117
SMR3A	Mutation Public 20Q2	-0.116
UTS2B	Mutation Public 20Q2	-0.116
C4orf47	Mutation Public 20Q2	-0.115
GAS2L2	Mutation Public 20Q2	-0.115
FBXL8	Mutation Public 20Q2	-0.115
ARHGAP21	Mutation Public 20Q2	-0.114
KLRK1	Mutation Public 20Q2	-0.114
SPINK1	Mutation Public 20Q2	-0.114
UBE2T	Mutation Public 20Q2	-0.114
TMED1	Mutation Public 20Q2	-0.113
ASPH	Mutation Public 20Q2	-0.113
SPDYE4	Mutation Public 20Q2	-0.112
DNAJB12	Mutation Public 20Q2	-0.112
TPPP	Mutation Public 20Q2	-0.112
FAM160A1	Mutation Public 20Q2	-0.112
BZW2	Mutation Public 20Q2	-0.112
DUSP2	Mutation Public 20Q2	-0.111
PRR11	Mutation Public 20Q2	-0.111
OFCC1	Mutation Public 20Q2	-0.111
NDUFS5	Mutation Public 20Q2	-0.11
APOBEC2	Mutation Public 20Q2	-0.109
PDIA5	Mutation Public 20Q2	-0.109
RARRES2	Mutation Public 20Q2	-0.109
PSMD14	Mutation Public 20Q2	-0.109
SMAD1	Mutation Public 20Q2	-0.109
MTHFSD	Mutation Public 20Q2	-0.109
AK8	Mutation Public 20Q2	-0.108
EEA1	Mutation Public 20Q2	-0.108
FBXO44	Mutation Public 20Q2	-0.108
TTLL3	Mutation Public 20Q2	-0.108
GPC5	Mutation Public 20Q2	-0.108
NPIPB11	Mutation Public 20Q2	-0.107
SPINK13	Mutation Public 20Q2	-0.107
HACE1	Mutation Public 20Q2	-0.107
MARCHF7	Mutation Public 20Q2	-0.106
NSUN3	Mutation Public 20Q2	-0.106
RFX1	Mutation Public 20Q2	-0.105

## Sheet: CCND3
Gene/Compound	Dataset	Correlation
CDK6	CRISPR (Avana) Public 20Q2	0.43
MYB	CRISPR (Avana) Public 20Q2	0.377
PSMB5	CRISPR (Avana) Public 20Q2	-0.272
GCLC	CRISPR (Avana) Public 20Q2	0.261
SLC5A3	CRISPR (Avana) Public 20Q2	0.257
GFI1	CRISPR (Avana) Public 20Q2	0.249
SLC20A1	CRISPR (Avana) Public 20Q2	0.235
ATP1B3	CRISPR (Avana) Public 20Q2	0.231
CBFB	CRISPR (Avana) Public 20Q2	0.222
IKZF1	CRISPR (Avana) Public 20Q2	0.221
CDC16	CRISPR (Avana) Public 20Q2	0.21
RHOA	CRISPR (Avana) Public 20Q2	0.209
NAE1	CRISPR (Avana) Public 20Q2	-0.208
WSB1	CRISPR (Avana) Public 20Q2	0.208
CLDN3	CRISPR (Avana) Public 20Q2	0.208
RUNX1	CRISPR (Avana) Public 20Q2	0.207
CDKN1B	CRISPR (Avana) Public 20Q2	-0.202
C20orf96	CRISPR (Avana) Public 20Q2	0.201
LDLRAP1	CRISPR (Avana) Public 20Q2	0.201
HIKESHI	CRISPR (Avana) Public 20Q2	-0.199
LMO2	CRISPR (Avana) Public 20Q2	0.198
AP1M1	CRISPR (Avana) Public 20Q2	0.197
PAX5	CRISPR (Avana) Public 20Q2	0.197
STK11	CRISPR (Avana) Public 20Q2	0.196
ALAD	CRISPR (Avana) Public 20Q2	0.196
ADIPOR2	CRISPR (Avana) Public 20Q2	0.195
CCNT1	CRISPR (Avana) Public 20Q2	0.194
GSS	CRISPR (Avana) Public 20Q2	0.193
PPCDC	CRISPR (Avana) Public 20Q2	0.193
ALAS1	CRISPR (Avana) Public 20Q2	0.193
MYC	CRISPR (Avana) Public 20Q2	0.192
TAZ	CRISPR (Avana) Public 20Q2	0.19
SPI1	CRISPR (Avana) Public 20Q2	0.189
EBF1	CRISPR (Avana) Public 20Q2	0.188
OR2T29	CRISPR (Avana) Public 20Q2	0.186
AMBRA1	CRISPR (Avana) Public 20Q2	-0.185
IRF8	CRISPR (Avana) Public 20Q2	0.183
ARHGAP45	CRISPR (Avana) Public 20Q2	0.18
MICU1	CRISPR (Avana) Public 20Q2	0.18
TMEM189	CRISPR (Avana) Public 20Q2	0.18
FAR1	CRISPR (Avana) Public 20Q2	0.178
NCKAP1L	CRISPR (Avana) Public 20Q2	0.177
RPL23A	CRISPR (Avana) Public 20Q2	0.176
NFE2L2	CRISPR (Avana) Public 20Q2	0.176
FBXO7	CRISPR (Avana) Public 20Q2	0.175
UMPS	CRISPR (Avana) Public 20Q2	0.174
MIOS	CRISPR (Avana) Public 20Q2	0.173
GTF2H5	CRISPR (Avana) Public 20Q2	0.173
UROS	CRISPR (Avana) Public 20Q2	0.173
GBX1	CRISPR (Avana) Public 20Q2	0.173
RPLP2	CRISPR (Avana) Public 20Q2	0.172
WNK1	CRISPR (Avana) Public 20Q2	0.17
FCHO2	CRISPR (Avana) Public 20Q2	-0.17
THAP1	CRISPR (Avana) Public 20Q2	-0.168
NMNAT1	CRISPR (Avana) Public 20Q2	0.167
HTRA2	CRISPR (Avana) Public 20Q2	0.167
METAP1	CRISPR (Avana) Public 20Q2	-0.166
SIK3	CRISPR (Avana) Public 20Q2	0.166
TINF2	CRISPR (Avana) Public 20Q2	0.166
GPR31	CRISPR (Avana) Public 20Q2	0.164
ATP6V0A2	CRISPR (Avana) Public 20Q2	0.164
DOCK2	CRISPR (Avana) Public 20Q2	0.163
GUCA1A	CRISPR (Avana) Public 20Q2	0.162
PRICKLE4	CRISPR (Avana) Public 20Q2	0.162
MEIOC	CRISPR (Avana) Public 20Q2	-0.162
EP300	CRISPR (Avana) Public 20Q2	0.161
ZEB2	CRISPR (Avana) Public 20Q2	0.161
UBA3	CRISPR (Avana) Public 20Q2	-0.16
MAEA	CRISPR (Avana) Public 20Q2	-0.16
ATP6V1G1	CRISPR (Avana) Public 20Q2	0.16
RER1	CRISPR (Avana) Public 20Q2	0.159
FCAMR	CRISPR (Avana) Public 20Q2	0.159
AK2	CRISPR (Avana) Public 20Q2	0.158
GID8	CRISPR (Avana) Public 20Q2	-0.157
BEND4	CRISPR (Avana) Public 20Q2	-0.157
PIK3CD	CRISPR (Avana) Public 20Q2	0.157
GTF2H2	CRISPR (Avana) Public 20Q2	-0.157
ZNF143	CRISPR (Avana) Public 20Q2	0.156
FRS3	CRISPR (Avana) Public 20Q2	0.156
ANKLE2	CRISPR (Avana) Public 20Q2	0.156
NDUFA11	CRISPR (Avana) Public 20Q2	-0.156
CDS2	CRISPR (Avana) Public 20Q2	0.156
DDA1	CRISPR (Avana) Public 20Q2	-0.155
PPCS	CRISPR (Avana) Public 20Q2	0.155
PIK3CA	CRISPR (Avana) Public 20Q2	-0.155
C1D	CRISPR (Avana) Public 20Q2	-0.154
ARL2	CRISPR (Avana) Public 20Q2	0.154
FLCN	CRISPR (Avana) Public 20Q2	0.154
CHCHD3	CRISPR (Avana) Public 20Q2	0.154
BRCA1	CRISPR (Avana) Public 20Q2	-0.154
HLA-E	CRISPR (Avana) Public 20Q2	0.153
CNIH4	CRISPR (Avana) Public 20Q2	0.153
RRM2	CRISPR (Avana) Public 20Q2	0.153
GDI2	CRISPR (Avana) Public 20Q2	0.153
PYURF	CRISPR (Avana) Public 20Q2	-0.152
EEF2	CRISPR (Avana) Public 20Q2	0.152
H2BC7	CRISPR (Avana) Public 20Q2	0.152
ACSL4	CRISPR (Avana) Public 20Q2	0.152
RPS6KA1	CRISPR (Avana) Public 20Q2	0.152
RBSN	CRISPR (Avana) Public 20Q2	0.151
CCND3	Expression Public 20Q2	-0.48
NKG7	Expression Public 20Q2	-0.417
NLRC3	Expression Public 20Q2	-0.407
NCF4	Expression Public 20Q2	-0.403
SLA	Expression Public 20Q2	-0.4
TNFAIP8L2	Expression Public 20Q2	-0.394
SPI1	Expression Public 20Q2	-0.384
MYO1G	Expression Public 20Q2	-0.379
CYTH4	Expression Public 20Q2	-0.377
SNX20	Expression Public 20Q2	-0.374
LST1	Expression Public 20Q2	-0.371
ACAP1	Expression Public 20Q2	-0.369
SASH3	Expression Public 20Q2	-0.368
PTPRC	Expression Public 20Q2	-0.366
ARL11	Expression Public 20Q2	-0.366
CCND1	Expression Public 20Q2	0.361
CD300C	Expression Public 20Q2	-0.356
FUT7	Expression Public 20Q2	-0.354
IKZF1	Expression Public 20Q2	-0.354
LAIR1	Expression Public 20Q2	-0.351
CD93	Expression Public 20Q2	-0.35
ATP8B4	Expression Public 20Q2	-0.349
IGLL1	Expression Public 20Q2	-0.348
CD53	Expression Public 20Q2	-0.345
CD72	Expression Public 20Q2	-0.344
STAP1	Expression Public 20Q2	-0.344
ARHGAP15	Expression Public 20Q2	-0.343
LILRA2	Expression Public 20Q2	-0.34
P2RY8	Expression Public 20Q2	-0.34
ZC3H12D	Expression Public 20Q2	-0.339
BTK	Expression Public 20Q2	-0.334
HCST	Expression Public 20Q2	-0.333
PARVG	Expression Public 20Q2	-0.332
GPR18	Expression Public 20Q2	-0.331
ITGAL	Expression Public 20Q2	-0.331
PTPN7	Expression Public 20Q2	-0.33
LAPTM5	Expression Public 20Q2	-0.33
WAS	Expression Public 20Q2	-0.33
TBC1D10C	Expression Public 20Q2	-0.33
SPN	Expression Public 20Q2	-0.328
DOCK2	Expression Public 20Q2	-0.328
WDFY4	Expression Public 20Q2	-0.326
NCKAP1	Expression Public 20Q2	0.326
ALOX5AP	Expression Public 20Q2	-0.325
ZNF205	Expression Public 20Q2	0.323
HCK	Expression Public 20Q2	-0.323
PXK	Expression Public 20Q2	-0.323
SLC22A16	Expression Public 20Q2	-0.322
CACNA2D4	Expression Public 20Q2	-0.322
ARHGEF6	Expression Public 20Q2	-0.32
DPEP2	Expression Public 20Q2	-0.318
LYL1	Expression Public 20Q2	-0.318
CAMSAP2	Expression Public 20Q2	0.316
LILRB2	Expression Public 20Q2	-0.316
LY86	Expression Public 20Q2	-0.316
KLHL6	Expression Public 20Q2	-0.315
ARHGAP30	Expression Public 20Q2	-0.315
GMFG	Expression Public 20Q2	-0.315
CD300LF	Expression Public 20Q2	-0.313
PIK3CG	Expression Public 20Q2	-0.312
CD84	Expression Public 20Q2	-0.312
CTTN	Expression Public 20Q2	0.311
RASAL3	Expression Public 20Q2	-0.31
EPN2	Expression Public 20Q2	0.31
FNBP1L	Expression Public 20Q2	0.31
CDC42BPB	Expression Public 20Q2	0.309
CD52	Expression Public 20Q2	-0.309
FLT3	Expression Public 20Q2	-0.308
TLR1	Expression Public 20Q2	-0.308
LCP2	Expression Public 20Q2	-0.307
AGAP1	Expression Public 20Q2	0.307
GPR65	Expression Public 20Q2	-0.307
NCF1	Expression Public 20Q2	-0.307
P2RX1	Expression Public 20Q2	-0.306
LGMN	Expression Public 20Q2	0.306
ARHGAP25	Expression Public 20Q2	-0.305
TESPA1	Expression Public 20Q2	-0.304
TJP1	Expression Public 20Q2	0.304
GRAP	Expression Public 20Q2	-0.304
CTSG	Expression Public 20Q2	-0.304
SLC2A8	Expression Public 20Q2	0.304
RGS18	Expression Public 20Q2	-0.303
RAB44	Expression Public 20Q2	-0.303
GAB3	Expression Public 20Q2	-0.302
EVI2B	Expression Public 20Q2	-0.302
SPNS3	Expression Public 20Q2	-0.302
S1PR4	Expression Public 20Q2	-0.301
FAM78A	Expression Public 20Q2	-0.301
LINGO3	Expression Public 20Q2	-0.298
RCSD1	Expression Public 20Q2	-0.297
VPREB1	Expression Public 20Q2	-0.297
CST7	Expression Public 20Q2	-0.296
PIK3AP1	Expression Public 20Q2	-0.295
MYO1F	Expression Public 20Q2	-0.295
ARMH1	Expression Public 20Q2	-0.294
ARHGEF12	Expression Public 20Q2	0.294
LAT2	Expression Public 20Q2	-0.294
CD244	Expression Public 20Q2	-0.293
C16orf54	Expression Public 20Q2	-0.292
TEAD1	Expression Public 20Q2	0.292
CDKN2B	Copy Number Public 20Q2	0.219
CDKN2A-DT	Copy Number Public 20Q2	0.209
CDKN2A	Copy Number Public 20Q2	0.209
CDKN2B-AS1	Copy Number Public 20Q2	0.209
ZNF705B	Copy Number Public 20Q2	-0.174
DEFB4A	Copy Number Public 20Q2	-0.174
USP17L8	Copy Number Public 20Q2	-0.171
FAM66E	Copy Number Public 20Q2	-0.171
GFRA2	Copy Number Public 20Q2	-0.156
MTAP	Copy Number Public 20Q2	0.154
HR	Copy Number Public 20Q2	-0.153
NUDT18	Copy Number Public 20Q2	-0.153
DOK2	Copy Number Public 20Q2	-0.153
XPO7	Copy Number Public 20Q2	-0.153
FGF17	Copy Number Public 20Q2	-0.152
NPM2	Copy Number Public 20Q2	-0.152
DMTN	Copy Number Public 20Q2	-0.15
PPP3CC	Copy Number Public 20Q2	-0.148
STC1	Copy Number Public 20Q2	-0.148
ENTPD4	Copy Number Public 20Q2	-0.147
SLC25A37	Copy Number Public 20Q2	-0.147
MIR548I3	Copy Number Public 20Q2	-0.147
TNFRSF10A	Copy Number Public 20Q2	-0.147
NKX3-1	Copy Number Public 20Q2	-0.146
LOXL2	Copy Number Public 20Q2	-0.146
R3HCC1	Copy Number Public 20Q2	-0.146
NKX2-6	Copy Number Public 20Q2	-0.146
ADAM7	Copy Number Public 20Q2	-0.145
CHMP7	Copy Number Public 20Q2	-0.145
TNFRSF10B	Copy Number Public 20Q2	-0.144
RHOBTB2	Copy Number Public 20Q2	-0.144
ADAMDEC1	Copy Number Public 20Q2	-0.144
ADAM28	Copy Number Public 20Q2	-0.144
PEBP4	Copy Number Public 20Q2	-0.143
EGR3	Copy Number Public 20Q2	-0.143
BIN3	Copy Number Public 20Q2	-0.143
BIN3-IT1	Copy Number Public 20Q2	-0.143
SLC39A14	Copy Number Public 20Q2	-0.142
PHYHIP	Copy Number Public 20Q2	-0.142
REEP4	Copy Number Public 20Q2	-0.142
POLR3D	Copy Number Public 20Q2	-0.142
SFTPC	Copy Number Public 20Q2	-0.142
BMP1	Copy Number Public 20Q2	-0.142
PIWIL2	Copy Number Public 20Q2	-0.142
MIR320A	Copy Number Public 20Q2	-0.142
LGI3	Copy Number Public 20Q2	-0.142
DOCK5	Copy Number Public 20Q2	-0.142
SORBS3	Copy Number Public 20Q2	-0.142
PDLIM2	Copy Number Public 20Q2	-0.142
CCAR2	Copy Number Public 20Q2	-0.142
C8orf58	Copy Number Public 20Q2	-0.142
NEFM	Copy Number Public 20Q2	-0.141
NEFL	Copy Number Public 20Q2	-0.141
MIR6841	Copy Number Public 20Q2	-0.141
FAM90A10P	Copy Number Public 20Q2	-0.14
EBF2	Copy Number Public 20Q2	-0.14
MIR6876	Copy Number Public 20Q2	-0.139
GNRH1	Copy Number Public 20Q2	-0.138
CDCA2	Copy Number Public 20Q2	-0.138
LINC02153	Copy Number Public 20Q2	-0.138
CSGALNACT1	Copy Number Public 20Q2	-0.137
MRGPRF-AS1	Copy Number Public 20Q2	0.136
LZTS1	Copy Number Public 20Q2	-0.136
LZTS1-AS1	Copy Number Public 20Q2	-0.136
ADRA1A	Copy Number Public 20Q2	-0.136
SLC18A1	Copy Number Public 20Q2	-0.136
LPL	Copy Number Public 20Q2	-0.136
SNORD3F	Copy Number Public 20Q2	-0.136
MYEOV	Copy Number Public 20Q2	0.136
ATP6V1B2	Copy Number Public 20Q2	-0.136
FGF4	Copy Number Public 20Q2	0.135
INTS10	Copy Number Public 20Q2	-0.135
FGF3	Copy Number Public 20Q2	0.135
MRGPRF	Copy Number Public 20Q2	0.134
SH2D4A	Copy Number Public 20Q2	-0.133
CCND1	Copy Number Public 20Q2	0.132
LINC01488	Copy Number Public 20Q2	0.132
TDRP	Copy Number Public 20Q2	-0.131
BNIP3L	Copy Number Public 20Q2	-0.131
SDAD1P1	Copy Number Public 20Q2	-0.131
PPP2R2A	Copy Number Public 20Q2	-0.131
ERICH1	Copy Number Public 20Q2	-0.131
DPYSL2	Copy Number Public 20Q2	-0.131
PNMA2	Copy Number Public 20Q2	-0.131
UNG	Copy Number Public 20Q2	0.125
ALKBH2	Copy Number Public 20Q2	0.125
USP30	Copy Number Public 20Q2	0.125
USP30-AS1	Copy Number Public 20Q2	0.125
ACACB	Copy Number Public 20Q2	0.123
FOXN4	Copy Number Public 20Q2	0.118
UNC5CL	Copy Number Public 20Q2	-0.112
TSPO2	Copy Number Public 20Q2	-0.111
CDKN2A-DT	Copy Number (Absolute)	0.213
CDKN2A	Copy Number (Absolute)	0.213
CDKN2B	Copy Number (Absolute)	0.201
CDKN2B-AS1	Copy Number (Absolute)	0.191
MYEOV	Copy Number (Absolute)	0.173
CCND1	Copy Number (Absolute)	0.168
FADD	Copy Number (Absolute)	0.168
PPFIA1	Copy Number (Absolute)	0.168
MIR548K	Copy Number (Absolute)	0.168
CTTN	Copy Number (Absolute)	0.167
FGF4	Copy Number (Absolute)	0.167
FGF3	Copy Number (Absolute)	0.167
LTO1	Copy Number (Absolute)	0.165
FGF19	Copy Number (Absolute)	0.164
MRGPRF	Copy Number (Absolute)	0.163
ANO1	Copy Number (Absolute)	0.163
TPCN2	Copy Number (Absolute)	0.161
SHANK2	Copy Number (Absolute)	0.157
MRGPRD	Copy Number (Absolute)	0.157
MTAP	Copy Number (Absolute)	0.149
IGHMBP2	Copy Number (Absolute)	0.144
MRPL21	Copy Number (Absolute)	0.144
PPP6R3	Copy Number (Absolute)	0.139
SHANK2-AS1	Copy Number (Absolute)	0.139
GAL	Copy Number (Absolute)	0.139
TESMIN	Copy Number (Absolute)	0.136
CPT1A	Copy Number (Absolute)	0.136
C11orf24	Copy Number (Absolute)	0.136
LRP5	Copy Number (Absolute)	0.136
DMRTA1	Copy Number (Absolute)	0.132
FAM86C2P	Copy Number (Absolute)	0.129
KMT5B	Copy Number (Absolute)	0.129
NDUFS8	Copy Number (Absolute)	0.128
ALDH3B1	Copy Number (Absolute)	0.128
CHKA	Copy Number (Absolute)	0.128
TCIRG1	Copy Number (Absolute)	0.128
MIR4691	Copy Number (Absolute)	0.128
UNC93B1	Copy Number (Absolute)	0.127
GRK2	Copy Number (Absolute)	0.126
ACY3	Copy Number (Absolute)	0.126
ALDH3B2	Copy Number (Absolute)	0.126
SSH3	Copy Number (Absolute)	0.125
SPTSSA	Copy Number (Absolute)	0.125
POLD4	Copy Number (Absolute)	0.125
CLCF1	Copy Number (Absolute)	0.125
PITPNM1	Copy Number (Absolute)	0.125
AIP	Copy Number (Absolute)	0.125
CABP2	Copy Number (Absolute)	0.125
CDK2AP2	Copy Number (Absolute)	0.125
CARNS1	Copy Number (Absolute)	0.125
ANKRD13D	Copy Number (Absolute)	0.124
GSTP1	Copy Number (Absolute)	0.124
RAD9A	Copy Number (Absolute)	0.124
RPS6KB2	Copy Number (Absolute)	0.124
PTPRCAP	Copy Number (Absolute)	0.124
MIR31	Copy Number (Absolute)	0.124
EAPP	Copy Number (Absolute)	0.124
TMEM134	Copy Number (Absolute)	0.124
CORO1B	Copy Number (Absolute)	0.124
CABP4	Copy Number (Absolute)	0.124
GPR152	Copy Number (Absolute)	0.124
IFNE	Copy Number (Absolute)	0.124
DHCR7	Copy Number (Absolute)	0.123
DOC2GP	Copy Number (Absolute)	0.123
TBX10	Copy Number (Absolute)	0.123
NUDT8	Copy Number (Absolute)	0.123
NDUFV1	Copy Number (Absolute)	0.123
SRP54	Copy Number (Absolute)	0.123
PPP1CA	Copy Number (Absolute)	0.123
TBC1D10C	Copy Number (Absolute)	0.123
KDM2A	Copy Number (Absolute)	0.123
IGBP1P1	Copy Number (Absolute)	0.123
SNX6	Copy Number (Absolute)	0.122
INTS4	Copy Number (Absolute)	0.122
NDUFC2-KCTD14	Copy Number (Absolute)	0.122
KCTD14	Copy Number (Absolute)	0.122
RAB1B	Copy Number (Absolute)	0.122
CNIH2	Copy Number (Absolute)	0.122
YIF1A	Copy Number (Absolute)	0.122
TMEM151A	Copy Number (Absolute)	0.122
AAMDC	Copy Number (Absolute)	0.121
NFKBIA	Copy Number (Absolute)	0.121
INSM2	Copy Number (Absolute)	0.121
RALGAPA1	Copy Number (Absolute)	0.121
CFL2	Copy Number (Absolute)	0.121
ALG8	Copy Number (Absolute)	0.121
RAB30-DT	Copy Number (Absolute)	0.121
SNORA70E	Copy Number (Absolute)	0.121
ANKRD42	Copy Number (Absolute)	0.121
PCF11	Copy Number (Absolute)	0.121
CCDC90B	Copy Number (Absolute)	0.121
CD248	Copy Number (Absolute)	0.121
RAB30	Copy Number (Absolute)	0.121
DDIAS	Copy Number (Absolute)	0.121
MIR4300	Copy Number (Absolute)	0.121
THRSP	Copy Number (Absolute)	0.121
NDUFC2	Copy Number (Absolute)	0.121
FAM177A1	Copy Number (Absolute)	0.121
B4GALT4	Mutation Public 20Q2	-0.196
CCND3	Mutation Public 20Q2	-0.19
GOLGA8R	Mutation Public 20Q2	-0.189
SLC48A1	Mutation Public 20Q2	-0.169
PRTN3	Mutation Public 20Q2	-0.166
PANX1	Mutation Public 20Q2	-0.165
KDELR1	Mutation Public 20Q2	-0.161
GOLGA8K	Mutation Public 20Q2	-0.16
LRRC8C	Mutation Public 20Q2	-0.16
UBE2V2	Mutation Public 20Q2	-0.157
FKBP1A	Mutation Public 20Q2	-0.157
BCL2	Mutation Public 20Q2	-0.148
RB1	Mutation Public 20Q2	0.147
SFRP2	Mutation Public 20Q2	-0.146
LTB	Mutation Public 20Q2	-0.144
EMP1	Mutation Public 20Q2	-0.144
EVPLL	Mutation Public 20Q2	-0.139
GCH1	Mutation Public 20Q2	-0.139
CLDN1	Mutation Public 20Q2	-0.138
KRTAP5-9	Mutation Public 20Q2	-0.137
HEATR5A	Mutation Public 20Q2	0.134
PGGHG	Mutation Public 20Q2	-0.133
SLC22A16	Mutation Public 20Q2	-0.132
ZNF544	Mutation Public 20Q2	-0.132
ARC	Mutation Public 20Q2	-0.131
RHOXF2B	Mutation Public 20Q2	-0.131
MSANTD3-TMEFF1	Mutation Public 20Q2	-0.13
ZNF407	Mutation Public 20Q2	0.13
LYZL6	Mutation Public 20Q2	-0.13
FOXP3	Mutation Public 20Q2	-0.13
SLC25A4	Mutation Public 20Q2	-0.13
DPPA2	Mutation Public 20Q2	-0.129
COQ10B	Mutation Public 20Q2	-0.129
MOSMO	Mutation Public 20Q2	-0.128
SLC15A3	Mutation Public 20Q2	-0.126
CCL8	Mutation Public 20Q2	-0.126
MAP7D3	Mutation Public 20Q2	0.126
SLC31A1	Mutation Public 20Q2	-0.125
MMGT1	Mutation Public 20Q2	-0.125
CDCA8	Mutation Public 20Q2	-0.124
MNX1	Mutation Public 20Q2	-0.123
RNF24	Mutation Public 20Q2	-0.123
THEMIS2	Mutation Public 20Q2	-0.123
GUCA2A	Mutation Public 20Q2	-0.123
OR4C46	Mutation Public 20Q2	0.122
UBE3A	Mutation Public 20Q2	0.122
NCSTN	Mutation Public 20Q2	-0.121
RHBDF1	Mutation Public 20Q2	-0.118
FOCAD	Mutation Public 20Q2	0.117
ZCCHC8	Mutation Public 20Q2	0.117
STRIP2	Mutation Public 20Q2	0.117
DZANK1	Mutation Public 20Q2	-0.117
ATP6V0E1	Mutation Public 20Q2	-0.116
IQSEC1	Mutation Public 20Q2	0.116
DNPH1	Mutation Public 20Q2	-0.116
RAC3	Mutation Public 20Q2	-0.116
MVP	Mutation Public 20Q2	0.115
ZNF596	Mutation Public 20Q2	0.115
LRRK2	Mutation Public 20Q2	0.115
LAMB1	Mutation Public 20Q2	0.115
LINC01590	Mutation Public 20Q2	-0.115
CALD1	Mutation Public 20Q2	0.114
MIA	Mutation Public 20Q2	-0.114
RAB10	Mutation Public 20Q2	-0.114
RGPD8	Mutation Public 20Q2	0.114
GRID1	Mutation Public 20Q2	0.114
MRNIP	Mutation Public 20Q2	-0.114
CDK11B	Mutation Public 20Q2	0.114
MCM3	Mutation Public 20Q2	-0.114
ZFAT	Mutation Public 20Q2	0.113
CDIP1	Mutation Public 20Q2	-0.113
ATP6V1G2-DDX39B	Mutation Public 20Q2	-0.113
KANK4	Mutation Public 20Q2	0.113
MRPS30	Mutation Public 20Q2	0.112
ANKRD20A2	Mutation Public 20Q2	-0.112
ADAMTS20	Mutation Public 20Q2	0.111
STIP1	Mutation Public 20Q2	0.111
UBE4B	Mutation Public 20Q2	0.111
FLII	Mutation Public 20Q2	0.111
MRPS14	Mutation Public 20Q2	-0.111
EYA4	Mutation Public 20Q2	0.111
PGAM5	Mutation Public 20Q2	-0.111
MYO5A	Mutation Public 20Q2	0.111
PPM1H	Mutation Public 20Q2	-0.111
BMPR1A	Mutation Public 20Q2	0.111
MED23	Mutation Public 20Q2	0.11
TDRKH	Mutation Public 20Q2	0.11
MSH5	Mutation Public 20Q2	0.11
SNAPIN	Mutation Public 20Q2	-0.11
CHST2	Mutation Public 20Q2	-0.109
CROCC	Mutation Public 20Q2	0.109
FBXO34	Mutation Public 20Q2	0.109
KIAA0825	Mutation Public 20Q2	0.109
EPB41L5	Mutation Public 20Q2	0.109
ARHGAP15	Mutation Public 20Q2	0.108
SLC25A24	Mutation Public 20Q2	-0.108
PTPRB	Mutation Public 20Q2	-0.108
NPIPA2	Mutation Public 20Q2	-0.108
XPO4	Mutation Public 20Q2	-0.108
ZNF155	Mutation Public 20Q2	0.108

## Sheet: CCNE1
Gene/Compound	Dataset	Correlation
CDK2	CRISPR (Avana) Public 20Q2	0.528
SKP2	CRISPR (Avana) Public 20Q2	0.396
CKS1B	CRISPR (Avana) Public 20Q2	0.359
CDK6	CRISPR (Avana) Public 20Q2	-0.292
E2F3	CRISPR (Avana) Public 20Q2	0.288
PAX8	CRISPR (Avana) Public 20Q2	0.28
DLL3	CRISPR (Avana) Public 20Q2	0.265
RB1	CRISPR (Avana) Public 20Q2	-0.263
SBSN	CRISPR (Avana) Public 20Q2	0.262
PLEKHF1	CRISPR (Avana) Public 20Q2	0.262
WNK1	CRISPR (Avana) Public 20Q2	-0.241
ZNF569	CRISPR (Avana) Public 20Q2	0.241
MECOM	CRISPR (Avana) Public 20Q2	0.232
RBL2	CRISPR (Avana) Public 20Q2	-0.23
WDR77	CRISPR (Avana) Public 20Q2	-0.228
MASTL	CRISPR (Avana) Public 20Q2	-0.22
SCGB2B2	CRISPR (Avana) Public 20Q2	0.219
KCTD15	CRISPR (Avana) Public 20Q2	0.218
ZNF793	CRISPR (Avana) Public 20Q2	0.217
ZNF546	CRISPR (Avana) Public 20Q2	0.215
ZNF780B	CRISPR (Avana) Public 20Q2	0.213
NCCRP1	CRISPR (Avana) Public 20Q2	0.212
GLE1	CRISPR (Avana) Public 20Q2	0.21
LGALS13	CRISPR (Avana) Public 20Q2	0.209
SPHK2	CRISPR (Avana) Public 20Q2	0.208
APLP1	CRISPR (Avana) Public 20Q2	0.202
FOSL1	CRISPR (Avana) Public 20Q2	-0.201
CCND1	CRISPR (Avana) Public 20Q2	-0.2
SNRNP70	CRISPR (Avana) Public 20Q2	0.199
KIDINS220	CRISPR (Avana) Public 20Q2	0.198
EML2	CRISPR (Avana) Public 20Q2	0.198
RSPH6A	CRISPR (Avana) Public 20Q2	0.196
TIMM50	CRISPR (Avana) Public 20Q2	0.196
ZNF585B	CRISPR (Avana) Public 20Q2	0.196
FAAP24	CRISPR (Avana) Public 20Q2	0.195
ATP1A3	CRISPR (Avana) Public 20Q2	0.195
SULT2B1	CRISPR (Avana) Public 20Q2	0.193
TICRR	CRISPR (Avana) Public 20Q2	0.193
POU2F2	CRISPR (Avana) Public 20Q2	0.192
ZNF571	CRISPR (Avana) Public 20Q2	0.191
TFDP2	CRISPR (Avana) Public 20Q2	0.191
CCT4	CRISPR (Avana) Public 20Q2	-0.191
EID2	CRISPR (Avana) Public 20Q2	0.19
RHPN2	CRISPR (Avana) Public 20Q2	0.189
XPR1	CRISPR (Avana) Public 20Q2	0.188
CLDN4	CRISPR (Avana) Public 20Q2	-0.187
UBE2Q1	CRISPR (Avana) Public 20Q2	0.187
ZNF224	CRISPR (Avana) Public 20Q2	0.186
ZNF567	CRISPR (Avana) Public 20Q2	0.186
IGFLR1	CRISPR (Avana) Public 20Q2	0.185
RAB6A	CRISPR (Avana) Public 20Q2	-0.184
RBL1	CRISPR (Avana) Public 20Q2	-0.184
CPT2	CRISPR (Avana) Public 20Q2	0.183
STN1	CRISPR (Avana) Public 20Q2	-0.181
WDR88	CRISPR (Avana) Public 20Q2	0.179
ZMYM3	CRISPR (Avana) Public 20Q2	0.178
EID2B	CRISPR (Avana) Public 20Q2	0.178
BICRA	CRISPR (Avana) Public 20Q2	0.178
TFIP11	CRISPR (Avana) Public 20Q2	0.177
SMARCA4	CRISPR (Avana) Public 20Q2	0.177
UPK1A	CRISPR (Avana) Public 20Q2	0.177
PFDN1	CRISPR (Avana) Public 20Q2	-0.176
DUOX2	CRISPR (Avana) Public 20Q2	-0.175
ZNF599	CRISPR (Avana) Public 20Q2	0.175
ZFP36	CRISPR (Avana) Public 20Q2	0.174
VBP1	CRISPR (Avana) Public 20Q2	-0.174
GTF2A1	CRISPR (Avana) Public 20Q2	0.174
NUP107	CRISPR (Avana) Public 20Q2	0.174
POT1	CRISPR (Avana) Public 20Q2	-0.173
PHF23	CRISPR (Avana) Public 20Q2	0.173
ORC6	CRISPR (Avana) Public 20Q2	0.172
TTF1	CRISPR (Avana) Public 20Q2	0.172
ASH1L	CRISPR (Avana) Public 20Q2	0.171
PIMREG	CRISPR (Avana) Public 20Q2	-0.171
ZNF229	CRISPR (Avana) Public 20Q2	0.17
GRPEL1	CRISPR (Avana) Public 20Q2	0.17
SOX17	CRISPR (Avana) Public 20Q2	0.169
FXYD3	CRISPR (Avana) Public 20Q2	0.169
C19orf12	CRISPR (Avana) Public 20Q2	0.169
CDC42EP5	CRISPR (Avana) Public 20Q2	0.169
SMNDC1	CRISPR (Avana) Public 20Q2	0.169
ETV2	CRISPR (Avana) Public 20Q2	0.169
NOL8	CRISPR (Avana) Public 20Q2	0.168
IFNA5	CRISPR (Avana) Public 20Q2	-0.168
ELN	CRISPR (Avana) Public 20Q2	-0.167
DNM1L	CRISPR (Avana) Public 20Q2	0.167
GRAMD1A	CRISPR (Avana) Public 20Q2	0.167
ZBTB32	CRISPR (Avana) Public 20Q2	0.166
GRHL2	CRISPR (Avana) Public 20Q2	-0.166
TEN1	CRISPR (Avana) Public 20Q2	-0.166
PINLYP	CRISPR (Avana) Public 20Q2	0.165
SEC16A	CRISPR (Avana) Public 20Q2	0.165
CDKN2A	CRISPR (Avana) Public 20Q2	-0.165
KANSL2	CRISPR (Avana) Public 20Q2	0.164
MYRF	CRISPR (Avana) Public 20Q2	0.164
ZNF880	CRISPR (Avana) Public 20Q2	0.164
MNT	CRISPR (Avana) Public 20Q2	-0.163
HCST	CRISPR (Avana) Public 20Q2	0.163
CATSPERD	CRISPR (Avana) Public 20Q2	0.163
KAT2A	CRISPR (Avana) Public 20Q2	0.162
CCNE1	Expression Public 20Q2	-0.416
FGF18	Expression Public 20Q2	-0.395
SOX17	Expression Public 20Q2	-0.395
SLC6A12	Expression Public 20Q2	-0.337
COL26A1	Expression Public 20Q2	-0.337
PPP1R14A	Expression Public 20Q2	-0.299
SPON1	Expression Public 20Q2	-0.285
SLC34A2	Expression Public 20Q2	-0.282
CLDN16	Expression Public 20Q2	-0.282
GJA8	Expression Public 20Q2	-0.279
KCNG3	Expression Public 20Q2	-0.266
ERBB4	Expression Public 20Q2	-0.265
SELENOV	Expression Public 20Q2	-0.264
SRSF12	Expression Public 20Q2	-0.259
KLRG2	Expression Public 20Q2	-0.255
PTGDS	Expression Public 20Q2	-0.253
APLP1	Expression Public 20Q2	-0.253
RB1	Expression Public 20Q2	0.253
FABP3	Expression Public 20Q2	-0.249
MFAP5	Expression Public 20Q2	-0.245
SLC14A2	Expression Public 20Q2	-0.244
LGALS14	Expression Public 20Q2	-0.242
FILIP1	Expression Public 20Q2	-0.24
ZDHHC19	Expression Public 20Q2	-0.24
WFDC11	Expression Public 20Q2	-0.238
CLUL1	Expression Public 20Q2	-0.237
APOE	Expression Public 20Q2	-0.237
LRFN1	Expression Public 20Q2	-0.237
LCNL1	Expression Public 20Q2	-0.237
OGDHL	Expression Public 20Q2	-0.236
TNNI3	Expression Public 20Q2	-0.234
CDKN2A	Expression Public 20Q2	-0.233
CSPG5	Expression Public 20Q2	-0.231
FZD9	Expression Public 20Q2	-0.23
SLC5A2	Expression Public 20Q2	-0.229
ASRGL1	Expression Public 20Q2	-0.228
CERS1	Expression Public 20Q2	-0.228
NAT8L	Expression Public 20Q2	-0.228
MYOCOS	Expression Public 20Q2	-0.227
GDF1	Expression Public 20Q2	-0.225
TCF15	Expression Public 20Q2	-0.225
COL25A1	Expression Public 20Q2	-0.224
THAP8	Expression Public 20Q2	-0.224
MEOX1	Expression Public 20Q2	-0.223
NPR1	Expression Public 20Q2	-0.221
SULT4A1	Expression Public 20Q2	-0.221
SLC12A3	Expression Public 20Q2	-0.221
FLT3LG	Expression Public 20Q2	0.22
HIF3A	Expression Public 20Q2	-0.22
SSC4D	Expression Public 20Q2	-0.219
EMX2	Expression Public 20Q2	-0.218
CSH2	Expression Public 20Q2	-0.218
CSH1	Expression Public 20Q2	-0.217
CLCNKB	Expression Public 20Q2	-0.217
LAMC3	Expression Public 20Q2	-0.216
TUBB4A	Expression Public 20Q2	-0.215
APOL6	Expression Public 20Q2	0.214
CILP	Expression Public 20Q2	-0.213
DIPK1B	Expression Public 20Q2	-0.212
PNMA8A	Expression Public 20Q2	-0.21
WNK3	Expression Public 20Q2	-0.21
INA	Expression Public 20Q2	-0.21
ZNF853	Expression Public 20Q2	-0.21
LHX6	Expression Public 20Q2	-0.21
TNFAIP8	Expression Public 20Q2	0.209
BTG1	Expression Public 20Q2	0.208
LINGO1	Expression Public 20Q2	-0.207
RAB6B	Expression Public 20Q2	-0.206
TRIM34	Expression Public 20Q2	0.206
DNAJB13	Expression Public 20Q2	-0.206
GPR27	Expression Public 20Q2	-0.206
RXFP1	Expression Public 20Q2	-0.205
IRF2	Expression Public 20Q2	0.205
PLD3	Expression Public 20Q2	-0.205
KCNC3	Expression Public 20Q2	-0.204
RSPO4	Expression Public 20Q2	-0.204
ZNF667	Expression Public 20Q2	-0.202
LRRCC1	Expression Public 20Q2	0.202
FNDC10	Expression Public 20Q2	-0.202
IVNS1ABP	Expression Public 20Q2	-0.201
DLX5	Expression Public 20Q2	-0.201
KLHL14	Expression Public 20Q2	-0.2
FSD1	Expression Public 20Q2	-0.2
HOXD1	Expression Public 20Q2	-0.199
LIX1	Expression Public 20Q2	-0.199
ART5	Expression Public 20Q2	-0.199
ZNF793	Expression Public 20Q2	-0.199
QPRT	Expression Public 20Q2	-0.199
CASKIN1	Expression Public 20Q2	-0.199
GH2	Expression Public 20Q2	-0.198
SQOR	Expression Public 20Q2	0.197
GPC4	Expression Public 20Q2	-0.197
SLC6A13	Expression Public 20Q2	-0.197
ZNF382	Expression Public 20Q2	-0.197
ISYNA1	Expression Public 20Q2	-0.197
NRTN	Expression Public 20Q2	-0.197
FAM107A	Expression Public 20Q2	-0.197
C19orf12	Expression Public 20Q2	-0.197
CTXN1	Expression Public 20Q2	-0.196
CRYBG1	Expression Public 20Q2	0.196
URI1	Copy Number Public 20Q2	-0.271
C19orf12	Copy Number Public 20Q2	-0.26
PLEKHF1	Copy Number Public 20Q2	-0.259
CCNE1	Copy Number Public 20Q2	-0.257
POP4	Copy Number Public 20Q2	-0.252
ZNF536	Copy Number Public 20Q2	-0.245
VSTM2B	Copy Number Public 20Q2	-0.24
LINC01782	Copy Number Public 20Q2	-0.216
LINC01533	Copy Number Public 20Q2	-0.216
DPY19L3	Copy Number Public 20Q2	-0.216
ZNF507	Copy Number Public 20Q2	-0.213
CEP89	Copy Number Public 20Q2	-0.212
LINC01791	Copy Number Public 20Q2	-0.208
TSHZ3	Copy Number Public 20Q2	-0.208
SLC7A9	Copy Number Public 20Q2	-0.207
SNORA68B	Copy Number Public 20Q2	-0.205
RGS9BP	Copy Number Public 20Q2	-0.205
NUDT19	Copy Number Public 20Q2	-0.204
TDRD12	Copy Number Public 20Q2	-0.203
FAAP24	Copy Number Public 20Q2	-0.202
LRRK1	Copy Number Public 20Q2	0.201
ZNF181	Copy Number Public 20Q2	-0.201
ANKRD27	Copy Number Public 20Q2	-0.201
RHPN2	Copy Number Public 20Q2	-0.2
GPATCH1	Copy Number Public 20Q2	-0.2
SCN1B	Copy Number Public 20Q2	-0.2
LINC01801	Copy Number Public 20Q2	-0.199
ZNF599	Copy Number Public 20Q2	-0.199
CDKN2B-AS1	Copy Number Public 20Q2	-0.198
WDR62	Copy Number Public 20Q2	-0.197
CHSY1	Copy Number Public 20Q2	0.197
PDCD5	Copy Number Public 20Q2	-0.197
LINC00662	Copy Number Public 20Q2	-0.197
ASB7	Copy Number Public 20Q2	0.197
UQCRFS1	Copy Number Public 20Q2	-0.196
LINC00906	Copy Number Public 20Q2	-0.196
LINC01532	Copy Number Public 20Q2	-0.196
LINC01838	Copy Number Public 20Q2	-0.196
ZNF30-AS1	Copy Number Public 20Q2	-0.196
ZNF30	Copy Number Public 20Q2	-0.196
HPN	Copy Number Public 20Q2	-0.196
CDKN2B	Copy Number Public 20Q2	-0.196
ZNF792	Copy Number Public 20Q2	-0.196
LINC00904	Copy Number Public 20Q2	-0.196
IFNL1	Copy Number Public 20Q2	-0.195
IFNL2	Copy Number Public 20Q2	-0.195
COX7A1	Copy Number Public 20Q2	-0.195
LINS1	Copy Number Public 20Q2	0.195
PRKXP1	Copy Number Public 20Q2	0.195
CAPNS1	Copy Number Public 20Q2	-0.195
HPN-AS1	Copy Number Public 20Q2	-0.194
POLR2I	Copy Number Public 20Q2	-0.194
TBCB	Copy Number Public 20Q2	-0.194
CDKN2A-DT	Copy Number Public 20Q2	-0.193
CDKN2A	Copy Number Public 20Q2	-0.193
ACTN4	Copy Number Public 20Q2	-0.193
LRP3	Copy Number Public 20Q2	-0.193
ZBTB32	Copy Number Public 20Q2	-0.193
CERS3	Copy Number Public 20Q2	0.193
FFAR1	Copy Number Public 20Q2	-0.193
LINC01197	Copy Number Public 20Q2	0.193
PCSK6-AS1	Copy Number Public 20Q2	0.193
CERS3-AS1	Copy Number Public 20Q2	0.192
SPATA41	Copy Number Public 20Q2	0.192
LGI4	Copy Number Public 20Q2	-0.192
MIR6887	Copy Number Public 20Q2	-0.192
LRFN3	Copy Number Public 20Q2	-0.192
TYROBP	Copy Number Public 20Q2	-0.192
HCST	Copy Number Public 20Q2	-0.192
OVOL3	Copy Number Public 20Q2	-0.192
PCSK6	Copy Number Public 20Q2	0.192
THAP8	Copy Number Public 20Q2	-0.191
NR2F2	Copy Number Public 20Q2	0.191
MIR1469	Copy Number Public 20Q2	0.191
KIRREL2	Copy Number Public 20Q2	-0.191
SDHAF1	Copy Number Public 20Q2	-0.191
NR2F2-AS1	Copy Number Public 20Q2	0.191
LINC00924	Copy Number Public 20Q2	0.191
FXYD3	Copy Number Public 20Q2	-0.191
SNRPA1	Copy Number Public 20Q2	0.191
SELENOS	Copy Number Public 20Q2	0.191
ZNF302	Copy Number Public 20Q2	-0.19
SCGB2B3P	Copy Number Public 20Q2	-0.19
OR4F13P	Copy Number Public 20Q2	0.19
SCGB1B2P	Copy Number Public 20Q2	-0.19
SCGB2B2	Copy Number Public 20Q2	-0.19
ZNF807P	Copy Number Public 20Q2	-0.19
WTIP	Copy Number Public 20Q2	-0.19
NPHS1	Copy Number Public 20Q2	-0.189
DNM1P46	Copy Number Public 20Q2	0.189
PDCD2L	Copy Number Public 20Q2	-0.189
LYSMD4	Copy Number Public 20Q2	0.189
FFAR2	Copy Number Public 20Q2	-0.189
ADAMTS17	Copy Number Public 20Q2	0.189
PRODH2	Copy Number Public 20Q2	-0.189
FXYD7	Copy Number Public 20Q2	-0.188
FXYD1	Copy Number Public 20Q2	-0.188
LSR	Copy Number Public 20Q2	-0.188
ALKBH6	Copy Number Public 20Q2	-0.188
CLIP3	Copy Number Public 20Q2	-0.188
CCNE1	Copy Number (Absolute)	-0.228
URI1	Copy Number (Absolute)	-0.227
C19orf12	Copy Number (Absolute)	-0.213
PLEKHF1	Copy Number (Absolute)	-0.213
VSTM2B	Copy Number (Absolute)	-0.211
POP4	Copy Number (Absolute)	-0.208
CDKN2B	Copy Number (Absolute)	-0.206
CDKN2B-AS1	Copy Number (Absolute)	-0.205
LRFN1	Copy Number (Absolute)	-0.202
IFNL1	Copy Number (Absolute)	-0.202
LINC00906	Copy Number (Absolute)	-0.2
ZNF546	Copy Number (Absolute)	-0.2
PSMC4	Copy Number (Absolute)	-0.2
ZNF536	Copy Number (Absolute)	-0.199
LINC01532	Copy Number (Absolute)	-0.199
UQCRFS1	Copy Number (Absolute)	-0.197
DYRK1B	Copy Number (Absolute)	-0.196
FCGBP	Copy Number (Absolute)	-0.196
FBL	Copy Number (Absolute)	-0.196
ZNF780B	Copy Number (Absolute)	-0.195
LGALS13	Copy Number (Absolute)	-0.193
LGALS16	Copy Number (Absolute)	-0.193
ZNF780A	Copy Number (Absolute)	-0.193
CLC	Copy Number (Absolute)	-0.192
LEUTX	Copy Number (Absolute)	-0.192
IFNL2	Copy Number (Absolute)	-0.191
PLEKHG2	Copy Number (Absolute)	-0.19
RPS16	Copy Number (Absolute)	-0.19
LGALS14	Copy Number (Absolute)	-0.19
TIMM50	Copy Number (Absolute)	-0.19
SUPT5H	Copy Number (Absolute)	-0.19
DLL3	Copy Number (Absolute)	-0.19
SELENOV	Copy Number (Absolute)	-0.189
EID2	Copy Number (Absolute)	-0.189
EID2B	Copy Number (Absolute)	-0.189
CAPN12	Copy Number (Absolute)	-0.189
ZNF569	Copy Number (Absolute)	-0.189
ZNF527	Copy Number (Absolute)	-0.189
ACTN4	Copy Number (Absolute)	-0.188
GMFG	Copy Number (Absolute)	-0.188
EIF3K	Copy Number (Absolute)	-0.187
ZFP14	Copy Number (Absolute)	-0.185
LINC00665	Copy Number (Absolute)	-0.185
ZFP36	Copy Number (Absolute)	-0.184
MIR4530	Copy Number (Absolute)	-0.184
MED29	Copy Number (Absolute)	-0.183
PAF1	Copy Number (Absolute)	-0.183
ZNF875	Copy Number (Absolute)	-0.183
FAM98C	Copy Number (Absolute)	-0.182
RASGRP4	Copy Number (Absolute)	-0.182
RYR1	Copy Number (Absolute)	-0.182
SAMD4B	Copy Number (Absolute)	-0.181
TSHZ3	Copy Number (Absolute)	-0.181
MAP4K1	Copy Number (Absolute)	-0.181
ZNF420	Copy Number (Absolute)	-0.18
ZNF461	Copy Number (Absolute)	-0.18
ZNF382	Copy Number (Absolute)	-0.18
ZNF585B	Copy Number (Absolute)	-0.179
ZNF585A	Copy Number (Absolute)	-0.179
ZNF790	Copy Number (Absolute)	-0.179
ZNF790-AS1	Copy Number (Absolute)	-0.179
ZNF567	Copy Number (Absolute)	-0.178
ZNF850	Copy Number (Absolute)	-0.178
MAP3K10	Copy Number (Absolute)	-0.177
ZFP82	Copy Number (Absolute)	-0.177
CNTD2	Copy Number (Absolute)	-0.176
MIR641	Copy Number (Absolute)	-0.176
AKT2	Copy Number (Absolute)	-0.176
TTC9B	Copy Number (Absolute)	-0.176
ZNF383	Copy Number (Absolute)	-0.176
LGALS7	Copy Number (Absolute)	-0.176
CDKN2A-DT	Copy Number (Absolute)	-0.176
CDKN2A	Copy Number (Absolute)	-0.176
SPRED3	Copy Number (Absolute)	-0.176
GGN	Copy Number (Absolute)	-0.176
PSMD8	Copy Number (Absolute)	-0.175
ZNF568	Copy Number (Absolute)	-0.175
ZNF829	Copy Number (Absolute)	-0.175
WTIP	Copy Number (Absolute)	-0.174
ZNF345	Copy Number (Absolute)	-0.174
ZNF566	Copy Number (Absolute)	-0.173
SCGB1B2P	Copy Number (Absolute)	-0.173
SCGB2B2	Copy Number (Absolute)	-0.173
ZNF529	Copy Number (Absolute)	-0.172
LGALS4	Copy Number (Absolute)	-0.172
ZNF302	Copy Number (Absolute)	-0.172
ANKRD27	Copy Number (Absolute)	-0.172
SCGB2B3P	Copy Number (Absolute)	-0.171
LGALS7B	Copy Number (Absolute)	-0.171
ZNF146	Copy Number (Absolute)	-0.171
ZNF260	Copy Number (Absolute)	-0.17
CAPNS1	Copy Number (Absolute)	-0.17
WDR62	Copy Number (Absolute)	-0.17
ZNF565	Copy Number (Absolute)	-0.17
ZNF181	Copy Number (Absolute)	-0.17
ZNF30	Copy Number (Absolute)	-0.17
LINC00904	Copy Number (Absolute)	-0.17
COX7A1	Copy Number (Absolute)	-0.169
DPY19L3	Copy Number (Absolute)	-0.169
MRPS12	Copy Number (Absolute)	-0.169
TTC19	Mutation Public 20Q2	-0.252
HMMR	Mutation Public 20Q2	-0.225
BIRC2	Mutation Public 20Q2	-0.211
PRPSAP2	Mutation Public 20Q2	-0.201
HDDC3	Mutation Public 20Q2	-0.201
HMGB3	Mutation Public 20Q2	-0.199
KLRF1	Mutation Public 20Q2	-0.196
CENPK	Mutation Public 20Q2	-0.194
MVB12B	Mutation Public 20Q2	-0.193
ANKRD40	Mutation Public 20Q2	-0.187
MEMO1	Mutation Public 20Q2	-0.184
SESN2	Mutation Public 20Q2	-0.182
DOP1A	Mutation Public 20Q2	-0.179
UBE2G1	Mutation Public 20Q2	-0.176
CHKB-CPT1B	Mutation Public 20Q2	-0.176
PAQR5	Mutation Public 20Q2	-0.176
PLAA	Mutation Public 20Q2	-0.176
CASKIN2	Mutation Public 20Q2	-0.175
ACAA1	Mutation Public 20Q2	-0.174
RNF19A	Mutation Public 20Q2	-0.173
SDHAF2	Mutation Public 20Q2	-0.172
GDNF	Mutation Public 20Q2	-0.171
U2AF1	Mutation Public 20Q2	-0.171
PRL	Mutation Public 20Q2	-0.171
TSPAN6	Mutation Public 20Q2	-0.169
DYNC2LI1	Mutation Public 20Q2	-0.169
SLC25A44	Mutation Public 20Q2	-0.169
ZFP90	Mutation Public 20Q2	-0.169
MEP1A	Mutation Public 20Q2	-0.168
F10	Mutation Public 20Q2	-0.168
SCOC	Mutation Public 20Q2	-0.167
H1-0	Mutation Public 20Q2	-0.167
DEFB128	Mutation Public 20Q2	-0.167
CXCL16	Mutation Public 20Q2	-0.167
DESI2	Mutation Public 20Q2	-0.165
DCTN3	Mutation Public 20Q2	-0.164
PKNOX1	Mutation Public 20Q2	-0.164
ZNF491	Mutation Public 20Q2	-0.163
RPP38	Mutation Public 20Q2	-0.163
OR52N1	Mutation Public 20Q2	-0.163
CHMP4B	Mutation Public 20Q2	-0.163
BUB1B	Mutation Public 20Q2	-0.162
UQCRC1	Mutation Public 20Q2	-0.162
EIF4E2	Mutation Public 20Q2	-0.162
MRPS27	Mutation Public 20Q2	-0.162
ZNF473	Mutation Public 20Q2	-0.161
MYCT1	Mutation Public 20Q2	-0.159
ZNF415	Mutation Public 20Q2	-0.159
INS	Mutation Public 20Q2	-0.159
TMEM217	Mutation Public 20Q2	-0.159
TAS2R8	Mutation Public 20Q2	-0.158
C2orf83	Mutation Public 20Q2	-0.158
SDE2	Mutation Public 20Q2	-0.157
EPHA6	Mutation Public 20Q2	-0.157
LEKR1	Mutation Public 20Q2	-0.157
MGAT4A	Mutation Public 20Q2	-0.157
ATF7	Mutation Public 20Q2	-0.157
LCE3B	Mutation Public 20Q2	-0.156
KCNRG	Mutation Public 20Q2	-0.156
ISCA2	Mutation Public 20Q2	-0.156
RNF208	Mutation Public 20Q2	-0.155
EIF6	Mutation Public 20Q2	-0.155
ARMC1	Mutation Public 20Q2	-0.155
C1orf226	Mutation Public 20Q2	-0.155
HES7	Mutation Public 20Q2	-0.155
LZTFL1	Mutation Public 20Q2	-0.155
RSPRY1	Mutation Public 20Q2	-0.154
HSF4	Mutation Public 20Q2	-0.153
HSD17B7	Mutation Public 20Q2	-0.153
KRTAP3-2	Mutation Public 20Q2	-0.153
CORT	Mutation Public 20Q2	-0.153
CLDN12	Mutation Public 20Q2	-0.153
FBLL1	Mutation Public 20Q2	-0.153
KITLG	Mutation Public 20Q2	-0.152
ZNF253	Mutation Public 20Q2	-0.152
RXFP2	Mutation Public 20Q2	-0.152
PPP2CA	Mutation Public 20Q2	-0.152
DAXX	Mutation Public 20Q2	-0.151
ZNF318	Mutation Public 20Q2	-0.151
UBE2Z	Mutation Public 20Q2	-0.151
GSDMB	Mutation Public 20Q2	-0.15
ADAMTS17	Mutation Public 20Q2	-0.15
ZNF510	Mutation Public 20Q2	-0.15
CAST	Mutation Public 20Q2	-0.15
UPF3B	Mutation Public 20Q2	-0.15
FAM133B	Mutation Public 20Q2	-0.149
EHF	Mutation Public 20Q2	-0.149
AMACR	Mutation Public 20Q2	-0.149
DUSP14	Mutation Public 20Q2	-0.149
NAT1	Mutation Public 20Q2	-0.149
SMS	Mutation Public 20Q2	-0.149
ZCCHC9	Mutation Public 20Q2	-0.148
FDX1	Mutation Public 20Q2	-0.148
PIAS2	Mutation Public 20Q2	-0.148
VAMP4	Mutation Public 20Q2	-0.148
CYP27A1	Mutation Public 20Q2	-0.148
SAA4	Mutation Public 20Q2	-0.148
BNC2	Mutation Public 20Q2	-0.147
NDRG2	Mutation Public 20Q2	-0.147
ZNF45	Mutation Public 20Q2	-0.147

## Sheet: CCNE2
Gene/Compound	Dataset	Correlation
CDK2	CRISPR (Avana) Public 20Q2	0.282
E2F7	CRISPR (Avana) Public 20Q2	0.277
CKS1B	CRISPR (Avana) Public 20Q2	0.26
SKP2	CRISPR (Avana) Public 20Q2	0.247
SNX25	CRISPR (Avana) Public 20Q2	0.242
ZFAND1	CRISPR (Avana) Public 20Q2	0.232
E2F3	CRISPR (Avana) Public 20Q2	0.222
CPNE3	CRISPR (Avana) Public 20Q2	0.209
BBS9	CRISPR (Avana) Public 20Q2	0.209
SCHIP1	CRISPR (Avana) Public 20Q2	0.204
IMPA1	CRISPR (Avana) Public 20Q2	0.199
GGCT	CRISPR (Avana) Public 20Q2	0.195
RFFL	CRISPR (Avana) Public 20Q2	0.195
NSL1	CRISPR (Avana) Public 20Q2	0.195
PREB	CRISPR (Avana) Public 20Q2	0.194
CDYL	CRISPR (Avana) Public 20Q2	0.194
CLN3	CRISPR (Avana) Public 20Q2	0.189
ANO2	CRISPR (Avana) Public 20Q2	-0.187
OSBPL6	CRISPR (Avana) Public 20Q2	0.186
N6AMT1	CRISPR (Avana) Public 20Q2	-0.183
DCSTAMP	CRISPR (Avana) Public 20Q2	0.183
ADAT3	CRISPR (Avana) Public 20Q2	-0.182
CYP7A1	CRISPR (Avana) Public 20Q2	0.181
CAPN14	CRISPR (Avana) Public 20Q2	-0.18
OR10C1	CRISPR (Avana) Public 20Q2	0.18
DTNBP1	CRISPR (Avana) Public 20Q2	0.179
RBFOX1	CRISPR (Avana) Public 20Q2	0.179
MPP5	CRISPR (Avana) Public 20Q2	0.176
SNX16	CRISPR (Avana) Public 20Q2	0.176
XPO1	CRISPR (Avana) Public 20Q2	0.175
FAM91A1	CRISPR (Avana) Public 20Q2	0.174
NTHL1	CRISPR (Avana) Public 20Q2	0.172
RERE	CRISPR (Avana) Public 20Q2	-0.171
IGBP1	CRISPR (Avana) Public 20Q2	0.171
GEM	CRISPR (Avana) Public 20Q2	0.17
MED21	CRISPR (Avana) Public 20Q2	0.17
TCF19	CRISPR (Avana) Public 20Q2	0.17
CHST11	CRISPR (Avana) Public 20Q2	0.17
GANAB	CRISPR (Avana) Public 20Q2	-0.17
CCDC177	CRISPR (Avana) Public 20Q2	0.17
MAP2K6	CRISPR (Avana) Public 20Q2	0.168
TPI1	CRISPR (Avana) Public 20Q2	-0.167
FAM200B	CRISPR (Avana) Public 20Q2	0.167
TRPA1	CRISPR (Avana) Public 20Q2	0.167
ERAP1	CRISPR (Avana) Public 20Q2	0.165
POC1B	CRISPR (Avana) Public 20Q2	0.165
LIN37	CRISPR (Avana) Public 20Q2	-0.165
SOX1	CRISPR (Avana) Public 20Q2	0.164
CABP2	CRISPR (Avana) Public 20Q2	-0.163
RAD9A	CRISPR (Avana) Public 20Q2	-0.163
PRIM1	CRISPR (Avana) Public 20Q2	0.163
BBS10	CRISPR (Avana) Public 20Q2	0.162
LCN15	CRISPR (Avana) Public 20Q2	-0.162
FXYD4	CRISPR (Avana) Public 20Q2	-0.162
MVP	CRISPR (Avana) Public 20Q2	0.161
TNNT2	CRISPR (Avana) Public 20Q2	0.161
RIMS2	CRISPR (Avana) Public 20Q2	0.161
C19orf38	CRISPR (Avana) Public 20Q2	-0.161
SPIDR	CRISPR (Avana) Public 20Q2	0.161
PARP10	CRISPR (Avana) Public 20Q2	0.16
DOCK3	CRISPR (Avana) Public 20Q2	-0.159
CSMD3	CRISPR (Avana) Public 20Q2	0.159
DSTN	CRISPR (Avana) Public 20Q2	0.158
LSM5	CRISPR (Avana) Public 20Q2	0.157
BMF	CRISPR (Avana) Public 20Q2	-0.157
RBM18	CRISPR (Avana) Public 20Q2	-0.156
GPR137B	CRISPR (Avana) Public 20Q2	0.156
ABRA	CRISPR (Avana) Public 20Q2	0.155
BGN	CRISPR (Avana) Public 20Q2	-0.154
RCAN3	CRISPR (Avana) Public 20Q2	0.154
POLA1	CRISPR (Avana) Public 20Q2	0.154
STK3	CRISPR (Avana) Public 20Q2	0.154
PYROXD1	CRISPR (Avana) Public 20Q2	-0.154
C1orf109	CRISPR (Avana) Public 20Q2	-0.153
WRAP73	CRISPR (Avana) Public 20Q2	-0.153
TMEM64	CRISPR (Avana) Public 20Q2	0.153
PACC1	CRISPR (Avana) Public 20Q2	0.152
C5orf51	CRISPR (Avana) Public 20Q2	0.152
ILK	CRISPR (Avana) Public 20Q2	-0.152
CYP4F11	CRISPR (Avana) Public 20Q2	0.152
KRT74	CRISPR (Avana) Public 20Q2	0.152
C8orf37	CRISPR (Avana) Public 20Q2	0.152
LYPD2	CRISPR (Avana) Public 20Q2	0.152
PRR14L	CRISPR (Avana) Public 20Q2	0.151
ZNF551	CRISPR (Avana) Public 20Q2	0.151
AK3	CRISPR (Avana) Public 20Q2	0.15
WDR33	CRISPR (Avana) Public 20Q2	0.15
FSD1L	CRISPR (Avana) Public 20Q2	0.15
ESRP1	CRISPR (Avana) Public 20Q2	0.15
KCNK12	CRISPR (Avana) Public 20Q2	-0.15
TPGS1	CRISPR (Avana) Public 20Q2	-0.149
TPRX1	CRISPR (Avana) Public 20Q2	-0.149
RETREG3	CRISPR (Avana) Public 20Q2	-0.149
HOXD12	CRISPR (Avana) Public 20Q2	0.149
WDHD1	CRISPR (Avana) Public 20Q2	0.149
PLEKHA5	CRISPR (Avana) Public 20Q2	0.149
C5AR1	CRISPR (Avana) Public 20Q2	-0.147
KBTBD2	CRISPR (Avana) Public 20Q2	0.147
ZBTB49	CRISPR (Avana) Public 20Q2	0.146
DDI2	CRISPR (Avana) Public 20Q2	0.145
CCNE2	Expression Public 20Q2	-0.309
UBR7	Expression Public 20Q2	-0.246
TCEAL2	Expression Public 20Q2	-0.243
SYNJ1	Expression Public 20Q2	-0.238
CDKN2C	Expression Public 20Q2	-0.229
REEP1	Expression Public 20Q2	-0.226
USP1	Expression Public 20Q2	-0.221
PCDH11X	Expression Public 20Q2	-0.22
DONSON	Expression Public 20Q2	-0.22
CNIH2	Expression Public 20Q2	-0.218
AGBL4	Expression Public 20Q2	-0.215
KCNA1	Expression Public 20Q2	-0.212
TCF19	Expression Public 20Q2	-0.212
LRRC9	Expression Public 20Q2	-0.211
GPR6	Expression Public 20Q2	-0.21
ATP6V1A	Expression Public 20Q2	-0.209
NPAS4	Expression Public 20Q2	-0.209
PRKACA	Expression Public 20Q2	-0.209
TMEM222	Expression Public 20Q2	-0.208
CDKAL1	Expression Public 20Q2	-0.206
DCTN3	Expression Public 20Q2	-0.206
RPA1	Expression Public 20Q2	-0.205
MMUT	Expression Public 20Q2	-0.202
TMEM179	Expression Public 20Q2	-0.201
CAMK2N2	Expression Public 20Q2	-0.199
IQCC	Expression Public 20Q2	-0.198
CHAF1B	Expression Public 20Q2	-0.198
TMSB15A	Expression Public 20Q2	-0.196
ALG9	Expression Public 20Q2	-0.195
WDR76	Expression Public 20Q2	-0.194
HMGN2	Expression Public 20Q2	-0.193
GPRASP2	Expression Public 20Q2	-0.193
MESP1	Expression Public 20Q2	-0.193
UBE2QL1	Expression Public 20Q2	-0.191
RTN3	Expression Public 20Q2	-0.191
BEX1	Expression Public 20Q2	-0.19
RMI1	Expression Public 20Q2	-0.19
NKX2-2	Expression Public 20Q2	-0.189
SLC16A5	Expression Public 20Q2	0.189
ATP6V0B	Expression Public 20Q2	-0.189
CCDC15	Expression Public 20Q2	-0.189
AMPH	Expression Public 20Q2	-0.188
GAD2	Expression Public 20Q2	-0.188
SLC35A5	Expression Public 20Q2	-0.187
GTF2A1	Expression Public 20Q2	-0.186
RTN1	Expression Public 20Q2	-0.186
UCK1	Expression Public 20Q2	-0.186
TCEAL6	Expression Public 20Q2	-0.185
LCMT2	Expression Public 20Q2	-0.185
GABARAP	Expression Public 20Q2	-0.184
ZDHHC15	Expression Public 20Q2	-0.184
PRADC1	Expression Public 20Q2	-0.183
DYRK1A	Expression Public 20Q2	-0.183
MTURN	Expression Public 20Q2	-0.183
RABIF	Expression Public 20Q2	-0.182
PNPLA8	Expression Public 20Q2	-0.182
ATP4B	Expression Public 20Q2	-0.182
EXOSC9	Expression Public 20Q2	-0.181
TTLL7	Expression Public 20Q2	-0.181
GRK1	Expression Public 20Q2	-0.181
SCN4B	Expression Public 20Q2	-0.181
C6orf89	Expression Public 20Q2	-0.18
SEPTIN3	Expression Public 20Q2	-0.18
FOXD4L5	Expression Public 20Q2	-0.179
TTC3	Expression Public 20Q2	-0.179
STMN1	Expression Public 20Q2	-0.179
C1orf232	Expression Public 20Q2	-0.179
PRR19	Expression Public 20Q2	-0.179
KRTAP5-3	Expression Public 20Q2	-0.178
ZBTB8B	Expression Public 20Q2	-0.178
NAPG	Expression Public 20Q2	-0.178
GDAP1	Expression Public 20Q2	-0.177
HCFC2	Expression Public 20Q2	-0.177
PTS	Expression Public 20Q2	-0.177
C1orf216	Expression Public 20Q2	-0.177
RRM1	Expression Public 20Q2	-0.177
TEX9	Expression Public 20Q2	-0.177
PPP6C	Expression Public 20Q2	-0.176
RAB23	Expression Public 20Q2	-0.176
PIK3R3	Expression Public 20Q2	-0.176
NPPA	Expression Public 20Q2	-0.175
IPO9	Expression Public 20Q2	-0.175
WDR7	Expression Public 20Q2	-0.175
VAX2	Expression Public 20Q2	-0.175
KIDINS220	Expression Public 20Q2	-0.175
VPS45	Expression Public 20Q2	-0.175
TNRC6C	Expression Public 20Q2	-0.175
FBLN7	Expression Public 20Q2	-0.175
GRM2	Expression Public 20Q2	-0.175
BARD1	Expression Public 20Q2	-0.174
ARHGAP20	Expression Public 20Q2	-0.174
ASTE1	Expression Public 20Q2	-0.174
TAS1R1	Expression Public 20Q2	-0.174
CIRBP	Expression Public 20Q2	-0.174
TMEM106C	Expression Public 20Q2	-0.173
LSM14B	Expression Public 20Q2	-0.173
NSF	Expression Public 20Q2	-0.173
PDZRN3	Expression Public 20Q2	-0.173
RANBP9	Expression Public 20Q2	-0.173
NAPA	Expression Public 20Q2	-0.173
CES1P2	Copy Number Public 20Q2	0.145
CLUAP1	Copy Number Public 20Q2	0.144
CREBBP	Copy Number Public 20Q2	0.144
C16orf90	Copy Number Public 20Q2	0.143
MIR6126	Copy Number Public 20Q2	0.143
NLRC3	Copy Number Public 20Q2	0.142
TRAP1	Copy Number Public 20Q2	0.138
DNASE1	Copy Number Public 20Q2	0.138
SLX4	Copy Number Public 20Q2	0.136
ACSM2A	Copy Number Public 20Q2	0.135
MIR4516	Copy Number Public 20Q2	0.133
ZNF205	Copy Number Public 20Q2	0.133
ZNF213-AS1	Copy Number Public 20Q2	0.133
CASP16P	Copy Number Public 20Q2	0.133
ZNF213	Copy Number Public 20Q2	0.133
ZNF205-AS1	Copy Number Public 20Q2	0.133
PRSS41	Copy Number Public 20Q2	0.131
SNORA3C	Copy Number Public 20Q2	0.131
PRSS21	Copy Number Public 20Q2	0.131
MMP25	Copy Number Public 20Q2	0.131
MMP25-AS1	Copy Number Public 20Q2	0.131
NRP1	Copy Number Public 20Q2	0.13
IATPR	Copy Number Public 20Q2	0.13
CLDN9	Copy Number Public 20Q2	0.129
CLDN6	Copy Number Public 20Q2	0.129
TNFRSF12A	Copy Number Public 20Q2	0.129
HCFC1R1	Copy Number Public 20Q2	0.129
THOC6	Copy Number Public 20Q2	0.129
SNORA86	Copy Number Public 20Q2	0.129
ITGB1	Copy Number Public 20Q2	0.129
LINC00921	Copy Number Public 20Q2	0.129
ZNF200	Copy Number Public 20Q2	0.129
OR1F1	Copy Number Public 20Q2	0.129
MEFV	Copy Number Public 20Q2	0.129
OR1F2P	Copy Number Public 20Q2	0.129
GOLGA2P6	Copy Number Public 20Q2	0.129
MIR7162	Copy Number Public 20Q2	0.129
SNORD60	Copy Number Public 20Q2	0.129
SNHG19	Copy Number Public 20Q2	0.129
TRAF7	Copy Number Public 20Q2	0.129
ZNF263	Copy Number Public 20Q2	0.128
CRNDE	Copy Number Public 20Q2	0.128
IRX5	Copy Number Public 20Q2	0.128
IL32	Copy Number Public 20Q2	0.127
FLYWCH1	Copy Number Public 20Q2	0.127
FLYWCH2	Copy Number Public 20Q2	0.127
ZNF174	Copy Number Public 20Q2	0.127
ZSCAN10	Copy Number Public 20Q2	0.127
RNPS1	Copy Number Public 20Q2	0.127
CASKIN1	Copy Number Public 20Q2	0.126
PGP	Copy Number Public 20Q2	0.126
BRICD5	Copy Number Public 20Q2	0.126
E4F1	Copy Number Public 20Q2	0.126
MIR3180-5	Copy Number Public 20Q2	0.126
RAB26	Copy Number Public 20Q2	0.126
ZSCAN32	Copy Number Public 20Q2	0.126
OR2C1	Copy Number Public 20Q2	0.126
MTRNR2L4	Copy Number Public 20Q2	0.126
TIGD7	Copy Number Public 20Q2	0.126
ZNF75A	Copy Number Public 20Q2	0.126
DNASE1L2	Copy Number Public 20Q2	0.126
ECI1	Copy Number Public 20Q2	0.126
MYCL	Copy Number Public 20Q2	-0.126
PRSS30P	Copy Number Public 20Q2	0.125
KREMEN2	Copy Number Public 20Q2	0.125
ABCC1	Copy Number Public 20Q2	0.125
PRSS22	Copy Number Public 20Q2	0.125
ACSM3	Copy Number Public 20Q2	0.125
THUMPD1	Copy Number Public 20Q2	0.125
ERI2	Copy Number Public 20Q2	0.125
ZG16B	Copy Number Public 20Q2	0.125
PRSS33	Copy Number Public 20Q2	0.125
NAA60	Copy Number Public 20Q2	0.125
LINC00514	Copy Number Public 20Q2	0.124
PKMYT1	Copy Number Public 20Q2	0.124
PAQR4	Copy Number Public 20Q2	0.124
DNAH3	Copy Number Public 20Q2	0.124
LYRM1	Copy Number Public 20Q2	0.124
ELOB	Copy Number Public 20Q2	0.123
ACSM1	Copy Number Public 20Q2	0.123
RUNX1-IT1	Copy Number Public 20Q2	-0.123
IFI44	Copy Number Public 20Q2	-0.123
ACSM5	Copy Number Public 20Q2	0.123
REXO5	Copy Number Public 20Q2	0.123
ZNF597	Copy Number Public 20Q2	0.123
PDILT	Copy Number Public 20Q2	0.122
DCUN1D3	Copy Number Public 20Q2	0.122
CES1P1	Copy Number Public 20Q2	0.122
MLST8	Copy Number Public 20Q2	0.122
IRX6	Copy Number Public 20Q2	0.122
ADCY9	Copy Number Public 20Q2	0.121
LINC02861	Copy Number Public 20Q2	0.121
MFSD2A	Copy Number Public 20Q2	-0.121
GPRC5B	Copy Number Public 20Q2	0.121
E2F3	Copy Number Public 20Q2	-0.121
LYZL1	Copy Number Public 20Q2	0.119
SOX4	Copy Number Public 20Q2	-0.119
CASC15	Copy Number Public 20Q2	-0.119
LINC00581	Copy Number Public 20Q2	-0.119
CCDC7	Copy Number Public 20Q2	0.119
CCL21	Copy Number (Absolute)	-0.145
FAM205A	Copy Number (Absolute)	-0.145
CNTFR	Copy Number (Absolute)	-0.145
CCL19	Copy Number (Absolute)	-0.144
CCL27	Copy Number (Absolute)	-0.144
IL11RA	Copy Number (Absolute)	-0.144
GALT	Copy Number (Absolute)	-0.144
ARID3C	Copy Number (Absolute)	-0.144
RPP25L	Copy Number (Absolute)	-0.144
DCTN3	Copy Number (Absolute)	-0.144
SIGMAR1	Copy Number (Absolute)	-0.144
CNTFR-AS1	Copy Number (Absolute)	-0.144
FAM219A	Copy Number (Absolute)	-0.143
DNAI1	Copy Number (Absolute)	-0.143
ENHO	Copy Number (Absolute)	-0.143
C9orf24	Copy Number (Absolute)	-0.143
MYORG	Copy Number (Absolute)	-0.143
COLCA1	Copy Number (Absolute)	-0.142
C11orf53	Copy Number (Absolute)	-0.141
NKAPD1	Copy Number (Absolute)	-0.14
PIH1D2	Copy Number (Absolute)	-0.14
ALG9	Copy Number (Absolute)	-0.139
PPP2R1B	Copy Number (Absolute)	-0.139
FAM205BP	Copy Number (Absolute)	-0.139
HSPB2	Copy Number (Absolute)	-0.139
HSPB2-C11orf52	Copy Number (Absolute)	-0.139
CRYAB	Copy Number (Absolute)	-0.139
FDXACB1	Copy Number (Absolute)	-0.139
C11orf1	Copy Number (Absolute)	-0.139
C11orf52	Copy Number (Absolute)	-0.139
DIXDC1	Copy Number (Absolute)	-0.138
DLAT	Copy Number (Absolute)	-0.138
LINC01541	Copy Number (Absolute)	-0.138
SDHD	Copy Number (Absolute)	-0.136
IL18	Copy Number (Absolute)	-0.136
TIMM8B	Copy Number (Absolute)	-0.136
LINC00900	Copy Number (Absolute)	-0.135
MSMP	Copy Number (Absolute)	-0.135
RGP1	Copy Number (Absolute)	-0.135
APLP2	Copy Number (Absolute)	-0.135
CA9	Copy Number (Absolute)	-0.134
TPM2	Copy Number (Absolute)	-0.134
TLN1	Copy Number (Absolute)	-0.134
GBA2	Copy Number (Absolute)	-0.134
CREB3	Copy Number (Absolute)	-0.134
CD72	Copy Number (Absolute)	-0.134
FAM166B	Copy Number (Absolute)	-0.134
TESK1	Copy Number (Absolute)	-0.134
MIR4667	Copy Number (Absolute)	-0.134
PHF24	Copy Number (Absolute)	-0.134
DNAJB5	Copy Number (Absolute)	-0.134
UBN2	Copy Number (Absolute)	-0.134
PTENP1	Copy Number (Absolute)	-0.134
ST14	Copy Number (Absolute)	-0.133
NUDT2	Copy Number (Absolute)	-0.133
TMEM215	Copy Number (Absolute)	-0.133
CADM1	Copy Number (Absolute)	-0.133
HIPK2	Copy Number (Absolute)	-0.133
CLEC2L	Copy Number (Absolute)	-0.133
ANXA2P2	Copy Number (Absolute)	-0.133
FMC1-LUC7L2	Copy Number (Absolute)	-0.133
FMC1	Copy Number (Absolute)	-0.133
KLRG2	Copy Number (Absolute)	-0.133
LUC7L2	Copy Number (Absolute)	-0.133
UBAP1	Copy Number (Absolute)	-0.132
BCO2	Copy Number (Absolute)	-0.132
PTS	Copy Number (Absolute)	-0.132
TEX12	Copy Number (Absolute)	-0.132
PLET1	Copy Number (Absolute)	-0.132
TBXAS1	Copy Number (Absolute)	-0.132
SUGT1P1	Copy Number (Absolute)	-0.132
ANKRD18B	Copy Number (Absolute)	-0.132
KIF24	Copy Number (Absolute)	-0.132
CCDC107	Copy Number (Absolute)	-0.132
SIT1	Copy Number (Absolute)	-0.132
RMRP	Copy Number (Absolute)	-0.132
ARHGEF39	Copy Number (Absolute)	-0.132
ATP8B5P	Copy Number (Absolute)	-0.132
RUSC2	Copy Number (Absolute)	-0.132
UNC13B	Copy Number (Absolute)	-0.131
ZBTB44	Copy Number (Absolute)	-0.131
SOCS6	Copy Number (Absolute)	-0.131
COLCA2	Copy Number (Absolute)	-0.131
STOML2	Copy Number (Absolute)	-0.131
C9orf131	Copy Number (Absolute)	-0.131
FANCG	Copy Number (Absolute)	-0.131
VCP	Copy Number (Absolute)	-0.131
FAM214B	Copy Number (Absolute)	-0.131
PIGO	Copy Number (Absolute)	-0.131
NXPE4	Copy Number (Absolute)	-0.131
REXO2	Copy Number (Absolute)	-0.131
NXPE1	Copy Number (Absolute)	-0.131
RBM7	Copy Number (Absolute)	-0.131
TAF1L	Copy Number (Absolute)	-0.13
SNORD121A	Copy Number (Absolute)	-0.13
RDX	Copy Number (Absolute)	-0.13
GLB1L2	Copy Number (Absolute)	-0.13
BTG4	Copy Number (Absolute)	-0.13
NTM	Copy Number (Absolute)	-0.13
UBAP2	Copy Number (Absolute)	-0.129
C6orf223	Mutation Public 20Q2	-0.18
SPIN4	Mutation Public 20Q2	-0.171
RB1	Mutation Public 20Q2	-0.166
NPFF	Mutation Public 20Q2	-0.152
TSPEAR	Mutation Public 20Q2	-0.152
SCGB1A1	Mutation Public 20Q2	-0.148
AKT1	Mutation Public 20Q2	0.141
UBE2D4	Mutation Public 20Q2	-0.139
C3orf18	Mutation Public 20Q2	-0.137
MOSMO	Mutation Public 20Q2	-0.136
S100Z	Mutation Public 20Q2	-0.135
PPIP5K1	Mutation Public 20Q2	-0.135
SERPINC1	Mutation Public 20Q2	-0.134
TOMM20L	Mutation Public 20Q2	-0.134
EEF1B2	Mutation Public 20Q2	0.133
AHCTF1	Mutation Public 20Q2	0.131
SUOX	Mutation Public 20Q2	0.129
HP1BP3	Mutation Public 20Q2	0.129
GMEB1	Mutation Public 20Q2	-0.126
HSCB	Mutation Public 20Q2	-0.126
KCNJ16	Mutation Public 20Q2	0.126
POU1F1	Mutation Public 20Q2	0.126
TMPRSS3	Mutation Public 20Q2	-0.125
TSHZ3	Mutation Public 20Q2	0.125
COX7A2	Mutation Public 20Q2	0.124
CYP2A6	Mutation Public 20Q2	-0.124
PSMA5	Mutation Public 20Q2	-0.123
PPP6C	Mutation Public 20Q2	0.122
AKR1B15	Mutation Public 20Q2	0.122
SPAG16	Mutation Public 20Q2	-0.122
2024-12-01	Mutation Public 20Q2	0.121
SLC20A1	Mutation Public 20Q2	0.12
MEIS1	Mutation Public 20Q2	0.12
ZNF341	Mutation Public 20Q2	0.119
VTI1B	Mutation Public 20Q2	-0.119
ATRX	Mutation Public 20Q2	0.118
GRK2	Mutation Public 20Q2	-0.118
SGK3	Mutation Public 20Q2	0.118
KRBOX4	Mutation Public 20Q2	-0.117
SEC61G	Mutation Public 20Q2	-0.116
RCBTB1	Mutation Public 20Q2	0.116
OR4C13	Mutation Public 20Q2	0.116
ENOSF1	Mutation Public 20Q2	0.115
IL17C	Mutation Public 20Q2	-0.115
SPAG9	Mutation Public 20Q2	-0.115
SCN10A	Mutation Public 20Q2	0.115
MPG	Mutation Public 20Q2	-0.115
C1orf159	Mutation Public 20Q2	-0.115
IDNK	Mutation Public 20Q2	0.114
DOK5	Mutation Public 20Q2	0.114
TDRKH	Mutation Public 20Q2	-0.114
FNIP1	Mutation Public 20Q2	0.114
BIN3	Mutation Public 20Q2	-0.113
SLITRK4	Mutation Public 20Q2	0.113
TPPP2	Mutation Public 20Q2	-0.113
MAPK6	Mutation Public 20Q2	-0.113
CHID1	Mutation Public 20Q2	0.112
C4orf45	Mutation Public 20Q2	-0.112
TTC26	Mutation Public 20Q2	-0.112
TERF1	Mutation Public 20Q2	0.112
KISS1R	Mutation Public 20Q2	-0.112
SLC8A1	Mutation Public 20Q2	0.111
VKORC1	Mutation Public 20Q2	-0.111
DUSP15	Mutation Public 20Q2	-0.111
WDR60	Mutation Public 20Q2	0.11
TMX3	Mutation Public 20Q2	0.11
B3GNT7	Mutation Public 20Q2	-0.11
MAGEH1	Mutation Public 20Q2	0.11
C4orf19	Mutation Public 20Q2	-0.11
PICK1	Mutation Public 20Q2	0.11
HAPLN3	Mutation Public 20Q2	0.109
TUBGCP4	Mutation Public 20Q2	-0.109
NINJ1	Mutation Public 20Q2	-0.109
UBE2J1	Mutation Public 20Q2	-0.109
IFNK	Mutation Public 20Q2	-0.109
MAGEA2	Mutation Public 20Q2	-0.109
RAMP1	Mutation Public 20Q2	-0.109
F13A1	Mutation Public 20Q2	0.109
NFYB	Mutation Public 20Q2	0.108
THBS4	Mutation Public 20Q2	0.108
GUCA1B	Mutation Public 20Q2	-0.108
EDA2R	Mutation Public 20Q2	0.108
HERC3	Mutation Public 20Q2	0.108
TMSB4X	Mutation Public 20Q2	0.107
DUS2	Mutation Public 20Q2	-0.107
KIF22	Mutation Public 20Q2	0.107
PPP1CA	Mutation Public 20Q2	0.107
SCARA3	Mutation Public 20Q2	-0.107
EHD4	Mutation Public 20Q2	0.107
OR6K6	Mutation Public 20Q2	0.106
ZNF70	Mutation Public 20Q2	-0.106
NIPA1	Mutation Public 20Q2	0.106
HTT	Mutation Public 20Q2	0.105
GPI	Mutation Public 20Q2	0.105
ANKAR	Mutation Public 20Q2	0.105
METTL9	Mutation Public 20Q2	0.105
STC1	Mutation Public 20Q2	-0.105
WTAP	Mutation Public 20Q2	0.105
ZNF521	Mutation Public 20Q2	0.104
ZNF254	Mutation Public 20Q2	-0.104

[truncated: 30 more sheets: CDK2, CDK4, CDK6, CDKN1A, CDKN1B, CDKN2A, CDKN2B, CDKN2C, CDKN2D, E2F1, E2F2, E2F3, E2F4, E2F5, E2F6, E2F7, E2F8, KDM5A, KDM5B, RB1 …]
