# Supplementary material for: The FAM53C/DYRK1A axis regulates the G1/S transition of the cell cycle
Source: eLife. 2026 Apr 30;14:RP109708. doi: 10.7554/eLife.109708 (PMC13132546; doi:10.7554/eLife.109708)
Supplement: Supplementary file 5. [file elife-109708-supp5.xlsx]

## Sheet: Suppl File 5 Read Me
Supplementary File 5: RNA-seq analysis of FAM53C knock-down in human RPE-1 cells
The second tab shows the fold-change data comparing FAM53C knock-down to controls.
The third tab shows the gene ontology (GO) term analysis.

## Sheet: FAM53C KD vs. Ctrl
Ensembl gene IDs	symbols	baseMean	log2FoldChange	lfcSE	stat	pvalue	padj
ENSG00000293515	WFDC21P	12.5597	7.05813	1.63807	-4.3088	1.64e-05	7.87e-05
ENSG00000231131	LOC105378305	8.8059	6.54403	1.7565	-3.7256	0.000194849	0.00078034
ENSG00000204993	CRTC1P1	5.00633	5.73346	1.90437	-3.01069	0.00260652	0.00830473
ENSG00000308196	NA	4.60873	5.61103	1.93734	-2.89625	0.00377652	0.0116085
ENSG00000237980	NA	4.38897	5.53971	1.97554	-2.80415	0.00504494	0.0150591
ENSG00000304751	LOC124903491	4.33307	5.52338	1.95469	-2.82571	0.00471767	0.014186
ENSG00000291176	NA	4.30512	5.5152	1.96197	-2.81105	0.00493795	0.0147776
ENSG00000266714	MYO15B	4.08535	5.43876	1.98184	-2.74429	0.00606412	0.0177697
ENSG00000301488	NA	3.85162	5.35346	2.01025	-2.66309	0.00774274	0.0220894
ENSG00000158683	PKD1L1	3.85162	5.35346	2.01025	-2.66309	0.00774274	0.0220894
ENSG00000140835	CHST4	3.85162	5.35346	2.01025	-2.66309	0.00774274	0.0220894
ENSG00000227128	LBX1-AS1	3.82366	5.34425	2.0195	-2.64632	0.00813717	0.0230815
ENSG00000152463	OLAH	3.63185	5.26768	2.04569	-2.57502	0.0100235	0.0277001
ENSG00000243155	NA	3.61788	5.26279	2.04288	-2.57616	0.00999031	0.027627
ENSG00000101605	MYOM1	3.61788	5.26279	2.04288	-2.57616	0.00999031	0.027627
ENSG00000310386	NA	3.6039	5.2579	2.04406	-2.57229	0.0101029	0.0278863
ENSG00000226571	LOC102723690	3.6039	5.2579	2.04406	-2.57229	0.0101029	0.0278863
ENSG00000200152	RNU6-216P	3.38414	5.16605	2.08051	-2.48307	0.0130255	0.0349311
ENSG00000214967	NPIPA7	3.38414	5.16605	2.08051	-2.48307	0.0130255	0.0349311
ENSG00000198574	SH2D1B	3.37016	5.16081	2.07965	-2.48158	0.01308	0.0350483
ENSG00000272808	GCAWKR	3.37016	5.16081	2.07965	-2.48158	0.01308	0.0350483
ENSG00000175264	CHST1	3.35619	5.15556	2.08328	-2.47473	0.0133337	0.0356169
ENSG00000225099	NA	3.34221	5.15028	2.09164	-2.46232	0.0138042	0.0366876
ENSG00000305830	NA	3.34221	5.15028	2.09164	-2.46232	0.0138042	0.0366876
ENSG00000257596	SCAT2	3.34221	5.15028	2.09164	-2.46232	0.0138042	0.0366876
ENSG00000163568	AIM2	3.12245	5.05107	2.12263	-2.37963	0.01733	0.044753
ENSG00000233098	LOC339260	8.71361	5.03186	1.67709	-3.00036	0.00269663	0.00856173
ENSG00000285816	NA	2.90269	4.94453	2.16963	-2.27897	0.022669	0.0565701
ENSG00000261036	NA	2.88871	4.93842	2.16859	-2.27725	0.0227715	0.0567913
ENSG00000306457	NA	2.87474	4.93229	2.17355	-2.26923	0.0232544	0.0577924
ENSG00000272156	NA	2.87474	4.93229	2.17355	-2.26923	0.0232544	0.0577924
ENSG00000207864	MIR27B	2.87474	4.93229	2.17355	-2.26923	0.0232544	0.0577924
ENSG00000168918	INPP5D	8.13433	4.92986	1.71049	-2.88214	0.0039499	0.0120936
ENSG00000272100	NA	2.65497	4.81622	2.223	-2.16654	0.0302699	0.0725568
ENSG00000176040	TMPRSS7	2.65497	4.81622	2.223	-2.16654	0.0302699	0.0725568
ENSG00000267712	LINC03069	7.53094	4.81142	1.71737	-2.80162	0.00508466	0.0151693
ENSG00000298011	NA	2.641	4.80955	2.22536	-2.16125	0.0306761	0.0734615
ENSG00000179930	ZNF648	2.40726	4.67538	2.28717	-2.04418	0.0409355	0.0939874
ENSG00000188873	RPL10AP2	2.40726	4.67538	2.28717	-2.04418	0.0409355	0.0939874
ENSG00000135373	EHF	2.40726	4.67538	2.28717	-2.04418	0.0409355	0.0939874
ENSG00000296068	NA	2.40726	4.67538	2.28717	-2.04418	0.0409355	0.0939874
ENSG00000105472	CLEC11A	6.56804	4.60387	1.75774	-2.6192	0.00881373	0.0247127
ENSG00000257335	MGAM	6.22249	4.52396	1.79158	-2.52513	0.0115656	0.0314564
ENSG00000293636	LOC101929555	5.66104	4.37328	1.84209	-2.37408	0.0175925	0.0453018
ENSG00000230943	LINC02541	5.23948	4.30675	1.84395	-2.33561	0.0195115	0.0495782
ENSG00000116661	FBXO2	10.1373	4.27472	1.3432	-3.1825	0.00146009	0.00490395
ENSG00000170190	SLC16A5	5.15164	4.22978	1.85693	-2.27784	0.0227363	0.0567208
ENSG00000301058	NA	5.03983	4.20053	1.86031	-2.25797	0.0239476	0.0591725
ENSG00000129151	BBOX1	4.51031	4.08174	1.91151	-2.13535	0.0327323	0.0775431
ENSG00000291112	ZNF204P	4.65621	4.07391	1.8894	-2.15619	0.0310685	0.0742704
ENSG00000187013	LINC02875	4.58633	4.05404	1.88512	-2.15055	0.0315117	0.0751389
ENSG00000196220	SRGAP3	4.37441	4.03071	1.9256	-2.09322	0.0363296	0.0847968
ENSG00000229017	NA	4.34646	4.02185	1.91098	-2.10459	0.0353266	0.0828707
ENSG00000188487	INSC	4.34646	4.02185	1.91098	-2.10459	0.0353266	0.0828707
ENSG00000159388	BTG2	237.321	4.0204	0.270217	-14.8784	4.55e-50	2.8e-48
ENSG00000120337	TNFSF18	4.33248	4.01755	1.90862	-2.10495	0.0352954	0.0828213
ENSG00000244694	PTCHD4	30.3597	4.00363	0.732162	-5.46823	4.55e-08	3.05e-07
ENSG00000291077	NA	8.1276	3.94561	1.40859	-2.8011	0.00509289	0.0151884
ENSG00000164796	CSMD3	25.0923	3.94114	0.795394	-4.95496	7.23e-07	4.22e-06
ENSG00000117595	IRF6	7.83796	3.8937	1.44048	-2.70307	0.00687033	0.0198636
ENSG00000152766	ANKRD22	4.13283	3.89044	1.92485	-2.02116	0.043263	0.0986235
ENSG00000160867	FGFR4	4.11885	3.88582	1.92725	-2.01625	0.0437735	0.0996995
ENSG00000293160	LOC105373383	3.87898	3.84814	1.97052	-1.95286	0.0508363	0.113152
ENSG00000255521	CD44-DT	11.5033	3.82473	1.15411	-3.31401	0.000919681	0.00323824
ENSG00000188372	ZP3	7.68024	3.81065	1.40334	-2.71541	0.00661945	0.0192175
ENSG00000306968	NA	3.85716	3.78342	1.96596	-1.92447	0.0542962	0.1195
ENSG00000123560	PLP1	7.1647	3.75528	1.45304	-2.58443	0.00975401	0.0270423
ENSG00000162643	DNAI3	36.5173	3.73207	0.649954	-5.74204	9.35e-09	6.8e-08
ENSG00000278558	TMEM191B	3.57536	3.72684	2.0018	-1.86174	0.0626399	0.13479
ENSG00000197405	C5AR1	14.6933	3.71483	1.01668	-3.6539	0.000258285	0.00101357
ENSG00000256995	LINC02955	7.21276	3.7129	1.42008	-2.61457	0.00893396	0.025024
ENSG00000293269	NA	3.36958	3.63345	2.02508	-1.79423	0.0727771	0.152598
ENSG00000142178	SIK1	323.842	3.59641	1.16539	-3.086	0.0020287	0.00661884
ENSG00000182950	CIMAP1C	6.44951	3.59502	1.49136	-2.41056	0.0159279	0.0415359
ENSG00000293413	NA	10.107	3.5884	1.18935	-3.01711	0.00255197	0.00815961
ENSG00000163380	LMOD3	3.40366	3.58417	2.01615	-1.77773	0.0754476	0.157268
ENSG00000224020	MIR181A2HG	19.9043	3.58271	0.858493	-4.17326	3e-05	0.000138021
ENSG00000283538	NA	3.38969	3.57834	2.02229	-1.76945	0.0768186	0.159555
ENSG00000261150	EPPK1	6.86323	3.57619	1.46066	-2.44833	0.0143519	0.037927
ENSG00000124762	CDKN1A	14163.7	3.55494	0.0750707	-47.3546	0	0
ENSG00000249679	NA	3.10789	3.50997	2.0679	-1.69736	0.0896277	0.180953
ENSG00000234546	LNCTAM34A	53.2984	3.48877	0.510868	-6.82909	8.55e-12	8.43e-11
ENSG00000228630	HOTAIR	3.1839	3.47582	2.05416	-1.69209	0.0906287	0.182522
ENSG00000125965	GDF5	3.16992	3.46992	2.0527	-1.69042	0.0909477	0.182938
ENSG00000227477	STK4-DT	3.16992	3.46992	2.0527	-1.69042	0.0909477	0.182938
ENSG00000205930	EPCIP-AS1	3.16992	3.46992	2.0527	-1.69042	0.0909477	0.182938
ENSG00000297409	NA	3.15595	3.46373	2.05692	-1.68394	0.0921933	0.184874
ENSG00000251235	NA	3.15595	3.46373	2.05692	-1.68394	0.0921933	0.184874
ENSG00000166473	PKD1L2	14.9003	3.44904	0.957281	-3.60295	0.000314623	0.00120934
ENSG00000294269	NA	6.07202	3.44105	1.47798	-2.32822	0.0199007	0.0504334
ENSG00000273001	PFKP-DT	5.81817	3.43507	1.54996	-2.21623	0.0266756	0.0649902
ENSG00000107796	ACTA2	1637.33	3.41858	0.248963	-13.7313	6.6e-43	3.1e-41
ENSG00000297745	NA	2.88812	3.39438	2.10751	-1.61061	0.107265	0.20861
ENSG00000266680	NA	103.482	3.38517	0.377002	-8.97919	2.73e-19	4.61e-18
ENSG00000010610	CD4	6.06418	3.37941	1.50412	-2.24677	0.0246545	0.0606783
ENSG00000198483	ANKRD35	2.93619	3.34584	2.09566	-1.59655	0.110365	0.213417
ENSG00000294983	NA	2.92221	3.33926	2.09731	-1.59216	0.111348	0.214935
ENSG00000184916	JAG2	11.2192	3.31867	1.11738	-2.97004	0.00297764	0.00936461
ENSG00000298741	NA	11.6888	3.31567	1.09869	-3.01784	0.00254586	0.00814324
ENSG00000227388	NA	5.83044	3.31542	1.5186	-2.1832	0.0290208	0.0700528
ENSG00000163071	SPATA18	174.3	3.30817	0.293538	-11.27	1.85e-29	5.42e-28
ENSG00000116299	ELAPOR1	51.6227	3.30604	0.525622	-6.28976	3.18e-10	2.71e-09
ENSG00000163508	EOMES	5.53467	3.29635	1.5153	-2.17537	0.0296021	0.0711715
ENSG00000166816	LDHD	5.53467	3.29635	1.5153	-2.17537	0.0296021	0.0711715
ENSG00000060718	COL11A1	659.34	3.29596	0.183667	-17.9453	5.22e-72	5.71e-70
ENSG00000026751	SLAMF7	5.29479	3.28927	1.57119	-2.09349	0.0363055	0.0847816
ENSG00000184564	SLITRK6	5.62466	3.25561	1.53141	-2.12589	0.0335125	0.0792304
ENSG00000303692	NA	2.64041	3.25444	2.15811	-1.50801	0.131553	0.245487
ENSG00000293256	CBX3P2	2.64041	3.25444	2.15811	-1.50801	0.131553	0.245487
ENSG00000287670	LOC105374852	5.56875	3.24038	1.54775	-2.0936	0.0362955	0.084778
ENSG00000290956	FAM21EP	8.05928	3.22461	1.25681	-2.56571	0.0102965	0.0283487
ENSG00000265282	NA	5.28695	3.22358	1.5372	-2.09705	0.0359891	0.0842067
ENSG00000279879	NA	7.73555	3.20344	1.26567	-2.53102	0.0113731	0.0310043
ENSG00000305442	NA	2.68847	3.20304	2.14504	-1.49323	0.135376	0.251097
ENSG00000188039	NWD1	5.41887	3.19192	1.56119	-2.04455	0.0408991	0.0939569
ENSG00000173406	DAB1	23.5807	3.18488	0.767129	-4.15169	3.3e-05	0.000150933
ENSG00000256262	NA	5.15105	3.17705	1.57089	-2.02245	0.0431301	0.0983754
ENSG00000259070	LINC00639	41.3387	3.16725	0.560712	-5.64861	1.62e-08	1.14e-07
ENSG00000305090	NA	5.09514	3.16217	1.54362	-2.04855	0.0405066	0.0931469
ENSG00000255046	NA	4.85527	3.15408	1.63899	-1.92441	0.0543036	0.1195
ENSG00000249693	SPMAP2L	5.05321	3.15082	1.5531	-2.02873	0.0424859	0.0970825
ENSG00000089847	ANKRD24	13.2366	3.15058	1.02837	-3.06367	0.00218641	0.00709506
ENSG00000144115	THNSL2	5.03924	3.14694	1.56216	-2.01447	0.0439598	0.10008
ENSG00000112245	PTP4A1	37.0774	3.14655	0.601634	-5.23001	1.7e-07	1.07e-06
ENSG00000228288	MGAT4EP	7.94348	3.1463	1.35324	-2.32501	0.0200712	0.0507788
ENSG00000279267	NA	32.2562	3.13516	0.625952	-5.00862	5.48e-07	3.24e-06
ENSG00000173947	CIMAP3	19.3116	3.13384	0.846279	-3.70308	0.000212997	0.000847054
ENSG00000287574	NA	7.42409	3.09437	1.3256	-2.33432	0.0195787	0.0497179
ENSG00000228509	NA	9.32307	3.09393	1.17918	-2.62379	0.00869579	0.0244324
ENSG00000250994	NA	4.87538	3.09002	1.56882	-1.96964	0.0488795	0.109409
ENSG00000286735	NA	7.59794	3.08104	1.30792	-2.35568	0.018489	0.0473115
ENSG00000308082	NA	7.33011	3.0709	1.28822	-2.38384	0.0171329	0.0443071
ENSG00000166407	LMO1	7.54203	3.07	1.31464	-2.33524	0.0195311	0.0496202
ENSG00000293147	SLC9A7P1	4.59358	3.06663	1.6487	-1.86003	0.0628811	0.135238
ENSG00000105327	BBC3	231.186	3.06207	0.247411	-12.3765	3.5e-35	1.26e-33
ENSG00000021300	PLEKHB1	46.6638	3.05825	0.527666	-5.79581	6.8e-09	5.04e-08
ENSG00000273521	NA	9.1033	3.05571	1.18586	-2.57678	0.00997243	0.0275916
ENSG00000114541	FRMD4B	11.6	3.05386	1.02963	-2.96599	0.00301713	0.00947602
ENSG00000267073	NA	4.55165	3.05333	1.63975	-1.86207	0.062593	0.134707
ENSG00000179292	TMEM151A	4.5237	3.04559	1.65204	-1.84353	0.0652519	0.139181
ENSG00000267750	NA	35.018	3.04532	0.591238	-5.15074	2.59e-07	1.59e-06
ENSG00000237886	NALT1	28.1816	3.04392	0.659921	-4.61255	3.98e-06	2.09e-05
ENSG00000215018	COL28A1	4.50972	3.04204	1.66423	-1.8279	0.0675652	0.14316
ENSG00000235169	SMIM1	4.93742	3.03773	1.60625	-1.89119	0.0585986	0.12749
ENSG00000164185	ZNF474	4.89549	3.02676	1.59326	-1.89973	0.057469	0.125518
ENSG00000142583	SLC2A5	12.0299	3.02598	1.06267	-2.84754	0.00440592	0.0133272
ENSG00000197766	CFD	9.36714	3.02243	1.20479	-2.50867	0.0121186	0.0327627
ENSG00000158008	EXTL1	4.86754	3.01814	1.60072	-1.88549	0.0593639	0.128812
ENSG00000161513	FDXR	692.986	3.01701	0.153543	-19.6493	5.86e-86	8.85e-84
ENSG00000304560	NA	7.29432	3.01442	1.33104	-2.2647	0.023531	0.0583552
ENSG00000260425	NA	4.61369	3.00164	1.58589	-1.89271	0.0583961	0.127117
ENSG00000308980	NA	4.61369	3.00164	1.58589	-1.89271	0.0583961	0.127117
ENSG00000242419	PCDHGC4	4.55779	2.98463	1.60892	-1.85505	0.0635893	0.136455
ENSG00000228526	MIR34AHG	53.098	2.97993	0.493662	-6.03639	1.58e-09	1.25e-08
ENSG00000164849	GPR146	9.0775	2.97238	1.17191	-2.53635	0.0112016	0.0306031
ENSG00000294711	NA	4.31791	2.96954	1.66619	-1.78224	0.0747101	0.156069
ENSG00000171219	CDC42BPG	27.3008	2.96783	0.670859	-4.42393	9.69e-06	4.81e-05
ENSG00000123405	NFE2	8.97967	2.95742	1.13708	-2.60088	0.00929845	0.0259247
ENSG00000263011	LOC124903629	4.67573	2.94864	1.62046	-1.81963	0.0688153	0.145488
ENSG00000055163	CYFIP2	402.2	2.92132	0.182904	-15.9719	2.01e-57	1.53e-55
ENSG00000172346	CSDC2	130.638	2.90197	0.325615	-8.91229	5e-19	8.32e-18
ENSG00000107159	CA9	74.5142	2.89584	0.406254	-7.12815	1.02e-12	1.08e-11
ENSG00000165507	DEPP1	133.167	2.89367	0.319759	-9.04954	1.44e-19	2.49e-18
ENSG00000296294	NA	17.6858	2.89064	0.850636	-3.39821	0.000678274	0.00244794
ENSG00000268970	NA	4.09815	2.88555	1.69956	-1.69782	0.0895418	0.180846
ENSG00000115919	KYNU	6.33312	2.8804	1.35374	-2.12773	0.0333594	0.0789142
ENSG00000288560	NA	4.0702	2.87581	1.69689	-1.69475	0.0901232	0.181691
ENSG00000169067	ACTBL2	111.346	2.87388	0.348017	-8.25788	1.48e-16	2.13e-15
ENSG00000168062	BATF2	13.8455	2.87138	1.92652	-1.49045	0.136106	0.252248
ENSG00000309811	NA	4.04225	2.86709	1.71233	-1.67438	0.0940565	0.187756
ENSG00000308136	NA	4.45597	2.86548	1.65995	-1.72625	0.0843026	0.172248
ENSG00000117480	FAAH	4.44199	2.8617	1.65029	-1.73406	0.0829083	0.169974
ENSG00000265678	NA	4.44199	2.8617	1.65029	-1.73406	0.0829083	0.169974
ENSG00000269069	NA	4.44199	2.8617	1.65029	-1.73406	0.0829083	0.169974
ENSG00000088726	TMEM40	10.6493	2.85725	1.04015	-2.74697	0.00601491	0.0176445
ENSG00000295992	NA	10.4654	2.85679	1.0509	-2.71841	0.00655961	0.0190607
ENSG00000291174	FAUP4	5.98144	2.84448	1.41294	-2.01316	0.0440974	0.100329
ENSG00000143847	PPFIA4	50.2904	2.8386	0.490348	-5.78894	7.08e-09	5.24e-08
ENSG00000285894	NA	12.1848	2.81767	0.986723	-2.85559	0.00429571	0.0130422
ENSG00000118307	DNAI7	4.11826	2.8163	1.63688	-1.72053	0.0853358	0.174054
ENSG00000104953	TLE6	4.10429	2.81154	1.64175	-1.71253	0.0867998	0.176334
ENSG00000302535	LOC105376951	4.09031	2.8067	1.65108	-1.69992	0.0891456	0.180135
ENSG00000149201	CCDC81	16.5211	2.80132	0.833063	-3.36268	0.000771897	0.00275656
ENSG00000137975	CLCA2	6.44322	2.80082	1.40197	-1.99777	0.0457419	0.103442
ENSG00000287200	LOC124902947	7.89882	2.78862	1.2056	-2.31305	0.0207197	0.0522169
ENSG00000266904	NA	3.83646	2.78043	1.72867	-1.60843	0.107742	0.209412
ENSG00000286791	NA	3.82249	2.77551	1.73218	-1.60232	0.109084	0.211466
ENSG00000305455	NA	6.1195	2.77296	1.35599	-2.04496	0.0408586	0.0938771
ENSG00000224431	NA	7.60304	2.77172	1.2758	-2.17254	0.029815	0.0716307
ENSG00000177675	CD163L1	39.6963	2.75544	0.536086	-5.13993	2.75e-07	1.68e-06
ENSG00000119938	PPP1R3C	1378.23	2.75175	0.12171	-22.609	3.53e-113	1.13e-110
ENSG00000268894	PLCE1-AS1	4.13837	2.74492	1.68915	-1.62503	0.104157	0.20373
ENSG00000263004	AKAP1-DT	4.13837	2.74492	1.68915	-1.62503	0.104157	0.20373
ENSG00000007516	BAIAP3	12.471	2.74465	1.03139	-2.66111	0.00778838	0.0221963
ENSG00000089127	OAS1	23.419	2.72545	0.70186	-3.88318	0.000103097	0.000434355
ENSG00000273987	NA	5.73986	2.72381	1.40085	-1.94441	0.0518464	0.114993
ENSG00000250318	RPL13AP26	17.4354	2.7238	0.796395	-3.42016	0.000625837	0.00227682
ENSG00000296343	NA	44.3554	2.71895	0.515446	-5.27494	1.33e-07	8.49e-07
ENSG00000214708	LOC105371730	7.95302	2.71818	1.23114	-2.20785	0.0272545	0.0662597
ENSG00000261173	DNAJA2-DT	3.87055	2.71389	1.66808	-1.62696	0.103746	0.203098
ENSG00000273415	LINC02725	8.08494	2.70042	1.23473	-2.18705	0.0287388	0.0694646
ENSG00000304670	NA	5.84383	2.6973	1.36873	-1.97066	0.0487628	0.109163
ENSG00000163431	LMOD1	567.619	2.68997	0.383617	-7.01212	2.35e-12	2.42e-11
ENSG00000280407	NA	29.7292	2.68745	0.628274	-4.27751	1.89e-05	8.97e-05
ENSG00000202441	RNY4P10	3.60272	2.67823	1.7651	-1.51733	0.129184	0.242227
ENSG00000308283	NA	3.57477	2.66765	1.77323	-1.5044	0.132478	0.246955
ENSG00000249035	CLMAT3	3.94656	2.6615	1.70621	-1.55989	0.118786	0.226506
ENSG00000253138	LINC00967	3.94656	2.6615	1.70621	-1.55989	0.118786	0.226506
ENSG00000310312	NA	3.93259	2.6565	1.70474	-1.5583	0.119162	0.227091
ENSG00000129910	CDH15	14.2106	2.65534	1.94567	-1.36474	0.172335	0.303858
ENSG00000155367	PPM1J	7.46543	2.65427	1.21493	-2.18471	0.0289098	0.0698157
ENSG00000258881	NA	5.49215	2.65132	1.42885	-1.85556	0.0635165	0.136335
ENSG00000163017	ACTG2	123.173	2.65108	0.314314	-8.43449	3.33e-17	4.99e-16
ENSG00000231742	LINC01273	7.83722	2.64711	1.24902	-2.11936	0.03406	0.0802921
ENSG00000116745	RPE65	5.86394	2.64511	1.42473	-1.85657	0.0633727	0.136223
ENSG00000291097	HLA-L	5.84996	2.6409	1.43346	-1.84232	0.0654277	0.139465
ENSG00000255306	NA	5.63804	2.63496	1.39069	-1.89471	0.0581304	0.126742
ENSG00000168491	CCDC110	5.25228	2.63468	1.47646	-1.78446	0.0743484	0.155393
ENSG00000258602	LINC01629	13.0056	2.63431	0.943768	-2.79127	0.00525024	0.0156148
ENSG00000256576	LINC02361	12.7937	2.63017	0.922358	-2.85157	0.00435037	0.0131861
ENSG00000132274	TRIM22	1235.87	2.62462	0.125935	-20.841	1.84e-96	3.8e-94
ENSG00000166592	RRAD	298.965	2.6243	0.212279	-12.3625	4.17e-35	1.49e-33
ENSG00000247095	MIR210HG	232.832	2.61478	0.237686	-11.001	3.78e-28	1.06e-26
ENSG00000142235	LMTK3	50.728	2.58349	0.481494	-5.36557	8.07e-08	5.28e-07
ENSG00000127325	BEST3	21.2673	2.57796	0.743895	-3.46549	0.00052927	0.00195029
ENSG00000129204	USP6	5.6302	2.57484	1.44202	-1.78559	0.0741663	0.155152
ENSG00000078237	TIGAR	369.274	2.57227	0.185264	-13.8843	7.88e-44	3.92e-42
ENSG00000126218	F10	3.36899	2.56815	1.80739	-1.42092	0.155341	0.280318
ENSG00000073350	LLGL2	21.2416	2.56449	0.72474	-3.53849	0.00040242	0.00151539
ENSG00000261838	LOC105371361	3.35501	2.56209	1.80552	-1.41903	0.15589	0.281018
ENSG00000082074	FYB1	10.7946	2.56003	1.01333	-2.52636	0.0115251	0.0313714
ENSG00000289835	NA	3.34103	2.55638	1.81018	-1.41222	0.157885	0.283655
ENSG00000304119	NA	3.34103	2.55638	1.81018	-1.41222	0.157885	0.283655
ENSG00000091831	ESR1	5.36238	2.55159	1.40531	-1.81567	0.0694207	0.146665
ENSG00000234335	RPS4XP11	9.03327	2.54568	1.1117	-2.2899	0.022027	0.0551029
ENSG00000064989	CALCRL	17.4689	2.54112	0.781072	-3.25337	0.00114043	0.00392487
ENSG00000293328	NKAPP1	3.6709	2.53853	1.74825	-1.45204	0.14649	0.267495
ENSG00000289847	LOC105377940	8.99135	2.53795	1.12576	-2.25443	0.0241689	0.059611
ENSG00000144452	ABCA12	8.77943	2.53192	1.09977	-2.30222	0.0213229	0.0535715
ENSG00000203797	DDO	22.2537	2.52704	0.693146	-3.64575	0.000266608	0.00104322
ENSG00000251611	FHIP1A-DT	5.0666	2.51337	1.43253	-1.75451	0.0793438	0.163964
ENSG00000121104	FAM117A	81.7114	2.51252	0.370609	-6.77945	1.21e-11	1.17e-10
ENSG00000262691	NA	6.86205	2.50776	1.25175	-2.00341	0.0451338	0.102245
ENSG00000289261	NA	5.41044	2.5051	1.45736	-1.71892	0.0856281	0.174541
ENSG00000160013	PTGIR	3.41705	2.502	1.73471	-1.44232	0.149212	0.271148
ENSG00000260339	HEXA-AS1	6.82012	2.49902	1.23632	-2.02135	0.043244	0.0985939
ENSG00000064270	ATP2C2	9.83743	2.49518	1.05583	-2.36324	0.0181158	0.0464878
ENSG00000261118	LOC101927863	8.39979	2.49479	1.13726	-2.19368	0.0282586	0.0684356
ENSG00000223685	LINC00571	6.42038	2.4946	1.34422	-1.85579	0.0634836	0.1363
ENSG00000147206	NXF3	11.9767	2.49176	0.944629	-2.63782	0.00834412	0.0235927
ENSG00000108309	RUNDC3A	4.79878	2.48471	1.52107	-1.63353	0.102357	0.200909
ENSG00000272836	NA	4.74287	2.46933	1.54774	-1.59544	0.110614	0.213822
ENSG00000235770	LINC00607	10.0275	2.46831	1.11978	-2.20429	0.0275043	0.0667873
ENSG00000158769	F11R	330.828	2.46242	0.196768	-12.5143	6.23e-36	2.3e-34
ENSG00000175600	SUGCT	157.084	2.45903	0.274946	-8.94369	3.76e-19	6.29e-18
ENSG00000111319	SCNN1A	10.5173	2.44986	1.106	-2.21507	0.026755	0.0651327
ENSG00000287691	NA	4.87479	2.44572	1.46275	-1.672	0.0945237	0.188458
ENSG00000290008	LOC124904643	3.12127	2.44207	1.85121	-1.31917	0.187111	0.3242
ENSG00000306320	NA	5.23261	2.44147	1.50595	-1.62122	0.104971	0.205052
ENSG00000250657	NA	10.0515	2.43823	1.03138	-2.36404	0.018077	0.0463956
ENSG00000284948	LOC254896	14.8844	2.43685	0.841145	-2.89706	0.00376679	0.0115808
ENSG00000236305	SLC12A9-AS1	3.46511	2.4353	1.78138	-1.36709	0.171598	0.303104
ENSG00000294824	NA	12.9049	2.42655	0.907414	-2.67414	0.00749209	0.0214494
ENSG00000213889	PPM1N	22.7747	2.42008	0.680987	-3.55379	0.000379721	0.00143821
ENSG00000100197	CYP2D6	8.0581	2.41974	1.14453	-2.11417	0.0345007	0.0811892
ENSG00000213700	RPL17P50	8.59989	2.41866	1.18727	-2.03717	0.0416333	0.0954552
ENSG00000203499	IQANK1	12.9911	2.41842	0.926765	-2.60953	0.00906663	0.0253521
ENSG00000277639	CHD9NB	52.2918	2.41389	0.465069	-5.1904	2.1e-07	1.31e-06
ENSG00000289832	NA	60.7225	2.40871	0.421275	-5.71766	1.08e-08	7.81e-08
ENSG00000172667	ZMAT3	4177.45	2.40459	0.0852563	-28.2042	5.19e-175	7.69e-172
ENSG00000306637	NA	4.55106	2.39671	1.54834	-1.54793	0.12164	0.230923
ENSG00000120262	CCDC170	4.8949	2.3938	1.44725	-1.65404	0.0981194	0.194274
ENSG00000302344	NA	6.57854	2.39328	1.26949	-1.88522	0.0593995	0.128871
ENSG00000273199	NA	6.03676	2.38888	1.38161	-1.72906	0.0837984	0.171433
ENSG00000007933	FMO3	6.55059	2.38617	1.28601	-1.85549	0.0635261	0.136338
ENSG00000078814	MYH7B	8.00833	2.37535	1.13751	-2.08819	0.0367805	0.0857021
ENSG00000287363	CIMIP3	7.85232	2.37468	1.18123	-2.01035	0.0443944	0.100878
ENSG00000197479	PCDHB11	3.16933	2.3736	1.77304	-1.33872	0.180663	0.315136
ENSG00000235385	LINC02154	32.7629	2.36954	0.627964	-3.77336	0.000161062	0.000655048
ENSG00000173991	TCAP	3.15536	2.36724	1.7744	-1.3341	0.18217	0.317241
ENSG00000184524	CEND1	6.31072	2.36714	1.26604	-1.86972	0.061523	0.132755
ENSG00000131080	EDA2R	348.721	2.36458	0.188466	-12.5465	4.16e-36	1.54e-34
ENSG00000233695	NA	59.496	2.35729	0.430162	-5.48001	4.25e-08	2.87e-07
ENSG00000177363	LRRN4CL	19.168	2.35394	0.7626	-3.08674	0.00202367	0.00660375
ENSG00000180155	LYNX1	8.07037	2.3499	1.15424	-2.03588	0.0417626	0.0956845
ENSG00000146555	SDK1	18.1986	2.34618	0.77909	-3.01143	0.00260017	0.00828772
ENSG00000293503	NA	4.58515	2.34374	1.47916	-1.5845	0.113079	0.217521
ENSG00000254064	NA	9.50016	2.34224	1.04799	-2.235	0.0254176	0.0623328
ENSG00000130751	NPAS1	23.0297	2.33848	0.668442	-3.49841	0.000468047	0.00174201
ENSG00000140932	CMTM2	7.65665	2.3376	1.19615	-1.95427	0.0506695	0.112843
ENSG00000159792	PSKH1	1199.96	2.33517	0.121673	-19.1923	4.3e-82	5.89e-80
ENSG00000251179	TMEM92-AS1	11.0898	2.33044	0.992495	-2.34806	0.0188715	0.048162
ENSG00000167971	CASKIN1	9.27427	2.33021	1.04836	-2.22272	0.0262344	0.064036
ENSG00000234899	SOX9-AS1	8.91645	2.32811	1.08959	-2.13668	0.0326241	0.0773429
ENSG00000143590	EFNA3	27.697	2.32353	0.609914	-3.8096	0.000139192	0.000572239
ENSG00000182791	CCDC87	29.4567	2.3214	0.598308	-3.87995	0.000104479	0.000439723
ENSG00000251432	LINC02615	27.2693	2.31893	0.6233	-3.7204	0.000198907	0.000795138
ENSG00000258768	NA	9.39221	2.31724	1.08775	-2.1303	0.0331471	0.0784574
ENSG00000124749	COL21A1	6.13288	2.31473	1.29623	-1.78575	0.0741403	0.155117
ENSG00000010310	GIPR	4.3313	2.31268	1.58225	-1.46164	0.143841	0.263479
ENSG00000234694	CDC20-DT	4.67514	2.31216	1.47768	-1.56472	0.117648	0.224808
ENSG00000151882	CCL28	29.7493	2.30693	0.624982	-3.6912	0.000223199	0.000884177
ENSG00000244556	NA	3.20342	2.29809	1.8253	-1.25902	0.208023	0.35053
ENSG00000212607	SNORA3B	3.20342	2.29809	1.8253	-1.25902	0.208023	0.35053
ENSG00000059804	SLC2A3	2139.05	2.29275	0.0951245	-24.1026	2.35e-128	1.01e-125
ENSG00000186019	ZNF225-AS1	12.1601	2.27881	0.92373	-2.46697	0.0136263	0.0362622
ENSG00000186594	MIR22HG	905.281	2.27462	0.135819	-16.7475	5.91e-63	5.24e-61
ENSG00000274818	NA	8.97065	2.27423	1.05888	-2.14777	0.0317324	0.0755915
ENSG00000205791	LOH12CR2	20.5331	2.26849	0.707738	-3.20526	0.00134939	0.00456598
ENSG00000233828	MIR4280HG	8.34501	2.25504	1.17807	-1.91418	0.0555973	0.121887
ENSG00000164855	TMEM184A	41.1862	2.25098	0.502944	-4.47561	7.62e-06	3.86e-05
ENSG00000226944	NA	5.7253	2.25059	1.35628	-1.65939	0.0970376	0.1926
ENSG00000005187	ACSM3	8.84872	2.24649	1.09236	-2.05654	0.03973	0.091668
ENSG00000279422	NA	5.52735	2.2398	1.41053	-1.58791	0.112307	0.216351
ENSG00000169314	C22orf15	10.1667	2.23739	0.991441	-2.2567	0.0240266	0.0593371
ENSG00000173597	SULT1B1	35.2993	2.23646	0.540437	-4.13825	3.5e-05	0.000159158
ENSG00000124140	SLC12A5	5.84324	2.2326	1.29791	-1.72015	0.085405	0.174151
ENSG00000062038	CDH3	16.1558	2.23178	0.798591	-2.79465	0.00519566	0.01547
ENSG00000198932	GPRASP1	8.73691	2.22785	1.06708	-2.0878	0.0368159	0.0857478
ENSG00000256806	C17orf100	56.793	2.22505	0.432762	-5.14152	2.73e-07	1.67e-06
ENSG00000124116	WFDC3	35.0656	2.22474	0.541528	-4.10826	3.99e-05	0.000179251
ENSG00000091428	RAPGEF4	7.34905	2.22292	1.16793	-1.9033	0.0570009	0.124606
ENSG00000188396	DYNLT4	24.2392	2.21937	0.648789	-3.42079	0.000624388	0.00227206
ENSG00000143217	NECTIN4	8.85485	2.21598	1.07892	-2.05389	0.0399863	0.0921063
ENSG00000156804	FBXO32	8316.74	2.21596	0.0785929	-28.1955	6.65e-175	9.04e-172
ENSG00000160460	SPTBN4	8.32319	2.21547	1.15882	-1.91183	0.0558979	0.122463
ENSG00000206113	CFAP99	5.77336	2.21449	1.33713	-1.65615	0.0976922	0.193569
ENSG00000123999	INHA	8.63908	2.21024	1.1311	-1.95406	0.0506945	0.112867
ENSG00000176723	ZNF843	13.5702	2.20596	0.930339	-2.37113	0.0177336	0.0456218
ENSG00000139304	PTPRQ	41.1276	2.20555	0.501297	-4.39969	1.08e-05	5.34e-05
ENSG00000225806	NA	4.3855	2.20258	1.50262	-1.46583	0.142696	0.261874
ENSG00000297567	NA	4.04166	2.19795	1.62355	-1.35379	0.175804	0.308541
ENSG00000290041	NA	19.7099	2.19558	0.724489	-3.03052	0.0024413	0.00783954
ENSG00000221916	C19orf73	5.84938	2.18631	1.32494	-1.65011	0.0989194	0.195526
ENSG00000176971	FIBIN	11.6988	2.18453	0.963174	-2.26805	0.0233262	0.057922
ENSG00000175938	ORAI3	374.458	2.17982	0.2059	-10.5868	3.43e-26	8.72e-25
ENSG00000099377	HSD3B7	78.559	2.17348	0.382646	-5.68014	1.35e-08	9.6e-08
ENSG00000280351	NA	20.4518	2.17101	0.75068	-2.89206	0.0038273	0.0117535
ENSG00000111335	OAS2	7.27132	2.16428	1.25096	-1.7301	0.083612	0.171158
ENSG00000258791	LINC00520	18.3343	2.16207	0.741975	-2.91394	0.00356904	0.0110352
ENSG00000223776	LGALS8-AS1	4.13165	2.1613	1.53308	-1.40978	0.158605	0.284603
ENSG00000185607	NA	2.96968	2.16122	1.87347	-1.15359	0.248667	0.400881
ENSG00000184697	CLDN6	2.96968	2.16122	1.87347	-1.15359	0.248667	0.400881
ENSG00000244578	LINC01391	5.6095	2.16031	1.3165	-1.64095	0.100807	0.19844
ENSG00000180921	FAM83H	447.166	2.15964	0.173917	-12.4176	2.1e-35	7.58e-34
ENSG00000183615	FAM167B	21.9242	2.15775	0.70512	-3.06012	0.00221248	0.00716683
ENSG00000135218	CD36	37.347	2.15554	0.519214	-4.15153	3.3e-05	0.00015095
ENSG00000309183	NA	5.58155	2.15292	1.32011	-1.63086	0.102921	0.201748
ENSG00000266043	MIR3649	5.56757	2.14915	1.32665	-1.61998	0.105236	0.205447
ENSG00000136531	SCN2A	102.352	2.1463	0.330288	-6.49826	8.13e-11	7.29e-10
ENSG00000254389	RHPN1-AS1	8.32534	2.1403	1.09251	-1.95908	0.0501036	0.111719
ENSG00000005238	ATOSB	1746.72	2.1381	0.107523	-19.8851	5.48e-88	8.85e-86
ENSG00000229619	MBNL1-AS1	210.436	2.12246	0.236351	-8.98013	2.7e-19	4.58e-18
ENSG00000156042	CFAP70	5.62961	2.11707	1.33383	-1.58721	0.112466	0.216581
ENSG00000275880	NAXD-AS1	11.0892	2.11171	0.967795	-2.18198	0.029111	0.0702185
ENSG00000254991	NA	4.16574	2.1095	1.52497	-1.38331	0.166571	0.296031
ENSG00000267278	NA	27.0606	2.1091	0.623028	-3.38524	0.000711164	0.00255759
ENSG00000259727	NA	32.1485	2.10639	0.563544	-3.73776	0.000185665	0.000747472
ENSG00000189120	SP6	6.88157	2.10528	1.19984	-1.75463	0.0793224	0.163941
ENSG00000265205	NA	3.83587	2.10519	1.64704	-1.27816	0.201193	0.341857
ENSG00000289583	LOC107984709	5.2718	2.1051	1.37285	-1.53337	0.125184	0.236438
ENSG00000201988	NA	4.15176	2.10441	1.52818	-1.37707	0.168491	0.29863
ENSG00000246263	NA	8.88177	2.09669	1.1446	-1.83181	0.0669797	0.142067
ENSG00000188993	LRRC66	7.18348	2.09549	1.26619	-1.65496	0.097933	0.193952
ENSG00000142959	BEST4	3.80792	2.09463	1.6553	-1.26541	0.205724	0.347599
ENSG00000231943	PGM5P4-AS1	12.2294	2.09252	0.898075	-2.33001	0.0198056	0.0502394
ENSG00000205593	DENND6B	72.4464	2.08735	0.397293	-5.25395	1.49e-07	9.44e-07
ENSG00000288955	NA	6.79771	2.08674	1.20747	-1.72819	0.0839544	0.171666
ENSG00000265660	MIR4664	5.70563	2.08369	1.39633	-1.49227	0.135629	0.251451
ENSG00000224424	PRKAR2A-AS1	20.1812	2.08076	0.702923	-2.96015	0.00307491	0.00963709
ENSG00000099937	SERPIND1	10.2237	2.0786	1.07617	-1.93148	0.0534235	0.117993
ENSG00000145703	IQGAP2	13.8313	2.07019	0.891038	-2.32334	0.0201606	0.0509813
ENSG00000232859	LYRM9	27.0215	2.06509	0.628744	-3.28446	0.00102177	0.00356004
ENSG00000204257	HLA-DMA	21.0955	2.06467	0.683162	-3.02222	0.00250928	0.00804045
ENSG00000293037	NA	4.22777	2.06262	1.5934	-1.29448	0.1955	0.334503
ENSG00000101222	SPEF1	9.18982	2.05957	1.0307	-1.99823	0.0456916	0.103365
ENSG00000261614	NA	6.51591	2.05276	1.22067	-1.68167	0.0926327	0.185413
ENSG00000226087	LOC105374588	18.4557	2.05136	0.731384	-2.80477	0.00503526	0.0150356
ENSG00000260051	NA	12.8618	2.04847	0.880474	-2.32656	0.0199888	0.0506173
ENSG00000289100	NA	3.86996	2.04716	1.56391	-1.30899	0.190536	0.328203
ENSG00000085465	OVGP1	4.18585	2.04659	1.60413	-1.27583	0.202017	0.342744
ENSG00000106823	ECM2	6.48796	2.04641	1.24227	-1.64732	0.0994926	0.19642
ENSG00000178038	ALS2CL	79.345	2.04605	0.357824	-5.71803	1.08e-08	7.8e-08
ENSG00000162433	AK4	489.276	2.04533	0.162107	-12.6172	1.7e-36	6.35e-35
ENSG00000296162	NA	10.6598	2.04483	0.994677	-2.05577	0.0398047	0.0918047
ENSG00000135679	MDM2	2393.43	2.04465	0.0952065	-21.4759	2.61e-102	6.18e-100
ENSG00000230753	ZNF341-AS1	5.07999	2.03658	1.37824	-1.47766	0.139498	0.257482
ENSG00000152154	TMEM178A	6.94974	2.03449	1.28262	-1.5862	0.112694	0.216918
ENSG00000205129	CFAP96	10.1041	2.0291	0.993788	-2.04179	0.0411728	0.0944524
ENSG00000245248	USP2-AS1	18.3538	2.02472	0.734249	-2.75754	0.00582389	0.0171335
ENSG00000146530	VWDE	7.78798	2.02307	1.10828	-1.82541	0.0679396	0.143916
ENSG00000249042	FAM151B-DT	17.4178	2.02042	0.792443	-2.5496	0.0107846	0.029543
ENSG00000164125	GASK1B	146.31	2.01752	0.265867	-7.58845	3.24e-14	3.93e-13
ENSG00000170379	TCAF2	57.244	2.01708	0.424906	-4.74712	2.06e-06	1.13e-05
ENSG00000111816	FRK	6.87986	2.01668	1.30835	-1.54139	0.123222	0.233247
ENSG00000299041	NA	3.94597	2.00968	1.56113	-1.28732	0.197982	0.337656
ENSG00000301157	NA	3.932	2.00446	1.5563	-1.28796	0.19776	0.337347
ENSG00000240032	LNCSRLR	5.45791	2.00234	1.41861	-1.41148	0.158103	0.283921
ENSG00000080546	SESN1	508.169	2.00153	0.175859	-11.3814	5.17e-30	1.54e-28
ENSG00000198832	SELENOM	388.481	2.00084	0.174583	-11.4607	2.08e-30	6.31e-29
ENSG00000019582	CD74	6.63999	1.99972	1.23265	-1.6223	0.10474	0.204674
ENSG00000299502	NA	5.44394	1.99819	1.42084	-1.40635	0.159621	0.28608
ENSG00000243710	CFAP57	9.73842	1.99764	1.08068	-1.84851	0.0645288	0.137973
ENSG00000175746	LINC02915	9.01812	1.99456	1.0346	-1.92787	0.0538715	0.118774
ENSG00000275993	LOC102724428	2844.89	1.99366	0.0906723	-21.9875	3.79e-107	1.03e-104
ENSG00000164175	SLC45A2	40.2529	1.99346	0.496853	-4.01217	6.02e-05	0.000262414
ENSG00000168386	FILIP1L	715.982	1.99231	0.361823	-5.50632	3.66e-08	2.49e-07
ENSG00000279026	NA	5.1001	1.99155	1.36187	-1.46237	0.14364	0.263193
ENSG00000167723	TRPV3	5.98026	1.99148	1.34451	-1.4812	0.138553	0.255927
ENSG00000176927	EFCAB5	7.16234	1.98969	1.24476	-1.59844	0.109944	0.212801
ENSG00000148219	ASTN2	115.32	1.98904	0.306858	-6.48196	9.05e-11	8.09e-10
ENSG00000168071	CCDC88B	43.8006	1.98904	0.485431	-4.09747	4.18e-05	0.000187035
ENSG00000279722	NA	3.58816	1.98892	1.68679	-1.17912	0.238351	0.388535
ENSG00000137463	MGARP	24.3944	1.98614	0.639699	-3.10481	0.00190404	0.00624084
ENSG00000184368	MAP7D2	5.07215	1.98307	1.38249	-1.43442	0.151452	0.274424
ENSG00000119630	PGF	9.98828	1.97848	0.984493	-2.00964	0.0444689	0.101006
ENSG00000204540	PSORS1C1	11.1704	1.97748	0.931915	-2.12196	0.0338414	0.0798691
ENSG00000160201	U2AF1	123.122	1.97735	1.83353	-1.07844	0.280837	0.439622
ENSG00000138395	CDK15	38.0236	1.97717	0.540439	-3.65845	0.000253748	0.000997205
ENSG00000149557	FEZ1	6.24025	1.977	1.26965	-1.55713	0.11944	0.227513
ENSG00000130066	SAT1	549.81	1.97617	0.152219	-12.9824	1.54e-38	6.22e-37
ENSG00000258586	LINC02274	5.20407	1.97055	1.38224	-1.42563	0.153976	0.278163
ENSG00000217825	NA	6.02833	1.95582	1.2691	-1.54111	0.123291	0.233298
ENSG00000058866	DGKG	10.1683	1.95246	1.03285	-1.89036	0.0587096	0.127697
ENSG00000103184	SEC14L5	3.98006	1.95146	1.62637	-1.19989	0.230182	0.378639
ENSG00000186326	RGS9BP	3.96608	1.94593	1.6274	-1.19573	0.231802	0.380661
ENSG00000174292	TNK1	18.8828	1.94439	0.724278	-2.68459	0.00726189	0.0208709
ENSG00000100024	UPB1	4.8183	1.94338	1.40414	-1.38404	0.166346	0.295761
ENSG00000237595	LINC01275	7.11257	1.94098	1.2541	-1.5477	0.121694	0.230998
ENSG00000272910	NA	3.6502	1.94064	1.60002	-1.21289	0.225172	0.372651
ENSG00000151117	TMEM86A	3.6502	1.94064	1.60002	-1.21289	0.225172	0.372651
ENSG00000288538	NA	3.6502	1.94064	1.60002	-1.21289	0.225172	0.372651
ENSG00000185532	PRKG1	3.6502	1.94064	1.60002	-1.21289	0.225172	0.372651
ENSG00000228741	SPATA13	3.6502	1.94064	1.60002	-1.21289	0.225172	0.372651
ENSG00000254612	DNAJB6P1	93.4685	1.93671	1.33639	-1.44921	0.147278	0.268471
ENSG00000181284	TMEM102	69.9194	1.93564	0.387227	-4.99871	5.77e-07	3.4e-06
ENSG00000166349	RAG1	22.4072	1.93529	0.66421	-2.91367	0.00357212	0.0110426
ENSG00000289523	NA	4.79035	1.93506	1.42235	-1.36046	0.173683	0.305698
ENSG00000289126	NA	13.6787	1.93492	0.837535	-2.31026	0.0208739	0.0525488
ENSG00000133019	CHRM3	25.8874	1.93355	0.61316	-3.15342	0.0016137	0.0053778
ENSG00000172508	CARNS1	16.7926	1.93309	0.827874	-2.33501	0.0195429	0.0496424
ENSG00000108786	HSD17B1	6.9286	1.93069	1.2603	-1.53193	0.12554	0.236862
ENSG00000278384	NA	10.5369	1.92752	1.00309	-1.92159	0.0546577	0.120101
ENSG00000274750	H3C6	53.167	1.9268	0.434007	-4.43957	9.01e-06	4.5e-05
ENSG00000102003	SYP	13.3689	1.91369	0.842944	-2.27025	0.0231925	0.0576912
ENSG00000188747	NOXA1	15.4932	1.91086	0.792474	-2.41125	0.0158979	0.0414814
ENSG00000246575	NA	7.32051	1.91009	1.13237	-1.68681	0.0916397	0.184013
ENSG00000308693	NA	5.7046	1.90992	1.37724	-1.38677	0.165512	0.294534
ENSG00000266473	NA	6.00651	1.90761	1.28172	-1.48832	0.136666	0.253142
ENSG00000228857	ACTR3-AS1	12.8186	1.90666	0.954126	-1.99833	0.045681	0.103356
ENSG00000236546	MYCL-AS1	4.86636	1.90578	1.3825	-1.3785	0.168048	0.297975
ENSG00000260630	SNAI3-AS1	78.6317	1.90319	0.417436	-4.55925	5.13e-06	2.67e-05
ENSG00000198920	KIAA0753	7.27858	1.90127	1.14236	-1.66433	0.0960474	0.190959
ENSG00000174307	PHLDA3	2300.93	1.89891	0.102395	-18.545	8.95e-77	1.07e-74
ENSG00000286874	NA	3.69826	1.89119	1.59284	-1.1873	0.235109	0.384456
ENSG00000279982	NA	3.69826	1.89119	1.59284	-1.1873	0.235109	0.384456
ENSG00000184984	CHRM5	3.69826	1.89119	1.59284	-1.1873	0.235109	0.384456
ENSG00000256812	CAPNS2	9.79476	1.8889	0.990413	-1.90719	0.0564963	0.123608
ENSG00000269843	NA	28.6346	1.88859	0.580471	-3.25354	0.00113975	0.00392362
ENSG00000303764	NA	8.38065	1.88829	1.11821	-1.68867	0.0912819	0.183452
ENSG00000133110	POSTN	53.9449	1.88685	0.459189	-4.1091	3.97e-05	0.000178648
ENSG00000250748	LOC105369187	7.36857	1.88488	1.14075	-1.65231	0.0984716	0.194876
ENSG00000142920	AZIN2	228.491	1.88228	0.259902	-7.24227	4.41e-13	4.89e-12
ENSG00000040731	CDH10	293.098	1.88182	0.204045	-9.22258	2.9e-20	5.31e-19
ENSG00000197093	GAL3ST4	98.6872	1.88045	0.379794	-4.95123	7.37e-07	4.29e-06
ENSG00000117400	MPL	4.9284	1.87237	1.39468	-1.34251	0.179431	0.313551
ENSG00000182372	CLN8	1054.22	1.86887	0.119143	-15.6859	1.89e-55	1.36e-53
ENSG00000183828	NUDT14	126.051	1.86443	0.284546	-6.55228	5.67e-11	5.16e-10
ENSG00000064205	CCN5	3.34044	1.86233	1.73284	-1.07472	0.282498	0.441629
ENSG00000272977	NA	11.5674	1.85973	0.91653	-2.02909	0.0424487	0.0970111
ENSG00000119636	BBOF1	146.767	1.85556	0.296631	-6.25547	3.96e-10	3.34e-09
ENSG00000108830	RND2	8.19896	1.85407	1.09099	-1.69944	0.0892365	0.180297
ENSG00000203780	FANK1	38.304	1.85369	0.521371	-3.55542	0.000377373	0.00142969
ENSG00000198417	MT1F	53.4841	1.85144	0.432591	-4.27987	1.87e-05	8.88e-05
ENSG00000223745	NA	32.8058	1.84454	0.543029	-3.39676	0.000681878	0.00245932
ENSG00000268049	NA	38.8945	1.84394	0.510229	-3.61395	0.000301569	0.00116548
ENSG00000124466	LYPD3	15.8561	1.84257	0.805228	-2.28826	0.0221223	0.055316
ENSG00000299992	NA	5.80072	1.84203	1.27006	-1.45035	0.14696	0.268131
ENSG00000276851	NA	209.474	1.84013	0.229895	-8.00421	1.2e-15	1.62e-14
ENSG00000265519	NA	56.198	1.83918	0.44268	-4.15465	3.26e-05	0.000149156
ENSG00000213057	C1orf220	5.78675	1.83838	1.28031	-1.43589	0.151033	0.273875
ENSG00000289056	NA	20.5167	1.83774	0.69653	-2.63843	0.00832917	0.0235606
ENSG00000273132	LOC124901427	6.2625	1.83759	1.34974	-1.36144	0.173375	0.305329
ENSG00000118898	PPL	140.443	1.83362	0.290123	-6.32014	2.61e-10	2.24e-09
ENSG00000149809	TM7SF2	295.714	1.83207	0.19397	-9.44512	3.55e-21	6.81e-20
ENSG00000288781	LOC105377378	25.5692	1.83121	0.608559	-3.00909	0.00262027	0.00834406
ENSG00000186496	ZNF396	29.1642	1.83117	0.618358	-2.96135	0.00306296	0.00960148
ENSG00000300530	NA	3.73235	1.83117	1.66438	-1.10021	0.27124	0.428162
ENSG00000177000	MTHFR	492.319	1.83112	0.154618	-11.8429	2.34e-32	7.6e-31
ENSG00000236824	BCYRN1	54.981	1.83086	0.466336	-3.92605	8.64e-05	0.000368279
ENSG00000176531	PHLDB3	144.179	1.82508	0.270868	-6.7379	1.61e-11	1.54e-10
ENSG00000177453	NIM1K	8.09101	1.82474	1.08986	-1.67429	0.0940732	0.187767
ENSG00000188958	UTS2B	4.66057	1.82376	1.40919	-1.29419	0.195598	0.334563
ENSG00000151640	DPYSL4	272.071	1.82076	0.201129	-9.0527	1.39e-19	2.42e-18
ENSG00000240135	PSMD12P1	4.94851	1.81972	1.47841	-1.23086	0.218374	0.364206
ENSG00000171291	ZNF439	21.0327	1.81772	0.674709	-2.69408	0.00705836	0.0203613
ENSG00000169026	SLC49A3	4.63262	1.81456	1.40564	-1.29092	0.196733	0.336088
ENSG00000287872	NA	14.3364	1.81126	0.873092	-2.07453	0.0380299	0.0881975
ENSG00000121410	A1BG	4.61865	1.8099	1.41077	-1.28291	0.199523	0.339738
ENSG00000226471	NA	4.61865	1.8099	1.41077	-1.28291	0.199523	0.339738
ENSG00000301639	NA	7.71922	1.80866	1.13732	-1.59029	0.11177	0.215546
ENSG00000291121	NA	4.60467	1.80515	1.42109	-1.27026	0.203993	0.345272
ENSG00000288649	ACTL10	28.4282	1.80359	0.578309	-3.11873	0.0018163	0.00597726
ENSG00000089163	SIRT4	8.41303	1.79853	1.11099	-1.61885	0.105479	0.205873
ENSG00000170271	FAXDC2	141.509	1.79763	0.306865	-5.85806	4.68e-09	3.54e-08
ENSG00000099953	MMP11	174.899	1.7969	0.257092	-6.98934	2.76e-12	2.84e-11
ENSG00000114023	FAM162A	557.096	1.79665	0.164634	-10.913	9.99e-28	2.75e-26
ENSG00000171992	SYNPO	1985.73	1.79557	0.0987733	-18.1787	7.61e-74	8.51e-72
ENSG00000293164	NA	4.72261	1.78944	1.43308	-1.24867	0.211787	0.355399
ENSG00000156869	FRRS1	18.9231	1.78891	0.720003	-2.48459	0.01297	0.034828
ENSG00000305081	NA	5.33495	1.788	1.47897	-1.20895	0.226684	0.374456
ENSG00000258048	NA	6.83905	1.78436	1.16025	-1.53791	0.124072	0.23461
ENSG00000132879	FBXO44	183.379	1.7836	0.238995	-7.46292	8.46e-14	1e-12
ENSG00000163751	CPA3	63.1223	1.78128	0.395674	-4.50187	6.74e-06	3.44e-05
ENSG00000185669	SNAI3	5.62289	1.78102	1.28508	-1.38592	0.165771	0.294899
ENSG00000242242	NA	24.8502	1.78071	0.667422	-2.66805	0.00762938	0.0217965
ENSG00000276846	NA	4.69466	1.78066	1.42008	-1.25391	0.209875	0.352994
ENSG00000103021	CFAP263	137.016	1.77645	0.272373	-6.52211	6.93e-11	6.25e-10
ENSG00000090238	YPEL3	483.812	1.77613	0.164726	-10.7824	4.17e-27	1.12e-25
ENSG00000279412	NA	13.4802	1.77487	0.854099	-2.07806	0.0377042	0.0875169
ENSG00000260948	NA	6.79713	1.77476	1.17199	-1.51432	0.129946	0.243376
ENSG00000134107	BHLHE40	1790.8	1.77271	0.105465	-16.8085	2.12e-63	1.89e-61
ENSG00000162616	DNAJB4	882.769	1.77085	0.136798	-12.945	2.51e-38	1e-36
ENSG00000136367	ZFHX2	73.6499	1.77065	0.368244	-4.80835	1.52e-06	8.54e-06
ENSG00000042062	RIPOR3	6.49521	1.76923	1.21884	-1.45156	0.146624	0.267637
ENSG00000196605	ZNF846	64.894	1.76877	0.444048	-3.98329	6.8e-05	0.000294571
ENSG00000296607	NA	8.44712	1.76703	1.18381	-1.49267	0.135524	0.251314
ENSG00000262454	MIR193BHG	32.497	1.7647	0.583891	-3.02231	0.00250852	0.00803958
ENSG00000183783	KCTD8	9.01753	1.76421	1.0129	-1.74175	0.0815525	0.167806
ENSG00000258701	VESTAR	12.1941	1.76354	0.883821	-1.99536	0.0460034	0.103912
ENSG00000205978	NYNRIN	35.0278	1.76335	0.526414	-3.34974	0.000808876	0.00287602
ENSG00000198933	TBKBP1	155.52	1.75761	0.277178	-6.3411	2.28e-10	1.97e-09
ENSG00000140675	SLC5A2	3.43657	1.75588	1.63032	-1.07701	0.281476	0.440368
ENSG00000176919	C8G	7.29766	1.75531	1.30882	-1.34113	0.179877	0.314135
ENSG00000130203	APOE	13.0245	1.75414	0.863765	-2.03081	0.0422747	0.0966947
ENSG00000114268	PFKFB4	880.139	1.75388	0.133421	-13.1454	1.81e-39	7.64e-38
ENSG00000170153	RNF150	124.768	1.75369	0.287208	-6.10599	1.02e-09	8.33e-09
ENSG00000222020	HDAC4-AS1	5.65698	1.74623	1.27829	-1.36607	0.171917	0.303295
ENSG00000167105	TMEM92	6.55725	1.74489	1.18583	-1.47145	0.141169	0.259832
ENSG00000286158	NA	7.89136	1.74468	1.09877	-1.58784	0.112321	0.216354
ENSG00000277855	LOC105377155	5.94491	1.74213	1.36866	-1.27287	0.203064	0.344165
ENSG00000304720	NA	50.6729	1.74079	0.458395	-3.79757	0.000146122	0.000598617
ENSG00000162630	B3GALT2	10.3857	1.74033	0.98565	-1.76566	0.0774522	0.160605
ENSG00000197780	TAF13	1009.97	1.73965	0.133009	-13.0792	4.33e-39	1.78e-37
ENSG00000229980	TOB1-AS1	5.35507	1.73869	1.35217	-1.28585	0.198494	0.338423
ENSG00000008118	CAMK1G	28.6069	1.7364	0.617818	-2.81054	0.00494581	0.0147902
ENSG00000149596	JPH2	525.774	1.73573	0.166409	-10.4305	1.8e-25	4.44e-24
ENSG00000186352	ANKRD37	73.5638	1.73504	0.367019	-4.72738	2.27e-06	1.24e-05
ENSG00000259498	NA	6.21341	1.73382	1.31505	-1.31844	0.187355	0.324519
ENSG00000132510	KDM6B	718.743	1.73289	0.169257	-10.2382	1.34e-24	3.13e-23
ENSG00000186862	PDZD7	82.4461	1.73052	0.343842	-5.03289	4.83e-07	2.87e-06
ENSG00000261141	NA	3.10671	1.73016	1.78084	-0.971546	0.331277	0.494466
ENSG00000294313	NA	3.10671	1.73016	1.78084	-0.971546	0.331277	0.494466
ENSG00000288075	LOC105369250	12.2483	1.72948	0.872373	-1.9825	0.0474236	0.106559
ENSG00000147883	CDKN2B	747.817	1.72938	0.139789	-12.3713	3.74e-35	1.34e-33
ENSG00000147573	TRIM55	5.29916	1.72137	1.3297	-1.29456	0.195473	0.334496
ENSG00000251127	NA	5.29916	1.72137	1.3297	-1.29456	0.195473	0.334496
ENSG00000107551	RASSF4	92.459	1.72087	0.326716	-5.26718	1.39e-07	8.83e-07
ENSG00000197181	PIWIL2	10.7442	1.72044	0.962716	-1.78707	0.0739259	0.154728
ENSG00000285294	LINC00842	18.5098	1.7194	0.709428	-2.42365	0.0153655	0.0402532
ENSG00000160588	MPZL3	15.4171	1.71917	0.777618	-2.21082	0.0270482	0.0657875
ENSG00000279863	NA	4.39888	1.71718	1.43182	-1.1993	0.230411	0.378863
ENSG00000162639	HENMT1	5.70504	1.71402	1.30361	-1.31482	0.18857	0.325634
ENSG00000118997	DNAH7	32.7634	1.71319	0.575738	-2.97565	0.00292367	0.00921085
ENSG00000213859	KCTD11	550.899	1.71237	0.148174	-11.5565	6.84e-31	2.11e-29
ENSG00000250222	NA	4.38491	1.71223	1.435	-1.19319	0.232796	0.381727
ENSG00000095539	SEMA4G	80.6436	1.71094	0.386984	-4.42123	9.81e-06	4.87e-05
ENSG00000259721	GREM1-AS1	70.2895	1.70684	0.408647	-4.17682	2.96e-05	0.000136091
ENSG00000256464	NA	3.49861	1.70662	1.70723	-0.999646	0.317482	0.480084
ENSG00000284753	EEF1AKMT4	68.0606	1.70431	0.381496	-4.46744	7.92e-06	3.99e-05
ENSG00000164627	KIF6	44.251	1.70259	0.481566	-3.53553	0.000406956	0.00153141
ENSG00000225234	NA	14.1031	1.70174	0.811967	-2.09583	0.0360975	0.084412
ENSG00000058673	ZC3H11A	11.9246	1.7017	0.879144	-1.93563	0.0529135	0.116962
ENSG00000259345	LOC105370777	20.2	1.70026	0.717323	-2.37029	0.0177741	0.0457188
ENSG00000297106	NA	3.48463	1.70013	1.70847	-0.995117	0.319679	0.482427
ENSG00000289045	NA	7.82761	1.69865	1.1223	-1.51354	0.130142	0.243603
ENSG00000258955	NA	10.152	1.69658	0.994779	-1.70549	0.0881032	0.178338
ENSG00000213626	LBH	7750.4	1.69425	0.103603	-16.3533	4.12e-60	3.39e-58
ENSG00000297827	NA	9.6902	1.6926	0.983955	-1.7202	0.0853968	0.174151
ENSG00000166396	SERPINB7	101.3	1.6925	0.319016	-5.30539	1.12e-07	7.24e-07
ENSG00000143036	SLC44A3	18.2201	1.6906	0.714447	-2.36631	0.0179664	0.0461697
ENSG00000120899	PTK2B	227.984	1.69054	0.228539	-7.39716	1.39e-13	1.61e-12
ENSG00000114853	ZBTB47	1145.69	1.68961	0.118064	-14.3109	1.87e-46	1.03e-44
ENSG00000289827	NA	5.05929	1.6892	1.45755	-1.15893	0.246483	0.398343
ENSG00000273382	NA	60.3141	1.68578	0.417006	-4.04259	5.29e-05	0.000232637
ENSG00000260274	NA	20.0408	1.68525	0.696445	-2.41979	0.0155295	0.0406439
ENSG00000267219	NA	5.78105	1.68407	1.39442	-1.20772	0.227157	0.375024
ENSG00000092295	TGM1	10.3786	1.68284	0.968881	-1.73689	0.082407	0.16928
ENSG00000167733	HSD11B1L	91.535	1.67897	0.326137	-5.14804	2.63e-07	1.61e-06
ENSG00000227268	KLLN	58.1114	1.67627	0.405454	-4.13431	3.56e-05	0.000161552
ENSG00000175170	NA	7.60172	1.67608	1.09829	-1.52608	0.126991	0.239076
ENSG00000286427	NA	3.15477	1.67284	1.67999	-0.995748	0.319373	0.482177
ENSG00000184481	FOXO4	147.281	1.67238	0.263551	-6.34555	2.22e-10	1.91e-09
ENSG00000235065	RPL24P2	7.31378	1.67138	1.14169	-1.46395	0.143207	0.262634
ENSG00000240204	SMKR1	25.8761	1.67023	0.607412	-2.74976	0.00596398	0.0175109
ENSG00000279365	NA	7.57376	1.6702	1.10271	-1.51464	0.129864	0.243279
ENSG00000183508	TENT5C	14.0292	1.67019	0.826267	-2.02137	0.0432418	0.0985939
ENSG00000166145	SPINT1	26.3099	1.66955	0.62217	-2.68344	0.00728696	0.0209208
ENSG00000132141	CCT6B	27.7247	1.66916	0.583788	-2.85918	0.00424731	0.0129049
ENSG00000158525	CPA5	10.2807	1.66904	0.99735	-1.67348	0.0942336	0.187995
ENSG00000196337	CGB7	6.71542	1.66768	1.21827	-1.36889	0.171034	0.302414
ENSG00000196951	SCOC-AS1	6.70144	1.66447	1.2158	-1.36904	0.170988	0.302366
ENSG00000131242	RAB11FIP4	13.9733	1.66406	0.814864	-2.04213	0.0411388	0.0944142
ENSG00000286264	LOC114841035	16.6803	1.66348	0.755405	-2.2021	0.0276583	0.0671113
ENSG00000288873	NA	4.97543	1.66243	1.46102	-1.13786	0.25518	0.408346
ENSG00000261270	NA	6.25363	1.65958	1.22723	-1.35231	0.176278	0.309022
ENSG00000181418	DDN	14.6616	1.65833	0.813633	-2.03818	0.0415322	0.0952502
ENSG00000187229	NA	4.13106	1.65831	1.49095	-1.11225	0.26603	0.421498
ENSG00000151414	NEK7	8004.81	1.65803	0.0796158	-20.8254	2.55e-96	5.19e-94
ENSG00000106560	GIMAP2	6.67349	1.6576	1.21867	-1.36018	0.173773	0.305767
ENSG00000242732	RTL5	54.3859	1.65585	0.422997	-3.91456	9.06e-05	0.000385249
ENSG00000306339	NA	4.94748	1.65545	1.50495	-1.10001	0.27133	0.428162
ENSG00000169933	FRMPD4	22.8679	1.65501	0.6542	-2.52982	0.011412	0.0310792
ENSG00000183196	CHST6	23.3739	1.65288	0.63706	-2.59454	0.00947179	0.026381
ENSG00000188243	COMMD6	393.718	1.65202	0.167979	-9.8347	7.98e-23	1.68e-21
ENSG00000175215	CTDSP2	4208.81	1.65201	0.0856223	-19.2942	6.01e-83	8.6e-81
ENSG00000288927	NA	15.0256	1.65179	0.798535	-2.06852	0.0385908	0.0893967
ENSG00000157343	ARMC12	8.22019	1.6508	1.06703	-1.54709	0.12184	0.231209
ENSG00000160325	CACFD1	291.055	1.64863	0.19614	-8.40538	4.26e-17	6.35e-16
ENSG00000115556	PLCD4	37.0708	1.64737	0.559503	-2.94435	0.00323633	0.0100945
ENSG00000188868	ZNF563	19.0728	1.64654	0.695947	-2.3659	0.0179863	0.0462063
ENSG00000258655	NA	45.1877	1.64641	0.463072	-3.55541	0.000377383	0.00142969
ENSG00000286366	LOC107985694	8.33813	1.64385	1.07408	-1.53046	0.125902	0.237411
ENSG00000180573	H2AC6	188.355	1.64316	0.250035	-6.57174	4.97e-11	4.56e-10
ENSG00000293271	SLC44A3-AS1	4.08913	1.64237	1.49327	-1.09984	0.2714	0.428162
ENSG00000223855	PDGFA-DT	4.08913	1.64237	1.49327	-1.09984	0.2714	0.428162
ENSG00000115257	PCSK4	28.1715	1.64106	0.577184	-2.84322	0.00446597	0.0134864
ENSG00000015568	RGPD5	12.2573	1.64021	0.975029	-1.68222	0.0925258	0.185274
ENSG00000198794	SCAMP5	54.7922	1.63567	0.416532	-3.92687	8.61e-05	0.000367212
ENSG00000270108	NA	9.1266	1.6354	1.02797	-1.5909	0.111632	0.215331
ENSG00000274419	TBC1D3D	21.7673	1.63282	0.702903	-2.32297	0.0201806	0.0510204
ENSG00000309040	NA	5.05145	1.6324	1.35456	-1.20511	0.228159	0.376108
ENSG00000293707	NA	8.26825	1.63006	1.04832	-1.55492	0.119965	0.228407
ENSG00000076604	TRAF4	1456.54	1.6293	0.104226	-15.6324	4.38e-55	3.12e-53
ENSG00000177542	SLC25A22	1724.72	1.62928	0.119773	-13.603	3.84e-42	1.76e-40
ENSG00000148175	STOM	511.99	1.62835	0.153821	-10.586	3.46e-26	8.78e-25
ENSG00000236242	MYO16-AS1	8.25428	1.62741	1.04923	-1.55105	0.12089	0.22974
ENSG00000174125	TLR1	52.6586	1.62522	0.429374	-3.78509	0.000153652	0.000626474
ENSG00000274528	NA	8.2403	1.62478	1.05214	-1.54426	0.122525	0.232196
ENSG00000250362	NA	14.6599	1.62426	0.790559	-2.05458	0.03992	0.091984
ENSG00000205871	RPS3AP47	5.0235	1.62424	1.37308	-1.18291	0.236844	0.386789
ENSG00000261474	NA	20.8056	1.62285	0.67178	-2.41574	0.0157032	0.0410589
ENSG00000288961	LOC124904009	9.36249	1.6223	1.02516	-1.58247	0.113541	0.218214
ENSG00000182600	SNORC	7.39593	1.62181	1.11893	-1.44942	0.147219	0.268424
ENSG00000176125	UFSP1	36.8105	1.62166	0.515098	-3.14826	0.00164243	0.00546015
ENSG00000275074	NUDT18	141.663	1.62159	0.264502	-6.13072	8.75e-10	7.16e-09
ENSG00000124839	RAB17	10.5988	1.62109	0.940689	-1.7233	0.0848343	0.173161
ENSG00000105519	CAPS	22.4058	1.61749	0.667207	-2.42427	0.0153391	0.0401906
ENSG00000246898	NA	93.9561	1.61738	0.32527	-4.97243	6.61e-07	3.87e-06
ENSG00000273143	LOC105378482	10.4109	1.61566	0.969842	-1.6659	0.0957343	0.190406
ENSG00000286288	LOC100289473	20.6379	1.60996	0.677106	-2.37771	0.0174203	0.0449434
ENSG00000064886	CHI3L2	23.2928	1.60977	0.643442	-2.50181	0.0123559	0.0333325
ENSG00000248971	KRT8P46	6.10375	1.60871	1.22916	-1.30878	0.190609	0.328203
ENSG00000213513	NA	6.10375	1.60871	1.22916	-1.30878	0.190609	0.328203
ENSG00000142623	PADI1	50.0927	1.60848	0.455074	-3.53455	0.000408464	0.00153638
ENSG00000230953	NA	4.15117	1.60745	1.46245	-1.09915	0.271704	0.428573
ENSG00000128655	PDE11A	4.83953	1.60737	1.51985	-1.05758	0.290245	0.450286
ENSG00000185055	EFCAB10	5.56129	1.60586	1.44342	-1.11253	0.26591	0.421348
ENSG00000177234	LINC01561	61.4759	1.6042	0.39639	-4.04703	5.19e-05	0.000228701
ENSG00000272405	NA	7.47194	1.60369	1.15147	-1.39273	0.163701	0.291949
ENSG00000173530	TNFRSF10D	3136.17	1.60336	0.0898257	-17.8497	2.91e-71	3.16e-69
ENSG00000196544	BORCS6	64.9961	1.60088	0.401337	-3.98886	6.64e-05	0.0002885
ENSG00000267048	NA	8.69424	1.59948	1.09514	-1.46052	0.144148	0.263944
ENSG00000198246	SLC29A3	19.5358	1.59845	0.765217	-2.08888	0.0367184	0.0855818
ENSG00000250486	FAM218A	12.1236	1.59785	0.871979	-1.83244	0.0668857	0.141923
ENSG00000164695	CHMP4C	148.661	1.59583	0.272084	-5.86522	4.49e-09	3.4e-08
ENSG00000271882	NA	8.39233	1.59506	1.05321	-1.51448	0.129904	0.243326
ENSG00000124613	ZNF391	28.8804	1.59472	0.566946	-2.81282	0.0049109	0.0147047
ENSG00000198003	ODAD3	9.89711	1.59345	0.986443	-1.61535	0.106236	0.207052
ENSG00000258056	CD63-AS1	70.0605	1.59326	0.37083	-4.29646	1.74e-05	8.29e-05
ENSG00000160606	TLCD1	124.094	1.59242	0.290907	-5.47398	4.4e-08	2.96e-07
ENSG00000304368	NA	4.7976	1.59039	1.47153	-1.08078	0.279797	0.438419
ENSG00000274180	NATD1	90.8526	1.58776	0.330989	-4.79703	1.61e-06	8.99e-06
ENSG00000240137	ERICH6-AS1	7.38809	1.58635	1.12933	-1.40469	0.160115	0.286712
ENSG00000120279	MYCT1	4.78362	1.5854	1.46727	-1.08051	0.279914	0.438505
ENSG00000299955	NA	11.7519	1.58493	0.926142	-1.71133	0.0870209	0.176605
ENSG00000224397	PELATON	5.20348	1.58426	1.33791	-1.18413	0.236363	0.386158
ENSG00000142233	NTN5	5.73196	1.58411	1.35775	-1.16672	0.243323	0.394439
ENSG00000307651	LOC124903159	6.15181	1.58152	1.21856	-1.29787	0.194333	0.333104
ENSG00000279118	NA	32.9227	1.57856	0.599276	-2.63411	0.00843576	0.0238166
ENSG00000176714	CCDC121	29.8495	1.57747	0.574119	-2.74764	0.00600268	0.0176118
ENSG00000065357	DGKA	1521.61	1.57651	0.101622	-15.5134	2.82e-54	1.91e-52
ENSG00000308813	NA	4.75567	1.57622	1.47371	-1.06956	0.284817	0.444231
ENSG00000162461	SLC25A34	10.6056	1.57551	1.00734	-1.56403	0.11781	0.225065
ENSG00000154654	NCAM2	20.5282	1.57378	0.676491	-2.32639	0.0199975	0.0506317
ENSG00000115419	GLS	4188.14	1.57274	0.0885568	-17.7597	1.45e-70	1.55e-68
ENSG00000280138	NA	11.4453	1.57253	0.955861	-1.64514	0.09994	0.197149
ENSG00000267577	DNAAF3-AS1	6.55769	1.57169	1.33414	-1.17805	0.238775	0.389125
ENSG00000285976	LOC128125822	27.0145	1.56854	0.650946	-2.40964	0.0159684	0.0416081
ENSG00000182165	TP53TG1	74.8442	1.5644	0.361641	-4.32584	1.52e-05	7.33e-05
ENSG00000143248	RGS5	244.888	1.56254	0.218518	-7.15062	8.64e-13	9.3e-12
ENSG00000179094	PER1	361.498	1.56249	0.184221	-8.48164	2.22e-17	3.36e-16
ENSG00000102796	DHRS12	39.8325	1.56016	0.500508	-3.11716	0.001826	0.00600676
ENSG00000291064	RPL23AP82	148.811	1.55998	0.265484	-5.876	4.2e-09	3.19e-08
ENSG00000231064	THBS3-AS1	37.4019	1.55953	0.497349	-3.13569	0.00171449	0.00567772
ENSG00000250790	NA	7.95066	1.55862	1.09323	-1.4257	0.153955	0.278156
ENSG00000125744	RTN2	196.289	1.55783	0.23311	-6.6828	2.34e-11	2.22e-10
ENSG00000177494	ZBED2	15.0989	1.5574	0.778286	-2.00106	0.0453855	0.102758
ENSG00000268996	MAN1B1-DT	159.528	1.55606	0.253336	-6.14228	8.13e-10	6.67e-09
ENSG00000184110	EIF3C	827.286	1.55586	0.947199	-1.64259	0.100469	0.197916
ENSG00000197980	LEKR1	9.96528	1.55467	0.952124	-1.63284	0.102502	0.201123
ENSG00000224713	NA	12.7823	1.55437	0.861222	-1.80484	0.0711004	0.149621
ENSG00000289074	NA	10.8996	1.55375	0.916844	-1.69467	0.090138	0.181691
ENSG00000124406	ATP8A1	7.13424	1.55317	1.1266	-1.37864	0.168007	0.297967
ENSG00000258405	ZNF578	4.84566	1.55142	1.38143	-1.12305	0.261415	0.416011
ENSG00000259426	KIF23-AS1	51.252	1.55018	0.45349	-3.41833	0.000630057	0.00229013
ENSG00000291146	RP9P	7.12026	1.55007	1.12534	-1.37742	0.168382	0.298471
ENSG00000186472	PCLO	188.932	1.54974	0.236616	-6.54959	5.77e-11	5.25e-10
ENSG00000224550	NA	8.05463	1.5492	1.05658	-1.46624	0.142583	0.261755
ENSG00000183833	CFAP91	8.05463	1.5492	1.05658	-1.46624	0.142583	0.261755
ENSG00000130766	SESN2	657.022	1.54805	0.152519	-10.1499	3.32e-24	7.64e-23
ENSG00000246145	RRS1-DT	9.92335	1.54804	0.965556	-1.60326	0.108876	0.211214
ENSG00000261644	CYLD-AS1	6.45986	1.54695	1.32489	-1.16761	0.242964	0.394062
ENSG00000228532	NA	4.83169	1.54664	1.37719	-1.12304	0.261419	0.416011
ENSG00000232788	ITGA6-AS1	17.3214	1.54574	0.762173	-2.02807	0.0425529	0.0972084
ENSG00000249690	LRBA-AS1	12.8584	1.54466	0.843228	-1.83185	0.0669741	0.142067
ENSG00000249669	NA	15.3735	1.54317	0.813457	-1.89705	0.057821	0.126219
ENSG00000228502	NA	14.6991	1.54205	0.814581	-1.89305	0.0583507	0.127052
ENSG00000254815	LMNTD2-AS1	6.67246	1.54147	1.22338	-1.26001	0.207667	0.350183
ENSG00000172350	ABCG4	5.19563	1.534	1.34795	-1.13803	0.255109	0.40832
ENSG00000180479	ZNF571	16.6299	1.53382	0.773552	-1.98283	0.047387	0.106506
ENSG00000176222	ZNF404	37.2424	1.53054	0.508234	-3.01149	0.00259969	0.00828772
ENSG00000153558	FBXL2	459.972	1.5301	0.158642	-9.64499	5.16e-22	1.04e-20
ENSG00000115252	PDE1A	9.71143	1.52991	0.972853	-1.57261	0.11581	0.221999
ENSG00000290729	NA	5.5681	1.52983	1.44846	-1.05618	0.290886	0.451023
ENSG00000289021	NA	10.1033	1.52864	0.954524	-1.60147	0.109274	0.211701
ENSG00000279080	NA	6.77643	1.52817	1.15665	-1.32121	0.186431	0.323228
ENSG00000144045	DQX1	15.3796	1.52731	0.805334	-1.8965	0.0578941	0.126328
ENSG00000181026	AEN	1685.79	1.52657	0.105622	-14.4532	2.39e-47	1.36e-45
ENSG00000149243	KLHL35	15.5255	1.52568	0.773882	-1.97147	0.0486705	0.109001
ENSG00000171509	RXFP1	5.84206	1.52556	1.23957	-1.23072	0.218429	0.364228
ENSG00000228929	RPS13P2	12.076	1.52479	0.876375	-1.73989	0.081879	0.168372
ENSG00000308391	NA	5.16768	1.52436	1.36646	-1.11555	0.264614	0.419663
ENSG00000279821	NA	28.9945	1.52318	0.583247	-2.61154	0.00901344	0.025225
ENSG00000189052	CGB5	4.9077	1.52225	1.35948	-1.11973	0.262829	0.417562
ENSG00000101335	MYL9	8104.16	1.52144	0.190113	-8.00286	1.22e-15	1.64e-14
ENSG00000145244	CORIN	11.9022	1.52141	0.891377	-1.7068	0.0878583	0.177953
ENSG00000011465	DCN	48.3607	1.52123	0.46477	-3.27308	0.00106383	0.00369363
ENSG00000221949	LINC01465	19.703	1.52014	0.684292	-2.22148	0.0263182	0.0642228
ENSG00000186340	THBS2	14.1488	1.51987	0.856414	-1.77469	0.0759495	0.158132
ENSG00000187608	ISG15	189.565	1.51801	0.244269	-6.21448	5.15e-10	4.28e-09
ENSG00000310323	NA	4.23332	1.51605	1.56871	-0.966428	0.33383	0.496922
ENSG00000044524	EPHA3	50.6484	1.51578	0.44439	-3.41091	0.000647454	0.00234971
ENSG00000198870	STKLD1	14.5073	1.51528	0.802132	-1.88907	0.0588826	0.127988
ENSG00000162645	GBP2	105.283	1.51444	0.300463	-5.04036	4.65e-07	2.77e-06
ENSG00000255248	MIR100HG	1961.28	1.51208	0.0940219	-16.0822	3.4e-58	2.67e-56
ENSG00000123870	NA	7.77283	1.51201	1.07334	-1.4087	0.158923	0.285079
ENSG00000197182	PRR34-AS1	171.783	1.50974	0.242225	-6.23279	4.58e-10	3.83e-09
ENSG00000132793	LPIN3	133.678	1.50973	0.270849	-5.57407	2.49e-08	1.72e-07
ENSG00000173846	PLK3	890.22	1.50664	0.125715	-11.9846	4.28e-33	1.44e-31
ENSG00000267317	NA	102.838	1.50588	0.311768	-4.83012	1.36e-06	7.7e-06
ENSG00000196972	SMIM10L2B	6.40463	1.5058	1.30786	-1.15135	0.24959	0.401947
ENSG00000290782	CFL1P1	11.4303	1.50569	0.922219	-1.63268	0.102536	0.201123
ENSG00000276107	NA	78.723	1.50489	0.353704	-4.25466	2.09e-05	9.86e-05
ENSG00000186792	HYAL3	108.073	1.503	0.298154	-5.04101	4.63e-07	2.76e-06
ENSG00000290114	NA	6.39066	1.50279	1.31969	-1.13874	0.254811	0.407963
ENSG00000178776	C5orf46	83.7687	1.50269	0.337295	-4.45511	8.38e-06	4.21e-05
ENSG00000176171	BNIP3	2782.89	1.502	0.100449	-14.9528	1.49e-50	9.48e-49
ENSG00000187193	MT1X	196.256	1.50116	0.227119	-6.60956	3.85e-11	3.58e-10
ENSG00000206140	TMEM191C	5.25767	1.50043	1.42746	-1.05112	0.293205	0.453455
ENSG00000277758	SYT15B	6.95641	1.50016	1.18469	-1.26629	0.205408	0.347307
ENSG00000180525	DIP2C-AS1	141.884	1.49921	0.262107	-5.71986	1.07e-08	7.72e-08
ENSG00000174963	ZIC4	32.1838	1.49866	0.53377	-2.80768	0.00498997	0.014906
ENSG00000103942	HOMER2	8.34937	1.49831	1.10608	-1.35461	0.17554	0.308145
ENSG00000181458	TMEM45A	344.423	1.49806	0.190109	-7.88002	3.27e-15	4.29e-14
ENSG00000102409	BEX4	113.373	1.49604	0.300938	-4.97126	6.65e-07	3.89e-06
ENSG00000196862	RGPD4	3.91743	1.49445	1.49388	-1.00038	0.317125	0.479761
ENSG00000288784	CTAGE4	3.91743	1.49445	1.49388	-1.00038	0.317125	0.479761
ENSG00000308322	NA	3.91743	1.49445	1.49388	-1.00038	0.317125	0.479761
ENSG00000133138	TBC1D8B	616.645	1.49405	0.13912	-10.7393	6.66e-27	1.77e-25
ENSG00000236682	MAP3K2-DT	22.1923	1.49337	0.643405	-2.32104	0.0202848	0.0512635
ENSG00000198185	ZNF334	13.3385	1.49233	0.918417	-1.62489	0.104185	0.203737
ENSG00000152229	PSTPIP2	221.586	1.49161	0.217885	-6.84583	7.6e-12	7.53e-11
ENSG00000113555	PCDH12	3.90346	1.48871	1.49832	-0.993589	0.320423	0.483003
ENSG00000168026	TTC21A	45.9436	1.48843	0.456257	-3.26226	0.00110528	0.00382082
ENSG00000237399	PITRM1-AS1	7.16049	1.48667	1.19779	-1.24118	0.21454	0.359148
ENSG00000272668	LOC107985216	15.0659	1.48402	0.809216	-1.8339	0.0666686	0.141573
ENSG00000267270	PARD6G-AS1	20.0271	1.484	0.708208	-2.09543	0.0361327	0.0844824
ENSG00000148180	GSN	1496.45	1.4827	0.107814	-13.7524	4.93e-43	2.34e-41
ENSG00000189350	TOGARAM2	9.47769	1.48254	0.983404	-1.50756	0.131666	0.245668
ENSG00000157423	HYDIN	17.9085	1.48199	0.749147	-1.97824	0.0479014	0.10747
ENSG00000210082	NA	24266.4	1.4813	0.0785528	-18.8574	2.56e-79	3.31e-77
ENSG00000105655	ISYNA1	12.8527	1.48106	0.856625	-1.72895	0.0838173	0.17145
ENSG00000264235	MYL12-AS1	5.96614	1.47803	1.25147	-1.18104	0.237587	0.387653
ENSG00000277369	NA	7.27843	1.4744	1.25622	-1.17368	0.240524	0.391155
ENSG00000263535	NA	38.0985	1.47313	0.518416	-2.8416	0.00448879	0.0135528
ENSG00000297487	NA	9.42179	1.47306	0.98622	-1.49364	0.13527	0.250984
ENSG00000151320	AKAP6	31.3858	1.47286	0.556914	-2.64469	0.00817663	0.0231813
ENSG00000150773	PIH1D2	29.8415	1.47283	0.554071	-2.6582	0.007856	0.0223539
ENSG00000139174	PRICKLE1	96.5522	1.47121	0.338542	-4.34572	1.39e-05	6.74e-05
ENSG00000162755	KLHDC9	21.6901	1.47095	0.666142	-2.20817	0.0272326	0.0662163
ENSG00000280231	NA	5.54629	1.47092	1.2941	-1.13663	0.255694	0.408934
ENSG00000236345	SCAT8	17.6492	1.46999	0.754164	-1.94916	0.0512762	0.113929
ENSG00000260193	LINC02846	13.4013	1.46882	0.818396	-1.79476	0.0726921	0.152459
ENSG00000307441	NA	11.6164	1.46828	0.91975	-1.5964	0.1104	0.21346
ENSG00000237638	LINC02245	4.88588	1.46631	1.35906	-1.07891	0.280626	0.439502
ENSG00000235847	NA	5.91024	1.4631	1.23784	-1.18198	0.237212	0.387235
ENSG00000237015	NA	8.47345	1.46238	1.03203	-1.417	0.156483	0.281942
ENSG00000132321	IQCA1	137.554	1.46232	0.278178	-5.25678	1.47e-07	9.31e-07
ENSG00000289507	NA	8.45948	1.45981	1.03702	-1.40769	0.159223	0.285523
ENSG00000063180	CA11	312.709	1.4578	0.191512	-7.61208	2.7e-14	3.3e-13
ENSG00000289393	NA	14.0958	1.45752	0.805272	-1.80997	0.0703	0.148166
ENSG00000230613	HM13-AS1	7.13321	1.45616	1.24509	-1.16952	0.242194	0.393125
ENSG00000197149	RPS2P40	9.61575	1.45595	0.983444	-1.48046	0.13875	0.256219
ENSG00000080854	IGSF9B	4.61192	1.45578	1.41334	-1.03003	0.302998	0.464244
ENSG00000274425	NA	7.55306	1.45512	1.08548	-1.34052	0.180076	0.314361
ENSG00000226310	NA	3.57359	1.455	1.66031	-0.876346	0.380842	0.546794
ENSG00000185860	CCDC190	185.585	1.45326	0.238543	-6.09226	1.11e-09	9.04e-09
ENSG00000256073	NA	41.5803	1.45286	0.482072	-3.01377	0.0025802	0.00823694
ENSG00000072818	ACAP1	21.045	1.45257	0.722472	-2.01056	0.0443717	0.100841
ENSG00000267571	NA	25.6903	1.45171	0.596597	-2.43332	0.0149613	0.0393016
ENSG00000229178	NA	4.59795	1.45058	1.40581	-1.03184	0.302146	0.463462
ENSG00000117425	PTCH2	29.6946	1.44972	0.581009	-2.49518	0.0125895	0.033901
ENSG00000231050	GNB1-DT	6.64665	1.44962	1.1806	-1.22787	0.219498	0.365672
ENSG00000159214	CCDC24	125.239	1.44871	0.284574	-5.09081	3.57e-07	2.15e-06
ENSG00000130635	COL5A1	4.58397	1.44557	1.40375	-1.02979	0.303106	0.464367
ENSG00000196747	H2AC13	7.25115	1.44505	1.16999	-1.2351	0.216794	0.362166
ENSG00000236841	LOC101929532	8.52151	1.44373	1.02225	-1.41231	0.157859	0.283655
ENSG00000164142	FHIP1A	355.141	1.44324	0.174211	-8.28445	1.19e-16	1.72e-15
ENSG00000112972	HMGCS1	1636.85	1.44305	0.107525	-13.4207	4.58e-41	1.99e-39
ENSG00000219607	PPP1R3G	57.4039	1.44082	0.405675	-3.55165	0.000382819	0.00144793
ENSG00000166046	TCP11L2	152.746	1.44054	0.257329	-5.59802	2.17e-08	1.52e-07
ENSG00000185088	RPS27L	2709.59	1.43771	0.0979583	-14.6767	9.09e-49	5.41e-47
ENSG00000169064	ZBBX	4.94792	1.43719	1.37558	-1.04479	0.296121	0.456754
ENSG00000272031	ANKRD34A	156.205	1.43643	0.248615	-5.77771	7.57e-09	5.58e-08
ENSG00000104059	ENTREP2	67.5891	1.4358	0.393241	-3.65118	0.000261036	0.00102313
ENSG00000146374	RSPO3	18.0541	1.43363	0.769822	-1.86229	0.0625618	0.134658
ENSG00000258240	LINC01404	5.5664	1.43357	1.26273	-1.13529	0.256253	0.409669
ENSG00000181029	TRAPPC5	26.713	1.43354	0.586481	-2.4443	0.0145134	0.0382915
ENSG00000300379	NA	24.2863	1.43307	0.615576	-2.32801	0.0199113	0.0504526
ENSG00000125652	ALKBH7	358.553	1.43209	0.173283	-8.26445	1.4e-16	2.03e-15
ENSG00000198894	CIPC	365.814	1.43158	0.170625	-8.39021	4.85e-17	7.2e-16
ENSG00000260751	NA	5.55242	1.42962	1.271	-1.1248	0.260673	0.415107
ENSG00000197582	NA	22.6334	1.42898	0.658328	-2.17062	0.0299601	0.0719369
ENSG00000271447	MMP28	7.32717	1.42833	1.15288	-1.23892	0.215376	0.360166
ENSG00000168890	TMEM150A	277.795	1.42756	0.194202	-7.35087	1.97e-13	2.25e-12
ENSG00000304501	LOC100652768	20.934	1.42708	0.764219	-1.86737	0.0618497	0.133336
ENSG00000075826	SEC31B	98.9999	1.42664	0.318127	-4.48449	7.31e-06	3.71e-05
ENSG00000048740	CELF2	8.5556	1.4225	1.02783	-1.38397	0.166366	0.295764
ENSG00000172006	ZNF554	51.1916	1.42052	0.431196	-3.29437	0.000986431	0.00345018
ENSG00000100344	PNPLA3	168.825	1.42039	0.243005	-5.8451	5.06e-09	3.8e-08
ENSG00000245532	NEAT1	3384.53	1.41775	0.114084	-12.4272	1.86e-35	6.77e-34
ENSG00000293476	NA	46.3057	1.41594	0.449886	-3.14732	0.00164773	0.00547553
ENSG00000293669	PLEKHM1P1	47.6885	1.4159	0.438759	-3.22707	0.00125066	0.00426374
ENSG00000146021	KLHL3	117.096	1.41561	0.290732	-4.86912	1.12e-06	6.41e-06
ENSG00000013523	ANGEL1	389.587	1.41513	0.166456	-8.50153	1.87e-17	2.84e-16
ENSG00000262903	NA	19.336	1.41421	0.770508	-1.83543	0.0664422	0.141148
ENSG00000187808	SOWAHD	3.63563	1.41384	1.55644	-0.908381	0.363677	0.528312
ENSG00000306611	NA	3.63563	1.41384	1.55644	-0.908381	0.363677	0.528312
ENSG00000168497	CAVIN2	83.8648	1.41263	0.354957	-3.97972	6.9e-05	0.000298704
ENSG00000233024	NPIPA9	56.7491	1.41118	1.69109	-0.834479	0.404011	0.569509
ENSG00000163346	PBXIP1	1372.39	1.41055	0.116964	-12.0597	1.72e-33	5.84e-32
ENSG00000178685	PARP10	86.767	1.40995	0.340395	-4.14209	3.44e-05	0.000156862
ENSG00000271040	NA	8.25369	1.40987	1.03986	-1.35583	0.175152	0.307529
ENSG00000272894	NA	6.62484	1.4086	1.15717	-1.21728	0.223498	0.370821
ENSG00000196208	GREB1	18.0136	1.40773	0.721268	-1.95174	0.0509693	0.11334
ENSG00000267060	PTGES3L	3.62166	1.40763	1.55749	-0.903783	0.36611	0.530829
ENSG00000176563	CNTD1	8.23971	1.40716	1.04191	-1.35056	0.176837	0.30972
ENSG00000294343	NA	7.76713	1.40541	1.1442	-1.22829	0.219337	0.365517
ENSG00000264107	MIR4733HG	12.8438	1.40529	0.841319	-1.67034	0.0948517	0.189043
ENSG00000272072	NA	5.00996	1.40348	1.45519	-0.964466	0.334812	0.497748
ENSG00000184675	AMER1	174.368	1.4015	0.255768	-5.47955	4.26e-08	2.88e-07
ENSG00000196872	CRACDL	23.5442	1.4014	0.626446	-2.23707	0.0252818	0.0620556
ENSG00000260475	NA	3.99958	1.40132	1.60103	-0.875262	0.381431	0.547413
ENSG00000260025	CRIM1-DT	196.215	1.40122	0.22698	-6.17331	6.69e-10	5.52e-09
ENSG00000234175	NA	6.20498	1.40028	1.24919	-1.12095	0.262309	0.41702
ENSG00000288999	NA	15.7911	1.39991	0.773093	-1.81079	0.0701728	0.147974
ENSG00000185561	TLCD2	84.7157	1.39964	0.360394	-3.88363	0.000102908	0.000433757
ENSG00000265458	NARF-AS2	54.4605	1.39933	0.420966	-3.3241	0.000887042	0.00313482
ENSG00000225140	DIP2C-AS2	17.0179	1.39871	0.79213	-1.76576	0.0774355	0.160605
ENSG00000162241	SLC25A45	94.8139	1.39852	0.318286	-4.39392	1.11e-05	5.47e-05
ENSG00000138834	MAPK8IP3	1176.33	1.39816	0.110092	-12.6999	5.92e-37	2.24e-35
ENSG00000136274	NACAD	69.876	1.39745	0.397853	-3.51246	0.000443971	0.00165922
ENSG00000280594	BTG3-AS1	15.909	1.39741	0.754088	-1.85311	0.0638665	0.136924
ENSG00000254526	NA	9.31213	1.39467	0.974902	-1.43057	0.152552	0.276015
ENSG00000143412	ANXA9	66.5414	1.39424	0.393771	-3.54074	0.000399001	0.00150356
ENSG00000118298	CA14	6.56893	1.39386	1.19635	-1.16509	0.243981	0.395278
ENSG00000168490	PHYHIP	76.7111	1.39377	0.380078	-3.66707	0.000245343	0.000966824
ENSG00000117266	CDK18	145.937	1.39218	0.263076	-5.29195	1.21e-07	7.77e-07
ENSG00000115896	PLCL1	6.16306	1.39109	1.31002	-1.06188	0.288289	0.44819
ENSG00000275342	PRAG1	289.431	1.39062	0.195888	-7.09906	1.26e-12	1.33e-11
ENSG00000137501	SYTL2	291.149	1.38998	0.188628	-7.36893	1.72e-13	1.97e-12
ENSG00000174586	ZNF497	72.681	1.38994	0.357199	-3.89123	9.97e-05	0.000421503
ENSG00000225159	NPM1P39	6.97481	1.38988	1.29017	-1.07728	0.281355	0.440224
ENSG00000266852	MIR4482	14.2048	1.38894	0.83467	-1.66406	0.0960997	0.19104
ENSG00000261067	NA	6.30895	1.38799	1.18959	-1.16678	0.2433	0.394439
ENSG00000279140	NA	11.9994	1.38704	0.861142	-1.6107	0.107244	0.208594
ENSG00000174669	SLC29A2	83.4458	1.38674	0.351534	-3.94482	7.99e-05	0.000341938
ENSG00000168939	SPRY3	38.2689	1.38672	0.520643	-2.66346	0.00773406	0.0220801
ENSG00000197653	DNAH10	26.846	1.38544	0.605778	-2.28703	0.0221938	0.0554732
ENSG00000166171	DPCD	703.494	1.38202	0.140136	-9.86194	6.09e-23	1.29e-21
ENSG00000304717	NA	12.1034	1.38153	0.877975	-1.57354	0.115594	0.221663
ENSG00000257557	PPP1R12A-AS1	15.0367	1.37892	0.784952	-1.75669	0.078971	0.16338
ENSG00000269821	KCNQ1OT1	21.3037	1.37865	0.652118	-2.11412	0.0345053	0.0811892
ENSG00000279196	NA	5.66252	1.37779	1.26025	-1.09327	0.274277	0.431672
ENSG00000101460	MAP1LC3A	54.3864	1.37434	0.43867	-3.13296	0.0017305	0.00572559
ENSG00000304458	NA	13.7663	1.37298	0.816039	-1.6825	0.0924721	0.185228
ENSG00000182224	CYB5D1	3.68369	1.37182	1.53062	-0.896254	0.370117	0.534934
ENSG00000184441	NA	36.2045	1.36989	0.512866	-2.67105	0.00756141	0.0216175
ENSG00000158887	MPZ	11.0371	1.36966	0.896492	-1.5278	0.126563	0.238299
ENSG00000197497	ZNF665	4.65214	1.36813	1.38036	-0.991141	0.321617	0.484132
ENSG00000119782	FKBP1B	40.0923	1.36813	0.495497	-2.76113	0.00576019	0.0169614
ENSG00000109107	ALDOC	14.6929	1.36704	0.778709	-1.75552	0.0791712	0.163691
ENSG00000175003	SLC22A1	6.96151	1.36677	1.17427	-1.16393	0.244453	0.395846
ENSG00000203778	FAM229B	210.502	1.36545	0.22957	-5.94786	2.72e-09	2.11e-08
ENSG00000168300	PCMTD1	639.572	1.36528	0.147005	-9.28731	1.58e-20	2.93e-19
ENSG00000241769	EOLA1-DT	4.24627	1.36234	1.57606	-0.864394	0.387371	0.553393
ENSG00000169994	MYO7B	5.75251	1.36051	1.29277	-1.0524	0.292617	0.452761
ENSG00000293507	FBXL9P	9.03033	1.36028	0.988733	-1.37578	0.168889	0.29927
ENSG00000250846	EPHA5-AS1	74.2324	1.35886	0.379632	-3.57941	0.000344376	0.00131446
ENSG00000263731	NA	8.27993	1.35794	1.06367	-1.27666	0.201722	0.342353
ENSG00000290644	NA	19.511	1.35652	0.695004	-1.95181	0.0509606	0.113337
ENSG00000103269	RHBDL1	16.4458	1.35601	0.738313	-1.83663	0.0662644	0.140843
ENSG00000102057	KCND1	34.3419	1.35298	0.538147	-2.51415	0.0119318	0.0323221
ENSG00000125246	CLYBL	5.34663	1.35241	1.27937	-1.05709	0.29047	0.450526
ENSG00000125746	EML2	188.067	1.34879	0.227662	-5.92451	3.13e-09	2.42e-08
ENSG00000204815	ODAD4	13.3247	1.34767	0.825613	-1.63233	0.102611	0.201213
ENSG00000232434	AJM1	222.294	1.34345	0.210786	-6.37351	1.85e-10	1.61e-09
ENSG00000196839	ADA	225.287	1.34267	0.212454	-6.31982	2.62e-10	2.25e-09
ENSG00000275183	LENG9	33.939	1.34239	0.537172	-2.49898	0.012455	0.0335704
ENSG00000255224	NA	13.2336	1.34235	2.30691	-0.58188	0.560648	0.712554
ENSG00000267405	NA	39.177	1.34189	0.490226	-2.7373	0.00619467	0.01811
ENSG00000255345	NA	8.76183	1.33954	1.17566	-1.13939	0.254539	0.40758
ENSG00000273151	NA	31.2835	1.33954	0.542778	-2.46793	0.0135897	0.0362
ENSG00000163491	NEK10	74.3963	1.33946	0.359135	-3.72968	0.000191721	0.000769006
ENSG00000114698	PLSCR4	358.409	1.33858	0.18067	-7.40897	1.27e-13	1.48e-12
ENSG00000167508	MVD	947.481	1.338	0.126085	-10.6119	2.62e-26	6.72e-25
ENSG00000174151	CYB561D1	366.687	1.33712	0.168792	-7.92169	2.34e-15	3.1e-14
ENSG00000260604	NA	54.9025	1.33559	0.424085	-3.14934	0.0016364	0.00544343
ENSG00000181409	AATK	8.65854	1.33532	1.04062	-1.28321	0.19942	0.339647
ENSG00000227799	NA	15.7721	1.33498	0.770107	-1.7335	0.0830075	0.170122
ENSG00000164331	ANKRA2	264.751	1.33485	0.195228	-6.8374	8.06e-12	7.98e-11
ENSG00000272172	NA	7.11354	1.33437	1.13074	-1.18008	0.237967	0.388079
ENSG00000239282	CASTOR1	6.37712	1.33232	1.17598	-1.13294	0.257238	0.410824
ENSG00000173928	SWSAP1	57.0285	1.33156	0.414552	-3.21205	0.00131792	0.00447249
ENSG00000169220	RGS14	97.2756	1.33155	0.321789	-4.13795	3.5e-05	0.000159282
ENSG00000278917	NA	7.09956	1.33096	1.12201	-1.18623	0.235533	0.385003
ENSG00000137801	THBS1	110226	1.33052	0.0842377	-15.7948	3.38e-56	2.5e-54
ENSG00000234840	LINC01239	12.7403	1.3301	0.846069	-1.57209	0.11593	0.2221
ENSG00000267475	NA	22.5892	1.32839	0.631601	-2.10321	0.0354473	0.08313
ENSG00000270194	GOLGA4-AS1	69.657	1.32832	0.363353	-3.65574	0.000256441	0.00100657
ENSG00000129472	RAB2B	498.184	1.32773	0.148749	-8.92597	4.42e-19	7.36e-18
ENSG00000278616	NA	13.6668	1.32501	0.856614	-1.5468	0.121911	0.231248
ENSG00000170417	TMEM182	23.8462	1.32482	0.616296	-2.14965	0.0315828	0.0752791
ENSG00000122367	LDB3	11.7439	1.32445	0.875307	-1.51313	0.130248	0.243699
ENSG00000162783	IER5	1857.23	1.32393	0.0997022	-13.2789	3.07e-40	1.33e-38
ENSG00000232480	NA	3.71778	1.32369	1.54714	-0.855569	0.392236	0.558241
ENSG00000110455	ACCS	49.1148	1.32341	0.429571	-3.08076	0.00206473	0.00672831
ENSG00000224985	NA	6.33519	1.3207	1.20793	-1.09336	0.274237	0.431672
ENSG00000267796	LIN37	15.4337	1.32061	0.779191	-1.69484	0.0901048	0.181691
ENSG00000237310	LINC03011	20.0058	1.32049	0.68376	-1.93121	0.0534566	0.11805
ENSG00000196196	HRCT1	18.183	1.31949	0.714754	-1.84608	0.0648808	0.138534
ENSG00000231890	DARS1-AS1	11.1394	1.31923	0.934705	-1.41139	0.15813	0.283938
ENSG00000307823	NA	24.8488	1.31875	0.602674	-2.18817	0.0286576	0.0692813
ENSG00000104881	PPP1R13L	1431.18	1.31864	0.111612	-11.8145	3.28e-32	1.06e-30
ENSG00000102878	HSF4	40.2545	1.31824	0.486518	-2.70954	0.00673764	0.0195155
ENSG00000019144	PHLDB1	3347.5	1.31822	0.0904389	-14.5758	4e-48	2.35e-46
ENSG00000289015	NA	5.36674	1.31561	1.27706	-1.03019	0.302921	0.46417
ENSG00000166246	DNAAF8	14.7818	1.31543	0.787959	-1.66941	0.0950356	0.189299
ENSG00000282164	PEG13	4.80417	1.31451	1.4929	-0.880511	0.378583	0.544221
ENSG00000304541	NA	179.33	1.31448	0.236203	-5.56504	2.62e-08	1.81e-07
ENSG00000006534	ALDH3B1	1136.83	1.3142	0.111748	-11.7604	6.24e-32	2.01e-30
ENSG00000139263	LRIG3	530.821	1.31409	0.153046	-8.58624	8.99e-18	1.39e-16
ENSG00000289092	NA	11.442	1.31382	0.879217	-1.49431	0.135095	0.250717
ENSG00000167566	NCKAP5L	1078.4	1.31365	0.11484	-11.4389	2.67e-30	8.07e-29
ENSG00000030110	BAK1	645.949	1.31323	0.146377	-8.97155	2.92e-19	4.92e-18
ENSG00000140297	GCNT3	9.53301	1.31271	1.01265	-1.29631	0.194867	0.333845
ENSG00000231652	CD109-AS1	7.5643	1.31115	1.23382	-1.06267	0.287933	0.447807
ENSG00000126709	IFI6	219.006	1.30914	0.217968	-6.00609	1.9e-09	1.5e-08
ENSG00000272288	ILRUN-AS1	13.063	1.30861	0.83735	-1.5628	0.1181	0.225434
ENSG00000187583	PLEKHN1	201.796	1.30773	0.238718	-5.47815	4.3e-08	2.9e-07
ENSG00000111653	ING4	379.86	1.30741	0.183096	-7.14059	9.29e-13	9.95e-12
ENSG00000244945	RUFY1-AS1	4.3983	1.30717	1.39996	-0.933718	0.350449	0.515478
ENSG00000099282	TSPAN15	88.3928	1.3067	0.350676	-3.72622	0.000194375	0.000778692
ENSG00000164070	HSPA4L	679.968	1.30525	0.133434	-9.78199	1.35e-22	2.79e-21
ENSG00000167861	HID1	12.2264	1.30411	0.865493	-1.50679	0.131865	0.245954
ENSG00000160602	NEK8	84.5731	1.30259	0.342551	-3.80262	0.000143176	0.000588024
ENSG00000305069	NA	30.4582	1.30235	0.555744	-2.34343	0.0191074	0.0486803
ENSG00000234072	GTF3C2-AS2	92.2685	1.30009	0.326979	-3.97606	7.01e-05	0.000302858
ENSG00000135114	OASL	7.1057	1.29982	1.10726	-1.1739	0.240433	0.391123
ENSG00000070182	SPTB	11.476	1.29862	0.876267	-1.482	0.138341	0.255753
ENSG00000204604	ZNF468	167.973	1.29819	0.239614	-5.41783	6.03e-08	4.01e-07
ENSG00000177106	EPS8L2	596.484	1.29807	0.149129	-8.70432	3.19e-18	5.08e-17
ENSG00000135924	DNAJB2	1262.91	1.29805	0.114166	-11.3699	5.91e-30	1.76e-28
ENSG00000130518	IQCN	30.0298	1.29728	0.549855	-2.35931	0.0183091	0.0469396
ENSG00000267309	ZNF566-AS1	22.1295	1.29674	0.644316	-2.01258	0.0441587	0.100455
ENSG00000227764	NTRAS	4.37034	1.29673	1.40723	-0.921476	0.356802	0.521411
ENSG00000250616	YPEL3-DT	4.37034	1.29673	1.40723	-0.921476	0.356802	0.521411
ENSG00000130653	PNPLA7	37.2115	1.29486	0.494125	-2.62052	0.00877958	0.0246393
ENSG00000104808	DHDH	8.72671	1.29419	1.01498	-1.27509	0.202277	0.34308
ENSG00000261888	NA	18.1479	1.29318	0.716241	-1.80552	0.0709941	0.149416
ENSG00000246228	CASC8	15.5724	1.29316	0.762434	-1.6961	0.0898672	0.181302
ENSG00000260273	NA	5.42878	1.29165	1.27902	-1.00988	0.312555	0.474563
ENSG00000288018	LOC101929174	8.84465	1.29022	0.996452	-1.29481	0.195386	0.334453
ENSG00000176658	MYO1D	8.13619	1.28972	1.05755	-1.21955	0.222637	0.369808
ENSG00000285018	NA	26.8979	1.28954	0.592316	-2.17711	0.0294726	0.0709228
ENSG00000197568	ANKRD13C-DT	91.0933	1.28842	0.338385	-3.80755	0.000140349	0.000576705
ENSG00000139899	CBLN3	32.8139	1.28769	0.532258	-2.41929	0.0155507	0.0406862
ENSG00000304994	NA	5.05086	1.28757	1.34081	-0.96029	0.336909	0.500273
ENSG00000135951	TSGA10	16.1265	1.28706	0.797085	-1.61471	0.106373	0.207244
ENSG00000203772	SPRN	5.73137	1.28663	1.35723	-0.947986	0.343136	0.507671
ENSG00000233396	NA	10.5976	1.28595	0.922292	-1.39429	0.163229	0.291235
ENSG00000138685	FGF2	3745.03	1.28561	0.0915153	-14.048	7.92e-45	4.05e-43
ENSG00000228701	TNKS2-DT	7.18171	1.28493	1.11646	-1.1509	0.249773	0.402107
ENSG00000184156	KCNQ3	10.9615	1.28417	0.942074	-1.36313	0.17284	0.304552
ENSG00000179454	KLHL28	252.229	1.28328	0.201448	-6.37028	1.89e-10	1.64e-09
ENSG00000289511	NA	46.0002	1.2825	0.495597	-2.58778	0.00965972	0.0268128
ENSG00000299605	NA	9.64311	1.28214	1.00413	-1.27687	0.20165	0.342265
ENSG00000251580	LINC02482	21.8764	1.28173	0.729344	-1.75738	0.0788539	0.163221
ENSG00000187609	EXD3	160.234	1.2814	0.248138	-5.16404	2.42e-07	1.49e-06
ENSG00000128394	APOBEC3F	38.6602	1.28031	0.524146	-2.44266	0.0145794	0.0384409
ENSG00000189195	BTBD8	61.0432	1.27876	0.386642	-3.30735	0.000941841	0.0033064
ENSG00000124098	FAM210B	806.8	1.2752	0.12468	-10.2278	1.49e-24	3.47e-23
ENSG00000119431	HDHD3	137.681	1.27498	0.261429	-4.87696	1.08e-06	6.18e-06
ENSG00000180332	KCTD4	136.132	1.27477	0.264725	-4.81546	1.47e-06	8.26e-06
ENSG00000307654	NA	6.21326	1.27429	1.21952	-1.04491	0.296064	0.456709
ENSG00000265750	NA	3.38792	1.27405	1.59759	-0.797483	0.425171	0.590081
ENSG00000066248	NGEF	5.83534	1.2736	1.30859	-0.973266	0.330421	0.493806
ENSG00000258311	NA	29.7021	1.27307	0.553327	-2.30075	0.0214056	0.0537462
ENSG00000177854	TMEM187	187.916	1.27298	0.232377	-5.47806	4.3e-08	2.9e-07
ENSG00000215126	ZNG1F	40.3478	1.27257	0.482926	-2.63513	0.00841056	0.0237542
ENSG00000226806	LCT-AS1	9.58721	1.27207	0.9648	-1.31848	0.187342	0.324519
ENSG00000160226	CFAP410	196.152	1.27202	0.231953	-5.48393	4.16e-08	2.81e-07
ENSG00000289532	NA	8.74682	1.27123	1.03299	-1.23063	0.218461	0.364244
ENSG00000298887	NA	6.19929	1.27064	1.20584	-1.05374	0.292001	0.452209
ENSG00000287576	NA	12.1208	1.27046	0.877446	-1.4479	0.147644	0.268958
ENSG00000127663	KDM4B	1172.29	1.26858	0.119235	-10.6394	1.95e-26	5.07e-25
ENSG00000115255	REEP6	76.384	1.26831	0.348543	-3.63888	0.000273825	0.00106762
ENSG00000224888	NA	9.01066	1.26743	1.05339	-1.20319	0.228904	0.376992
ENSG00000286214	NA	35.4256	1.26734	0.504297	-2.51308	0.0119681	0.0324097
ENSG00000248712	DRC12	9.79129	1.26733	0.992996	-1.27627	0.20186	0.342551
ENSG00000186523	FAM86B1	6.18531	1.26697	1.1967	-1.05872	0.289726	0.449695
ENSG00000264635	NA	4.98098	1.26682	1.4314	-0.885023	0.376144	0.541384
ENSG00000197363	ZNF517	142.251	1.26654	0.280425	-4.51649	6.29e-06	3.23e-05
ENSG00000254842	NA	28.1539	1.26615	0.574283	-2.20475	0.0274715	0.0667376
ENSG00000067445	TRO	282.323	1.26575	0.193617	-6.53741	6.26e-11	5.66e-10
ENSG00000271874	NA	4.05446	1.26563	1.56735	-0.807491	0.419383	0.584286
ENSG00000196182	STK40	1336.1	1.26548	0.112808	-11.2181	3.32e-29	9.63e-28
ENSG00000111728	ST8SIA1	33.5059	1.2652	0.586482	-2.15727	0.0309844	0.0740802
ENSG00000186654	PRR5	19.3226	1.26513	0.695163	-1.8199	0.0687741	0.145438
ENSG00000298338	NA	30.1288	1.26303	0.559294	-2.25825	0.0239299	0.0591377
ENSG00000138769	CDKL2	32.2704	1.26195	0.541851	-2.32895	0.0198615	0.0503577
ENSG00000117016	RIMS3	5.1129	1.26191	1.30286	-0.96857	0.33276	0.495827
ENSG00000294208	NA	56.8433	1.26163	0.40781	-3.09366	0.00197704	0.00646582
ENSG00000153029	MR1	429.932	1.26157	0.170174	-7.41343	1.23e-13	1.43e-12
ENSG00000233184	DPH5-DT	64.881	1.26154	0.427794	-2.94894	0.00318862	0.00996855
ENSG00000116885	OSCP1	132.295	1.25926	0.271249	-4.64246	3.44e-06	1.83e-05
ENSG00000213062	NA	22.3806	1.25898	0.638443	-1.97196	0.0486144	0.108905
ENSG00000099785	MARCHF2	304.028	1.2589	0.182733	-6.88929	5.61e-12	5.61e-11
ENSG00000139926	FRMD6	9204.64	1.25877	0.076326	-16.4921	4.18e-61	3.54e-59
ENSG00000134245	WNT2B	10.7077	1.25868	0.944391	-1.3328	0.182599	0.317834
ENSG00000026103	FAS	1012.27	1.25385	0.116982	-10.7183	8.35e-27	2.2e-25
ENSG00000160703	NLRX1	797.483	1.25277	0.124786	-10.0394	1.02e-23	2.29e-22
ENSG00000286918	NA	5.44889	1.25211	1.33126	-0.940547	0.346937	0.511668
ENSG00000269313	MAGIX	26.5871	1.25152	0.579219	-2.1607	0.0307183	0.0735301
ENSG00000149634	SPATA25	5.76546	1.25131	1.26731	-0.987381	0.323456	0.486362
ENSG00000105672	ETV2	15.9074	1.2502	0.77577	-1.61157	0.107057	0.208303
ENSG00000174939	ASPHD1	295.614	1.25011	0.187235	-6.67665	2.44e-11	2.31e-10
ENSG00000225828	FAM229A	34.3856	1.24809	0.515635	-2.4205	0.0154993	0.0405776
ENSG00000150281	CTF1	75.1257	1.24769	0.363296	-3.43436	0.000593947	0.00216862
ENSG00000172663	TMEM134	341.451	1.24629	0.176593	-7.05743	1.7e-12	1.77e-11
ENSG00000295295	NA	6.79595	1.24569	1.1346	-1.09792	0.272242	0.429255
ENSG00000099840	IZUMO4	7.84041	1.24563	1.06197	-1.17294	0.240819	0.391478
ENSG00000247796	MOCS2-DT	74.054	1.2455	0.354221	-3.51616	0.00043784	0.00163781
ENSG00000101199	ARFGAP1	2655.49	1.24477	0.0886899	-14.035	9.52e-45	4.85e-43
ENSG00000265972	TXNIP	851.916	1.24476	0.1261	-9.87116	5.55e-23	1.18e-21
ENSG00000154767	XPC	647.481	1.24438	0.135927	-9.15483	5.44e-20	9.78e-19
ENSG00000248932	COPB2-DT	35.5379	1.24379	0.527852	-2.35632	0.0184568	0.0472514
ENSG00000100100	PIK3IP1	123.152	1.24341	0.330802	-3.75877	0.000170751	0.000691698
ENSG00000157514	TSC22D3	513.736	1.24215	0.159002	-7.81217	5.62e-15	7.25e-14
ENSG00000227214	HCG15	20.4639	1.24079	0.660317	-1.87908	0.0602334	0.130455
ENSG00000196975	ANXA4	1300.03	1.24042	0.110122	-11.2641	1.97e-29	5.77e-28
ENSG00000184117	NIPSNAP1	1785.26	1.23933	0.101049	-12.2647	1.4e-34	4.93e-33
ENSG00000116337	AMPD2	2397.26	1.23869	0.0956949	-12.9441	2.54e-38	1.01e-36
ENSG00000083750	RRAGB	273.082	1.238	0.213606	-5.79572	6.8e-09	5.04e-08
ENSG00000279289	NA	4.79701	1.23718	1.47285	-0.839994	0.400912	0.566535
ENSG00000119922	IFIT2	171.987	1.23648	0.256909	-4.81291	1.49e-06	8.36e-06
ENSG00000175874	CREG2	9.65538	1.23572	0.966774	-1.27819	0.201183	0.341857
ENSG00000259802	MARCHF6-DT	21.755	1.23546	0.661545	-1.86753	0.0618276	0.133306
ENSG00000261079	NA	7.56645	1.2338	1.08287	-1.13937	0.254547	0.40758
ENSG00000185527	PDE6G	23.4133	1.23375	0.623827	-1.97771	0.0479614	0.107574
ENSG00000205790	DPP9-AS1	5.84147	1.23263	1.23079	-1.0015	0.316586	0.479301
ENSG00000250091	DNAH10OS	49.8239	1.23232	0.475359	-2.59239	0.0095311	0.0264982
ENSG00000072310	SREBF1	2011.4	1.23171	0.104846	-11.7478	7.25e-32	2.32e-30
ENSG00000182612	TSPAN10	510.314	1.23147	0.149017	-8.26392	1.41e-16	2.03e-15
ENSG00000304504	LOC105379035	3.43598	1.23104	1.57029	-0.783953	0.433067	0.597055
ENSG00000289866	NA	3.43598	1.23104	1.57029	-0.783953	0.433067	0.597055
ENSG00000132915	PDE6A	8.45104	1.2304	1.05826	-1.16267	0.244965	0.396362
ENSG00000236081	ELFN1-AS1	19.3394	1.23004	0.70641	-1.74126	0.0816384	0.16794
ENSG00000088538	DOCK3	31.761	1.22989	0.546531	-2.25036	0.0244263	0.0601822
ENSG00000112297	CRYBG1	63.1667	1.2297	0.378531	-3.2486	0.00115975	0.00398715
ENSG00000099330	OCEL1	103.384	1.229	0.304395	-4.03752	5.4e-05	0.000237208
ENSG00000246640	PICART1	37.4325	1.2277	0.519106	-2.36503	0.0180284	0.0462927
ENSG00000310136	NA	4.46647	1.22768	1.43178	-0.857453	0.391195	0.557293
ENSG00000293514	CUTALP	131.288	1.22753	0.270943	-4.53059	5.88e-06	3.03e-05
ENSG00000108821	COL1A1	7158.9	1.22735	0.237791	-5.16145	2.45e-07	1.51e-06
ENSG00000198796	ALPK2	54.108	1.22613	0.411565	-2.97918	0.00289018	0.0091212
ENSG00000240429	NA	7.88847	1.22611	1.07307	-1.14262	0.253197	0.405937
ENSG00000177875	CCDC184	20.196	1.22559	0.665321	-1.8421	0.0654606	0.139498
ENSG00000163516	ANKZF1	422.905	1.22452	0.165156	-7.41432	1.22e-13	1.42e-12
ENSG00000279583	NA	8.19106	1.22304	1.06116	-1.15255	0.249096	0.40142
ENSG00000012822	CALCOCO1	1056.87	1.22226	0.115432	-10.5886	3.37e-26	8.57e-25
ENSG00000161328	LRRC56	20.9665	1.22212	0.65586	-1.86339	0.0624072	0.134378
ENSG00000204618	RNF39	45.3411	1.22193	0.451856	-2.70425	0.0068458	0.0198041
ENSG00000004838	ZMYND10	37.85	1.22084	0.492938	-2.47665	0.0132622	0.0354665
ENSG00000182541	LIMK2	1391.13	1.22008	0.270402	-4.51211	6.42e-06	3.29e-05
ENSG00000198046	ZNF667	133.606	1.2192	0.275771	-4.42106	9.82e-06	4.87e-05
ENSG00000137720	CFAP68	157.934	1.21914	0.247046	-4.93487	8.02e-07	4.65e-06
ENSG00000099260	PALMD	321.107	1.21742	0.179001	-6.80121	1.04e-11	1.01e-10
ENSG00000185477	GPRIN3	6.81606	1.217	1.14756	-1.06051	0.288913	0.448867
ENSG00000050405	LIMA1	2757.48	1.21659	0.101638	-11.9697	5.12e-33	1.71e-31
ENSG00000291147	NA	12.053	1.21555	0.858533	-1.41585	0.15682	0.282331
ENSG00000304654	NA	11.0225	1.21517	0.889003	-1.36689	0.171661	0.303104
ENSG00000137171	KLC4	332.432	1.21461	0.185227	-6.55742	5.47e-11	5e-10
ENSG00000115008	IL1A	25.3638	1.21436	0.632885	-1.91877	0.0550136	0.120737
ENSG00000072163	LIMS2	187.286	1.21397	0.243521	-4.98506	6.19e-07	3.64e-06
ENSG00000174938	SEZ6L2	964.781	1.21391	0.120009	-10.1152	4.73e-24	1.08e-22
ENSG00000235532	LINC00402	5.23697	1.21332	1.31366	-0.923618	0.355685	0.520619
ENSG00000172939	OXSR1	2687.54	1.21235	0.0916694	-13.2252	6.27e-40	2.69e-38
ENSG00000267348	NA	6.26746	1.21189	1.24504	-0.973382	0.330364	0.49379
ENSG00000163171	CDC42EP3	7166.13	1.21182	0.0774631	-15.6438	3.66e-55	2.62e-53
ENSG00000229589	ACVR2B-AS1	9.80741	1.21065	1.03372	-1.17116	0.241533	0.392247
ENSG00000295208	NA	11.793	1.20956	0.873614	-1.38455	0.16619	0.295548
ENSG00000303946	NA	9.05156	1.20754	1.03769	-1.16369	0.244551	0.395927
ENSG00000232742	NA	5.88954	1.20741	1.21345	-0.995018	0.319728	0.482427
ENSG00000285926	NA	5.88954	1.20741	1.21345	-0.995018	0.319728	0.482427
ENSG00000302646	NA	6.55607	1.20664	1.16914	-1.03207	0.302038	0.463339
ENSG00000265688	MILIP	30.4362	1.20556	0.542803	-2.22099	0.026352	0.0642859
ENSG00000298771	NA	20.5249	1.20497	0.683471	-1.76302	0.0778978	0.161426
ENSG00000225972	MTND1P23	5.20902	1.20459	1.29969	-0.926826	0.354017	0.51881
ENSG00000167992	VWCE	11.2305	1.20438	0.948273	-1.27008	0.204056	0.345313
ENSG00000147144	CCDC120	77.5129	1.20409	0.343466	-3.50569	0.000455426	0.00169775
ENSG00000198561	CTNND1	211.936	1.20374	0.254188	-4.73563	2.18e-06	1.19e-05
ENSG00000120156	TEK	10.7206	1.20233	0.918239	-1.30939	0.190404	0.328078
ENSG00000179085	DPM3	335.776	1.19948	0.179264	-6.69113	2.21e-11	2.1e-10
ENSG00000214274	ANG	33.1225	1.19938	0.527527	-2.27358	0.0229911	0.0572426
ENSG00000293491	TMEM198B	95.7322	1.19933	0.31031	-3.86494	0.000111114	0.000465727
ENSG00000142765	SYTL1	6.66004	1.1993	1.19956	-0.999781	0.317416	0.480084
ENSG00000170092	SPDYE5	4.54248	1.19919	1.51503	-0.791527	0.428636	0.592974
ENSG00000271862	NA	12.5216	1.19913	0.854774	-1.40286	0.160658	0.287433
ENSG00000102871	TRADD	400.816	1.19872	0.165561	-7.24034	4.48e-13	4.96e-12
ENSG00000276855	NA	55.9783	1.19752	0.402674	-2.97392	0.00294025	0.00925595
ENSG00000169891	REPS2	73.0866	1.19728	0.354841	-3.37414	0.000740462	0.00265126
ENSG00000197934	CYYR1-AS1	11.3452	1.1968	0.908715	-1.31702	0.18783	0.32486
ENSG00000112981	NME5	23.707	1.19672	0.635317	-1.88366	0.0596115	0.129262
ENSG00000152822	GRM1	6.51415	1.19581	1.1694	-1.02258	0.306508	0.468478
ENSG00000167780	SOAT2	6.21156	1.19557	1.2603	-0.948636	0.342806	0.50732
ENSG00000104946	TBC1D17	1103.83	1.19513	0.112533	-10.6203	2.4e-26	6.17e-25
ENSG00000257594	GALNT4	4.16456	1.19491	1.43348	-0.833568	0.404524	0.569863
ENSG00000267519	NA	94.5736	1.19326	0.32029	-3.72556	0.000194882	0.00078034
ENSG00000164442	CITED2	8001.94	1.19109	0.0824474	-14.4467	2.63e-47	1.49e-45
ENSG00000126391	FRMD8	934.778	1.19065	0.118862	-10.0171	1.28e-23	2.85e-22
ENSG00000181513	ACBD4	144.864	1.18958	0.263551	-4.51364	6.37e-06	3.27e-05
ENSG00000232653	GOLGA8N	24.5395	1.18934	0.618815	-1.92197	0.0546096	0.12003
ENSG00000225407	NA	4.15058	1.18925	1.43052	-0.831341	0.405781	0.571041
ENSG00000264513	NA	4.15058	1.18925	1.43052	-0.831341	0.405781	0.571041
ENSG00000160445	ZER1	1133.01	1.18847	0.11445	-10.3841	2.93e-25	7.12e-24
ENSG00000272768	NA	9.97024	1.18822	0.941382	-1.26221	0.206872	0.349059
ENSG00000228262	LINC01317	12.4378	1.18751	0.838362	-1.41646	0.156641	0.282103
ENSG00000061656	SPAG4	55.3581	1.18641	0.40455	-2.93266	0.00336069	0.0104425
ENSG00000178919	FOXE1	113.475	1.18474	0.298302	-3.9716	7.14e-05	0.000307772
ENSG00000106772	PRUNE2	945.425	1.18448	0.122521	-9.6675	4.14e-22	8.41e-21
ENSG00000140022	STON2	10.7407	1.18393	0.901963	-1.31262	0.189313	0.326661
ENSG00000228126	FALEC	9.72423	1.18384	0.97602	-1.21293	0.225157	0.372651
ENSG00000121671	CRY2	276.887	1.18245	0.205587	-5.75158	8.84e-09	6.46e-08
ENSG00000105708	ZNF14	46.3632	1.1813	0.440915	-2.6792	0.00737987	0.0211615
ENSG00000260879	NA	6.16963	1.18067	1.31823	-0.89565	0.37044	0.535346
ENSG00000281903	ASMER1	79.0448	1.18066	0.345617	-3.41609	0.000635261	0.00230751
ENSG00000291043	NA	52.5932	1.18053	0.443356	-2.66271	0.00775134	0.0221101
ENSG00000013392	RWDD2A	193.125	1.18052	0.22555	-5.23395	1.66e-07	1.05e-06
ENSG00000244509	APOBEC3C	228.798	1.18051	0.208574	-5.65992	1.51e-08	1.08e-07
ENSG00000215014	NA	11.8612	1.18049	0.867579	-1.36068	0.173616	0.305655
ENSG00000280327	NA	7.5927	1.17935	1.07934	-1.09266	0.274544	0.43205
ENSG00000157379	DHRS1	424.07	1.17911	0.159008	-7.41541	1.21e-13	1.41e-12
ENSG00000065361	ERBB3	9.69628	1.17863	0.968422	-1.21706	0.22358	0.37092
ENSG00000226137	BAIAP2-DT	352.759	1.1782	0.173768	-6.78033	1.2e-11	1.16e-10
ENSG00000266835	GAPLINC	11.99	1.17607	0.906378	-1.29755	0.194441	0.333255
ENSG00000261652	PIERCE2	49.3505	1.17605	0.458763	-2.56352	0.0103617	0.028509
ENSG00000160685	ZBTB7B	1044.41	1.17589	0.117799	-9.98217	1.82e-23	3.99e-22
ENSG00000167363	FN3K	66.1173	1.1758	0.37934	-3.09959	0.00193786	0.00634659
ENSG00000185507	IRF7	45.4288	1.17403	0.444239	-2.64279	0.00822271	0.0232877
ENSG00000250320	EDIL3-DT	165.492	1.17255	0.249196	-4.70532	2.53e-06	1.37e-05
ENSG00000170667	RASA4B	44.6094	1.17132	0.498426	-2.35004	0.0187715	0.0479367
ENSG00000286535	LOC124902026	13.2424	1.17132	0.814567	-1.43797	0.150444	0.273112
ENSG00000172748	ZNF596	20.1514	1.171	0.744872	-1.57208	0.115931	0.2221
ENSG00000103042	SLC38A7	1273.56	1.17083	0.110192	-10.6254	2.27e-26	5.85e-25
ENSG00000172893	DHCR7	2114.64	1.17052	0.11671	-10.0293	1.13e-23	2.53e-22
ENSG00000289112	NA	4.89313	1.17031	1.33746	-0.875023	0.381561	0.547534
ENSG00000290047	NA	6.54823	1.16975	1.15523	-1.01257	0.311264	0.473308
ENSG00000237149	ZNF503-AS2	88.4195	1.16969	0.32468	-3.60258	0.000315079	0.00121081
ENSG00000141376	BCAS3	255.765	1.16951	0.203088	-5.75862	8.48e-09	6.2e-08
ENSG00000213983	AP1G2	91.0778	1.1681	0.316462	-3.69112	0.000223273	0.000884256
ENSG00000271780	NA	32.6465	1.16666	0.529642	-2.20274	0.0276132	0.0670219
ENSG00000263345	NA	5.88169	1.16651	1.22154	-0.954949	0.339603	0.503632
ENSG00000179476	DORIP1	66.7548	1.1665	0.381344	-3.05891	0.00222141	0.00719289
ENSG00000146083	RNF44	765.884	1.16608	0.140617	-8.29262	1.11e-16	1.62e-15
ENSG00000076344	RGS11	19.3707	1.16522	0.692197	-1.68336	0.0923051	0.185056
ENSG00000182902	SLC25A18	25.0818	1.16502	0.597015	-1.95141	0.051008	0.11341
ENSG00000168542	COL3A1	7.17284	1.16424	1.16155	-1.00232	0.316191	0.47897
ENSG00000161202	DVL3	3110.94	1.16349	0.10543	-11.0357	2.57e-28	7.24e-27
ENSG00000198858	R3HDM4	915.923	1.1634	0.120514	-9.65362	4.75e-22	9.58e-21
ENSG00000291073	NA	9.74434	1.16315	0.950975	-1.22312	0.221285	0.368087
ENSG00000188916	INSYN2A	25.4883	1.16295	0.59499	-1.95457	0.0506339	0.112795
ENSG00000172890	NADSYN1	876.612	1.16294	0.126972	-9.15899	5.24e-20	9.44e-19
ENSG00000304354	LOC102723458	7.01615	1.16292	1.18972	-0.977474	0.328335	0.491523
ENSG00000137691	CFAP300	92.9197	1.16257	0.314852	-3.69243	0.000222118	0.000880109
ENSG00000173992	CCS	377.522	1.16223	0.171464	-6.77828	1.22e-11	1.18e-10
ENSG00000248641	NA	5.86772	1.1622	1.23443	-0.941484	0.346457	0.511193
ENSG00000135722	FBXL8	88.6846	1.16121	0.323375	-3.59089	0.000329546	0.00126224
ENSG00000139211	AMIGO2	7539.62	1.15917	0.0974876	-11.8905	1.33e-32	4.33e-31
ENSG00000277215	SPANXA2-OT1	7.29079	1.15897	1.09184	-1.06148	0.28847	0.448343
ENSG00000087076	HSD17B14	262.74	1.15828	0.1984	-5.83811	5.28e-09	3.96e-08
ENSG00000156587	UBE2L6	638.435	1.15711	0.145101	-7.9745	1.53e-15	2.05e-14
ENSG00000117245	KIF17	33.2811	1.15612	0.526449	-2.19606	0.0280874	0.0680614
ENSG00000300286	NA	4.85121	1.15563	1.33051	-0.868562	0.385087	0.551119
ENSG00000187796	CARD9	32.8466	1.15538	0.540605	-2.13719	0.0325825	0.0772745
ENSG00000167196	FBXO22	690.224	1.1548	0.131995	-8.74879	2.16e-18	3.48e-17
ENSG00000116017	ARID3A	126.977	1.1537	0.280901	-4.10715	4.01e-05	0.000180066
ENSG00000132563	REEP2	285.168	1.15365	0.194489	-5.93168	3e-09	2.32e-08
ENSG00000237529	NA	3.83469	1.15165	1.61484	-0.713164	0.475744	0.636341
ENSG00000103485	QPRT	95.452	1.14979	0.312743	-3.67646	0.00023649	0.000932977
ENSG00000187650	VMAC	41.6953	1.14971	0.468778	-2.45256	0.0141842	0.0375566
ENSG00000173531	MST1	26.5304	1.14925	0.6459	-1.7793	0.0751904	0.156912
ENSG00000090932	DLL3	16.2568	1.14831	0.753554	-1.52386	0.127544	0.23987
ENSG00000078804	TP53INP2	1140.4	1.14789	0.111297	-10.3138	6.11e-25	1.45e-23
ENSG00000280239	NA	13.1926	1.14764	0.824094	-1.39261	0.163739	0.291953
ENSG00000139182	CLSTN3	488.62	1.14752	0.172208	-6.66354	2.67e-11	2.52e-10
ENSG00000236810	ELOA-AS1	8.01936	1.14749	1.04753	-1.09543	0.273327	0.430426
ENSG00000129566	TEP1	757.485	1.14674	0.127311	-9.0074	2.11e-19	3.61e-18
ENSG00000225156	NA	80.2471	1.1453	0.342495	-3.34398	0.000825856	0.00293256
ENSG00000243927	MRPS6	3.82072	1.14493	1.60777	-0.712126	0.476387	0.636992
ENSG00000270049	ATP6V0D1-DT	15.2123	1.1428	0.786892	-1.4523	0.146418	0.267411
ENSG00000158856	DMTN	203.791	1.14273	0.236673	-4.82832	1.38e-06	7.77e-06
ENSG00000181541	MAB21L2	486.789	1.14121	0.163266	-6.9899	2.75e-12	2.83e-11
ENSG00000289164	NA	3.53211	1.14063	1.68073	-0.678652	0.497359	0.655682
ENSG00000150667	FSIP1	23.151	1.14053	0.621252	-1.83586	0.0663787	0.141049
ENSG00000109065	NAT9	570.826	1.14047	0.147421	-7.73613	1.02e-14	1.3e-13
ENSG00000186615	KTN1-AS1	34.3106	1.14029	0.50823	-2.24365	0.0248551	0.0611095
ENSG00000146038	DCDC2	37.8535	1.14022	0.502689	-2.26825	0.0233141	0.0579067
ENSG00000184378	ACTRT3	60.234	1.14021	0.3945	-2.89028	0.00384905	0.011807
ENSG00000272853	NA	8.61602	1.13995	1.05859	-1.07685	0.281546	0.440436
ENSG00000227885	LOC124901333	5.57978	1.13945	1.24734	-0.913507	0.360976	0.52643
ENSG00000154065	ANKRD29	5.57978	1.13945	1.24734	-0.913507	0.360976	0.52643
ENSG00000134574	DDB2	190.987	1.13848	0.226596	-5.02428	5.05e-07	3e-06
ENSG00000101986	ABCD1	554.982	1.13845	0.141547	-8.04289	8.77e-16	1.2e-14
ENSG00000115548	KDM3A	981.17	1.1372	0.11559	-9.83819	7.71e-23	1.62e-21
ENSG00000246859	STARD4-AS1	222.379	1.13717	0.217881	-5.21921	1.8e-07	1.13e-06
ENSG00000105048	TNNT1	79.935	1.13609	0.341218	-3.32952	0.000869956	0.00307783
ENSG00000050327	ARHGEF5	139.004	1.13603	0.277122	-4.09937	4.14e-05	0.000185711
ENSG00000146904	EPHA1	13.0226	1.13575	0.826069	-1.37488	0.169168	0.299668
ENSG00000236782	ZNF593OS	5.29117	1.13538	1.42347	-0.797615	0.425094	0.590024
ENSG00000187601	MAGEH1	131.196	1.1351	0.273406	-4.1517	3.3e-05	0.000150933
ENSG00000240476	LINC00973	593.283	1.13506	0.145105	-7.82236	5.18e-15	6.71e-14
ENSG00000164096	ARLN	1368.22	1.13476	0.125214	-9.06251	1.27e-19	2.22e-18
ENSG00000213030	CGB8	14.9857	1.13438	0.792796	-1.43086	0.152471	0.275933
ENSG00000122176	FMOD	12.37	1.13395	0.856826	-1.32343	0.185693	0.322291
ENSG00000087253	LPCAT2	5764.4	1.13368	0.0884781	-12.8131	1.39e-37	5.35e-36
ENSG00000113578	FGF1	259.691	1.13354	0.205716	-5.51021	3.58e-08	2.44e-07
ENSG00000236255	NA	9.49049	1.13334	0.989677	-1.14517	0.252141	0.404839
ENSG00000212864	RNF208	121.729	1.13282	0.276483	-4.09724	4.18e-05	0.000187173
ENSG00000197852	INKA2	48.0571	1.13248	0.466425	-2.428	0.0151825	0.0398188
ENSG00000261512	NA	87.9053	1.13236	0.332039	-3.41032	0.000648857	0.00235323
ENSG00000142552	RCN3	11.1037	1.13163	0.907223	-1.24736	0.212266	0.356062
ENSG00000165861	ZFYVE1	704.116	1.13094	0.129742	-8.7168	2.86e-18	4.57e-17
ENSG00000210195	NA	10.1765	1.13063	0.969212	-1.16654	0.243395	0.394486
ENSG00000126106	TMEM53	126.92	1.1295	0.30022	-3.76225	0.00016839	0.000682642
ENSG00000182359	KBTBD3	47.97	1.12941	0.431168	-2.61942	0.00880806	0.024701
ENSG00000133048	CHI3L1	52.7126	1.12894	0.420976	-2.68173	0.0073243	0.0210169
ENSG00000300213	NA	6.30836	1.1274	1.18478	-0.951572	0.341314	0.50548
ENSG00000298149	NA	3.77879	1.12691	1.63738	-0.688236	0.491304	0.650698
ENSG00000259826	NA	8.18537	1.12664	1.06965	-1.05328	0.292211	0.452433
ENSG00000165533	TTC8	532.756	1.12612	0.149233	-7.54605	4.49e-14	5.38e-13
ENSG00000286024	LOC105372432	7.06489	1.12584	1.15566	-0.974197	0.329959	0.493411
ENSG00000158023	CFAP251	53.0639	1.1244	0.41795	-2.69026	0.00713963	0.0205666
ENSG00000210135	NA	244.391	1.1244	0.20401	-5.51146	3.56e-08	2.42e-07
ENSG00000182919	C11orf54	253.477	1.12413	0.197121	-5.70272	1.18e-08	8.48e-08
ENSG00000161642	ZNF385A	494.718	1.12336	0.158745	-7.07651	1.48e-12	1.55e-11
ENSG00000085831	TTC39A	24.7183	1.12299	0.610677	-1.83893	0.0659248	0.140268
ENSG00000029534	ANK1	37.7997	1.12297	0.487195	-2.30498	0.0211679	0.0532395
ENSG00000172830	SSH3	247.591	1.12286	0.212705	-5.27897	1.3e-07	8.32e-07
ENSG00000100116	GCAT	318.741	1.12219	0.17891	-6.27236	3.56e-10	3.01e-09
ENSG00000227295	NA	12.2722	1.12045	0.845847	-1.32465	0.185289	0.321692
ENSG00000260552	COSMOC	7.38691	1.11995	1.08152	-1.03553	0.300421	0.461596
ENSG00000137843	PAK6	10.2525	1.11904	0.993913	-1.12589	0.260212	0.414472
ENSG00000238227	TMEM250	2760.57	1.11882	0.0873124	-12.8139	1.37e-37	5.31e-36
ENSG00000278952	NA	9.75661	1.11878	0.960737	-1.16451	0.244219	0.395546
ENSG00000179715	PCED1B	134.199	1.11823	0.268538	-4.16412	3.13e-05	0.000143223
ENSG00000144048	DUSP11	513.519	1.1172	0.147471	-7.57571	3.57e-14	4.33e-13
ENSG00000071282	LMCD1	188.525	1.11643	0.244587	-4.56456	5.01e-06	2.6e-05
ENSG00000184903	IMMP2L	99.3081	1.11635	0.320219	-3.4862	0.000489939	0.00181686
ENSG00000259230	LINC02323	7.64757	1.11595	1.13556	-0.982727	0.325742	0.488583
ENSG00000110011	DNAJC4	308.804	1.11522	0.186111	-5.99224	2.07e-09	1.63e-08
ENSG00000229981	LINC01435	24.6064	1.11521	0.608171	-1.83371	0.0666967	0.141614
ENSG00000105974	CAV1	20089.6	1.114	0.0691825	-16.1023	2.46e-58	1.95e-56
ENSG00000295209	NA	5.62785	1.114	1.22956	-0.906014	0.364928	0.529414
ENSG00000221164	SNORA11F	5.97782	1.11391	1.27568	-0.873186	0.382562	0.548636
ENSG00000185100	ADSS1	20.0098	1.11377	0.662446	-1.6813	0.0927049	0.185535
ENSG00000145246	ATP10D	2314.97	1.11361	0.0896294	-12.4246	1.92e-35	6.98e-34
ENSG00000007255	TRAPPC6A	66.1686	1.11349	0.398708	-2.79274	0.00522637	0.0155523
ENSG00000068079	IFI35	356.343	1.11264	0.17512	-6.35359	2.1e-10	1.82e-09
ENSG00000169193	CCDC126	77.65	1.11215	0.353774	-3.14368	0.00166839	0.00553796
ENSG00000272235	NA	28.2292	1.11155	0.560932	-1.98162	0.0475221	0.106751
ENSG00000184857	TMEM186	141.252	1.11093	0.261434	-4.24938	2.14e-05	0.000100861
ENSG00000170909	OSCAR	9.62854	1.11035	0.994309	-1.11671	0.264119	0.419163
ENSG00000285230	RALY-AS1	45.8468	1.10895	0.453901	-2.44315	0.0145596	0.038401
ENSG00000304975	NA	12.6089	1.10862	0.841203	-1.3179	0.187538	0.324666
ENSG00000174576	NPAS4	9.35073	1.10845	1.01919	-1.08759	0.276778	0.434979
ENSG00000188996	HUS1B	4.49339	1.10833	1.51698	-0.730616	0.465014	0.625785
ENSG00000298775	LOC105376177	48.845	1.10758	0.439617	-2.51943	0.0117547	0.0318898
ENSG00000269937	NA	16.189	1.10745	0.734819	-1.50711	0.131783	0.245829
ENSG00000133466	C1QTNF6	492.127	1.10712	0.15206	-7.28079	3.32e-13	3.72e-12
ENSG00000290048	NA	6.7064	1.10686	1.16874	-0.947052	0.343612	0.507898
ENSG00000207561	MIR635	11.6817	1.10609	0.896335	-1.23401	0.217198	0.362581
ENSG00000265962	GACAT2	8.08754	1.10604	1.03231	-1.07141	0.283983	0.443313
ENSG00000204859	ZBTB48	160.835	1.1058	0.262203	-4.21734	2.47e-05	0.000115119
ENSG00000164112	SMIM43	20.3798	1.10485	0.669913	-1.64924	0.0990987	0.195785
ENSG00000129214	SHBG	7.44895	1.10345	1.09276	-1.00979	0.312598	0.474585
ENSG00000157873	TNFRSF14	230.64	1.1026	0.206099	-5.34986	8.8e-08	5.75e-07
ENSG00000295132	NA	4.96131	1.10221	1.32376	-0.832638	0.405049	0.570404
ENSG00000300470	NA	10.2112	1.102	0.930255	-1.18462	0.236167	0.385876
ENSG00000253368	TRNP1	267.398	1.10143	0.200376	-5.49679	3.87e-08	2.62e-07
ENSG00000303847	NA	14.6767	1.10081	0.813787	-1.3527	0.176152	0.308919
ENSG00000249628	LINC00942	6.34245	1.10079	1.1617	-0.947563	0.343352	0.507822
ENSG00000236393	LINC03099	19.4673	1.09835	0.674782	-1.62771	0.103586	0.202832
ENSG00000158555	GDPD5	114.692	1.09711	0.283355	-3.87186	0.000108007	0.000453403
ENSG00000197506	SLC28A3	21.241	1.09689	0.66102	-1.65939	0.0970379	0.1926
ENSG00000121690	DEPDC7	86.9794	1.09661	0.338483	-3.23978	0.0011962	0.00409779
ENSG00000149591	TAGLN	4635.98	1.09621	0.212902	-5.14891	2.62e-07	1.61e-06
ENSG00000153982	GDPD1	15.2485	1.09569	0.759169	-1.44328	0.148941	0.270806
ENSG00000260912	NA	31.747	1.09433	0.570042	-1.91973	0.054892	0.120502
ENSG00000260329	TMEM263-DT	17.4444	1.09432	0.748352	-1.46231	0.143656	0.263193
ENSG00000169093	ASMTL	434.756	1.09358	0.158478	-6.90051	5.18e-12	5.2e-11
ENSG00000131943	C19orf12	681.266	1.09303	0.132645	-8.24029	1.72e-16	2.46e-15
ENSG00000167306	MYO5B	51.1444	1.09226	0.427809	-2.55314	0.0106757	0.0292891
ENSG00000238141	BRWD1-AS1	4.93336	1.09216	1.33547	-0.817807	0.413468	0.578365
ENSG00000270069	NA	148.783	1.09201	0.258284	-4.22793	2.36e-05	0.00011005
ENSG00000171811	CFAP46	21.9277	1.09146	0.647907	-1.6846	0.0920657	0.184709
ENSG00000271918	NA	8.01766	1.09036	1.08657	-1.0035	0.315622	0.478196
ENSG00000170835	CEL	6.30052	1.0896	1.1788	-0.924331	0.355314	0.520121
ENSG00000006757	PNPLA4	100.408	1.08952	0.322506	-3.37829	0.000729388	0.00261678
ENSG00000113108	APBB3	157.594	1.08787	0.254502	-4.27451	1.92e-05	9.08e-05
ENSG00000196152	ZNF79	88.0195	1.08716	0.327108	-3.32354	0.000888824	0.00313907
ENSG00000147912	FBXO10	117.149	1.08713	0.284916	-3.81562	0.00013584	0.000559586
ENSG00000156976	EIF4A2	4924.93	1.08665	0.0973856	-11.1582	6.53e-29	1.88e-27
ENSG00000289378	NA	12.8058	1.08615	0.976607	-1.11217	0.266066	0.421514
ENSG00000033627	ATP6V0A1	1514.19	1.08607	0.106456	-10.202	1.94e-24	4.51e-23
ENSG00000238160	LINC02863	11.4698	1.08597	0.90822	-1.19571	0.231808	0.380661
ENSG00000187792	ZNF70	189.889	1.08535	0.243742	-4.45288	8.47e-06	4.25e-05
ENSG00000298189	NA	5.66193	1.08475	1.23108	-0.881142	0.378241	0.54388
ENSG00000254531	PPP3CA-DT	71.8546	1.08459	0.354309	-3.06114	0.00220499	0.00714967
ENSG00000163110	PDLIM5	7200.08	1.08423	0.0767178	-14.1328	2.39e-45	1.25e-43
ENSG00000180758	GPR157	162.416	1.08392	0.244165	-4.43929	9.03e-06	4.5e-05
ENSG00000167332	OR51E2	37.1738	1.08376	0.500132	-2.16696	0.030238	0.072508
ENSG00000226179	NA	9.9567	1.08334	0.974286	-1.11193	0.266167	0.421602
ENSG00000179406	LINC00174	18.689	1.08311	0.713524	-1.51797	0.129023	0.242008
ENSG00000158104	HPD	6.40448	1.08249	1.15667	-0.935861	0.349345	0.514338
ENSG00000170989	S1PR1	111.399	1.08031	0.301137	-3.58746	0.000333919	0.00127749
ENSG00000155275	TRMT44	142.762	1.08004	0.259085	-4.16868	3.06e-05	0.000140585
ENSG00000165804	ZNF219	442.976	1.07955	0.158832	-6.79681	1.07e-11	1.04e-10
ENSG00000101935	AMMECR1	885.109	1.07851	0.12463	-8.65366	4.99e-18	7.86e-17
ENSG00000139985	ADAM21	5.89464	1.07823	1.3828	-0.779744	0.435541	0.599324
ENSG00000225783	MIAT	96.9438	1.07816	0.32382	-3.32952	0.000869972	0.00307783
ENSG00000302693	NA	5.29798	1.07662	1.31171	-0.820776	0.411774	0.576788
ENSG00000174130	TLR6	75.8022	1.07575	0.355305	-3.02768	0.00246438	0.00791055
ENSG00000173065	FAM222B	715.546	1.0756	0.143638	-7.48824	6.98e-14	8.3e-13
ENSG00000182179	UBA7	430.391	1.07532	0.173383	-6.20196	5.58e-10	4.63e-09
ENSG00000099804	CDC34	1266.44	1.07523	0.106492	-10.0968	5.7e-24	1.29e-22
ENSG00000134242	PTPN22	62.1614	1.07498	0.407233	-2.63971	0.00829758	0.0234875
ENSG00000183054	RGPD6	27.2516	1.0748	1.26149	-0.852009	0.394209	0.560071
ENSG00000153064	BANK1	32.1573	1.07459	0.528557	-2.03306	0.0420462	0.0962126
ENSG00000255517	NA	30.1655	1.07365	0.539412	-1.99041	0.0465453	0.104933
ENSG00000102904	TSNAXIP1	16.0593	1.07346	0.744708	-1.44145	0.149459	0.271536
ENSG00000289268	NA	48.0567	1.07315	0.436883	-2.45637	0.014035	0.03721
ENSG00000109705	NKX3-2	7.72972	1.07309	1.07205	-1.00096	0.316844	0.479514
ENSG00000164967	RPP25L	262.624	1.07264	0.204267	-5.25115	1.51e-07	9.58e-07
ENSG00000293154	NA	4.54145	1.07249	1.41517	-0.757857	0.448537	0.611277
ENSG00000256092	SBNO1-AS1	17.1378	1.07233	0.741432	-1.44629	0.148095	0.269688
ENSG00000277687	NA	12.1145	1.07151	0.855364	-1.2527	0.210316	0.353553
ENSG00000307087	LOC105374721	7.10511	1.07059	1.09548	-0.977277	0.328432	0.491622
ENSG00000254837	LIPT2-AS1	34.9731	1.06959	0.519639	-2.05834	0.0395574	0.0913635
ENSG00000140464	PML	1741.76	1.06928	0.106867	-10.0057	1.44e-23	3.18e-22
ENSG00000117472	TSPAN1	118.728	1.06921	0.289514	-3.69313	0.000221508	0.000877907
ENSG00000259804	LOC100505942	16.628	1.06867	0.728362	-1.46722	0.142316	0.261472
ENSG00000185245	GP1BA	16.0306	1.06849	0.872143	-1.22513	0.220526	0.367049
ENSG00000143416	SELENBP1	6.34858	1.06728	1.17199	-0.910654	0.362478	0.527485
ENSG00000099866	MADCAM1	6.34858	1.06728	1.17199	-0.910654	0.362478	0.527485
ENSG00000150636	CCDC102B	8.44432	1.0671	1.03118	-1.03483	0.300746	0.461922
ENSG00000225377	NRSN2-AS1	97.2453	1.066	0.313592	-3.39933	0.000675504	0.00243956
ENSG00000240771	ARHGEF25	104.787	1.06568	0.299951	-3.55286	0.000381073	0.00144267
ENSG00000259370	NA	9.77273	1.06405	1.00704	-1.05662	0.290686	0.450757
ENSG00000099338	CATSPERG	5.25605	1.06339	1.32786	-0.800828	0.423231	0.588311
ENSG00000173559	NABP1	933.24	1.06305	0.128503	-8.27256	1.31e-16	1.9e-15
ENSG00000167778	SPRYD3	1698.84	1.0619	0.0979451	-10.8418	2.18e-27	5.92e-26
ENSG00000247081	LOC105369147	45.4844	1.06123	0.460626	-2.30388	0.0212294	0.0533696
ENSG00000288670	NA	67.4133	1.06087	0.368244	-2.88089	0.00396558	0.0121302
ENSG00000091592	NLRP1	216.551	1.06076	0.246207	-4.3084	1.64e-05	7.89e-05
ENSG00000224186	PITX1-AS1	6.45255	1.06039	1.16296	-0.911804	0.361872	0.52712
ENSG00000137831	UACA	4111.72	1.05999	0.102386	-10.3529	4.06e-25	9.74e-24
ENSG00000086544	ITPKC	381.191	1.05947	0.169286	-6.25844	3.89e-10	3.28e-09
ENSG00000166359	WDR88	5.70999	1.05921	1.24702	-0.849389	0.395665	0.561381
ENSG00000272168	LOC105374971	35.7698	1.05918	0.520128	-2.03638	0.0417121	0.0956091
ENSG00000232453	LINC02777	10.3414	1.05832	0.914881	-1.15678	0.247362	0.399408
ENSG00000239382	ALKBH6	16.094	1.05657	0.76867	-1.37455	0.169272	0.299787
ENSG00000290535	NA	54.8822	1.05643	0.402685	-2.62346	0.00870429	0.0244521
ENSG00000120885	CLU	500.321	1.05615	0.148579	-7.10833	1.17e-12	1.24e-11
ENSG00000290578	NA	14.0123	1.05589	0.8151	-1.29542	0.195177	0.334165
ENSG00000289228	HECTD2-AS1	9.38083	1.05516	0.999767	-1.05541	0.291238	0.451355
ENSG00000125170	DOK4	542.495	1.05497	0.152514	-6.91721	4.61e-12	4.65e-11
ENSG00000112249	ASCC3	2572.81	1.05438	0.0870274	-12.1155	8.75e-34	3.01e-32
ENSG00000198682	PAPSS2	5450.18	1.05412	0.0879974	-11.979	4.58e-33	1.53e-31
ENSG00000268895	A1BG-AS1	59.6904	1.0539	0.394442	-2.67188	0.00754281	0.021581
ENSG00000105516	DBP	96.8088	1.05385	0.309476	-3.40528	0.000660962	0.00239128
ENSG00000057657	PRDM1	42.871	1.05385	0.460799	-2.28701	0.0221954	0.0554732
ENSG00000144810	COL8A1	11016.1	1.05334	0.075538	-13.9445	3.4e-44	1.72e-42
ENSG00000267871	ZNF460-AS1	6.4246	1.05286	1.16312	-0.905207	0.365355	0.52997
ENSG00000183248	PRR36	25.7124	1.05263	0.605894	-1.73732	0.082331	0.169195
ENSG00000262655	SPON1	18.1199	1.05232	0.737723	-1.42644	0.15374	0.277859
ENSG00000171877	FRMD5	666.272	1.05194	0.138042	-7.62038	2.53e-14	3.1e-13
ENSG00000105246	EBI3	10.7061	1.05191	0.916036	-1.14833	0.250832	0.403215
ENSG00000136888	ATP6V1G1	1859.97	1.05168	0.102005	-10.3101	6.34e-25	1.5e-23
ENSG00000135823	STX6	1372.53	1.05019	0.105659	-9.93944	2.8e-23	6.07e-22
ENSG00000121413	ZSCAN18	147.446	1.04986	0.255426	-4.11024	3.95e-05	0.000177915
ENSG00000251396	NA	4.95347	1.04958	1.40754	-0.745683	0.455859	0.618363
ENSG00000260236	PTPN23-DT	15.4275	1.04927	0.772983	-1.35743	0.174646	0.306971
ENSG00000198835	GJC2	31.7597	1.04705	0.529062	-1.97907	0.0478077	0.107289
ENSG00000167065	DUSP18	127.016	1.04674	0.270532	-3.86921	0.00010919	0.000458015
ENSG00000198590	APRG1	5.92873	1.04615	1.31483	-0.795656	0.426232	0.590799
ENSG00000087589	CASS4	36.032	1.04585	0.525486	-1.99025	0.0465635	0.104959
ENSG00000288044	NA	16.8001	1.0457	0.736502	-1.41982	0.15566	0.280832
ENSG00000198324	PHETA1	254.991	1.04525	0.202034	-5.17366	2.3e-07	1.42e-06
ENSG00000183111	ARHGEF37	58.2821	1.04491	0.416964	-2.50599	0.012211	0.0329906
ENSG00000138639	ARHGAP24	260.047	1.04477	0.193814	-5.3906	7.02e-08	4.62e-07
ENSG00000260781	ARHGAP23P1	19.9891	1.04474	0.668237	-1.56342	0.117953	0.225234
ENSG00000130304	SLC27A1	545.834	1.04455	0.149618	-6.98143	2.92e-12	3e-11
ENSG00000287260	LOC101928868	15.1109	1.04365	0.771896	-1.35206	0.176357	0.309047
ENSG00000206561	COLQ	7.8538	1.04318	1.04356	-0.999637	0.317486	0.480084
ENSG00000100151	PICK1	552.745	1.04308	0.152549	-6.83767	8.05e-12	7.97e-11
ENSG00000177076	ACER2	43.9764	1.04238	0.450036	-2.31621	0.020547	0.05187
ENSG00000008300	CELSR3	82.8675	1.04168	0.330459	-3.15222	0.00162034	0.0053977
ENSG00000070882	OSBPL3	1414.2	1.0413	0.102647	-10.1444	3.51e-24	8.06e-23
ENSG00000261553	NA	7.97174	1.04038	1.06952	-0.972756	0.330675	0.493983
ENSG00000180914	OXTR	1948.11	1.04038	0.0988307	-10.5269	6.5e-26	1.62e-24
ENSG00000168679	SLC16A4	390.055	1.04023	0.179189	-5.80519	6.43e-09	4.77e-08
ENSG00000107021	TBC1D13	816.606	1.03965	0.122088	-8.51555	1.66e-17	2.53e-16
ENSG00000273230	NA	48.264	1.0387	0.427893	-2.42747	0.0152047	0.0398706
ENSG00000124313	IQSEC2	350.466	1.03783	0.176268	-5.88783	3.91e-09	2.99e-08
ENSG00000213760	ATP6V1G2	12.5333	1.03703	0.829861	-1.24964	0.211432	0.355027
ENSG00000178802	MPI	690.57	1.03654	0.1431	-7.24346	4.37e-13	4.86e-12
ENSG00000277400	NA	12.0654	1.0364	0.873439	-1.18657	0.235397	0.38485
ENSG00000235297	NA	14.5871	1.03626	0.777642	-1.33256	0.182676	0.317934
ENSG00000171121	KCNMB3	6.76127	1.03583	1.14672	-0.903292	0.366371	0.531065
ENSG00000106479	ZNF862	160.185	1.03504	0.24398	-4.24231	2.21e-05	0.000103882
ENSG00000088451	TGDS	155.305	1.03337	0.247239	-4.17965	2.92e-05	0.000134542
ENSG00000214184	GCC2-AS1	44.538	1.03334	0.456148	-2.26536	0.0234905	0.0582815
ENSG00000226889	ATF6-DT	22.1104	1.03323	0.650658	-1.58797	0.112292	0.216349
ENSG00000289365	NA	45.1665	1.03264	0.456154	-2.2638	0.0235865	0.0584841
ENSG00000295471	LOC124903737	5.75806	1.03204	1.28584	-0.802621	0.422194	0.587198
ENSG00000175182	FAM131A	375.491	1.03165	0.165372	-6.23834	4.42e-10	3.71e-09
ENSG00000284391	LOC105373244	6.35472	1.03158	1.23747	-0.833624	0.404493	0.569863
ENSG00000159915	ZNF233	9.98362	1.03146	0.930724	-1.10823	0.267762	0.423584
ENSG00000156966	B3GNT7	11.8947	1.03131	0.864356	-1.19316	0.232808	0.381727
ENSG00000188760	TMEM198	54.9228	1.03117	0.408291	-2.52557	0.0115512	0.0314372
ENSG00000268230	NA	15.0557	1.03075	0.791091	-1.30295	0.192591	0.330814
ENSG00000148680	HTR7	49.3867	1.02949	0.438933	-2.34545	0.0190043	0.0484704
ENSG00000166821	PEX11A	41.7175	1.02931	0.467946	-2.19963	0.0278334	0.0675062
ENSG00000099308	MAST3	128.737	1.02917	0.271415	-3.79185	0.000149529	0.000611038
ENSG00000187049	TMEM216	50.3054	1.02916	0.428928	-2.39938	0.0164227	0.0426666
ENSG00000189001	SBSN	31.484	1.02884	0.530531	-1.93927	0.052469	0.116096
ENSG00000275131	NA	27.5191	1.02857	0.570354	-1.80339	0.071327	0.15002
ENSG00000163517	HDAC11	198.126	1.02824	0.219066	-4.69373	2.68e-06	1.44e-05
ENSG00000261659	NA	18.3394	1.02753	0.713372	-1.44038	0.149759	0.272021
ENSG00000197696	NMB	49.1429	1.02561	0.427655	-2.39823	0.0164746	0.0427878
ENSG00000248508	SRP14-DT	26.9971	1.02511	0.678403	-1.51106	0.130773	0.244504
ENSG00000187860	CCDC157	76.3773	1.02483	0.352584	-2.90663	0.00365351	0.0112643
ENSG00000198018	ENTPD7	2674.25	1.02468	0.112996	-9.06825	1.21e-19	2.11e-18
ENSG00000166908	PIP4K2C	1031.63	1.02432	0.119392	-8.57947	9.53e-18	1.48e-16
ENSG00000160285	LSS	2326.89	1.02401	0.0906842	-11.2921	1.44e-29	4.22e-28
ENSG00000154914	USP43	24.9275	1.0234	0.617338	-1.65776	0.0973656	0.193109
ENSG00000167676	PLIN4	8.25183	1.02339	1.13482	-0.901815	0.367155	0.531777
ENSG00000144057	ST6GAL2	863.316	1.02323	0.308842	-3.31311	0.000922652	0.0032473
ENSG00000166548	TK2	958.936	1.02313	0.117097	-8.73746	2.38e-18	3.83e-17
ENSG00000160691	SHC1	9500.13	1.02299	0.0885299	-11.5553	6.94e-31	2.14e-29
ENSG00000300700	NA	59.5285	1.02293	0.402079	-2.5441	0.0109559	0.0299772
ENSG00000164542	MATCAP2	228.718	1.02289	0.232973	-4.39061	1.13e-05	5.55e-05
ENSG00000228426	ZNF32-AS3	11.3709	1.02158	0.89219	-1.14502	0.252201	0.404857
ENSG00000304438	HSD17B1P1	13.3106	1.02146	0.875528	-1.16667	0.243342	0.394439
ENSG00000144199	FAHD2B	42.9224	1.02129	0.470865	-2.16896	0.0300859	0.0721965
ENSG00000255139	NA	10.7742	1.02099	0.892191	-1.14436	0.252475	0.405217
ENSG00000065491	TBC1D22B	292.281	1.02087	0.186703	-5.4679	4.55e-08	3.06e-07
ENSG00000280385	NA	25.0929	1.02049	0.603658	-1.69052	0.0909294	0.182938
ENSG00000271855	NA	7.15931	1.02035	1.12093	-0.91027	0.36268	0.5276
ENSG00000304158	NA	7.15931	1.02035	1.12093	-0.91027	0.36268	0.5276
ENSG00000107738	VSIR	305.711	1.02023	0.190519	-5.35502	8.55e-08	5.59e-07
ENSG00000258279	LINC00592	6.82331	1.01846	1.12239	-0.907408	0.364191	0.528799
ENSG00000168610	STAT3	3594.16	1.01755	0.09129	-11.1464	7.46e-29	2.14e-27
ENSG00000289149	NA	8.58851	1.01753	1.00876	-1.0087	0.313121	0.475157
ENSG00000128284	APOL3	41.9605	1.01733	0.55756	-1.82461	0.0680593	0.144096
ENSG00000170855	TRIAP1	736.428	1.01724	0.132973	-7.65	2.01e-14	2.49e-13
ENSG00000291177	ZNF56P	13.9547	1.0162	0.795266	-1.27781	0.201316	0.341984
ENSG00000070540	WIPI1	619.826	1.01551	0.140088	-7.24908	4.2e-13	4.67e-12
ENSG00000210140	NA	600.588	1.01526	0.137818	-7.36672	1.75e-13	2.01e-12
ENSG00000167565	SERTAD3	433.27	1.01396	0.164069	-6.1801	6.41e-10	5.3e-09
ENSG00000102109	PCSK1N	356.068	1.01298	0.177737	-5.69932	1.2e-08	8.63e-08
ENSG00000185745	IFIT1	144.813	1.01263	0.256544	-3.94722	7.91e-05	0.000338751
ENSG00000181274	FRAT2	230.342	1.01257	0.221676	-4.56778	4.93e-06	2.56e-05
ENSG00000185418	TARS3	116.625	1.01212	0.289193	-3.49981	0.000465589	0.00173326
ENSG00000130150	MOSPD2	466.022	1.01181	0.168647	-5.99956	1.98e-09	1.56e-08
ENSG00000169242	EFNA1	75.7175	1.01148	0.370198	-2.73227	0.00628988	0.0183554
ENSG00000104883	PEX11G	19.5288	1.01128	0.67622	-1.49549	0.134787	0.250334
ENSG00000197361	FBXL22	5.83407	1.01001	1.37475	-0.734682	0.462533	0.624198
ENSG00000005379	TSPOAP1	241.825	1.00985	0.210586	-4.79541	1.62e-06	9.05e-06
ENSG00000162600	OMA1	163.516	1.00966	0.262683	-3.84363	0.000121226	0.000504738
ENSG00000138650	PCDH10	1868.39	1.00867	0.0969584	-10.4031	2.4e-25	5.87e-24
ENSG00000096696	DSP	3554.05	1.00856	0.0821097	-12.283	1.12e-34	3.95e-33
ENSG00000214193	SH3D21	124.047	1.00662	0.288492	-3.48924	0.000484388	0.00179709
ENSG00000270039	NA	10.2256	1.00641	0.955223	-1.05359	0.292071	0.452259
ENSG00000139832	RAB20	43.7546	1.00624	0.463392	-2.17146	0.0298961	0.0718076
ENSG00000116663	FBXO6	10.8083	1.00596	0.89132	-1.12862	0.259059	0.413182
ENSG00000153283	CD96	34.5688	1.0056	0.503517	-1.99715	0.045809	0.103545
ENSG00000053747	LAMA3	33.8402	1.00495	0.509791	-1.97131	0.0486888	0.109027
ENSG00000143178	TBX19	15.0959	1.00465	0.76216	-1.31816	0.187449	0.324579
ENSG00000213563	C8orf82	359.532	1.00427	0.175494	-5.72251	1.05e-08	7.6e-08
ENSG00000289884	LOC105374191	9.36515	1.00399	0.965678	-1.03967	0.298493	0.45937
ENSG00000141503	MINK1	2946.31	1.00399	0.0887187	-11.3165	1.09e-29	3.21e-28
ENSG00000257219	LNCOG	171.425	1.00374	0.235139	-4.2687	1.97e-05	9.3e-05
ENSG00000131732	ZCCHC9	339.027	1.0035	0.172678	-5.8114	6.2e-09	4.61e-08
ENSG00000198133	TMEM229B	17.2258	1.00322	0.72395	-1.38576	0.165819	0.294952
ENSG00000205559	CHKB-DT	35.4773	1.00245	0.502653	-1.99432	0.0461173	0.104141
ENSG00000196668	LINC00173	4.74155	1.00232	1.35647	-0.738918	0.459957	0.622162
ENSG00000161653	NAGS	40.4656	1.00182	0.468422	-2.13871	0.0324592	0.0770304
ENSG00000259518	LINC01583	66.1694	1.00133	0.412203	-2.42922	0.0151314	0.0396909
ENSG00000275454	NA	4.27363	1.00123	1.53343	-0.652934	0.513799	0.67085
ENSG00000141854	MISP3	7.92197	1.0004	1.07412	-0.931368	0.351663	0.51653
ENSG00000132906	CASP9	168.262	1.00021	0.242989	-4.11628	3.85e-05	0.000173656
ENSG00000233058	NA	13.7567	1.00018	0.794182	-1.25939	0.20789	0.35045
ENSG00000293471	NA	8.88326	0.999317	1.03193	-0.968395	0.332847	0.495912
ENSG00000136267	DGKB	3.55903	0.999165	1.6578	-0.602706	0.546704	0.700012
ENSG00000100320	RBFOX2	5861.66	0.999101	0.0807726	-12.3693	3.83e-35	1.37e-33
ENSG00000115129	TP53I3	784.732	0.997907	0.131346	-7.59753	3.02e-14	3.68e-13
ENSG00000181097	NA	5.44217	0.997847	1.25081	-0.797759	0.425011	0.589995
ENSG00000163536	SERPINI1	36.0941	0.997725	0.493878	-2.02018	0.0433643	0.0988266
ENSG00000143919	CAMKMT	94.6255	0.997383	0.332446	-3.00013	0.00269862	0.00856638
ENSG00000258099	ATXN2-AS	10.4304	0.997373	0.920955	-1.08298	0.278819	0.437469
ENSG00000250492	INTS6P1	4.72757	0.997274	1.35085	-0.738258	0.460358	0.62255
ENSG00000158109	TPRG1L	1826.64	0.996397	0.0964887	-10.3266	5.34e-25	1.28e-23
ENSG00000130529	TRPM4	254.343	0.995893	0.198653	-5.01323	5.35e-07	3.16e-06
ENSG00000220920	RPS12P12	4.01297	0.99584	1.48967	-0.668498	0.503816	0.661149
ENSG00000114670	NEK11	129.382	0.995689	0.269285	-3.69754	0.000217703	0.000864294
ENSG00000140104	CLBA1	340.101	0.994613	0.172387	-5.76966	7.94e-09	5.84e-08
ENSG00000231290	APCDD1L-DT	20.3541	0.993631	0.676204	-1.46942	0.141718	0.260607
ENSG00000179909	ZNF154	39.8191	0.99358	0.470727	-2.11074	0.0347949	0.0817999
ENSG00000172738	TMEM217	15.9626	0.993256	0.741011	-1.34041	0.180113	0.314361
ENSG00000258728	NA	3.54505	0.992779	1.6746	-0.592847	0.553284	0.705871
ENSG00000089123	TASP1	133.217	0.992575	0.263387	-3.7685	0.000164231	0.000667271
ENSG00000157191	NECAP2	1426.58	0.992197	0.102315	-9.69745	3.09e-22	6.34e-21
ENSG00000235530	TMEM11-DT	7.55802	0.992183	1.06291	-0.933463	0.350581	0.515523
ENSG00000267397	NA	18.0358	0.99205	0.728395	-1.36197	0.173208	0.305134
ENSG00000186174	BCL9L	3755.28	0.991655	0.212378	-4.66928	3.02e-06	1.62e-05
ENSG00000197019	SERTAD1	433.789	0.991034	0.161631	-6.13144	8.71e-10	7.13e-09
ENSG00000003249	DBNDD1	488.584	0.991033	0.152392	-6.50317	7.86e-11	7.07e-10
ENSG00000226525	RPS7P10	39.5026	0.9906	0.483798	-2.04755	0.040604	0.0933313
ENSG00000165698	SPACA9	159.115	0.990192	0.244054	-4.05726	4.97e-05	0.000219621
ENSG00000227210	WDR35-DT	4.9463	0.989628	1.48696	-0.665538	0.505706	0.662884
ENSG00000239246	RPS10P26	5.54614	0.9888	1.31968	-0.749271	0.453694	0.616224
ENSG00000175728	LINC02873	5.41422	0.988776	1.25621	-0.787109	0.431218	0.595737
ENSG00000203711	LINC02901	8.37659	0.988264	1.01769	-0.97109	0.331504	0.49457
ENSG00000157578	LCA5L	17.2071	0.987541	0.750673	-1.31554	0.188328	0.32541
ENSG00000296622	NA	18.4897	0.986587	0.786208	-1.25487	0.209527	0.352555
ENSG00000287261	HPS1-AS1	9.90976	0.986483	0.976464	-1.01026	0.31237	0.474437
ENSG00000179151	EDC3	965.608	0.985725	0.117177	-8.4123	4.02e-17	5.99e-16
ENSG00000308554	NA	12.0984	0.985209	0.994623	-0.990536	0.321912	0.484532
ENSG00000198517	MAFK	954.775	0.984877	0.122544	-8.03692	9.21e-16	1.25e-14
ENSG00000250548	LINC01303	16.1254	0.984653	0.777656	-1.26618	0.205449	0.347307
ENSG00000117758	STX12	972.947	0.984536	0.114715	-8.58247	9.29e-18	1.44e-16
ENSG00000236540	NA	8.23069	0.984312	1.04247	-0.944208	0.345063	0.509571
ENSG00000021645	NRXN3	352.283	0.984044	0.20149	-4.88383	1.04e-06	5.97e-06
ENSG00000158825	CDA	8.56669	0.984018	1.09089	-0.902028	0.367042	0.53166
ENSG00000135148	TRAFD1	730.815	0.983952	0.132913	-7.403	1.33e-13	1.54e-12
ENSG00000144843	ADPRH	54.1801	0.982699	0.424262	-2.31626	0.0205443	0.05187
ENSG00000147804	SLC39A4	108.972	0.98267	0.298885	-3.28779	0.00100979	0.00352357
ENSG00000249274	PDLIM1P4	13.1662	0.98241	0.830382	-1.18308	0.236776	0.386717
ENSG00000291317	TMEM276	76.875	0.982396	0.341726	-2.87481	0.0040427	0.0123476
ENSG00000272620	AFAP1-AS1	10.2464	0.981636	0.998492	-0.983119	0.325549	0.488407
ENSG00000105223	PLD3	2291.93	0.981072	0.0908443	-10.7995	3.46e-27	9.29e-26
ENSG00000120049	KCNIP2	7.97003	0.980962	1.10063	-0.891276	0.372781	0.537663
ENSG00000078902	TOLLIP	1610.75	0.980795	0.0985473	-9.95252	2.46e-23	5.35e-22
ENSG00000143409	MINDY1	232.43	0.980761	0.211063	-4.64678	3.37e-06	1.79e-05
ENSG00000250041	LOC124902629	5.75022	0.979814	1.43691	-0.68189	0.495308	0.653983
ENSG00000198743	SLC5A3	830.1	0.97931	0.1226	-7.98786	1.37e-15	1.84e-14
ENSG00000103091	WDR59	662.474	0.978805	0.137979	-7.09387	1.3e-12	1.38e-11
ENSG00000289198	NA	10.5685	0.977961	0.906622	-1.07869	0.280728	0.439534
ENSG00000174456	C12orf76	112.942	0.977824	0.288484	-3.38953	0.000700127	0.00252179
ENSG00000140743	CDR2	1157.45	0.977053	0.123211	-7.92993	2.19e-15	2.91e-14
ENSG00000213406	NA	30.1442	0.976527	0.539312	-1.81069	0.0701889	0.147989
ENSG00000214827	MTCP1	18.8752	0.976015	0.67645	-1.44285	0.149063	0.270995
ENSG00000155324	GRAMD2B	796.877	0.975834	0.135926	-7.17915	7.01e-13	7.62e-12
ENSG00000278918	NA	6.20483	0.975809	1.17972	-0.827151	0.408151	0.57319
ENSG00000126803	HSPA2	207.628	0.9758	0.216795	-4.50103	6.76e-06	3.45e-05
ENSG00000136048	DRAM1	860.901	0.975672	0.125809	-7.75519	8.82e-15	1.12e-13
ENSG00000216906	NA	10.5545	0.975606	0.902871	-1.08056	0.279893	0.438505
ENSG00000294550	NA	5.75089	0.975439	1.26824	-0.769129	0.441816	0.605101
ENSG00000090661	CERS4	19.4439	0.975345	0.682741	-1.42857	0.153127	0.276814
ENSG00000196235	SUPT5H	3465.76	0.974815	0.0847462	-11.5028	1.28e-30	3.92e-29
ENSG00000158480	SPATA2	467.193	0.974288	0.159812	-6.09644	1.08e-09	8.81e-09
ENSG00000188735	TMEM120B	446.572	0.9736	0.155584	-6.25771	3.91e-10	3.29e-09
ENSG00000133247	KMT5C	168.156	0.973005	0.240624	-4.04367	5.26e-05	0.000231628
ENSG00000145335	SNCA	491.855	0.972428	0.154055	-6.31223	2.75e-10	2.36e-09
ENSG00000204947	ZNF425	50.7456	0.972268	0.451499	-2.15342	0.0312856	0.074647
ENSG00000143322	ABL2	3981.51	0.972255	0.0935317	-10.3949	2.62e-25	6.39e-24
ENSG00000289526	NA	7.0234	0.971834	1.15799	-0.839244	0.401333	0.566936
ENSG00000111186	WNT5B	4474.14	0.971762	0.0794787	-12.2267	2.24e-34	7.84e-33
ENSG00000139410	SDSL	99.5563	0.971596	0.301426	-3.22333	0.00126708	0.0043135
ENSG00000086730	LAT2	60.3459	0.970357	0.40553	-2.39281	0.0167199	0.043342
ENSG00000151014	NOCT	299.559	0.969533	0.189141	-5.12597	2.96e-07	1.8e-06
ENSG00000125868	DSTN	10736.5	0.969198	0.0828024	-11.705	1.2e-31	3.82e-30
ENSG00000167074	TEF	369.186	0.968937	0.16998	-5.7003	1.2e-08	8.59e-08
ENSG00000280383	NA	6.42357	0.968705	1.23895	-0.781873	0.434289	0.598206
ENSG00000280721	LINC01943	5.85486	0.967878	1.24158	-0.779555	0.435653	0.599354
ENSG00000126562	WNK4	83.1283	0.967871	0.338372	-2.86038	0.00423138	0.0128589
ENSG00000181929	PRKAG1	8.27876	0.967559	1.03522	-0.934645	0.349971	0.514981
ENSG00000180257	ZNF816	23.6849	0.967382	0.611593	-1.58174	0.113709	0.218433
ENSG00000174695	TMEM167A	2397.14	0.967044	0.0892574	-10.8343	2.37e-27	6.41e-26
ENSG00000205730	ITPRIPL2	1499.42	0.966364	0.100453	-9.62004	6.58e-22	1.32e-20
ENSG00000160336	ZNF761	163.592	0.965339	0.243478	-3.96478	7.35e-05	0.000316204
ENSG00000126603	GLIS2	699.767	0.96516	0.128908	-7.48717	7.04e-14	8.36e-13
ENSG00000163453	IGFBP7	14970.4	0.964879	0.093176	-10.3554	3.95e-25	9.53e-24
ENSG00000006451	RALA	2152.4	0.964561	0.0928006	-10.3939	2.64e-25	6.44e-24
ENSG00000209082	NA	84.402	0.964208	0.344958	-2.79515	0.0051876	0.015451
ENSG00000307500	NA	9.78397	0.963721	0.937361	-1.02812	0.303892	0.46544
ENSG00000181218	H2AC25	136.1	0.963363	0.265165	-3.63307	0.000280073	0.00108911
ENSG00000284308	C2orf81	10.8492	0.963112	0.927105	-1.03884	0.29888	0.459748
ENSG00000233237	LINC00472	395.764	0.962993	0.165362	-5.82354	5.76e-09	4.3e-08
ENSG00000116678	LEPR	624.091	0.961978	0.136283	-7.05866	1.68e-12	1.75e-11
ENSG00000134986	NREP	280.936	0.96057	0.231377	-4.15154	3.3e-05	0.00015095
ENSG00000226516	FAM138B	17.4381	0.960313	0.710176	-1.35222	0.176305	0.309022
ENSG00000156958	GALK2	247.052	0.959809	0.20515	-4.67858	2.89e-06	1.55e-05
ENSG00000171223	JUNB	796.119	0.959442	0.143877	-6.66849	2.58e-11	2.44e-10
ENSG00000112658	SRF	2062.82	0.959343	0.0925665	-10.3638	3.62e-25	8.75e-24
ENSG00000102096	PIM2	316.891	0.958469	0.179412	-5.34227	9.18e-08	5.98e-07
ENSG00000303233	NA	18.84	0.957389	0.715257	-1.33852	0.180726	0.315171
ENSG00000237938	NA	11.7578	0.956738	0.895891	-1.06792	0.285558	0.444955
ENSG00000286015	NA	4.74768	0.955521	1.39302	-0.685934	0.492754	0.65158
ENSG00000163637	PRICKLE2	345.405	0.955432	0.179639	-5.31862	1.05e-07	6.76e-07
ENSG00000167377	ZNF23	33.9916	0.954145	0.509836	-1.87148	0.0612792	0.132299
ENSG00000188015	S100A3	88.7685	0.954118	0.32006	-2.98106	0.00287256	0.00906736
ENSG00000228172	NA	8.34079	0.954068	1.02537	-0.930462	0.352132	0.516902
ENSG00000151093	OXSM	148.363	0.953763	0.255921	-3.72679	0.000193935	0.00077712
ENSG00000167107	ACSF2	339.805	0.953435	0.182114	-5.23537	1.65e-07	1.04e-06
ENSG00000136830	NIBAN2	22311.4	0.953032	0.0687894	-13.8543	1.2e-43	5.9e-42
ENSG00000159761	C16orf86	5.11231	0.952545	1.29592	-0.735033	0.462319	0.624116
ENSG00000257913	DDN-AS1	9.84601	0.952377	0.9347	-1.01891	0.308245	0.470252
ENSG00000169118	CSNK1G1	832.115	0.951922	0.132439	-7.18761	6.59e-13	7.18e-12
ENSG00000083123	BCKDHB	426.546	0.951667	0.172592	-5.51396	3.51e-08	2.39e-07
ENSG00000176410	DNAJC30	477.992	0.951354	0.152877	-6.22302	4.88e-10	4.06e-09
ENSG00000185761	ADAMTSL5	65.5763	0.950773	0.369273	-2.57471	0.0100323	0.0277197
ENSG00000082512	TRAF5	403.352	0.950628	0.163492	-5.81454	6.08e-09	4.53e-08
ENSG00000238041	NA	5.79896	0.950383	1.22415	-0.77636	0.437537	0.600896
ENSG00000234869	LINC02925	37.5575	0.950249	0.492633	-1.92892	0.0537407	0.118565
ENSG00000284691	LOC728743	21.5625	0.950168	0.69853	-1.36024	0.173754	0.305766
ENSG00000129667	RHBDF2	493.263	0.950005	0.147606	-6.43611	1.23e-10	1.08e-09
ENSG00000205707	ETFRF1	254.485	0.949684	0.206148	-4.6068	4.09e-06	2.15e-05
ENSG00000134030	CTIF	1131.33	0.949271	0.110205	-8.61366	7.08e-18	1.11e-16
ENSG00000162654	GBP4	11.6732	0.949228	0.908597	-1.04472	0.296153	0.45676
ENSG00000166900	STX3	1237.59	0.949092	0.108625	-8.73733	2.39e-18	3.83e-17
ENSG00000172986	GXYLT2	44.3403	0.948742	0.449986	-2.10838	0.0349982	0.082254
ENSG00000130813	SHFL	216.907	0.948058	0.21819	-4.3451	1.39e-05	6.76e-05
ENSG00000285331	TCF12-DT	24.0904	0.947583	0.620006	-1.52835	0.126427	0.23807
ENSG00000099194	SCD	11159.5	0.946881	0.180308	-5.25148	1.51e-07	9.57e-07
ENSG00000273117	INSIG1-DT	74.9218	0.946573	0.345698	-2.73815	0.00617856	0.0180661
ENSG00000203880	PCMTD2	608.242	0.946569	0.142242	-6.65464	2.84e-11	2.67e-10
ENSG00000084636	COL16A1	112.554	0.946408	0.311382	-3.03938	0.00237063	0.00763516
ENSG00000170581	STAT2	1698.66	0.94605	0.0979515	-9.65836	4.53e-22	9.18e-21
ENSG00000304722	NA	12.8285	0.946047	0.820625	-1.15284	0.248978	0.401301
ENSG00000262185	LINC02861	16.8616	0.946028	0.735884	-1.28557	0.198594	0.338559
ENSG00000233554	B4GALT1-AS1	13.5151	0.945369	0.797762	-1.18503	0.236007	0.385654
ENSG00000162039	MEIOB	4.39771	0.944393	1.38699	-0.680893	0.495939	0.654551
ENSG00000198478	SH3BGRL2	52.5871	0.944364	0.425564	-2.21909	0.0264806	0.0645611
ENSG00000137959	IFI44L	154.237	0.944286	0.249143	-3.79014	0.000150561	0.000614638
ENSG00000177169	ULK1	1703.07	0.944262	0.0987387	-9.56324	1.14e-21	2.26e-20
ENSG00000185909	KLHDC8B	310.415	0.944216	0.186801	-5.05466	4.31e-07	2.58e-06
ENSG00000160209	PDXK	2655.64	0.944203	0.0880607	-10.7222	8.01e-27	2.11e-25
ENSG00000153684	GOLGA8F	18.4676	0.944139	0.707192	-1.33505	0.181859	0.316748
ENSG00000242028	HYPK	10.1687	0.943368	0.932977	-1.01114	0.311951	0.473975
ENSG00000181004	BBS12	193.048	0.943153	0.220814	-4.27125	1.94e-05	9.21e-05
ENSG00000237803	PIRAT1	25.6151	0.943025	0.586206	-1.60869	0.107684	0.209349
ENSG00000198774	RASSF9	160.553	0.942446	0.24572	-3.83545	0.000125335	0.000520386
ENSG00000096872	IFT74	298.094	0.941853	0.207927	-4.52972	5.91e-06	3.04e-05
ENSG00000175224	ATG13	2149.12	0.941399	0.0949009	-9.91981	3.41e-23	7.33e-22
ENSG00000213025	NA	7.02953	0.940908	1.15036	-0.817922	0.413401	0.578365
ENSG00000170525	PFKFB3	798.666	0.940861	0.127575	-7.37499	1.64e-13	1.89e-12
ENSG00000228274	NA	17.1703	0.939921	0.70927	-1.3252	0.185106	0.321502
ENSG00000149577	SIDT2	720.338	0.938938	0.129326	-7.26024	3.86e-13	4.31e-12
ENSG00000239388	ASB14	6.5756	0.938918	1.13862	-0.82461	0.409593	0.574581
ENSG00000145491	ROPN1L	6.5756	0.938918	1.13862	-0.82461	0.409593	0.574581
ENSG00000139209	SLC38A4	6.5756	0.938918	1.13862	-0.82461	0.409593	0.574581
ENSG00000302100	NA	7.26224	0.938558	1.09431	-0.857669	0.391075	0.557244
ENSG00000180211	RPL23P6	24.5365	0.937989	0.593693	-1.57992	0.114125	0.219103
ENSG00000234028	EIF2AK3-DT	16.6737	0.937913	0.777624	-1.20613	0.227768	0.375653
ENSG00000070808	CAMK2A	19.262	0.937598	0.719119	-1.30382	0.192296	0.330377
ENSG00000224897	POT1-AS1	20.8394	0.937596	0.644162	-1.45553	0.145523	0.266045
ENSG00000231721	LINC-PINT	285.635	0.937557	0.202739	-4.62445	3.76e-06	1.99e-05
ENSG00000221821	PEX39	59.071	0.937356	0.389466	-2.40678	0.0160941	0.0418929
ENSG00000265148	TSPOAP1-AS1	20.5889	0.937076	0.758848	-1.23487	0.21688	0.3622
ENSG00000132881	CPLANE2	97.4648	0.936491	0.310077	-3.02019	0.00252614	0.00808654
ENSG00000204396	VWA7	12.072	0.936456	0.850534	-1.10102	0.270888	0.427699
ENSG00000185621	LMLN	238.584	0.936371	0.215233	-4.35049	1.36e-05	6.61e-05
ENSG00000105383	CD33	10.012	0.936131	0.966288	-0.968791	0.33265	0.49572
ENSG00000110921	MVK	566.489	0.936032	0.141381	-6.62065	3.58e-11	3.34e-10
ENSG00000196566	NA	5.87497	0.935431	1.20165	-0.778455	0.436301	0.600015
ENSG00000205221	VIT	18.0649	0.935421	0.702095	-1.33233	0.182752	0.318033
ENSG00000069535	MAOB	5.51034	0.935316	1.31137	-0.713235	0.475701	0.636335
ENSG00000160401	CFAP157	57.907	0.934976	0.435041	-2.14917	0.0316213	0.0753579
ENSG00000087088	BAX	2229.34	0.934021	0.090831	-10.2831	8.4e-25	1.98e-23
ENSG00000185875	THNSL1	178.105	0.933892	0.243659	-3.83279	0.000126699	0.000525381
ENSG00000228748	NA	5.0564	0.933618	1.32068	-0.706922	0.479615	0.63984
ENSG00000288817	NA	4.36975	0.933217	1.38819	-0.672255	0.501421	0.659419
ENSG00000167554	ZNF610	4.36975	0.933217	1.38819	-0.672255	0.501421	0.659419
ENSG00000226314	ZKSCAN8P1	20.6827	0.93314	0.68269	-1.36686	0.17167	0.303104
ENSG00000124574	ABCC10	785.494	0.933132	0.130592	-7.14537	8.98e-13	9.63e-12
ENSG00000184154	LRRC51	58.492	0.9321	0.399031	-2.33591	0.019496	0.0495464
ENSG00000296642	NA	35.1234	0.931848	0.505397	-1.84379	0.0652131	0.139116
ENSG00000288766	NA	5.17435	0.931089	1.28537	-0.724372	0.468837	0.629529
ENSG00000144655	CSRNP1	579.396	0.930164	0.143143	-6.49815	8.13e-11	7.29e-10
ENSG00000203805	PLPP4	2492.98	0.929986	0.0979746	-9.49211	2.26e-21	4.41e-20
ENSG00000114019	AMOTL2	4857.56	0.929971	0.0781305	-11.9028	1.14e-32	3.76e-31
ENSG00000067836	ROGDI	177.992	0.929877	0.247002	-3.76466	0.000166776	0.000676601
ENSG00000160408	ST6GALNAC6	10.2168	0.929854	0.919625	-1.01112	0.311957	0.473975
ENSG00000184428	TOP1MT	196.804	0.929803	0.219341	-4.23907	2.24e-05	0.000105151
ENSG00000164898	FMC1	8.15683	0.929103	1.04433	-0.889665	0.373646	0.538615
ENSG00000186088	GSAP	270.273	0.928439	0.214229	-4.33386	1.47e-05	7.09e-05
ENSG00000287467	NA	6.30096	0.928152	1.24242	-0.747051	0.455033	0.617704
ENSG00000260005	NA	11.3925	0.92798	2.32095	-0.399827	0.689284	0.807945
ENSG00000108861	DUSP3	2418.74	0.927951	0.088065	-10.5371	5.83e-26	1.46e-24
ENSG00000067064	IDI1	1071.38	0.927749	0.140624	-6.59739	4.18e-11	3.86e-10
ENSG00000152661	GJA1	11125.1	0.927469	0.0763621	-12.1457	6.05e-34	2.09e-32
ENSG00000180667	YOD1	988.316	0.927406	0.123708	-7.49675	6.54e-14	7.79e-13
ENSG00000244932	NA	7.33826	0.926687	1.07395	-0.862876	0.388206	0.554196
ENSG00000136114	THSD1	99.3033	0.926643	0.313876	-2.95226	0.00315455	0.00986583
ENSG00000047346	ATOSA	330.169	0.926583	0.182629	-5.07358	3.9e-07	2.35e-06
ENSG00000174327	SLC16A13	101.16	0.926305	0.299912	-3.08859	0.00201108	0.00656923
ENSG00000232533	FAM131B-AS2	162.617	0.926011	0.248391	-3.72803	0.00019298	0.000773863
ENSG00000132471	WBP2	3266.16	0.926006	0.0915812	-10.1113	4.92e-24	1.12e-22
ENSG00000076826	CAMSAP3	19.0183	0.925775	0.677631	-1.36619	0.171879	0.303295
ENSG00000250159	NA	20.3776	0.925397	0.673532	-1.37395	0.169458	0.300051
ENSG00000304841	NA	8.69758	0.925288	1.02087	-0.906373	0.364739	0.529305
ENSG00000129116	PALLD	6207.64	0.925057	0.0871318	-10.6168	2.49e-26	6.4e-25
ENSG00000270021	NA	9.50217	0.924392	0.950264	-0.972773	0.330666	0.493983
ENSG00000131018	SYNE1	1250.56	0.923316	0.11595	-7.96307	1.68e-15	2.24e-14
ENSG00000236753	MKLN1-AS	82.2106	0.923086	0.364789	-2.53046	0.0113912	0.0310403
ENSG00000134086	VHL	1192.97	0.923048	0.109721	-8.41264	4.01e-17	5.98e-16
ENSG00000197860	SGTB	413.249	0.923026	0.16329	-5.65267	1.58e-08	1.12e-07
ENSG00000245573	BDNF-AS	10.7467	0.92297	0.930139	-0.992292	0.321055	0.483643
ENSG00000104765	BNIP3L	4185.09	0.922757	0.0844757	-10.9233	8.92e-28	2.46e-26
ENSG00000141699	RETREG3	998.728	0.922372	0.117565	-7.84564	4.31e-15	5.6e-14
ENSG00000129354	AP1M2	154.931	0.92232	0.247762	-3.7226	0.000197179	0.000788699
ENSG00000154803	FLCN	740.657	0.921833	0.126301	-7.2987	2.91e-13	3.27e-12
ENSG00000196976	LAGE3	251.259	0.921224	0.198464	-4.64178	3.45e-06	1.84e-05
ENSG00000060140	STYK1	5.95098	0.921109	1.21249	-0.759682	0.447445	0.610196
ENSG00000105520	PLPPR2	1216.05	0.920374	0.108917	-8.45026	2.91e-17	4.37e-16
ENSG00000198911	SREBF2	3867.39	0.92028	0.0816599	-11.2697	1.85e-29	5.43e-28
ENSG00000115183	TANC1	1758.45	0.920023	0.0972847	-9.45702	3.17e-21	6.1e-20
ENSG00000301336	NA	11.4054	0.919587	0.892625	-1.03021	0.302913	0.46417
ENSG00000240087	RPSAP12	13.934	0.919362	0.785167	-1.17091	0.241634	0.392333
ENSG00000147164	SNX12	1474.06	0.919296	0.104772	-8.77427	1.72e-18	2.79e-17
ENSG00000169241	SLC50A1	561.449	0.918699	0.144979	-6.33677	2.35e-10	2.02e-09
ENSG00000293106	RPL23AP7	132.621	0.918051	0.263839	-3.47959	0.000502184	0.00185889
ENSG00000214517	PPME1	1551.79	0.91793	0.100173	-9.16346	5.03e-20	9.07e-19
ENSG00000167555	ZNF528	9.10959	0.91749	1.03192	-0.889107	0.373946	0.53898
ENSG00000244187	TMEM141	235.419	0.917303	0.201799	-4.54562	5.48e-06	2.83e-05
ENSG00000198931	APRT	1190.3	0.917243	0.111782	-8.20567	2.29e-16	3.27e-15
ENSG00000119801	YPEL5	1167.32	0.917204	0.116898	-7.8462	4.29e-15	5.58e-14
ENSG00000232160	RAP2C-AS1	44.045	0.916785	0.462311	-1.98305	0.0473623	0.106466
ENSG00000185467	KPNA7	5.13242	0.916693	1.27798	-0.717296	0.473191	0.633914
ENSG00000302400	NA	7.29633	0.916648	1.08813	-0.842406	0.399561	0.565442
ENSG00000236404	VLDLR-AS1	4.79642	0.916543	1.48387	-0.617669	0.536793	0.691155
ENSG00000179222	MAGED1	8842.92	0.916361	0.0866382	-10.5769	3.82e-26	9.66e-25
ENSG00000260643	NA	13.6733	0.916285	0.817858	-1.12035	0.262566	0.417266
ENSG00000249306	LINC01411	14.7106	0.915938	0.762761	-1.20082	0.229821	0.378274
ENSG00000140398	NEIL1	44.017	0.915708	0.459202	-1.99413	0.046138	0.104173
ENSG00000233087	RAB6D	6.25903	0.91529	1.25459	-0.729555	0.465662	0.626399
ENSG00000231989	PPP1R2B	6.60968	0.91489	1.12925	-0.810175	0.41784	0.582879
ENSG00000163235	TGFA	56.7971	0.914589	0.405283	-2.25667	0.0240287	0.0593371
ENSG00000092068	SLC7A8	155.685	0.914272	0.247049	-3.70077	0.000214942	0.000854167
ENSG00000163328	GPR155	79.9781	0.914221	0.336822	-2.71426	0.00664242	0.0192705
ENSG00000180875	GREM2	15.2685	0.913655	0.800204	-1.14178	0.253546	0.406337
ENSG00000142046	TMEM91	19.8151	0.913637	0.662385	-1.37931	0.167798	0.29779
ENSG00000279108	NA	18.0158	0.913543	0.70374	-1.29813	0.194244	0.333022
ENSG00000108771	DHX58	131.017	0.912811	0.275685	-3.31106	0.00092943	0.00326833
ENSG00000180818	HOXC10	5.92303	0.912772	1.19448	-0.764159	0.444772	0.608026
ENSG00000106829	TLE4	835.234	0.91276	0.126595	-7.2101	5.59e-13	6.13e-12
ENSG00000130522	JUND	1876.78	0.912754	0.0960234	-9.50553	1.99e-21	3.88e-20
ENSG00000175105	ZNF654	439.842	0.912416	0.163579	-5.57781	2.44e-08	1.69e-07
ENSG00000110422	HIPK3	1513.98	0.911933	0.120521	-7.56656	3.83e-14	4.62e-13
ENSG00000259642	NA	89.5624	0.911931	0.320088	-2.849	0.00438563	0.0132757
ENSG00000125124	BBS2	413.259	0.911336	0.173309	-5.25843	1.45e-07	9.24e-07
ENSG00000196646	ZNF136	89.653	0.910466	0.316856	-2.87343	0.00406036	0.0123992
ENSG00000107819	SFXN3	3380.56	0.909948	0.0905429	-10.0499	9.2e-24	2.06e-22
ENSG00000271851	NA	25.0095	0.909875	0.589995	-1.54217	0.123031	0.23294
ENSG00000162620	LRRIQ3	16.132	0.909081	0.737531	-1.2326	0.217725	0.363349
ENSG00000130433	CACNG6	12.1827	0.909073	0.858184	-1.0593	0.289464	0.449417
ENSG00000244242	IFITM10	223.801	0.908891	0.223215	-4.07183	4.66e-05	0.000207283
ENSG00000149115	TNKS1BP1	4087.3	0.90889	0.0798058	-11.3888	4.76e-30	1.43e-28
ENSG00000288743	NA	7.38632	0.908582	1.06971	-0.849371	0.395675	0.561381
ENSG00000223485	LINC01615	41.2912	0.908246	0.492885	-1.84272	0.0653705	0.139379
ENSG00000242622	GSK3B-DT	24.3089	0.908178	0.597631	-1.51963	0.128604	0.241445
ENSG00000166225	FRS2	988.169	0.908172	0.117012	-7.76136	8.4e-15	1.07e-13
ENSG00000144476	ACKR3	437.173	0.907787	0.18732	-4.84619	1.26e-06	7.14e-06
ENSG00000145390	USP53	430.188	0.907771	0.162359	-5.59114	2.26e-08	1.57e-07
ENSG00000151006	PRSS53	22.145	0.90737	0.625347	-1.45099	0.146783	0.267869
ENSG00000198160	MIER1	1378.13	0.906937	0.10219	-8.87498	6.99e-19	1.15e-17
ENSG00000290292	HOMEZ	185.921	0.90669	0.224666	-4.03573	5.44e-05	0.000238891
ENSG00000109625	CPZ	8.40965	0.906541	1.05305	-0.860875	0.389307	0.555476
ENSG00000161249	DMKN	57.3075	0.906441	0.403395	-2.24703	0.0246382	0.0606493
ENSG00000248487	ABHD14A	54.443	0.905261	0.41021	-2.20682	0.0273264	0.0664246
ENSG00000272702	NA	17.8172	0.905016	0.704702	-1.28425	0.199053	0.339235
ENSG00000236017	NA	24.7495	0.904822	0.593366	-1.5249	0.127285	0.239437
ENSG00000299228	NA	5.89508	0.9044	1.19477	-0.756968	0.449069	0.611797
ENSG00000129596	CDO1	12.7127	0.903803	0.858758	-1.05245	0.292592	0.452761
ENSG00000215375	MYL5	82.9718	0.90317	0.330189	-2.73531	0.00623214	0.0182032
ENSG00000228649	SNHG26	17.904	0.902848	0.723233	-1.24835	0.211903	0.355525
ENSG00000119711	ALDH6A1	295.114	0.902751	0.183335	-4.92406	8.48e-07	4.91e-06
ENSG00000165813	CCDC186	763.241	0.901941	0.126224	-7.14559	8.96e-13	9.62e-12
ENSG00000164039	BDH2	325.769	0.901465	0.181501	-4.96671	6.81e-07	3.98e-06
ENSG00000150627	WDR17	60.3302	0.900963	0.398229	-2.26243	0.0236711	0.0586494
ENSG00000182310	SPACA6	110.919	0.900578	0.293753	-3.06577	0.00217113	0.00704968
ENSG00000013364	MVP	6683.37	0.900294	0.0739167	-12.1798	3.98e-34	1.39e-32
ENSG00000163898	LIPH	8.82166	0.900046	0.988883	-0.910164	0.362736	0.5276
ENSG00000134824	FADS2	5379.25	0.899697	0.0909398	-9.89332	4.45e-23	9.5e-22
ENSG00000215241	LINC02449	6.23176	0.899223	1.22752	-0.732551	0.463833	0.625279
ENSG00000174851	YIF1A	1473.85	0.899155	0.108246	-8.30663	9.85e-17	1.44e-15
ENSG00000138356	AOX1	1336.46	0.898947	0.112261	-8.00767	1.17e-15	1.58e-14
ENSG00000170949	ZNF160	263.099	0.89822	0.203921	-4.40475	1.06e-05	5.23e-05
ENSG00000036672	USP2	30.2861	0.897469	0.54341	-1.65155	0.0986261	0.195111
ENSG00000291159	NA	25.6929	0.896726	0.633755	-1.41494	0.157086	0.282686
ENSG00000105982	RNF32	15.8301	0.896547	0.742242	-1.20789	0.227089	0.374988
ENSG00000175984	DENND2C	14.4847	0.896449	0.778893	-1.15093	0.249763	0.402107
ENSG00000126458	RRAS	1367.07	0.89582	0.103755	-8.63403	5.92e-18	9.32e-17
ENSG00000270177	NA	16.8108	0.895531	0.762632	-1.17426	0.24029	0.390929
ENSG00000163975	MELTF	40.5152	0.894825	0.484155	-1.84822	0.0645705	0.13798
ENSG00000236618	PITPNA-AS1	6.65774	0.894808	1.12926	-0.792385	0.428136	0.592382
ENSG00000008283	CYB561	814.394	0.894197	0.12531	-7.1359	9.62e-13	1.03e-11
ENSG00000197142	ACSL5	39.1845	0.89384	0.472089	-1.89337	0.0583083	0.126994
ENSG00000105499	PLA2G4C	7.44836	0.893769	1.07633	-0.830384	0.406322	0.571654
ENSG00000180425	C11orf71	20.3239	0.893727	0.650813	-1.37325	0.169676	0.300343
ENSG00000105552	BCAT2	749.218	0.893619	0.133557	-6.6909	2.22e-11	2.1e-10
ENSG00000141542	RAB40B	126.058	0.893547	0.297437	-3.00416	0.00266318	0.0084654
ENSG00000117616	RSRP1	172.232	0.893485	0.258194	-3.46052	0.000539125	0.00198393
ENSG00000294230	NA	4.06784	0.892693	1.57479	-0.566866	0.570805	0.720931
ENSG00000159208	CIART	116.258	0.891654	0.285235	-3.12603	0.00177184	0.00584629
ENSG00000253390	NA	3.71719	0.890771	1.49877	-0.594335	0.552288	0.704912
ENSG00000115266	APC2	192.123	0.890744	0.220984	-4.0308	5.56e-05	0.000243698
ENSG00000160271	RALGDS	79.4891	0.890149	0.34986	-2.5443	0.0109497	0.0299652
ENSG00000302221	NA	8.225	0.889676	1.03672	-0.858168	0.3908	0.557071
ENSG00000198569	SLC34A3	4.72654	0.889466	1.48734	-0.598026	0.549823	0.702315
ENSG00000178201	VN1R1	4.72654	0.889466	1.48734	-0.598026	0.549823	0.702315
ENSG00000175730	NA	6.99442	0.889348	1.13065	-0.786585	0.431525	0.595959
ENSG00000025772	TOMM34	3051.41	0.889113	0.0840786	-10.5748	3.9e-26	9.87e-25
ENSG00000186222	BLOC1S4	328.776	0.888845	0.178854	-4.96967	6.71e-07	3.92e-06
ENSG00000291202	GTF2IP12	41.1365	0.888746	0.463876	-1.91591	0.0553764	0.121451
ENSG00000160284	SPATC1L	267.971	0.888639	0.192499	-4.61634	3.91e-06	2.06e-05
ENSG00000248388	HAFML	7.78503	0.888587	1.06223	-0.836529	0.402858	0.568438
ENSG00000072954	TMEM38A	49.7875	0.888503	0.4239	-2.09602	0.0360805	0.0843845
ENSG00000120913	PDLIM2	365.779	0.887928	0.168364	-5.27388	1.34e-07	8.53e-07
ENSG00000229656	ITGB1-DT	23.5026	0.88779	0.649008	-1.36792	0.171337	0.30282
ENSG00000251615	NA	8.8837	0.887704	0.987364	-0.899065	0.368618	0.533536
ENSG00000130045	NXNL2	16.8875	0.887594	0.750618	-1.18249	0.237013	0.386988
ENSG00000131669	NINJ1	1139.82	0.887213	0.109189	-8.12551	4.45e-16	6.2e-15
ENSG00000244165	P2RY11	63.2241	0.887204	0.426053	-2.08238	0.0373076	0.0866951
ENSG00000226334	NA	21.1626	0.887125	0.638539	-1.38931	0.16474	0.29341
ENSG00000310191	NA	7.42041	0.887048	1.07621	-0.824229	0.409809	0.574727
ENSG00000274718	NA	6.62979	0.88704	1.14444	-0.775084	0.43829	0.601584
ENSG00000271913	TAGAP-AS1	11.4883	0.886725	0.864328	-1.02591	0.304933	0.466633
ENSG00000079459	FDFT1	3089.03	0.886602	0.0991162	-8.94507	3.72e-19	6.22e-18
ENSG00000130827	PLXNA3	1101.58	0.886393	0.115948	-7.64477	2.09e-14	2.58e-13
ENSG00000185567	AHNAK2	6565.44	0.886137	0.251589	-3.52216	0.000428047	0.00160379
ENSG00000012211	PRICKLE3	103.181	0.885886	0.296314	-2.98969	0.0027926	0.00883548
ENSG00000197385	ZNF860	24.8518	0.885572	0.590776	-1.499	0.133874	0.249203
ENSG00000114480	GBE1	3058.92	0.885156	0.088176	-10.0385	1.03e-23	2.3e-22
ENSG00000274512	TBC1D3	37.4673	0.885009	0.485213	-1.82396	0.0681581	0.144229
ENSG00000075391	RASAL2	2128.92	0.884692	0.118208	-7.48422	7.2e-14	8.53e-13
ENSG00000287126	LOC124907726	13.9183	0.884541	0.841467	-1.05119	0.293172	0.453447
ENSG00000183153	GJD3	23.2566	0.884427	0.617102	-1.43319	0.151803	0.274907
ENSG00000134198	TSPAN2	129.387	0.884394	0.613852	-1.44073	0.149661	0.271874
ENSG00000128335	APOL2	708.823	0.884251	0.131768	-6.71067	1.94e-11	1.85e-10
ENSG00000100196	KDELR3	832.09	0.883873	0.129413	-6.82987	8.5e-12	8.39e-11
ENSG00000269481	NA	5.28445	0.883413	1.31439	-0.672111	0.501513	0.659419
ENSG00000112561	TFEB	121.836	0.883281	0.274615	-3.21643	0.00129796	0.0044121
ENSG00000272140	NA	6.61582	0.88298	1.15848	-0.76219	0.445946	0.608815
ENSG00000152256	PDK1	413.019	0.882636	0.164197	-5.37548	7.64e-08	5.01e-07
ENSG00000288675	PANO1	27.5324	0.882385	0.563568	-1.56571	0.117416	0.224418
ENSG00000003402	CFLAR	694.592	0.881737	0.131333	-6.71377	1.9e-11	1.81e-10
ENSG00000269176	NA	5.94314	0.881737	1.20091	-0.734226	0.462811	0.624315
ENSG00000099204	ABLIM1	757.586	0.88081	0.132351	-6.65511	2.83e-11	2.66e-10
ENSG00000158286	RNF207	113.075	0.880565	0.298611	-2.94887	0.00318937	0.009969
ENSG00000172840	PDP2	657.017	0.880512	0.134639	-6.53978	6.16e-11	5.58e-10
ENSG00000242265	PEG10	6638.1	0.880437	0.0784811	-11.2185	3.31e-29	9.61e-28
ENSG00000167671	UBXN6	2603.42	0.880089	0.087374	-10.0727	7.3e-24	1.64e-22
ENSG00000139636	LMBR1L	499.436	0.880053	0.150796	-5.83606	5.35e-09	4e-08
ENSG00000105967	TFEC	24.4599	0.879582	0.595071	-1.47811	0.139378	0.257289
ENSG00000293560	NA	44.6332	0.879379	0.447597	-1.96467	0.0494527	0.110495
ENSG00000018869	ZNF582	7.74311	0.878901	1.062	-0.827593	0.407901	0.573106
ENSG00000286408	NA	9.19242	0.878294	0.981614	-0.894745	0.370924	0.535713
ENSG00000109846	CRYAB	252.342	0.878228	0.197219	-4.45305	8.47e-06	4.25e-05
ENSG00000178429	RPS3AP5	4.83051	0.877617	1.36945	-0.640853	0.521618	0.678021
ENSG00000241935	HOGA1	21.0508	0.877455	0.653468	-1.34277	0.179348	0.313479
ENSG00000171051	FPR1	36.2903	0.877356	0.495804	-1.76956	0.0768	0.159555
ENSG00000051523	CYBA	12.6489	0.877236	0.84374	-1.0397	0.29848	0.45937
ENSG00000153363	LINC00467	64.7024	0.877109	0.423977	-2.06876	0.0385683	0.0893572
ENSG00000120306	CYSTM1	686.308	0.876844	0.12955	-6.7684	1.3e-11	1.26e-10
ENSG00000171889	MIR31HG	888.687	0.876661	0.117814	-7.44108	9.99e-14	1.18e-12
ENSG00000182568	SATB1	397.842	0.876305	0.168662	-5.19562	2.04e-07	1.27e-06
ENSG00000123349	PFDN5	51.6058	0.875673	0.415374	-2.10815	0.0350177	0.082288
ENSG00000131116	ZNF428	498.868	0.874613	0.148166	-5.90293	3.57e-09	2.74e-08
ENSG00000183741	CBX6	3185.37	0.874065	0.101622	-8.60114	7.89e-18	1.23e-16
ENSG00000272886	DCP1A	721.156	0.874039	0.130651	-6.6899	2.23e-11	2.12e-10
ENSG00000179630	LACC1	53.4532	0.873881	0.42127	-2.0744	0.0380425	0.0882144
ENSG00000074590	NUAK1	662.356	0.873857	0.139847	-6.24867	4.14e-10	3.48e-09
ENSG00000168303	MPLKIP	449.32	0.873807	0.156041	-5.59984	2.15e-08	1.5e-07
ENSG00000139637	MYG1	10.8636	0.873774	0.897436	-0.973633	0.330239	0.493654
ENSG00000276345	NA	13.5435	0.873689	0.849707	-1.02822	0.303845	0.46541
ENSG00000160058	BSDC1	1188.78	0.873653	0.107172	-8.15187	3.58e-16	5.05e-15
ENSG00000109072	VTN	5.60715	0.873616	1.25822	-0.694326	0.487478	0.646996
ENSG00000206538	VGLL3	2310.55	0.873422	0.0901253	-9.69119	3.29e-22	6.73e-21
ENSG00000261373	VPS9D1-AS1	14.7716	0.873376	0.78219	-1.11658	0.264175	0.41921
ENSG00000134864	GGACT	11.5223	0.873023	0.858785	-1.01658	0.309354	0.47137
ENSG00000165807	PPP1R36	5.91519	0.872798	1.21952	-0.71569	0.474183	0.634975
ENSG00000174574	AKIRIN1	2013.28	0.872738	0.105684	-8.25798	1.48e-16	2.13e-15
ENSG00000182796	NA	11.3904	0.871695	0.8971	-0.971681	0.331209	0.494466
ENSG00000118960	HS1BP3	522.445	0.871346	0.143981	-6.05182	1.43e-09	1.15e-08
ENSG00000139645	ANKRD52	7157.43	0.871334	0.0960433	-9.07231	1.17e-19	2.04e-18
ENSG00000245317	MRNIP-DT	9.40035	0.871082	0.975291	-0.893151	0.371776	0.536564
ENSG00000104870	FCGRT	415.391	0.870436	0.163615	-5.32001	1.04e-07	6.71e-07
ENSG00000117682	DHDDS	670.522	0.870272	0.132554	-6.56542	5.19e-11	4.75e-10
ENSG00000174564	IL20RB	8.60974	0.869679	1.00098	-0.868832	0.384939	0.551026
ENSG00000133935	ERG28	728.289	0.869619	0.130659	-6.65566	2.82e-11	2.65e-10
ENSG00000001461	NIPAL3	2238.85	0.869527	0.109288	-7.95628	1.77e-15	2.36e-14
ENSG00000276023	DUSP14	958.465	0.869494	0.136179	-6.38496	1.71e-10	1.5e-09
ENSG00000293188	NA	66.3455	0.869362	0.365833	-2.37639	0.0174828	0.0450691
ENSG00000225578	NCBP2-AS1	5.59317	0.86882	1.24836	-0.69597	0.486447	0.645997
ENSG00000179859	RNF227	9.60511	0.868722	1.00177	-0.867188	0.385839	0.55188
ENSG00000237973	MTCO1P12	540.009	0.867473	0.15183	-5.71343	1.11e-08	7.99e-08
ENSG00000162004	CCDC78	40.5644	0.865764	0.467086	-1.85355	0.0638043	0.136831
ENSG00000290033	NA	24.8647	0.865615	0.595535	-1.45351	0.146083	0.266918
ENSG00000164520	RAET1E	16.7376	0.865546	0.747369	-1.15812	0.246813	0.398758
ENSG00000272695	GAS6-DT	304.614	0.865271	0.182255	-4.7476	2.06e-06	1.13e-05
ENSG00000112304	ACOT13	244.606	0.865069	0.204107	-4.2383	2.25e-05	0.000105451
ENSG00000268279	NA	5.22854	0.864729	1.29267	-0.668948	0.503529	0.660985
ENSG00000174943	KCTD13	322.23	0.864374	0.187614	-4.60719	4.08e-06	2.15e-05
ENSG00000168374	ARF4	8090.14	0.863929	0.076857	-11.2407	2.57e-29	7.49e-28
ENSG00000104823	ECH1	664.915	0.86374	0.133889	-6.45116	1.11e-10	9.84e-10
ENSG00000124299	PEPD	1160.07	0.863546	0.107707	-8.01755	1.08e-15	1.46e-14
ENSG00000276293	PIP4K2B	2472.69	0.863479	0.0943008	-9.15664	5.35e-20	9.63e-19
ENSG00000112078	KCTD20	2620.07	0.863436	0.103887	-8.31132	9.46e-17	1.39e-15
ENSG00000232656	IDI2-AS1	14.0291	0.863288	0.806337	-1.07063	0.284337	0.443632
ENSG00000177685	CRACR2B	27.0488	0.862957	0.576495	-1.4969	0.134418	0.249831
ENSG00000160796	NBEAL2	490.455	0.862615	0.15975	-5.39978	6.67e-08	4.42e-07
ENSG00000105559	PLEKHA4	144.186	0.8624	0.254919	-3.38304	0.00071689	0.00257761
ENSG00000232671	ZNF687-AS1	6.66388	0.862125	1.16966	-0.737074	0.461077	0.62308
ENSG00000111696	NT5DC3	673.333	0.86199	0.131617	-6.54925	5.78e-11	5.26e-10
ENSG00000115425	PECR	132.896	0.861631	0.262831	-3.27827	0.00104446	0.0036298
ENSG00000228242	NA	10.1211	0.859724	0.919241	-0.935255	0.349657	0.514704
ENSG00000296372	NA	5.21457	0.859598	1.30128	-0.660579	0.508883	0.665923
ENSG00000178531	CTXN1	956.722	0.859304	0.120537	-7.12899	1.01e-12	1.08e-11
ENSG00000170734	POLH	806.384	0.859294	0.12453	-6.90029	5.19e-12	5.21e-11
ENSG00000197948	FCHSD1	366.317	0.858957	0.168213	-5.10636	3.28e-07	1.99e-06
ENSG00000253519	LOC124901121	9.68112	0.858708	0.971014	-0.884342	0.376512	0.541769
ENSG00000224687	RASAL2-AS1	63.8773	0.858426	0.379816	-2.26011	0.0238145	0.058933
ENSG00000162840	NA	109.841	0.858229	0.300926	-2.85196	0.00434504	0.0131749
ENSG00000006459	KDM7A	85.9643	0.857923	0.327445	-2.62005	0.00879164	0.0246632
ENSG00000125753	VASP	3387	0.857918	0.0832051	-10.3109	6.29e-25	1.49e-23
ENSG00000131069	ACSS2	678.32	0.857734	0.13192	-6.50191	7.93e-11	7.12e-10
ENSG00000290994	FAM86C2P	9.90303	0.856964	1.06069	-0.807929	0.419131	0.584034
ENSG00000216895	RBM33-DT	20.0823	0.856255	0.659519	-1.2983	0.194183	0.332953
ENSG00000099849	RASSF7	413.177	0.856145	0.160044	-5.34943	8.82e-08	5.76e-07
ENSG00000164896	FASTK	1571.29	0.856139	0.104454	-8.19633	2.48e-16	3.52e-15
ENSG00000122390	NAA60	1005.14	0.855771	0.113581	-7.53444	4.9e-14	5.88e-13
ENSG00000205078	SYCE1L	27.6128	0.855438	0.570368	-1.4998	0.133666	0.248972
ENSG00000266053	NDUFV2-AS1	17.7384	0.855422	0.725087	-1.17975	0.2381	0.38823
ENSG00000178440	TIMM23B-AGAP6	4.11591	0.855332	1.46613	-0.583393	0.559629	0.711719
ENSG00000101213	PTK6	4.11591	0.855332	1.46613	-0.583393	0.559629	0.711719
ENSG00000166135	HIF1AN	2755.11	0.854592	0.0871993	-9.80044	1.12e-22	2.34e-21
ENSG00000247903	NA	7.88116	0.85445	1.03816	-0.82304	0.410485	0.575526
ENSG00000300558	NA	5.66918	0.854365	1.25202	-0.682392	0.494991	0.653723
ENSG00000066379	POLR1H	84.5078	0.854243	0.332219	-2.57133	0.010131	0.0279497
ENSG00000127125	PPCS	680.658	0.853889	0.134656	-6.34128	2.28e-10	1.97e-09
ENSG00000271122	HERPUD2-AS1	155.324	0.853654	0.254263	-3.35736	0.000786893	0.00280275
ENSG00000126432	PRDX5	2872.95	0.853571	0.0932512	-9.15346	5.51e-20	9.88e-19
ENSG00000142867	BCL10	595.067	0.853088	0.1528	-5.58305	2.36e-08	1.64e-07
ENSG00000234390	USP27X-DT	17.975	0.852904	0.741133	-1.15081	0.24981	0.402127
ENSG00000293664	NA	45.1066	0.852663	0.483304	-1.76424	0.0776921	0.161061
ENSG00000157353	FCSK	262.653	0.852613	0.202556	-4.20928	2.56e-05	0.000118964
ENSG00000181852	RNF41	1162.48	0.8524	0.116171	-7.33748	2.18e-13	2.48e-12
ENSG00000176422	SPRYD4	410.592	0.852256	0.165171	-5.15985	2.47e-07	1.52e-06
ENSG00000168672	LRATD2	601.258	0.851465	0.15364	-5.54195	2.99e-08	2.05e-07
ENSG00000258168	NA	5.31853	0.851385	1.33934	-0.635673	0.52499	0.681288
ENSG00000167103	PIP5KL1	22.4743	0.851018	0.62507	-1.36148	0.173363	0.305329
ENSG00000171469	ZNF561	705.778	0.850841	0.128621	-6.61511	3.71e-11	3.46e-10
ENSG00000182827	ACBD3	1535.97	0.850744	0.102513	-8.29892	1.05e-16	1.53e-15
ENSG00000120805	ARL1	1979.1	0.850448	0.0958314	-8.87442	7.03e-19	1.15e-17
[truncated: 14,314 more rows]

## Sheet: GO_metascape_500sig
GroupID	Category	Term	Description	LogP	Log(q-value)	Genes	Symbols	InTerm_InList
1_Summary	GO Biological Processes	GO:0000278	mitotic cell cycle	-94.0093	-89.666	332,586,672,699,701,890,891,899,983,990,991,993,994,1021,1026,1033,1062,1063,1163,1164,1263,1894,2177,2491,2697,3619,3832,3833,3835,3837,3925,4085,4171,4172,4173,4175,4193,4436,4605,4628,4751,4998,5347,5422,5426,5501,5885,5921,6491,6502,6790,7272,8243,8318,9088,9133,9212,9319,9493,9700,9735,9787,9833,9918,9928,10051,10112,10376,10383,10403,10460,10592,10615,10926,11004,11065,11073,11113,11130,111…	BIRC5,BCAT1,BRCA1,BUB1,BUB1B,CCNA2,CCNB1,CCNF,CDK1,CDC6,CDC20,CDC25A,CDC25B,CDK6,CDKN1A,CDKN3,CENPE,CENPF,CKS1B,CKS2,PLK3,ECT2,FANCD2,CENPI,GJA1,INCENP,KIF11,KIFC1,KIF22,KPNB1,STMN1,MAD2L1,MCM2,MCM3,MCM4,MCM6,MDM2,MSH2,MYBL2,MYH10,NEK2,ORC1,PLK1,POLA1,POLE,PPP1CC,RAD21,RASA1,STIL,SKP2,AURKA,TTK,SMC1A,CDC45,PKMYT1,CCNB2,AURKB,TRIP13,KIF23,ESPL1,KNTC1,DLGAP5,MELK,NCAPD2,KIF14,SMC4,KIF20A,TUBA1B,TUB…	168/-
1_Member	GO Biological Processes	GO:0000278	mitotic cell cycle	-94.0093	-89.666	332,586,672,699,701,890,891,899,983,990,991,993,994,1021,1026,1033,1062,1063,1163,1164,1263,1894,2177,2491,2697,3619,3832,3833,3835,3837,3925,4085,4171,4172,4173,4175,4193,4436,4605,4628,4751,4998,5347,5422,5426,5501,5885,5921,6491,6502,6790,7272,8243,8318,9088,9133,9212,9319,9493,9700,9735,9787,9833,9918,9928,10051,10112,10376,10383,10403,10460,10592,10615,10926,11004,11065,11073,11113,11130,111…	BIRC5,BCAT1,BRCA1,BUB1,BUB1B,CCNA2,CCNB1,CCNF,CDK1,CDC6,CDC20,CDC25A,CDC25B,CDK6,CDKN1A,CDKN3,CENPE,CENPF,CKS1B,CKS2,PLK3,ECT2,FANCD2,CENPI,GJA1,INCENP,KIF11,KIFC1,KIF22,KPNB1,STMN1,MAD2L1,MCM2,MCM3,MCM4,MCM6,MDM2,MSH2,MYBL2,MYH10,NEK2,ORC1,PLK1,POLA1,POLE,PPP1CC,RAD21,RASA1,STIL,SKP2,AURKA,TTK,SMC1A,CDC45,PKMYT1,CCNB2,AURKB,TRIP13,KIF23,ESPL1,KNTC1,DLGAP5,MELK,NCAPD2,KIF14,SMC4,KIF20A,TUBA1B,TUB…	120/603
1_Member	GO Biological Processes	GO:1903047	mitotic cell cycle process	-91.18	-87.138	332,586,672,699,701,890,891,899,983,990,991,993,994,1021,1026,1033,1062,1063,1163,1164,1263,1894,2177,2491,2697,3619,3832,3833,3835,3837,3925,4085,4171,4172,4173,4175,4193,4436,4605,4628,4751,4998,5347,5422,5426,5501,5885,5921,6491,6502,6790,7272,8243,8318,9088,9133,9212,9319,9493,9700,9735,9787,9833,9918,9928,10051,10112,10403,10460,10592,10615,10926,11004,11065,11073,11113,11130,22974,23310,233…	BIRC5,BCAT1,BRCA1,BUB1,BUB1B,CCNA2,CCNB1,CCNF,CDK1,CDC6,CDC20,CDC25A,CDC25B,CDK6,CDKN1A,CDKN3,CENPE,CENPF,CKS1B,CKS2,PLK3,ECT2,FANCD2,CENPI,GJA1,INCENP,KIF11,KIFC1,KIF22,KPNB1,STMN1,MAD2L1,MCM2,MCM3,MCM4,MCM6,MDM2,MSH2,MYBL2,MYH10,NEK2,ORC1,PLK1,POLA1,POLE,PPP1CC,RAD21,RASA1,STIL,SKP2,AURKA,TTK,SMC1A,CDC45,PKMYT1,CCNB2,AURKB,TRIP13,KIF23,ESPL1,KNTC1,DLGAP5,MELK,NCAPD2,KIF14,SMC4,KIF20A,NDC80,TACC…	112/523
1_Member	GO Biological Processes	GO:0051301	cell division	-66.1744	-62.53	332,699,701,890,891,899,983,990,991,993,994,1021,1062,1063,1163,1164,1894,2771,3070,3619,3832,3833,3925,4085,4628,4751,5347,5501,5885,5921,6790,7153,8243,8914,9133,9212,9493,9585,9700,9735,9918,9928,10051,10112,10376,10403,10460,10592,10615,11004,11065,11113,11130,22974,23310,23397,24137,26271,26586,27338,29127,54443,54821,54892,55143,55165,55320,55752,57082,57405,64151,79892,79980,81610,81620,83…	BIRC5,BUB1,BUB1B,CCNA2,CCNB1,CCNF,CDK1,CDC6,CDC20,CDC25A,CDC25B,CDK6,CENPE,CENPF,CKS1B,CKS2,ECT2,GNAI2,HELLS,INCENP,KIF11,KIFC1,STMN1,MAD2L1,MYH10,NEK2,PLK1,PPP1CC,RAD21,RASA1,AURKA,TOP2A,SMC1A,TIMELESS,CCNB2,AURKB,KIF23,KIF20B,ESPL1,KNTC1,NCAPD2,KIF14,SMC4,KIF20A,TUBA1B,NDC80,TACC3,SMC2,SPAG5,KIF2C,UBE2C,CIT,ZWINT,TPX2,NCAPD3,NCAPH,KIF4A,FBXO5,CKAP2,UBE2S,RACGAP1,ANLN,ERCC6L,NCAPG2,CDCA8,CEP55,M…	92/522
1_Member	GO Biological Processes	GO:0007059	chromosome segregation	-64.3613	-60.796	332,672,699,891,991,1062,1063,2177,2491,3619,3832,3833,3835,3837,4085,4288,4605,4751,5347,5501,5885,6790,7153,7272,8243,9133,9212,9319,9493,9700,9735,9787,9918,9928,10051,10403,10592,10615,11004,11130,22974,23310,23397,24137,26271,29127,29128,54892,55143,55166,55355,55706,55839,56992,57082,57405,64151,79682,79980,81610,81620,81930,83540,90417,113130,140609,146909,147841,151246,157313,157570,20306…	BIRC5,BRCA1,BUB1,CCNB1,CDC20,CENPE,CENPF,FANCD2,CENPI,INCENP,KIF11,KIFC1,KIF22,KPNB1,MAD2L1,MKI67,MYBL2,NEK2,PLK1,PPP1CC,RAD21,AURKA,TOP2A,TTK,SMC1A,CCNB2,AURKB,TRIP13,KIF23,ESPL1,KNTC1,DLGAP5,NCAPD2,KIF14,SMC4,NDC80,SMC2,SPAG5,KIF2C,ZWINT,TPX2,NCAPD3,NCAPH,KIF4A,FBXO5,RACGAP1,UHRF1,NCAPG2,CDCA8,CENPQ,HJURP,NDC1,CENPN,KIF15,KNL1,SPC25,NCAPG,CENPU,DSN1,FAM83D,CDT1,KIF18A,NUF2,KNSTRN,CDCA5,NEK7,KIF…	77/335
1_Member	GO Biological Processes	GO:0051276	chromosome organization	-63.4717	-59.973	332,699,701,891,983,991,1062,1063,2177,2237,2491,3146,3148,3149,3619,3832,3833,3835,3837,4085,4171,4172,4173,4174,4175,4176,4436,4605,4678,4751,5347,5501,5885,5981,5983,6742,7153,7272,8243,8318,9156,9212,9319,9493,9700,9735,9787,9918,9928,10051,10403,10592,10615,10721,10973,11004,11073,11130,22974,23310,23397,24137,29127,29128,51659,54821,54892,55143,55355,55706,55839,56992,57082,57650,64151,7989…	BIRC5,BUB1,BUB1B,CCNB1,CDK1,CDC20,CENPE,CENPF,FANCD2,FEN1,CENPI,HMGB1,HMGB2,HMGB3,INCENP,KIF11,KIFC1,KIF22,KPNB1,MAD2L1,MCM2,MCM3,MCM4,MCM5,MCM6,MCM7,MSH2,MYBL2,NASP,NEK2,PLK1,PPP1CC,RAD21,RFC1,RFC3,SSBP1,TOP2A,TTK,SMC1A,CDC45,EXO1,AURKB,TRIP13,KIF23,ESPL1,KNTC1,DLGAP5,NCAPD2,KIF14,SMC4,NDC80,SMC2,SPAG5,POLQ,ASCC3,KIF2C,TOPBP1,ZWINT,TPX2,NCAPD3,NCAPH,KIF4A,RACGAP1,UHRF1,GINS2,ERCC6L,NCAPG2,CDCA8,…	89/511
1_Member	GO Biological Processes	GO:0098813	nuclear chromosome segregation	-60.0056	-56.565	3.32892e+299	BIRC5,CCNB1,CDC20,CENPE,CENPF,FANCD2,CENPI,INCENP,KIF11,KIFC1,KIF22,KPNB1,MAD2L1,MYBL2,NEK2,PLK1,PPP1CC,AURKA,TOP2A,TTK,SMC1A,CCNB2,AURKB,TRIP13,KIF23,ESPL1,KNTC1,DLGAP5,NCAPD2,KIF14,SMC4,NDC80,SMC2,SPAG5,KIF2C,ZWINT,TPX2,NCAPD3,NCAPH,KIF4A,FBXO5,RACGAP1,UHRF1,NCAPG2,CDCA8,CENPQ,NDC1,KIF15,KNL1,SPC25,NCAPG,DSN1,FAM83D,CDT1,KIF18A,NUF2,KNSTRN,CDCA5,KIF18B,SPC24,SKA1,SKA3,ASPM,SKA2,MZT1	65/234
1_Member	GO Biological Processes	GO:0000819	sister chromatid segregation	-54.3691	-51.026	3.32892e+237	BIRC5,CCNB1,CDC20,CENPE,CENPI,INCENP,KIF11,KIFC1,KIF22,KPNB1,MAD2L1,MYBL2,NEK2,PLK1,PPP1CC,TOP2A,TTK,SMC1A,AURKB,KIF23,ESPL1,KNTC1,DLGAP5,NCAPD2,KIF14,SMC4,NDC80,SMC2,SPAG5,KIF2C,ZWINT,TPX2,NCAPD3,NCAPH,KIF4A,RACGAP1,UHRF1,NCAPG2,CDCA8,KIF15,KNL1,NCAPG,CDT1,KIF18A,NUF2,KNSTRN,CDCA5,KIF18B,SKA1,SKA3,SKA2,MZT1	52/146
1_Member	GO Biological Processes	GO:0140014	mitotic nuclear division	-53.6483	-50.346	3.32892e+247	BIRC5,CCNB1,CDC20,CENPE,CENPI,INCENP,KIF11,KIFC1,KIF22,KPNB1,MAD2L1,MYBL2,NEK2,PLK1,PPP1CC,AURKA,TTK,SMC1A,AURKB,KIF23,ESPL1,KNTC1,DLGAP5,NCAPD2,KIF14,SMC4,NDC80,SMC2,SPAG5,KIF2C,UBE2C,ZWINT,TPX2,NCAPD3,NCAPH,KIF4A,UBE2S,RACGAP1,UHRF1,NCAPG2,CDCA8,KIF15,KNL1,NCAPG,CDT1,KIF18A,NUF2,KNSTRN,CDCA5,KIF18B,SKA1,SKA3,SKA2,MZT1	54/168
1_Member	GO Biological Processes	GO:0000070	mitotic sister chromatid segregation	-53.5399	-50.276	3.32892e+233	BIRC5,CCNB1,CDC20,CENPE,CENPI,INCENP,KIF11,KIFC1,KIF22,KPNB1,MAD2L1,MYBL2,NEK2,PLK1,PPP1CC,TTK,SMC1A,AURKB,KIF23,ESPL1,KNTC1,DLGAP5,NCAPD2,KIF14,SMC4,NDC80,SMC2,SPAG5,KIF2C,ZWINT,TPX2,NCAPD3,NCAPH,KIF4A,RACGAP1,UHRF1,NCAPG2,CDCA8,KIF15,KNL1,NCAPG,CDT1,KIF18A,NUF2,KNSTRN,CDCA5,KIF18B,SKA1,SKA3,SKA2,MZT1	51/142
1_Member	GO Biological Processes	GO:0000280	nuclear division	-50.4657	-47.236	3.32892e+294	BIRC5,CCNB1,CDC20,CDC25B,CENPE,CKS2,FANCA,FANCD2,CENPI,INCENP,KIF11,KIFC1,KIF22,KPNB1,MAD2L1,MYBL2,NEK2,PLK1,PPP1CC,RAD21,AURKA,TOP2A,TTK,SMC1A,CCNB2,AURKB,TRIP13,KIF23,ESPL1,KNTC1,DLGAP5,NCAPD2,KIF14,SMC4,NDC80,SMC2,SPAG5,KIF2C,UBE2C,ZWINT,TPX2,NCAPD3,NCAPH,KIF4A,FBXO5,UBE2S,RACGAP1,UHRF1,NCAPG2,CDCA8,NDC1,KIF15,KNL1,NCAPG,CDT1,KIF18A,NUF2,KNSTRN,CDCA5,KIF18B,SKA1,SKA3,ASPM,SKA2,MZT1	65/320
1_Member	GO Biological Processes	GO:0048285	organelle fission	-48.0109	-44.814	3.32892e+294	BIRC5,CCNB1,CDC20,CDC25B,CENPE,CKS2,FANCA,FANCD2,CENPI,INCENP,KIF11,KIFC1,KIF22,KPNB1,MAD2L1,MYBL2,NEK2,PLK1,PPP1CC,RAD21,AURKA,TOP2A,TTK,SMC1A,CCNB2,AURKB,TRIP13,KIF23,ESPL1,KNTC1,DLGAP5,NCAPD2,KIF14,SMC4,NDC80,SMC2,SPAG5,KIF2C,UBE2C,ZWINT,TPX2,NCAPD3,NCAPH,KIF4A,FBXO5,UBE2S,RACGAP1,UHRF1,NCAPG2,CDCA8,NDC1,KIF15,KNL1,NCAPG,CDT1,KIF18A,NUF2,KNSTRN,CDCA5,KIF18B,SKA1,SKA3,ASPM,SKA2,MZT1	65/348
1_Member	GO Biological Processes	GO:0007051	spindle organization	-39.1666	-36.166	3.32892e+202	BIRC5,CCNB1,CDC20,CENPE,PLK3,INCENP,KIF11,KIFC1,KPNB1,STMN1,MYBL2,NEK2,PLK1,STIL,AURKA,TTK,SMC1A,CCNB2,AURKB,KIF23,ESPL1,DLGAP5,NDC80,TACC3,SPAG5,TPX2,KIF4A,SUN2,FBXO5,RACGAP1,UHRF1,CDCA8,KIF15,SPC25,NUF2,KNSTRN,NEK7,TUBB,SKA1,SKA3,ASPM,WDR62,SKA2,MZT1	44/169
1_Member	GO Biological Processes	GO:1902850	microtubule cytoskeleton organization involved in mitosis	-35.2788	-32.367	3.32892e+163	BIRC5,CCNB1,CDK1,CDC20,CENPE,PLK3,GJA1,INCENP,KIF11,KIFC1,KPNB1,STMN1,MAD2L1,MYBL2,NEK2,PLK1,STIL,AURKA,TTK,SMC1A,AURKB,KIF23,ESPL1,DLGAP5,NDC80,TACC3,TPX2,KIF4A,SUN2,RACGAP1,UHRF1,CDCA8,KIF15,SPC25,NUF2,SAPCD2,WDR62,MZT1	38/135
1_Member	GO Biological Processes	GO:0007052	mitotic spindle organization	-33.4416	-30.59	3.32892e+143	BIRC5,CCNB1,CDC20,CENPE,PLK3,INCENP,KIF11,KIFC1,KPNB1,STMN1,MYBL2,NEK2,PLK1,STIL,AURKA,TTK,SMC1A,AURKB,KIF23,DLGAP5,NDC80,TACC3,TPX2,KIF4A,SUN2,RACGAP1,UHRF1,CDCA8,KIF15,SPC25,NUF2,WDR62,MZT1	33/99
1_Member	GO Biological Processes	GO:0000226	microtubule cytoskeleton organization	-31.2121	-28.413	3.32673e+286	BIRC5,BRCA1,CCNB1,CDK1,CDC20,CENPE,PLK3,GJA1,INCENP,KIF11,KIFC1,KPNB1,STMN1,MAD2L1,MYBL2,NEK2,PLK1,STIL,AURKA,TTK,SMC1A,CCNB2,AURKB,KIF23,ESPL1,CCP110,SLK,DLGAP5,KIF20A,TUBA1B,TUBB4B,NDC80,TACC3,SPAG5,PLK4,KIF2C,TPX2,KIF4A,SUN2,FBXO5,RACGAP1,UHRF1,CDCA8,CCDC88A,KIF15,SPC25,KIF18A,NUF2,KATNAL1,TUBA1C,SAPCD2,KNSTRN,NEDD1,NEK7,KIF18B,TUBB,SKA1,SKA3,ASPM,WDR62,SKA2,MZT1	62/578
1_Member	GO Biological Processes	GO:0051225	spindle assembly	-25.5038	-22.909	3.32991e+131	BIRC5,CDC20,INCENP,KIF11,KIFC1,KPNB1,MYBL2,NEK2,AURKA,SMC1A,CCNB2,AURKB,KIF23,NDC80,TPX2,KIF4A,FBXO5,RACGAP1,UHRF1,CDCA8,KIF15,NEK7,TUBB,SKA1,SKA3,ASPM,SKA2,MZT1	28/104
1_Member	GO Biological Processes	GO:0140694	membraneless organelle assembly	-20.1748	-17.761	3.32991e+180	BIRC5,CDC20,CENPE,CENPF,EIF5,INCENP,KIF11,KIFC1,KPNB1,MEF2A,MYBL2,NEK2,AURKA,SMC1A,CCNB2,AURKB,KIF23,KNTC1,CCP110,DLGAP5,NDC80,PLK4,TPX2,KIF4A,FBXO5,RACGAP1,UHRF1,RPS27L,ANLN,CDCA8,KIF15,NEK7,TUBB,SKA1,SKA3,ASPM,WDR62,SKA2,MZT1	39/352
1_Member	GO Biological Processes	GO:0090307	mitotic spindle assembly	-19.0003	-16.611	3.32991e+77	BIRC5,CDC20,INCENP,KIF11,KIFC1,KPNB1,MYBL2,NEK2,SMC1A,AURKB,KIF23,TPX2,KIF4A,RACGAP1,UHRF1,CDCA8,KIF15,MZT1	18/51
2_Summary	Reactome Gene Sets	R-HSA-69278	Cell Cycle, Mitotic	-76.351	-72.485	699,701,890,891,983,990,991,993,994,1021,1026,1030,1031,1062,1063,1163,1719,1869,2237,2491,3014,3842,3930,4001,4171,4172,4173,4174,4175,4605,4751,4998,5347,5422,5426,5885,5933,5981,5983,6241,6790,7112,7153,8243,8318,9133,9212,9700,9735,9738,9918,10051,10112,10376,10383,10403,10592,10733,10762,11004,11065,11130,22974,23310,23397,23511,23594,26271,27338,51053,51512,51659,54821,54892,55143,55166,557…	BUB1,BUB1B,CCNA2,CCNB1,CDK1,CDC6,CDC20,CDC25A,CDC25B,CDK6,CDKN1A,CDKN2B,CDKN2C,CENPE,CENPF,CKS1B,DHFR,E2F1,FEN1,CENPI,H2AX,TNPO1,LBR,LMNB1,MCM2,MCM3,MCM4,MCM5,MCM6,MYBL2,NEK2,ORC1,PLK1,POLA1,POLE,RAD21,RBL1,RFC1,RFC3,RRM2,AURKA,TMPO,TOP2A,SMC1A,CDC45,CCNB2,AURKB,ESPL1,KNTC1,CCP110,NCAPD2,SMC4,KIF20A,TUBA1B,TUBB4B,NDC80,SMC2,PLK4,NUP50,KIF2C,UBE2C,ZWINT,TPX2,NCAPD3,NCAPH,NUP188,ORC6,FBXO5,UBE2S,GM…	183/-
2_Member	Reactome Gene Sets	R-HSA-69278	Cell Cycle, Mitotic	-76.351	-72.485	699,701,890,891,983,990,991,993,994,1021,1026,1030,1031,1062,1063,1163,1719,1869,2237,2491,3014,3842,3930,4001,4171,4172,4173,4174,4175,4605,4751,4998,5347,5422,5426,5885,5933,5981,5983,6241,6790,7112,7153,8243,8318,9133,9212,9700,9735,9738,9918,10051,10112,10376,10383,10403,10592,10733,10762,11004,11065,11130,22974,23310,23397,23511,23594,26271,27338,51053,51512,51659,54821,54892,55143,55166,557…	BUB1,BUB1B,CCNA2,CCNB1,CDK1,CDC6,CDC20,CDC25A,CDC25B,CDK6,CDKN1A,CDKN2B,CDKN2C,CENPE,CENPF,CKS1B,DHFR,E2F1,FEN1,CENPI,H2AX,TNPO1,LBR,LMNB1,MCM2,MCM3,MCM4,MCM5,MCM6,MYBL2,NEK2,ORC1,PLK1,POLA1,POLE,RAD21,RBL1,RFC1,RFC3,RRM2,AURKA,TMPO,TOP2A,SMC1A,CDC45,CCNB2,AURKB,ESPL1,KNTC1,CCP110,NCAPD2,SMC4,KIF20A,TUBA1B,TUBB4B,NDC80,SMC2,PLK4,NUP50,KIF2C,UBE2C,ZWINT,TPX2,NCAPD3,NCAPH,NUP188,ORC6,FBXO5,UBE2S,GM…	97/475
2_Member	Reactome Gene Sets	R-HSA-1640170	Cell Cycle	-75.6774	-71.936	699,701,890,891,983,990,991,993,994,1021,1026,1030,1031,1062,1063,1163,1719,1869,2237,2491,3014,3842,3930,4001,4171,4172,4173,4174,4175,4193,4605,4751,4998,5347,5422,5426,5885,5933,5981,5983,6241,6790,7112,7153,8243,8318,9133,9212,9700,9735,9738,9918,10051,10112,10376,10383,10403,10592,10733,10762,10971,11004,11065,11073,11130,22974,23310,23397,23511,23594,25777,26271,27338,51053,51512,51659,5482…	BUB1,BUB1B,CCNA2,CCNB1,CDK1,CDC6,CDC20,CDC25A,CDC25B,CDK6,CDKN1A,CDKN2B,CDKN2C,CENPE,CENPF,CKS1B,DHFR,E2F1,FEN1,CENPI,H2AX,TNPO1,LBR,LMNB1,MCM2,MCM3,MCM4,MCM5,MCM6,MDM2,MYBL2,NEK2,ORC1,PLK1,POLA1,POLE,RAD21,RBL1,RFC1,RFC3,RRM2,AURKA,TMPO,TOP2A,SMC1A,CDC45,CCNB2,AURKB,ESPL1,KNTC1,CCP110,NCAPD2,SMC4,KIF20A,TUBA1B,TUBB4B,NDC80,SMC2,PLK4,NUP50,YWHAQ,KIF2C,UBE2C,TOPBP1,ZWINT,TPX2,NCAPD3,NCAPH,NUP188,O…	104/584
2_Member	GO Biological Processes	GO:0010564	regulation of cell cycle process	-54.5663	-51.177	332,672,699,701,891,899,983,990,991,993,994,1021,1026,1030,1031,1062,1063,1263,1869,1894,2177,2237,3014,3619,3832,4085,4193,4288,4330,4436,4751,4998,5347,5885,5902,5933,6240,6241,6491,6597,6790,7272,8318,8914,9088,9212,9319,9493,9585,9700,9735,9738,9787,9918,9928,10051,10106,10112,10403,10460,10592,10615,10635,10733,10926,11004,11065,11073,11113,11130,22974,23310,23397,26271,29127,51065,51512,515…	BIRC5,BRCA1,BUB1,BUB1B,CCNB1,CCNF,CDK1,CDC6,CDC20,CDC25A,CDC25B,CDK6,CDKN1A,CDKN2B,CDKN2C,CENPE,CENPF,PLK3,E2F1,ECT2,FANCD2,FEN1,H2AX,INCENP,KIF11,MAD2L1,MDM2,MKI67,MN1,MSH2,NEK2,ORC1,PLK1,RAD21,RANBP1,RBL1,RRM1,RRM2,STIL,SMARCA4,AURKA,TTK,CDC45,TIMELESS,PKMYT1,AURKB,TRIP13,KIF23,KIF20B,ESPL1,KNTC1,CCP110,DLGAP5,NCAPD2,KIF14,SMC4,CTDSP2,KIF20A,NDC80,TACC3,SMC2,SPAG5,RAD51AP1,PLK4,DBF4,KIF2C,UBE2C…	96/776
2_Member	Reactome Gene Sets	R-HSA-68886	M Phase	-42.8415	-39.674	6.99702e+285	BUB1,BUB1B,CCNB1,CDK1,CDC20,CENPE,CENPF,CENPI,H2AX,TNPO1,LBR,LMNB1,NEK2,PLK1,RAD21,TMPO,SMC1A,CCNB2,AURKB,ESPL1,KNTC1,CCP110,NCAPD2,SMC4,KIF20A,TUBA1B,TUBB4B,NDC80,SMC2,PLK4,NUP50,KIF2C,UBE2C,ZWINT,NCAPD3,NCAPH,NUP188,FBXO5,UBE2S,ERCC6L,NCAPG2,CDCA8,CENPQ,NDC1,CENPN,SPC25,NCAPG,DSN1,KIF18A,NUF2,CEP78,TUBA1C,CDCA5,NEDD1,NEK7,SPC24,SGO2,TUBB,SKA1,SKA2,MZT1	61/354
2_Member	Reactome Gene Sets	R-HSA-68877	Mitotic Prometaphase	-41.406	-38.293	6.99702e+216	BUB1,BUB1B,CCNB1,CDK1,CDC20,CENPE,CENPF,CENPI,NEK2,PLK1,RAD21,SMC1A,CCNB2,AURKB,KNTC1,CCP110,NCAPD2,SMC4,TUBA1B,TUBB4B,NDC80,SMC2,PLK4,KIF2C,ZWINT,NCAPH,ERCC6L,CDCA8,CENPQ,CENPN,SPC25,NCAPG,DSN1,KIF18A,NUF2,CEP78,TUBA1C,CDCA5,NEDD1,NEK7,SPC24,SGO2,TUBB,SKA1,SKA2,MZT1	46/173
2_Member	GO Biological Processes	GO:1901987	regulation of cell cycle phase transition	-41.0316	-37.943	3.32673e+284	BIRC5,BRCA1,BUB1,BUB1B,CCNB1,CDK1,CDC6,CDC20,CDC25A,CDC25B,CDK6,CDKN1A,CDKN2B,CDKN2C,CENPE,CENPF,PLK3,E2F1,FANCD2,H2AX,INCENP,MAD2L1,MDM2,MN1,MSH2,ORC1,PLK1,RAD21,RBL1,RRM1,RRM2,STIL,SMARCA4,AURKA,TTK,CDC45,TIMELESS,PKMYT1,AURKB,TRIP13,ESPL1,KNTC1,DLGAP5,KIF14,CTDSP2,NDC80,DBF4,UBE2C,TOPBP1,ZWINT,FBXO5,RPS27L,GTSE1,DTL,ANLN,CDCA8,KNL1,SPC25,CLSPN,WDR76,FAM83D,CDT1,NUF2,CDCA5,SPC24,SKA1,SKA3	67/480
2_Member	GO Biological Processes	GO:0051983	regulation of chromosome segregation	-40.7253	-37.661	3.327e+184	BIRC5,BUB1,BUB1B,CCNB1,CDK1,CDC6,CDC20,CENPE,CENPF,INCENP,MAD2L1,MKI67,PLK1,RAD21,SMARCA4,TTK,AURKB,TRIP13,ESPL1,KNTC1,DLGAP5,NCAPD2,SMC4,NDC80,TACC3,SMC2,KIF2C,UBE2C,ZWINT,NCAPD3,NCAPH,FBXO5,NCAPG2,CDCA8,KNL1,SPC25,NCAPG,NUF2,SPC24,CDCA2,SKA1,SKA3	42/137
2_Member	GO Biological Processes	GO:1905818	regulation of chromosome separation	-39.4878	-36.467	3.327e+150	BIRC5,BUB1,BUB1B,CCNB1,CDC20,CENPF,INCENP,MAD2L1,PLK1,RAD21,TTK,AURKB,TRIP13,ESPL1,KNTC1,DLGAP5,NCAPD2,SMC4,NDC80,SMC2,UBE2C,ZWINT,NCAPD3,NCAPH,FBXO5,NCAPG2,CDCA8,KNL1,SPC25,NCAPG,NUF2,SPC24,SKA1,SKA3	34/77
2_Member	GO Biological Processes	GO:0007346	regulation of mitotic cell cycle	-38.0965	-35.115	3.32673e+285	BIRC5,BRCA1,BUB1,BUB1B,CCNB1,CDK1,CDC6,CDC20,CDC25A,CDC25B,CDK6,CDKN1A,CDKN2B,CDKN2C,CENPE,CENPF,CKS1B,CKS2,PLK3,E2F1,FANCD2,INCENP,MAD2L1,MDM2,MKI67,MSH2,NEK2,ORC1,PLK1,RAD21,RBL1,RRM1,RRM2,STIL,SMARCA4,AURKA,TTK,PKMYT1,AURKB,TRIP13,KIF20B,ESPL1,KNTC1,DLGAP5,KIF14,CTDSP2,NDC80,UBE2C,TOPBP1,ZWINT,FBXO5,GMNN,RPS27L,GTSE1,DTL,ANLN,CDCA8,KNL1,SPC25,CLSPN,NUF2,CDCA5,NEK7,SPC24,CDCA2,SKA1,SKA3	67/533
2_Member	GO Biological Processes	GO:1901990	regulation of mitotic cell cycle phase transition	-37.1663	-34.203	3.32673e+240	BIRC5,BRCA1,BUB1,BUB1B,CCNB1,CDK1,CDC6,CDC20,CDC25A,CDC25B,CDK6,CDKN1A,CDKN2B,CDKN2C,CENPE,CENPF,PLK3,E2F1,INCENP,MAD2L1,MDM2,ORC1,PLK1,RAD21,RBL1,RRM1,RRM2,STIL,SMARCA4,AURKA,TTK,PKMYT1,AURKB,TRIP13,ESPL1,KNTC1,DLGAP5,KIF14,CTDSP2,NDC80,UBE2C,TOPBP1,ZWINT,FBXO5,RPS27L,GTSE1,DTL,ANLN,CDCA8,KNL1,SPC25,CLSPN,NUF2,CDCA5,SPC24,SKA1,SKA3	57/371
2_Member	Reactome Gene Sets	R-HSA-69620	Cell Cycle Checkpoints	-37.1257	-34.18	6.99702e+209	BUB1,BUB1B,CCNA2,CCNB1,CDK1,CDC6,CDC20,CDC25A,CDKN1A,CENPE,CENPF,CENPI,H2AX,MCM2,MCM3,MCM4,MCM5,MCM6,MDM2,ORC1,PLK1,RFC3,CDC45,CCNB2,AURKB,KNTC1,NDC80,YWHAQ,KIF2C,UBE2C,TOPBP1,ZWINT,ORC6,UBE2S,GTSE1,ERCC6L,CDCA8,CENPQ,CENPN,SPC25,CLSPN,DSN1,KIF18A,NUF2,SPC24,SGO2,SKA1,SKA2	48/237
2_Member	Reactome Gene Sets	R-HSA-2555396	Mitotic Metaphase and Anaphase	-35.7691	-32.841	6.99702e+195	BUB1,BUB1B,CCNB1,CDK1,CDC20,CENPE,CENPF,CENPI,TNPO1,LBR,LMNB1,PLK1,RAD21,TMPO,SMC1A,CCNB2,AURKB,ESPL1,KNTC1,TUBA1B,TUBB4B,NDC80,KIF2C,UBE2C,ZWINT,NUP188,FBXO5,UBE2S,ERCC6L,CDCA8,CENPQ,NDC1,CENPN,SPC25,DSN1,KIF18A,NUF2,TUBA1C,CDCA5,SPC24,SGO2,SKA1,SKA2	43/187
2_Member	Reactome Gene Sets	R-HSA-68882	Mitotic Anaphase	-34.5883	-31.692	6.99702e+190	BUB1,BUB1B,CCNB1,CDK1,CDC20,CENPE,CENPF,CENPI,TNPO1,LBR,LMNB1,PLK1,RAD21,TMPO,SMC1A,CCNB2,AURKB,ESPL1,KNTC1,TUBA1B,TUBB4B,NDC80,KIF2C,UBE2C,ZWINT,NUP188,UBE2S,ERCC6L,CDCA8,CENPQ,NDC1,CENPN,SPC25,DSN1,KIF18A,NUF2,TUBA1C,CDCA5,SPC24,SGO2,SKA1,SKA2	42/186
2_Member	Reactome Gene Sets	R-HSA-2500257	Resolution of Sister Chromatid Cohesion	-32.159	-29.321	6.99702e+150	BUB1,BUB1B,CCNB1,CDK1,CDC20,CENPE,CENPF,CENPI,PLK1,RAD21,SMC1A,CCNB2,AURKB,KNTC1,TUBA1B,TUBB4B,NDC80,KIF2C,ZWINT,ERCC6L,CDCA8,CENPQ,CENPN,SPC25,DSN1,KIF18A,NUF2,TUBA1C,CDCA5,SPC24,SGO2,SKA1,SKA2	33/107
2_Member	GO Biological Processes	GO:0010965	regulation of mitotic sister chromatid separation	-31.2338	-28.422	3.327e+116	BIRC5,BUB1,BUB1B,CCNB1,CDC20,CENPF,INCENP,MAD2L1,PLK1,RAD21,TTK,AURKB,TRIP13,ESPL1,KNTC1,DLGAP5,NDC80,UBE2C,ZWINT,FBXO5,CDCA8,KNL1,SPC25,NUF2,SPC24,SKA1,SKA3	27/62
2_Member	GO Biological Processes	GO:0033045	regulation of sister chromatid segregation	-30.5652	-27.778	3.327e+135	BIRC5,BUB1,BUB1B,CCNB1,CDK1,CDC6,CDC20,CENPE,CENPF,INCENP,MAD2L1,PLK1,RAD21,SMARCA4,TTK,AURKB,TRIP13,ESPL1,KNTC1,DLGAP5,NDC80,TACC3,UBE2C,ZWINT,FBXO5,CDCA8,KNL1,SPC25,NUF2,SPC24,SKA1,SKA3	32/108
2_Member	GO Biological Processes	GO:0033044	regulation of chromosome organization	-30.448	-27.673	3.327e+187	BIRC5,BUB1,BUB1B,CCNB1,CDK1,CDC6,CDC20,CENPE,CENPF,FEN1,INCENP,MAD2L1,NEK2,PLK1,RAD21,SMARCA4,TOP2A,TTK,AURKB,TRIP13,ESPL1,KNTC1,DLGAP5,NCAPD2,SMC4,NDC80,TACC3,SMC2,UBE2C,ZWINT,NCAPD3,NCAPH,FBXO5,NCAPG2,CDCA8,KNL1,SPC25,NCAPG,NUF2,NEK7,SPC24,SKA1,SKA3	43/246
2_Member	GO Biological Processes	GO:0007088	regulation of mitotic nuclear division	-30.18	-27.428	3.327e+142	BIRC5,BUB1,BUB1B,CCNB1,CDC20,CENPF,INCENP,MAD2L1,MKI67,NEK2,PLK1,RAD21,AURKA,TTK,PKMYT1,AURKB,TRIP13,KIF20B,ESPL1,KNTC1,DLGAP5,NDC80,UBE2C,ZWINT,FBXO5,CDCA8,KNL1,SPC25,NUF2,SPC24,CDCA2,SKA1,SKA3	33/121
2_Member	GO Biological Processes	GO:0030071	regulation of mitotic metaphase/anaphase transition	-29.9449	-27.204	3.327e+127	BIRC5,BUB1,BUB1B,CCNB1,CDC6,CDC20,CENPE,CENPF,INCENP,MAD2L1,PLK1,RAD21,SMARCA4,TTK,AURKB,TRIP13,ESPL1,KNTC1,DLGAP5,NDC80,UBE2C,ZWINT,FBXO5,CDCA8,KNL1,SPC25,NUF2,SPC24,SKA1,SKA3	30/93
2_Member	GO Biological Processes	GO:0010948	negative regulation of cell cycle process	-29.7499	-27.019	3.32673e+193	BIRC5,BRCA1,BUB1,BUB1B,CCNF,CDK1,CDC6,CDC20,CDKN1A,CDKN2B,CENPF,PLK3,E2F1,FANCD2,H2AX,MAD2L1,MDM2,MSH2,NEK2,ORC1,PLK1,RAD21,RBL1,TTK,CDC45,TIMELESS,PKMYT1,AURKB,TRIP13,ESPL1,KNTC1,CTDSP2,NDC80,TOPBP1,ZWINT,FBXO5,RPS27L,GTSE1,DTL,SPC25,CLSPN,CDT1,NUF2,SPC24,SKA1,SKA3	46/303
2_Member	GO Biological Processes	GO:1902099	regulation of metaphase/anaphase transition of cell cycle	-29.4701	-26.76	3.327e+127	BIRC5,BUB1,BUB1B,CCNB1,CDC6,CDC20,CENPE,CENPF,INCENP,MAD2L1,PLK1,RAD21,SMARCA4,TTK,AURKB,TRIP13,ESPL1,KNTC1,DLGAP5,NDC80,UBE2C,ZWINT,FBXO5,CDCA8,KNL1,SPC25,NUF2,SPC24,SKA1,SKA3	30/96
2_Member	GO Biological Processes	GO:0033047	regulation of mitotic sister chromatid segregation	-28.8147	-26.115	3.327e+106	BIRC5,BUB1,BUB1B,CCNB1,CDK1,CDC20,CENPF,INCENP,MAD2L1,PLK1,RAD21,TTK,AURKB,TRIP13,KNTC1,NDC80,ZWINT,FBXO5,CDCA8,KNL1,SPC25,NUF2,SPC24,SKA1,SKA3	25/58
2_Member	GO Biological Processes	GO:0051783	regulation of nuclear division	-28.4379	-25.748	3.327e+147	BIRC5,BUB1,BUB1B,CCNB1,CDC20,CENPF,INCENP,MAD2L1,MKI67,NEK2,PLK1,RAD21,AURKA,TTK,PKMYT1,AURKB,TRIP13,KIF20B,ESPL1,KNTC1,DLGAP5,NDC80,RAD51AP1,UBE2C,ZWINT,FBXO5,CDCA8,KNL1,SPC25,NUF2,SPC24,CDCA2,SKA1,SKA3	34/147
2_Member	GO Biological Processes	GO:0045786	negative regulation of cell cycle	-27.6859	-25.015	3.32673e+208	BIRC5,BRCA1,BUB1,BUB1B,CCNF,CDK1,CDC6,CDC20,CDK6,CDKN1A,CDKN2B,CENPF,PLK3,E2F1,FANCD2,H2AX,MAD2L1,MDM2,MSH2,NEK2,ORC1,PLK1,RAD21,RBL1,TTK,CDC45,TIMELESS,PKMYT1,AURKB,TRIP13,ESPL1,KNTC1,CTDSP2,NDC80,TOPBP1,ZWINT,FBXO5,GMNN,RPS27L,GTSE1,DTL,SPC25,CLSPN,CDT1,NUF2,SPC24,THAP5,SKA1,SKA3	49/392
2_Member	GO Biological Processes	GO:0000075	cell cycle checkpoint signaling	-27.4896	-24.828	3.32673e+144	BIRC5,BRCA1,BUB1,BUB1B,CDK1,CDC6,CDC20,CDKN1A,CENPF,PLK3,E2F1,FANCD2,H2AX,MAD2L1,MDM2,MSH2,ORC1,PLK1,TTK,CDC45,TIMELESS,AURKB,TRIP13,KNTC1,NDC80,TOPBP1,ZWINT,RPS27L,GTSE1,DTL,SPC25,CLSPN,CDT1,NUF2,SPC24	35/169
2_Member	GO Biological Processes	GO:1901988	negative regulation of cell cycle phase transition	-27.4813	-24.828	3.32673e+170	BIRC5,BRCA1,BUB1,BUB1B,CDK1,CDC6,CDC20,CDKN1A,CDKN2B,CENPF,PLK3,E2F1,FANCD2,H2AX,MAD2L1,MDM2,MSH2,ORC1,PLK1,RAD21,RBL1,TTK,CDC45,TIMELESS,PKMYT1,AURKB,TRIP13,KNTC1,CTDSP2,NDC80,TOPBP1,ZWINT,FBXO5,RPS27L,GTSE1,DTL,SPC25,CLSPN,CDT1,NUF2,SPC24	41/256
2_Member	GO Biological Processes	GO:0051310	metaphase chromosome alignment	-27.1115	-24.467	8.91106e+128	CCNB1,CENPE,CENPF,INCENP,KIFC1,KIF22,KPNB1,TTK,AURKB,KIF14,NDC80,KIF2C,ZWINT,CDCA8,CENPQ,KNL1,SPC25,DSN1,FAM83D,CDT1,KIF18A,NUF2,CDCA5,SPC24,SKA1,SKA3,SKA2	27/83
2_Member	GO Biological Processes	GO:0050000	chromosome localization	-26.8862	-24.25	3.32891e+135	BIRC5,CCNB1,CENPE,CENPF,INCENP,KIFC1,KIF22,KPNB1,TTK,AURKB,DLGAP5,KIF14,NDC80,KIF2C,ZWINT,CDCA8,CENPQ,KNL1,SPC25,DSN1,FAM83D,CDT1,KIF18A,NUF2,CDCA5,SPC24,SKA1,SKA3,SKA2	29/104
2_Member	Reactome Gene Sets	R-HSA-2467813	Separation of Sister Chromatids	-26.8518	-24.225	6.99702e+154	BUB1,BUB1B,CDC20,CENPE,CENPF,CENPI,PLK1,RAD21,SMC1A,AURKB,ESPL1,KNTC1,TUBA1B,TUBB4B,NDC80,KIF2C,UBE2C,ZWINT,UBE2S,ERCC6L,CDCA8,CENPQ,CENPN,SPC25,DSN1,KIF18A,NUF2,TUBA1C,CDCA5,SPC24,SGO2,SKA1,SKA2	33/150
2_Member	GO Biological Processes	GO:0051303	establishment of chromosome localization	-26.5866	-23.968	3.32891e+131	BIRC5,CCNB1,CENPE,CENPF,INCENP,KIFC1,KIF22,KPNB1,TTK,AURKB,KIF14,NDC80,KIF2C,ZWINT,CDCA8,CENPQ,KNL1,SPC25,DSN1,FAM83D,CDT1,KIF18A,NUF2,CDCA5,SPC24,SKA1,SKA3,SKA2	28/96
2_Member	Reactome Gene Sets	R-HSA-9648025	EML4 and NUDC in mitotic spindle formation	-26.1679	-23.557	6.99702e+132	BUB1,BUB1B,CDC20,CENPE,CENPF,CENPI,PLK1,AURKB,KNTC1,TUBA1B,TUBB4B,NDC80,KIF2C,ZWINT,ERCC6L,CDCA8,CENPQ,CENPN,SPC25,DSN1,KIF18A,NUF2,TUBA1C,NEK7,SPC24,SGO2,SKA1,SKA2	28/99
2_Member	GO Biological Processes	GO:0007093	mitotic cell cycle checkpoint signaling	-24.7972	-22.253	3.32673e+123	BIRC5,BRCA1,BUB1,BUB1B,CDK1,CDC6,CDC20,CDKN1A,CENPF,PLK3,FANCD2,MAD2L1,MDM2,MSH2,ORC1,PLK1,TTK,AURKB,TRIP13,KNTC1,NDC80,TOPBP1,ZWINT,RPS27L,GTSE1,DTL,SPC25,CLSPN,NUF2,SPC24	30/133
2_Member	GO Biological Processes	GO:1901991	negative regulation of mitotic cell cycle phase transition	-24.4173	-21.88	3.32673e+141	BIRC5,BRCA1,BUB1,BUB1B,CDK1,CDC6,CDC20,CDKN1A,CDKN2B,CENPF,PLK3,MAD2L1,MDM2,ORC1,PLK1,RAD21,RBL1,TTK,PKMYT1,AURKB,TRIP13,KNTC1,CTDSP2,NDC80,TOPBP1,ZWINT,FBXO5,RPS27L,GTSE1,DTL,SPC25,CLSPN,NUF2,SPC24	34/191
2_Member	Reactome Gene Sets	R-HSA-69618	Mitotic Spindle Checkpoint	-24.1899	-21.659	6.99702e+121	BUB1,BUB1B,CDC20,CENPE,CENPF,CENPI,PLK1,AURKB,KNTC1,NDC80,KIF2C,UBE2C,ZWINT,UBE2S,ERCC6L,CDCA8,CENPQ,CENPN,SPC25,DSN1,KIF18A,NUF2,SPC24,SGO2,SKA1,SKA2	26/93
2_Member	Reactome Gene Sets	R-HSA-5663220	RHO GTPases Activate Formins	-23.9457	-21.422	6.99702e+130	BUB1,BUB1B,CDC20,CENPE,CENPF,CENPI,PFN2,PLK1,AURKB,KNTC1,TUBA1B,TUBB4B,NDC80,KIF2C,ZWINT,ERCC6L,CDCA8,CENPQ,CENPN,SPC25,DSN1,KIF18A,NUF2,TUBA1C,SPC24,SGO2,SKA1,SKA2	28/117
2_Member	Reactome Gene Sets	R-HSA-141424	Amplification of signal from the kinetochores	-23.3423	-20.838	6.99702e+111	BUB1,BUB1B,CDC20,CENPE,CENPF,CENPI,PLK1,AURKB,KNTC1,NDC80,KIF2C,ZWINT,ERCC6L,CDCA8,CENPQ,CENPN,SPC25,DSN1,KIF18A,NUF2,SPC24,SGO2,SKA1,SKA2	24/79
2_Member	Reactome Gene Sets	R-HSA-141444	Amplification of signal from unattached kinetochores via a MAD2 inhibitory signal	-23.3423	-20.838	6.99702e+111	BUB1,BUB1B,CDC20,CENPE,CENPF,CENPI,PLK1,AURKB,KNTC1,NDC80,KIF2C,ZWINT,ERCC6L,CDCA8,CENPQ,CENPN,SPC25,DSN1,KIF18A,NUF2,SPC24,SGO2,SKA1,SKA2	24/79
2_Member	GO Biological Processes	GO:0045930	negative regulation of mitotic cell cycle	-23.1607	-20.662	3.32673e+149	BIRC5,BRCA1,BUB1,BUB1B,CDK1,CDC6,CDC20,CDKN1A,CDKN2B,CENPF,PLK3,FANCD2,MAD2L1,MDM2,MSH2,ORC1,PLK1,RAD21,RBL1,TTK,PKMYT1,AURKB,TRIP13,KNTC1,CTDSP2,NDC80,TOPBP1,ZWINT,FBXO5,RPS27L,GTSE1,DTL,SPC25,CLSPN,NUF2,SPC24	36/240
2_Member	Reactome Gene Sets	R-HSA-195258	RHO GTPase Effectors	-21.9305	-19.438	6.99702e+172	BUB1,BUB1B,CDC20,CENPE,CENPF,CENPI,H2AX,KIF5B,MYH10,PFN2,PLK1,AURKB,KNTC1,KIF14,TUBA1B,TUBB4B,NDC80,NCKAP1,YWHAQ,KIF2C,CIT,ZWINT,CYFIP2,ERCC6L,CDCA8,CENPQ,CENPN,SPC25,DSN1,KIF18A,NUF2,TUBA1C,IQGAP3,SPC24,SGO2,SKA1,SKA2	37/278
2_Member	GO Biological Processes	GO:0033046	negative regulation of sister chromatid segregation	-21.4689	-19.018	3.327e+70	BIRC5,BUB1,BUB1B,CDC20,CENPF,MAD2L1,PLK1,RAD21,TTK,TRIP13,KNTC1,NDC80,ZWINT,FBXO5,SPC25,NUF2,SPC24	17/33
2_Member	GO Biological Processes	GO:0033048	negative regulation of mitotic sister chromatid segregation	-21.4689	-19.018	3.327e+70	BIRC5,BUB1,BUB1B,CDC20,CENPF,MAD2L1,PLK1,RAD21,TTK,TRIP13,KNTC1,NDC80,ZWINT,FBXO5,SPC25,NUF2,SPC24	17/33
2_Member	GO Biological Processes	GO:0045841	negative regulation of mitotic metaphase/anaphase transition	-21.4689	-19.018	3.327e+70	BIRC5,BUB1,BUB1B,CDC20,CENPF,MAD2L1,PLK1,RAD21,TTK,TRIP13,KNTC1,NDC80,ZWINT,FBXO5,SPC25,NUF2,SPC24	17/33
2_Member	GO Biological Processes	GO:2000816	negative regulation of mitotic sister chromatid separation	-21.4689	-19.018	3.327e+70	BIRC5,BUB1,BUB1B,CDC20,CENPF,MAD2L1,PLK1,RAD21,TTK,TRIP13,KNTC1,NDC80,ZWINT,FBXO5,SPC25,NUF2,SPC24	17/33
2_Member	GO Biological Processes	GO:1902100	negative regulation of metaphase/anaphase transition of cell cycle	-20.8923	-18.452	3.327e+70	BIRC5,BUB1,BUB1B,CDC20,CENPF,MAD2L1,PLK1,RAD21,TTK,TRIP13,KNTC1,NDC80,ZWINT,FBXO5,SPC25,NUF2,SPC24	17/35
2_Member	GO Biological Processes	GO:1905819	negative regulation of chromosome separation	-20.8923	-18.452	3.327e+70	BIRC5,BUB1,BUB1B,CDC20,CENPF,MAD2L1,PLK1,RAD21,TTK,TRIP13,KNTC1,NDC80,ZWINT,FBXO5,SPC25,NUF2,SPC24	17/35
2_Member	GO Biological Processes	GO:0051985	negative regulation of chromosome segregation	-20.6213	-18.197	3.327e+70	BIRC5,BUB1,BUB1B,CDC20,CENPF,MAD2L1,PLK1,RAD21,TTK,TRIP13,KNTC1,NDC80,ZWINT,FBXO5,SPC25,NUF2,SPC24	17/36
2_Member	GO Biological Processes	GO:0045839	negative regulation of mitotic nuclear division	-19.4079	-17.014	3.327e+70	BIRC5,BUB1,BUB1B,CDC20,CENPF,MAD2L1,PLK1,RAD21,TTK,TRIP13,KNTC1,NDC80,ZWINT,FBXO5,SPC25,NUF2,SPC24	17/41
2_Member	GO Biological Processes	GO:0007094	mitotic spindle assembly checkpoint signaling	-18.7452	-16.37	3.327e+61	BIRC5,BUB1,BUB1B,CDC20,CENPF,MAD2L1,PLK1,TTK,TRIP13,KNTC1,NDC80,ZWINT,SPC25,NUF2,SPC24	15/30
2_Member	GO Biological Processes	GO:0071173	spindle assembly checkpoint signaling	-18.7452	-16.37	3.327e+61	BIRC5,BUB1,BUB1B,CDC20,CENPF,MAD2L1,PLK1,TTK,TRIP13,KNTC1,NDC80,ZWINT,SPC25,NUF2,SPC24	15/30
2_Member	GO Biological Processes	GO:0071174	mitotic spindle checkpoint signaling	-18.7452	-16.37	3.327e+61	BIRC5,BUB1,BUB1B,CDC20,CENPF,MAD2L1,PLK1,TTK,TRIP13,KNTC1,NDC80,ZWINT,SPC25,NUF2,SPC24	15/30
2_Member	GO Biological Processes	GO:0031577	spindle checkpoint signaling	-18.4645	-16.094	3.327e+61	BIRC5,BUB1,BUB1B,CDC20,CENPF,MAD2L1,PLK1,TTK,TRIP13,KNTC1,NDC80,ZWINT,SPC25,NUF2,SPC24	15/31
2_Member	GO Biological Processes	GO:0051784	negative regulation of nuclear division	-18.1901	-15.829	3.327e+70	BIRC5,BUB1,BUB1B,CDC20,CENPF,MAD2L1,PLK1,RAD21,TTK,TRIP13,KNTC1,NDC80,ZWINT,FBXO5,SPC25,NUF2,SPC24	17/47
2_Member	GO Biological Processes	GO:0007080	mitotic metaphase chromosome alignment	-18.1519	-15.795	8.91106e+84	CCNB1,CENPE,KIFC1,KIF22,KPNB1,TTK,AURKB,KIF14,NDC80,KIF2C,CDCA8,CDT1,KIF18A,NUF2,CDCA5,SKA1,SKA3,SKA2	18/56
2_Member	GO Biological Processes	GO:0051640	organelle localization	-17.9144	-15.567	3.32489e+208	BIRC5,ATP2A2,CCNB1,CENPE,CENPF,GJA1,INCENP,KIF5B,KIFC1,KIF22,KPNB1,LMNB1,MAD2L1,MEF2A,PLK1,TTK,AURKB,ESPL1,DLGAP5,KIF14,NDC80,TACC3,SPAG5,KIF2C,ZWINT,SUN2,TMEM106B,CDCA8,CENPQ,KNL1,SPC25,DSN1,FAM83D,CDT1,KIF18A,NUF2,LMNB2,SAPCD2,CDCA5,PDZD8,SPC24,SKA1,SKA3,ASPM,SKA2	45/551
2_Member	GO Biological Processes	GO:0051656	establishment of organelle localization	-17.2917	-14.953	3.32891e+180	BIRC5,CCNB1,CENPE,CENPF,GJA1,INCENP,KIF5B,KIFC1,KIF22,KPNB1,LMNB1,MAD2L1,PLK1,TTK,AURKB,ESPL1,KIF14,NDC80,TACC3,SPAG5,KIF2C,ZWINT,SUN2,CDCA8,CENPQ,KNL1,SPC25,DSN1,FAM83D,CDT1,KIF18A,NUF2,LMNB2,SAPCD2,CDCA5,SPC24,SKA1,SKA3,SKA2	39/425
2_Member	GO Biological Processes	GO:2001251	negative regulation of chromosome organization	-16.148	-13.83	3.327e+78	BIRC5,BUB1,BUB1B,CDC20,CENPF,MAD2L1,PLK1,RAD21,TOP2A,TTK,TRIP13,ESPL1,KNTC1,NDC80,ZWINT,FBXO5,SPC25,NUF2,SPC24	19/82
2_Member	GO Biological Processes	GO:0010639	negative regulation of organelle organization	-15.9553	-13.645	1.20333e+138	ADD3,BIRC5,BNIP3,BRCA1,BUB1,BUB1B,CAPZA1,CCNF,CDC20,CENPF,LPAR1,GSN,STMN1,MAD2L1,PFN2,PLK1,RAD21,TOP2A,TTK,TRIP13,ESPL1,KNTC1,CCP110,PPIF,NDC80,ZWINT,TPX2,FBXO5,CKAP2,F11R,LIMA1,SPC25,NUF2,SPC24	34/348
2_Member	GO Biological Processes	GO:0008608	attachment of spindle microtubules to kinetochore	-14.8309	-12.559	1.06292e+66	CENPE,AURKB,NDC80,KIF2C,KNL1,SPC25,DSN1,CDT1,NUF2,SPC24,SKA1,SKA3,SKA2	13/32
2_Member	GO Biological Processes	GO:0051129	negative regulation of cellular component organization	-13.3825	-11.156	1.20333e+182	ADD3,BIRC5,BNIP3,BRCA1,BUB1,BUB1B,CAPZA1,CAV1,CCNF,CD47,CDC20,CENPF,DPYSL3,LPAR1,GSN,HMGB1,STMN1,MAD2L1,MDM2,PFN2,PLK1,RAD21,SPOCK1,THBS1,TOP2A,TTK,VEGFA,SNX3,TRIP13,ESPL1,KNTC1,CCP110,KIF14,PPIF,NDC80,ZWINT,TPX2,FBXO5,CKAP2,F11R,LIMA1,SPC25,NUF2,SIRPA,SPC24	45/730
2_Member	GO Biological Processes	GO:0051315	attachment of mitotic spindle microtubules to kinetochore	-11.7442	-9.583	1.06292e+45	CENPE,AURKB,NDC80,KIF2C,CDT1,NUF2,SKA1,SKA3,SKA2	45917
3_Summary	WikiPathways	WP2446	Retinoblastoma gene in cancer	-41.7262	-38.587	890,891,983,993,994,1021,1026,1719,1786,1869,2956,3015,3146,3148,3925,4172,4173,4175,4176,4193,4998,5422,5426,5983,6240,6241,6502,7153,7272,8243,8318,9133,10592,10733,24137,54443,81620,699,701,990,991,1030,1031,4085,4171,4174,5347,5885,5933,9088,9212,9319,9700,10403,10926,10971,23594,26271,57082,113130,157570,672,1063,2175,2177,2237,3014,3149,3150,3835,3838,4436,4678,5981,6742,7398,7468,7832,8208…	CCNA2,CCNB1,CDK1,CDC25A,CDC25B,CDK6,CDKN1A,DHFR,DNMT1,E2F1,MSH6,H2AZ1,HMGB1,HMGB2,STMN1,MCM3,MCM4,MCM6,MCM7,MDM2,ORC1,POLA1,POLE,RFC3,RRM1,RRM2,SKP2,TOP2A,TTK,SMC1A,CDC45,CCNB2,SMC2,PLK4,KIF4A,ANLN,CDT1,BUB1,BUB1B,CDC6,CDC20,CDKN2B,CDKN2C,MAD2L1,MCM2,MCM5,PLK1,RAD21,RBL1,PKMYT1,AURKB,TRIP13,ESPL1,NDC80,DBF4,YWHAQ,ORC6,FBXO5,KNL1,CDCA5,ESCO2,BRCA1,CENPF,FANCA,FANCD2,FEN1,H2AX,HMGB3,HMGN1,KIF22,KPN…	120/-
3_Member	WikiPathways	WP2446	Retinoblastoma gene in cancer	-41.7262	-38.587	8.90892e+147	CCNA2,CCNB1,CDK1,CDC25A,CDC25B,CDK6,CDKN1A,DHFR,DNMT1,E2F1,MSH6,H2AZ1,HMGB1,HMGB2,STMN1,MCM3,MCM4,MCM6,MCM7,MDM2,ORC1,POLA1,POLE,RFC3,RRM1,RRM2,SKP2,TOP2A,TTK,SMC1A,CDC45,CCNB2,SMC2,PLK4,KIF4A,ANLN,CDT1	37/89
3_Member	KEGG Pathway	hsa04110	Cell cycle	-40.5887	-37.546	6.99702e+177	BUB1,BUB1B,CCNA2,CCNB1,CDK1,CDC6,CDC20,CDC25A,CDC25B,CDK6,CDKN1A,CDKN2B,CDKN2C,E2F1,MAD2L1,MCM2,MCM3,MCM4,MCM5,MCM6,MCM7,MDM2,ORC1,PLK1,RAD21,RBL1,SKP2,TTK,SMC1A,CDC45,PKMYT1,CCNB2,AURKB,TRIP13,ESPL1,NDC80,DBF4,YWHAQ,ORC6,FBXO5,KNL1,CDT1,CDCA5,ESCO2	44/158
3_Member	GO Biological Processes	GO:0006259	DNA metabolic process	-34.1564	-31.275	672,983,990,1063,2175,2177,2237,2956,3014,3146,3148,3149,3150,3835,3838,4171,4172,4173,4174,4175,4176,4436,4678,4998,5347,5422,5426,5885,5981,5983,6240,6742,7153,7398,7468,7832,8208,8243,8318,8458,8914,9156,9319,10036,10635,10721,10926,10973,11073,11169,11198,23594,29089,29128,51053,51514,51659,54726,54821,55215,55247,55270,55388,63967,64710,64782,79892,81620,84296,113130,157570,253714,374393	BRCA1,CDK1,CDC6,CENPF,FANCA,FANCD2,FEN1,MSH6,H2AX,HMGB1,HMGB2,HMGB3,HMGN1,KIF22,KPNA2,MCM2,MCM3,MCM4,MCM5,MCM6,MCM7,MSH2,NASP,ORC1,PLK1,POLA1,POLE,RAD21,RFC1,RFC3,RRM1,SSBP1,TOP2A,USP1,NSD2,BTG2,CHAF1B,SMC1A,CDC45,TTF2,TIMELESS,EXO1,TRIP13,CHAF1A,RAD51AP1,POLQ,DBF4,ASCC3,TOPBP1,WDHD1,SUPT16H,ORC6,UBE2T,UHRF1,GMNN,DTL,GINS2,OTUD4,ERCC6L,FANCI,NEIL3,NUDT15,MCM10,CLSPN,NUCKS1,AEN,MCMBP,CDT1,GINS4,CD…	73/747
3_Member	WikiPathways	WP179	Cell cycle	-31.7088	-28.884	6.99891e+130	BUB1,CCNA2,CCNB1,CDK1,CDC6,CDC20,CDC25A,CDC25B,CDK6,CDKN1A,CDKN2B,CDKN2C,E2F1,MCM2,MCM3,MCM4,MCM5,MCM6,MCM7,MDM2,ORC1,PLK1,RAD21,RBL1,SKP2,TTK,SMC1A,CDC45,PKMYT1,CCNB2,ESPL1,DBF4,YWHAQ,ORC6	34/120
3_Member	GO Biological Processes	GO:0006260	DNA replication	-29.7083	-26.988	6.72984e+171	BRCA1,CDK1,CDC6,FEN1,MCM2,MCM3,MCM4,MCM5,MCM6,MCM7,NASP,ORC1,POLA1,POLE,RFC1,RFC3,RRM1,SSBP1,CHAF1B,CDC45,TIMELESS,EXO1,CHAF1A,POLQ,DBF4,TOPBP1,WDHD1,SUPT16H,ORC6,GMNN,DTL,GINS2,MCM10,NUCKS1,MCMBP,CDT1,GINS4,MMS22L,FAM111B	39/198
3_Member	GO Biological Processes	GO:0006281	DNA repair	-28.2139	-25.533	6.72983e+245	BRCA1,CDK1,FANCA,FANCD2,FEN1,MSH6,H2AX,HMGB1,HMGB2,HMGN1,KIF22,MCM2,MCM3,MCM4,MCM5,MCM6,MCM7,MSH2,PLK1,POLA1,POLE,RAD21,RFC1,RFC3,RRM1,USP1,NSD2,BTG2,CHAF1B,SMC1A,CDC45,TTF2,TIMELESS,EXO1,TRIP13,CHAF1A,RAD51AP1,POLQ,ASCC3,TOPBP1,WDHD1,SUPT16H,UBE2T,UHRF1,DTL,GINS2,OTUD4,ERCC6L,FANCI,NEIL3,CLSPN,NUCKS1,GINS4,CDCA5,ESCO2,MMS22L	56/521
3_Member	GO Biological Processes	GO:0006261	DNA-templated DNA replication	-25.3439	-22.756	6.7299e+134	BRCA1,CDC6,FEN1,MCM2,MCM3,MCM4,MCM5,MCM6,MCM7,ORC1,POLA1,POLE,RFC1,RFC3,RRM1,SSBP1,CDC45,TIMELESS,EXO1,POLQ,TOPBP1,WDHD1,ORC6,GMNN,GINS2,MCM10,NUCKS1,MCMBP,CDT1,GINS4,MMS22L	31/140
3_Member	Reactome Gene Sets	R-HSA-69242	S Phase	-25.007	-22.449	8.90991e+126	CCNA2,CDC6,CDC25A,CDC25B,CDKN1A,CKS1B,E2F1,FEN1,MCM2,MCM3,MCM4,MCM5,MCM6,ORC1,POLA1,POLE,RAD21,RFC1,RFC3,SMC1A,CDC45,UBE2C,ORC6,UBE2S,GMNN,GINS2,CDT1,GINS4,CDCA5,ESCO2	30/131
3_Member	Reactome Gene Sets	R-HSA-453279	Mitotic G1 phase and G1/S transition	-24.9152	-22.364	8.90892e+114	CCNA2,CCNB1,CDK1,CDC6,CDC25A,CDK6,CDKN1A,CDKN2B,CDKN2C,CKS1B,DHFR,E2F1,MCM2,MCM3,MCM4,MCM5,MCM6,MYBL2,ORC1,POLA1,POLE,RBL1,RRM2,TOP2A,CDC45,ORC6,FBXO5,GMNN,CDT1	29/120
3_Member	WikiPathways	WP466	DNA replication	-20.838	-18.409	9.90417e+75	CDC6,MCM2,MCM3,MCM4,MCM5,MCM6,MCM7,ORC1,POLA1,POLE,RFC1,RFC3,CDC45,DBF4,ORC6,GMNN,MCM10,CDT1	18/42
3_Member	Reactome Gene Sets	R-HSA-69206	G1/S Transition	-19.8824	-17.484	8.90892e+94	CCNA2,CCNB1,CDK1,CDC6,CDC25A,CDKN1A,CKS1B,DHFR,E2F1,MCM2,MCM3,MCM4,MCM5,MCM6,ORC1,POLA1,POLE,RBL1,RRM2,CDC45,ORC6,FBXO5,GMNN,CDT1	24/107
3_Member	WikiPathways	WP45	G1 to S cell cycle control	-18.3835	-16.018	8.91984e+73	CCNB1,CDK1,CDC25A,CDK6,CDKN1A,CDKN2B,CDKN2C,E2F1,MCM2,MCM3,MCM4,MCM5,MCM6,MCM7,MDM2,ORC1,POLE,CDC45,ORC6	19/64
3_Member	Reactome Gene Sets	R-HSA-69239	Synthesis of DNA	-17.2291	-14.894	8.9099e+88	CCNA2,CDC6,FEN1,MCM2,MCM3,MCM4,MCM5,MCM6,ORC1,POLA1,POLE,RFC1,RFC3,CDC45,UBE2C,ORC6,UBE2S,GMNN,GINS2,CDT1,GINS4	21/96
3_Member	GO Biological Processes	GO:0006302	double-strand break repair	-17.1763	-14.846	6.72218e+127	BRCA1,FANCD2,FEN1,H2AX,HMGB1,HMGB2,MCM2,MCM3,MCM4,MCM5,MCM6,MCM7,MSH2,PLK1,POLA1,RAD21,NSD2,CDC45,TRIP13,RAD51AP1,POLQ,TOPBP1,UHRF1,GINS2,NUCKS1,GINS4,CDCA5,ESCO2,MMS22L	29/220
3_Member	GO Biological Processes	GO:0006270	DNA replication initiation	-15.7723	-13.466	9.90417e+53	CDC6,MCM2,MCM3,MCM4,MCM5,MCM6,MCM7,ORC1,POLA1,CDC45,TOPBP1,ORC6,MCM10	13/28
3_Member	Reactome Gene Sets	R-HSA-68962	Activation of the pre-replicative complex	-15.2803	-12.994	9.90417e+53	CDC6,MCM2,MCM3,MCM4,MCM5,MCM6,ORC1,POLA1,POLE,CDC45,ORC6,GMNN,CDT1	13/30
3_Member	Reactome Gene Sets	R-HSA-69306	DNA Replication	-14.0471	-11.79	8.9099e+96	CCNA2,CDC6,FEN1,H2AX,MCM2,MCM3,MCM4,MCM5,MCM6,ORC1,POLA1,POLE,RFC1,RFC3,SSBP1,CDC45,UBE2C,ORC6,UBE2S,GMNN,GINS2,CDT1,GINS4	23/169
3_Member	GO Biological Processes	GO:0006310	DNA recombination	-13.8448	-11.598	6.72218e+114	BRCA1,FANCD2,FEN1,MSH6,H2AX,HMGB1,HMGB2,HMGB3,MCM2,MCM3,MCM4,MCM5,MCM6,MCM7,MSH2,RAD21,TOP2A,CDC45,EXO1,TRIP13,RAD51AP1,TOPBP1,UHRF1,GINS2,NUCKS1,GINS4,MMS22L	27/250
3_Member	GO Biological Processes	GO:0000727	double-strand break repair via break-induced replication	-13.7557	-11.513	4.17142e+37	MCM2,MCM3,MCM4,MCM5,MCM6,MCM7,CDC45,GINS2,GINS4	45912
3_Member	Reactome Gene Sets	R-HSA-69190	DNA strand elongation	-13.6342	-11.398	2.23742e+49	FEN1,MCM2,MCM3,MCM4,MCM5,MCM6,POLA1,RFC1,RFC3,CDC45,GINS2,GINS4	46021
3_Member	GO Biological Processes	GO:0006275	regulation of DNA replication	-13.4614	-11.232	8.90984e+82	CCNA2,CDK1,CDC6,CDC25A,CDKN1A,MCM2,MCM3,MCM4,MCM5,MCM6,MCM7,RFC3,SSBP1,TIMELESS,DBF4,FBXO5,GMNN,NUCKS1,CDT1,ESCO2	20/128
3_Member	Reactome Gene Sets	R-HSA-176187	Activation of ATR in response to replication stress	-13.0407	-10.824	9.90993e+47	CDC6,CDC25A,MCM2,MCM3,MCM4,MCM5,MCM6,ORC1,RFC3,CDC45,ORC6,CLSPN	12389
3_Member	GO Biological Processes	GO:0071103	DNA conformation change	-12.8976	-10.688	3.14631e+76	HMGB1,HMGB2,HMGB3,MCM2,MCM3,MCM4,MCM5,MCM6,MCM7,RFC3,SSBP1,TOP2A,CDC45,POLQ,ASCC3,GINS2,ERCC6L,GINS4	18/105
3_Member	KEGG Pathway	hsa03030	DNA replication	-12.5126	-10.315	2.23742e+47	FEN1,MCM2,MCM3,MCM4,MCM5,MCM6,MCM7,POLA1,POLE,RFC1,RFC3,SSBP1	13485
3_Member	GO Biological Processes	GO:0032392	DNA geometric change	-12.4566	-10.262	3.14631e+72	HMGB1,HMGB2,HMGB3,MCM2,MCM3,MCM4,MCM5,MCM6,MCM7,RFC3,SSBP1,CDC45,POLQ,ASCC3,GINS2,ERCC6L,GINS4	17/96
3_Member	Reactome Gene Sets	R-HSA-69481	G2/M Checkpoints	-12.1571	-9.969	8.91984e+76	CCNB1,CDK1,CDC6,CDC25A,H2AX,MCM2,MCM3,MCM4,MCM5,MCM6,ORC1,RFC3,CDC45,CCNB2,YWHAQ,TOPBP1,ORC6,GTSE1,CLSPN	19/132
3_Member	GO Biological Processes	GO:0006268	DNA unwinding involved in DNA replication	-12.1363	-9.951	4.17142e+41	MCM2,MCM3,MCM4,MCM5,MCM6,MCM7,SSBP1,CDC45,GINS2,GINS4	45952
3_Member	Reactome Gene Sets	R-HSA-176974	Unwinding of DNA	-12.0904	-9.911	4.17142e+33	MCM2,MCM3,MCM4,MCM5,MCM6,CDC45,GINS2,GINS4	45880
3_Member	GO Biological Processes	GO:0090329	regulation of DNA-templated DNA replication	-11.9389	-9.772	4.17142e+55	MCM2,MCM3,MCM4,MCM5,MCM6,MCM7,RFC3,SSBP1,TIMELESS,DBF4,FBXO5,GMNN,CDT1	13/50
3_Member	GO Biological Processes	GO:0000724	double-strand break repair via homologous recombination	-11.7379	-9.579	6.72224e+78	BRCA1,FEN1,H2AX,MCM2,MCM3,MCM4,MCM5,MCM6,MCM7,RAD21,CDC45,RAD51AP1,TOPBP1,UHRF1,GINS2,NUCKS1,GINS4,MMS22L	18/122
3_Member	GO Biological Processes	GO:0000725	recombinational repair	-11.3739	-9.235	6.72224e+78	BRCA1,FEN1,H2AX,MCM2,MCM3,MCM4,MCM5,MCM6,MCM7,RAD21,CDC45,RAD51AP1,TOPBP1,UHRF1,GINS2,NUCKS1,GINS4,MMS22L	18/128
3_Member	CORUM	CORUM:387	MCM complex	-10.7116	-8.604	4.17142e+23	MCM2,MCM3,MCM4,MCM5,MCM6,MCM7	45814
3_Member	GO Biological Processes	GO:0030174	regulation of DNA-templated DNA replication initiation	-10.2298	-8.148	4.17142e+33	MCM2,MCM3,MCM4,MCM5,MCM6,MCM7,GMNN,CDT1	45885
3_Member	Reactome Gene Sets	R-HSA-69052	Switching of origins to a post-replicative state	-10.1096	-8.031	8.9099e+54	CCNA2,CDC6,MCM2,MCM3,MCM4,MCM5,MCM6,ORC1,UBE2C,ORC6,UBE2S,GMNN,CDT1	13/68
3_Member	GO Biological Processes	GO:0033260	nuclear DNA replication	-9.69245	-7.635	2.23742e+37	FEN1,MCM2,MCM3,MCM4,MCM6,POLA1,CDC45,GMNN,CDT1	45926
3_Member	GO Biological Processes	GO:0032508	DNA duplex unwinding	-9.58266	-7.532	4.17142e+60	MCM2,MCM3,MCM4,MCM5,MCM6,MCM7,RFC3,SSBP1,CDC45,POLQ,ASCC3,GINS2,ERCC6L,GINS4	14/90
3_Member	GO Biological Processes	GO:0044786	cell cycle DNA replication	-9.52272	-7.478	2.23742e+37	FEN1,MCM2,MCM3,MCM4,MCM6,POLA1,CDC45,GMNN,CDT1	45927
3_Member	Reactome Gene Sets	R-HSA-69002	DNA Replication Pre-Initiation	-8.95632	-6.937	9.90301e+67	CDC6,H2AX,MCM2,MCM3,MCM4,MCM5,MCM6,ORC1,POLA1,POLE,CDC45,UBE2C,ORC6,UBE2S,GMNN,CDT1	16/137
3_Member	Reactome Gene Sets	R-HSA-68949	Orc1 removal from chromatin	-8.11472	-6.15	8.9099e+39	CCNA2,CDC6,MCM2,MCM3,MCM4,MCM5,MCM6,ORC1,ORC6,CDT1	18537
3_Member	GO Biological Processes	GO:1902969	mitotic DNA replication	-7.28279	-5.359	4.17142e+23	MCM2,MCM3,MCM4,MCM6,POLA1,CDC45	45822
3_Member	CORUM	CORUM:2792	MCM2-MCM4-MCM6-MCM7 complex	-7.1376	-5.234	4171417341754170	MCM2,MCM4,MCM6,MCM7	45751
3_Member	GO Biological Processes	GO:0006271	DNA strand elongation involved in DNA replication	-7.06704	-5.168	4.17242e+23	MCM3,MCM4,MCM7,POLA1,POLE,RFC3	45823
3_Member	Reactome Gene Sets	R-HSA-68867	Assembly of the pre-replicative complex	-6.91608	-5.021	9.90301e+55	CDC6,H2AX,MCM2,MCM3,MCM4,MCM5,MCM6,ORC1,UBE2C,ORC6,UBE2S,GMNN,CDT1	13/122
3_Member	GO Biological Processes	GO:1902292	cell cycle DNA replication initiation	-6.44435	-4.58	4171417241735420	MCM2,MCM3,MCM4,POLA1	45752
3_Member	GO Biological Processes	GO:1902315	nuclear cell cycle DNA replication initiation	-6.44435	-4.58	4171417241735420	MCM2,MCM3,MCM4,POLA1	45752
3_Member	GO Biological Processes	GO:1902975	mitotic DNA replication initiation	-6.44435	-4.58	4171417241735420	MCM2,MCM3,MCM4,POLA1	45752
3_Member	GO Biological Processes	GO:0022616	DNA strand elongation	-6.20848	-4.369	4.17242e+23	MCM3,MCM4,MCM7,POLA1,POLE,RFC3	45828
3_Member	CORUM	CORUM:1452	MCM2-MCM6-MCM7 complex	-5.35191	-3.586	417141754176	MCM2,MCM6,MCM7	45719
3_Member	CORUM	CORUM:2791	MCM4-MCM6-MCM7 complex	-5.35191	-3.586	417341754176	MCM4,MCM6,MCM7	45719
3_Member	GO Biological Processes	GO:0140588	chromatin looping	-4.63948	-2.957	4.17142e+52	MCM2,MCM3,MCM4,MCM5,MCM6,MCM7,RAD21,DDX39A,POLQ,ASCC3,ATAD2,ERCC6L	12/167
3_Member	CORUM	CORUM:5611	Emerin complex 24	-4.1942	-2.555	4001417141734170	LMNB1,MCM2,MCM4,MCM6	45761
3_Member	WikiPathways	WP4352	Ciliary landscape	-4.17055	-2.532	4.17142e+57	MCM2,MCM3,MCM4,MCM5,MCM6,MCM7,MSH2,RNGTT,CEP170,SMC4,MCM10,IQGAP3,NEK7	13/216
4_Summary	GO Biological Processes	GO:0090068	positive regulation of cell cycle process	-34.097	-31.231	3.327e+281	BIRC5,BUB1,CCNB1,CDK1,CDC6,CDC20,CDC25A,CDC25B,ECT2,FEN1,INCENP,MAD2L1,MDM2,RAD21,RANBP1,RRM1,RRM2,STIL,AURKA,AURKB,KIF23,KIF20B,ESPL1,DLGAP5,NCAPD2,KIF14,SMC4,NDC80,SMC2,SPAG5,RAD51AP1,PLK4,DBF4,UBE2C,CIT,NCAPD3,NCAPH,FBXO5,RACGAP1,DTL,NCAPG2,CDCA8,KNL1,NCAPG,FAM83D,CDCA5,SKA1,SKA3,CITED2,ADD3,BNIP3,CD47,LPAR1,GSN,NEK2,PFN2,PLAUR,SSBP1,CCP110,CDC42EP3,NCKAP1,SYNPO,BBC3,CCDC88A,NEK7	65/-
4_Member	GO Biological Processes	GO:0090068	positive regulation of cell cycle process	-34.097	-31.231	3.327e+208	BIRC5,BUB1,CCNB1,CDK1,CDC6,CDC20,CDC25A,CDC25B,ECT2,FEN1,INCENP,MAD2L1,MDM2,RAD21,RANBP1,RRM1,RRM2,STIL,AURKA,AURKB,KIF23,KIF20B,ESPL1,DLGAP5,NCAPD2,KIF14,SMC4,NDC80,SMC2,SPAG5,RAD51AP1,PLK4,DBF4,UBE2C,CIT,NCAPD3,NCAPH,FBXO5,RACGAP1,DTL,NCAPG2,CDCA8,KNL1,NCAPG,FAM83D,CDCA5,SKA1,SKA3	48/273
4_Member	GO Biological Processes	GO:0045787	positive regulation of cell cycle	-30.4167	-27.653	3.327e+213	BIRC5,BUB1,CCNB1,CDK1,CDC6,CDC20,CDC25A,CDC25B,ECT2,FEN1,INCENP,MAD2L1,MDM2,RAD21,RANBP1,RRM1,RRM2,STIL,AURKA,AURKB,KIF23,KIF20B,ESPL1,DLGAP5,NCAPD2,KIF14,SMC4,CITED2,NDC80,SMC2,SPAG5,RAD51AP1,PLK4,DBF4,UBE2C,CIT,NCAPD3,NCAPH,FBXO5,RACGAP1,DTL,NCAPG2,CDCA8,KNL1,NCAPG,FAM83D,CDCA5,SKA1,SKA3	49/343
4_Member	GO Biological Processes	GO:0010638	positive regulation of organelle organization	-14.9384	-12.663	1.20665e+170	ADD3,BNIP3,BUB1,CD47,CDK1,CDC20,LPAR1,FEN1,GSN,NEK2,PFN2,PLAUR,RAD21,STIL,SSBP1,AURKA,AURKB,ESPL1,CCP110,DLGAP5,NCAPD2,SMC4,SMC2,CDC42EP3,SPAG5,RAD51AP1,PLK4,NCKAP1,UBE2C,SYNPO,NCAPD3,NCAPH,BBC3,NCAPG2,CCDC88A,NCAPG,NEK7,SKA1,SKA3	39/499
4_Member	GO Biological Processes	GO:1901992	positive regulation of mitotic cell cycle phase transition	-14.0296	-11.776	3.32892e+77	BIRC5,CCNB1,CDK1,CDC6,CDC20,CDC25A,CDC25B,MDM2,RRM1,RRM2,STIL,ESPL1,DLGAP5,UBE2C,FBXO5,DTL,CDCA5,SKA1,SKA3	19/105
4_Member	GO Biological Processes	GO:1901989	positive regulation of cell cycle phase transition	-13.5964	-11.364	3.32892e+82	BIRC5,CCNB1,CDK1,CDC6,CDC20,CDC25A,CDC25B,MDM2,RRM1,RRM2,STIL,ESPL1,DLGAP5,UBE2C,FBXO5,DTL,FAM83D,CDCA5,SKA1,SKA3	20/126
4_Member	GO Biological Processes	GO:0045931	positive regulation of mitotic cell cycle	-12.9454	-10.732	3.32892e+81	BIRC5,CCNB1,CDK1,CDC6,CDC20,CDC25A,CDC25B,MDM2,RRM1,RRM2,STIL,AURKA,ESPL1,DLGAP5,UBE2C,FBXO5,DTL,CDCA5,SKA1,SKA3	20/136
4_Member	GO Biological Processes	GO:1901970	positive regulation of mitotic sister chromatid separation	-12.3931	-10.202	3.32991e+43	BIRC5,CDC20,INCENP,AURKB,ESPL1,DLGAP5,UBE2C,CDCA8,SKA1,SKA3	45951
4_Member	GO Biological Processes	GO:0045842	positive regulation of mitotic metaphase/anaphase transition	-6.68604	-4.798	9.9197e+27	CDC20,ESPL1,DLGAP5,UBE2C,SKA1,SKA3	45825
4_Member	GO Biological Processes	GO:1902101	positive regulation of metaphase/anaphase transition of cell cycle	-6.51603	-4.641	9.9197e+27	CDC20,ESPL1,DLGAP5,UBE2C,SKA1,SKA3	45826
4_Member	GO Biological Processes	GO:0051785	positive regulation of nuclear division	-5.099	-3.364	9.91679e+36	CDC20,AURKA,ESPL1,DLGAP5,RAD51AP1,UBE2C,SKA1,SKA3	22859
4_Member	GO Biological Processes	GO:0045840	positive regulation of mitotic nuclear division	-4.94902	-3.23	9.91679e+31	CDC20,AURKA,ESPL1,DLGAP5,UBE2C,SKA1,SKA3	17349
5_Summary	Reactome Gene Sets	R-HSA-194315	Signaling by Rho GTPases	-25.7614	-23.158	1.207e+259	ADD3,BUB1,BUB1B,CAV1,CDC20,CENPE,CENPF,DSP,ECT2,CENPI,GJA1,H2AX,KIF5B,LBR,LMNB1,MTR,MYH10,PFN2,PLK1,AURKB,SLC4A7,KNTC1,CCP110,SLK,ARHGAP11A,KIF14,TUBA1B,TUBB4B,NDC80,CDC42EP3,NCKAP1,YWHAQ,KIF2C,CIT,ZWINT,PLXND1,CYFIP2,RBMX,RACGAP1,ANLN,ERCC6L,CDCA8,CENPQ,CCDC88A,CENPN,SPC25,DSN1,KIF18A,NUF2,TUBA1C,ARHGAP18,IQGAP3,SPC24,SGO2,SKA1,AMIGO2,SKA2	57/-
5_Member	Reactome Gene Sets	R-HSA-194315	Signaling by Rho GTPases	-25.7614	-23.158	1.207e+259	ADD3,BUB1,BUB1B,CAV1,CDC20,CENPE,CENPF,DSP,ECT2,CENPI,GJA1,H2AX,KIF5B,LBR,LMNB1,MTR,MYH10,PFN2,PLK1,AURKB,SLC4A7,KNTC1,CCP110,SLK,ARHGAP11A,KIF14,TUBA1B,TUBB4B,NDC80,CDC42EP3,NCKAP1,YWHAQ,KIF2C,CIT,ZWINT,PLXND1,CYFIP2,RBMX,RACGAP1,ANLN,ERCC6L,CDCA8,CENPQ,CCDC88A,CENPN,SPC25,DSN1,KIF18A,NUF2,TUBA1C,ARHGAP18,IQGAP3,SPC24,SGO2,SKA1,AMIGO2,SKA2	57/605
5_Member	Reactome Gene Sets	R-HSA-9716542	Signaling by Rho GTPases, Miro GTPases and RHOBTB3	-25.2569	-22.68	1.207e+259	ADD3,BUB1,BUB1B,CAV1,CDC20,CENPE,CENPF,DSP,ECT2,CENPI,GJA1,H2AX,KIF5B,LBR,LMNB1,MTR,MYH10,PFN2,PLK1,AURKB,SLC4A7,KNTC1,CCP110,SLK,ARHGAP11A,KIF14,TUBA1B,TUBB4B,NDC80,CDC42EP3,NCKAP1,YWHAQ,KIF2C,CIT,ZWINT,PLXND1,CYFIP2,RBMX,RACGAP1,ANLN,ERCC6L,CDCA8,CENPQ,CCDC88A,CENPN,SPC25,DSN1,KIF18A,NUF2,TUBA1C,ARHGAP18,IQGAP3,SPC24,SGO2,SKA1,AMIGO2,SKA2	57/619
5_Member	Reactome Gene Sets	R-HSA-9012999	RHO GTPase cycle	-8.84232	-6.837	1.20857e+116	ADD3,CAV1,DSP,ECT2,GJA1,LBR,LMNB1,MTR,SLC4A7,CCP110,SLK,ARHGAP11A,KIF14,TUBA1B,CDC42EP3,NCKAP1,CIT,PLXND1,CYFIP2,RBMX,RACGAP1,ANLN,CCDC88A,ARHGAP18,IQGAP3,AMIGO2	26/382
6_Summary	GO Biological Processes	GO:0051321	meiotic cell cycle	-25.2529	-22.68	9.91994e+185	CDC20,CDC25B,CKS2,FANCA,FANCD2,MSH6,H2AX,INCENP,NEK2,PLK1,RAD21,AURKA,TOP2A,TTK,SMC1A,PKMYT1,CCNB2,EXO1,TRIP13,ESPL1,NCAPD2,SMC4,NDC80,SMC2,RAD51AP1,ZWINT,NCAPD3,NCAPH,SUN2,FBXO5,NDC1,KNL1,KIF18A,NUF2,SGO2,SKA1,SKA3,ASPM,SKA2,PTX3,PANX1	41/-
6_Member	GO Biological Processes	GO:0051321	meiotic cell cycle	-25.2529	-22.68	9.91994e+176	CDC20,CDC25B,CKS2,FANCA,FANCD2,MSH6,H2AX,INCENP,NEK2,PLK1,RAD21,AURKA,TOP2A,TTK,SMC1A,PKMYT1,CCNB2,EXO1,TRIP13,ESPL1,NCAPD2,SMC4,NDC80,SMC2,RAD51AP1,ZWINT,NCAPD3,NCAPH,SUN2,FBXO5,NDC1,KNL1,KIF18A,NUF2,SGO2,SKA1,SKA3,ASPM,SKA2	39/257
6_Member	GO Biological Processes	GO:1903046	meiotic cell cycle process	-20.8468	-18.412	9.91994e+140	CDC20,CDC25B,CKS2,FANCA,FANCD2,MSH6,INCENP,PLK1,RAD21,AURKA,TOP2A,TTK,CCNB2,TRIP13,ESPL1,NCAPD2,SMC4,NDC80,SMC2,ZWINT,NCAPD3,NCAPH,FBXO5,NDC1,KNL1,KIF18A,NUF2,SKA1,SKA3,ASPM,SKA2	31/194
6_Member	GO Biological Processes	GO:0140013	meiotic nuclear division	-17.9516	-15.599	9.94116e+124	CDC25B,CKS2,FANCA,FANCD2,INCENP,PLK1,RAD21,AURKA,TOP2A,TTK,CCNB2,TRIP13,ESPL1,SMC4,NDC80,SMC2,ZWINT,NCAPH,FBXO5,NDC1,KNL1,KIF18A,NUF2,SKA1,SKA3,ASPM,SKA2	27/173
6_Member	GO Biological Processes	GO:0045132	meiotic chromosome segregation	-16.3803	-14.058	2.17753e+96	FANCD2,PLK1,AURKA,TTK,CCNB2,TRIP13,ESPL1,SMC4,NDC80,SMC2,ZWINT,NCAPH,FBXO5,NDC1,KNL1,NUF2,SKA1,SKA3,ASPM,SKA2	20/92
6_Member	GO Biological Processes	GO:0007143	female meiotic nuclear division	-13.1843	-10.962	9.94535e+59	CDC25B,PLK1,AURKA,TOP2A,TTK,CCNB2,TRIP13,NDC80,NCAPH,FBXO5,SKA1,SKA3,SKA2	13/41
6_Member	GO Biological Processes	GO:0090306	meiotic spindle assembly	-10.5246	-8.424	6.79091e+41	AURKA,CCNB2,NDC80,FBXO5,SKA1,SKA3,ASPM,SKA2	45884
6_Member	GO Biological Processes	GO:0000212	meiotic spindle organization	-10.4651	-8.37	6.79091e+45	AURKA,CCNB2,ESPL1,NDC80,FBXO5,SKA1,SKA3,ASPM,SKA2	45922
6_Member	GO Biological Processes	GO:0061982	meiosis I cell cycle process	-10.3716	-8.281	9.91994e+70	CDC20,CDC25B,CKS2,FANCD2,MSH6,PLK1,RAD21,AURKA,TOP2A,CCNB2,TRIP13,ESPL1,NDC80,ZWINT,FBXO5,NDC1,KNL1	17/128
6_Member	GO Biological Processes	GO:0007056	spindle assembly involved in female meiosis	-9.6322	-7.577	6.79091e+35	AURKA,CCNB2,NDC80,FBXO5,SKA1,SKA3,SKA2	45850
6_Member	GO Biological Processes	GO:0007127	meiosis I	-8.60038	-6.603	9.94116e+63	CDC25B,CKS2,FANCD2,PLK1,RAD21,AURKA,TOP2A,CCNB2,TRIP13,ESPL1,NDC80,ZWINT,FBXO5,NDC1,KNL1	15/125
6_Member	GO Biological Processes	GO:0007292	female gamete generation	-7.70337	-5.756	9.94535e+74	CDC25B,PLK1,PTX3,AURKA,TOP2A,TTK,CCNB2,TRIP13,NDC80,NCAPH,PANX1,FBXO5,SKA1,SKA3,ASPM,SKA2	16/167
6_Member	GO Biological Processes	GO:0007144	female meiosis I	-7.51974	-5.585	9.94679e+24	CDC25B,AURKA,CCNB2,TRIP13,NDC80,FBXO5	45821
6_Member	GO Biological Processes	GO:0007057	spindle assembly involved in female meiosis I	-7.1376	-5.234	6.79091e+17	AURKA,CCNB2,NDC80,FBXO5	45751
6_Member	GO Biological Processes	GO:0045143	homologous chromosome segregation	-3.9731	-2.366	2.17753e+30	FANCD2,PLK1,TRIP13,ESPL1,ZWINT,NDC1,KNL1	24289
7_Summary	Canonical Pathways	M14	PID AURORA B PATHWAY	-25.114	-22.549	3.32699e+248	BIRC5,BUB1,INCENP,STMN1,PPP1CC,RASA1,AURKA,AURKB,KIF23,NCAPD2,SMC4,KIF20A,NDC80,SMC2,KIF2C,NCAPH,CBX5,RACGAP1,CDCA8,NCAPG,ECT2,MYH10,PLK1,ESPL1,CIT,KIF4A,CKAP2,ANLN,CEP55,IQGAP3,CCNB1,CDK1,NEK2,KNTC1,SPAG5,KNSTRN,SEPTIN11,MAD2L1,ZWINT,KNL1,SKA1,SKA3,CDC6,CDC25B,PLK3,KIF20B,CCP110,KIF14,BRCA1,WDR76,FGF2,VEGFA,LBH,KIF18B,ASPM,KIF11	56/-
7_Member	Canonical Pathways	M14	PID AURORA B PATHWAY	-25.114	-22.549	3.32699e+87	BIRC5,BUB1,INCENP,STMN1,PPP1CC,RASA1,AURKA,AURKB,KIF23,NCAPD2,SMC4,KIF20A,NDC80,SMC2,KIF2C,NCAPH,CBX5,RACGAP1,CDCA8,NCAPG	20/39
7_Member	GO Biological Processes	GO:0000281	mitotic cytokinesis	-15.4346	-13.14	3.32189e+84	BIRC5,ECT2,INCENP,STMN1,MYH10,PLK1,RASA1,AURKB,KIF23,ESPL1,KIF20A,CIT,KIF4A,CKAP2,RACGAP1,ANLN,CDCA8,CEP55,IQGAP3	19/89
7_Member	GO Biological Processes	GO:0051988	regulation of attachment of spindle microtubules to kinetochore	-15.3947	-13.104	3.32892e+48	BIRC5,CCNB1,CDK1,ECT2,INCENP,NEK2,AURKB,KNTC1,SPAG5,RACGAP1,CDCA8,KNSTRN	46014
7_Member	GO Biological Processes	GO:0061640	cytoskeleton-dependent cytokinesis	-14.2373	-11.973	3.32189e+89	BIRC5,ECT2,INCENP,STMN1,MYH10,PLK1,RASA1,AURKB,KIF23,ESPL1,KIF20A,CIT,KIF4A,CKAP2,RACGAP1,ANLN,CDCA8,CEP55,SEPTIN11,IQGAP3	20/117
7_Member	GO Biological Processes	GO:0000910	cytokinesis	-14.0899	-11.829	3.32189e+89	BIRC5,ECT2,INCENP,STMN1,MYH10,PLK1,RASA1,AURKB,KIF23,ESPL1,KIF20A,CIT,KIF4A,CKAP2,RACGAP1,ANLN,CDCA8,CEP55,SEPTIN11,IQGAP3	20/119
7_Member	GO Biological Processes	GO:0090231	regulation of spindle checkpoint	-13.103	-10.884	3.32891e+49	BIRC5,CCNB1,INCENP,MAD2L1,AURKB,NDC80,ZWINT,CDCA8,KNL1,SKA1,SKA3	45986
7_Member	GO Biological Processes	GO:0032465	regulation of cytokinesis	-12.5346	-10.334	3.32991e+68	BIRC5,CDC6,CDC25B,PLK3,ECT2,INCENP,PLK1,AURKA,AURKB,KIF23,KIF20B,CCP110,KIF14,KIF20A,CIT,RACGAP1,CDCA8	17/95
7_Member	GO Biological Processes	GO:1901976	regulation of cell cycle checkpoint	-12.0632	-9.887	3.32673e+57	BIRC5,BRCA1,CCNB1,INCENP,MAD2L1,AURKB,NDC80,ZWINT,CDCA8,KNL1,WDR76,SKA1,SKA3	13/49
7_Member	GO Biological Processes	GO:0051302	regulation of cell division	-12.0049	-9.835	3.32991e+93	BIRC5,CDC6,CDC25B,PLK3,ECT2,FGF2,INCENP,PLK1,AURKA,VEGFA,AURKB,KIF23,KIF20B,CCP110,KIF14,KIF20A,CIT,RACGAP1,CDCA8,LBH,KIF18B,ASPM	22/190
7_Member	GO Biological Processes	GO:0090266	regulation of mitotic cell cycle spindle assembly checkpoint	-11.6672	-9.52	3.32891e+44	BIRC5,CCNB1,INCENP,MAD2L1,AURKB,NDC80,CDCA8,KNL1,SKA1,SKA3	45954
7_Member	GO Biological Processes	GO:1903504	regulation of mitotic spindle checkpoint	-11.6672	-9.52	3.32891e+44	BIRC5,CCNB1,INCENP,MAD2L1,AURKB,NDC80,CDCA8,KNL1,SKA1,SKA3	45954
7_Member	GO Biological Processes	GO:0051231	spindle elongation	-11.2109	-9.081	3.32362e+33	BIRC5,INCENP,KIF11,AURKB,KIF23,KIF4A,RACGAP1,CDCA8	45882
7_Member	GO Biological Processes	GO:0032467	positive regulation of cytokinesis	-10.5067	-8.409	3.32991e+47	BIRC5,CDC6,CDC25B,ECT2,INCENP,AURKB,KIF23,KIF20B,KIF14,CIT,RACGAP1,CDCA8	18963
7_Member	GO Biological Processes	GO:0051781	positive regulation of cell division	-10.0546	-7.978	3.32991e+60	BIRC5,CDC6,CDC25B,ECT2,FGF2,INCENP,VEGFA,AURKB,KIF23,KIF20B,KIF14,CIT,RACGAP1,CDCA8,LBH	15/99
7_Member	GO Biological Processes	GO:0000022	mitotic spindle elongation	-10.0062	-7.935	3.32362e+29	BIRC5,INCENP,AURKB,KIF23,KIF4A,RACGAP1,CDCA8	45849
7_Member	GO Biological Processes	GO:0051256	mitotic spindle midzone assembly	-10.0062	-7.935	3.32362e+29	BIRC5,INCENP,AURKB,KIF23,KIF4A,RACGAP1,CDCA8	45849
7_Member	GO Biological Processes	GO:0090232	positive regulation of spindle checkpoint	-9.30262	-7.271	3.32362e+29	BIRC5,INCENP,MAD2L1,AURKB,NDC80,CDCA8,KNL1	45851
7_Member	GO Biological Processes	GO:0051255	spindle midzone assembly	-9.00781	-6.985	3.32362e+29	BIRC5,INCENP,AURKB,KIF23,KIF4A,RACGAP1,CDCA8	45852
7_Member	GO Biological Processes	GO:1901978	positive regulation of cell cycle checkpoint	-7.87207	-5.913	3.32362e+29	BIRC5,INCENP,MAD2L1,AURKB,NDC80,CDCA8,KNL1	45857
7_Member	GO Biological Processes	GO:0090267	positive regulation of mitotic cell cycle spindle assembly checkpoint	-7.78249	-5.834	3.32362e+24	BIRC5,INCENP,MAD2L1,AURKB,NDC80,CDCA8	45820
7_Member	GO Biological Processes	GO:1903490	positive regulation of mitotic cytokinesis	-7.51974	-5.585	3.32189e+23	BIRC5,ECT2,INCENP,AURKB,KIF20B,CDCA8	45821
7_Member	CORUM	CORUM:1118	Chromosomal passenger complex CPC (INCENP, CDCA8, BIRC5, AURKB)	-7.1376	-5.234	3323619921255140	BIRC5,INCENP,AURKB,CDCA8	45751
7_Member	CORUM	CORUM:1119	Chromosomal passenger complex CPC (INCENP, CDCA8, BIRC5, AURKB)	-7.1376	-5.234	3323619921255140	BIRC5,INCENP,AURKB,CDCA8	45751
7_Member	GO Biological Processes	GO:0090235	regulation of metaphase plate congression	-7.06704	-5.168	3.32983e+23	BIRC5,CDK1,INCENP,AURKB,SPAG5,CDCA8	45823
7_Member	GO Biological Processes	GO:1902412	regulation of mitotic cytokinesis	-6.869	-4.977	3.32189e+23	BIRC5,ECT2,INCENP,AURKB,KIF20B,CDCA8	45824
7_Member	GO Biological Processes	GO:1902423	regulation of attachment of mitotic spindle microtubules to kinetochore	-6.55245	-4.676	3.32983e+18	BIRC5,CDK1,INCENP,AURKB,CDCA8	45787
7_Member	GO Biological Processes	GO:0051987	positive regulation of attachment of spindle microtubules to kinetochore	-6.29515	-4.447	3.32891e+18	BIRC5,CCNB1,INCENP,AURKB,CDCA8	45788
7_Member	CORUM	CORUM:1120	Chromosomal passenger complex CPC (INCENP, CDCA8, BIRC5)	-5.35191	-3.586	332361955143	BIRC5,INCENP,CDCA8	45719
7_Member	CORUM	CORUM:2579	Chromosomal passenger complex CPC (INCENP, BIRC5, AURKB)	-5.35191	-3.586	33236199212	BIRC5,INCENP,AURKB	45719
7_Member	CORUM	CORUM:2582	Chromosomal passenger complex CPC (CDCA8, AURKB, BIRC5)	-5.35191	-3.586	332921255143	BIRC5,AURKB,CDCA8	45719
7_Member	CORUM	CORUM:6184	AuroraB-AuroraC-INCENP complex	-5.35191	-3.586	361967909212	INCENP,AURKA,AURKB	45719
7_Member	GO Biological Processes	GO:1902425	positive regulation of attachment of mitotic spindle microtubules to kinetochore	-5.31535	-3.562	3323619921255140	BIRC5,INCENP,AURKB,CDCA8	45755
7_Member	CORUM	CORUM:1087	BIRC5-AURKB-INCENP-EVI5 complex	-4.75522	-3.059	33236199212	BIRC5,INCENP,AURKB	45720
8_Summary	GO Biological Processes	GO:0044770	cell cycle phase transition	-23.5551	-21.038	3.32587e+208	BIRC5,BCAT1,BUB1B,CCNA2,CCNB1,CCNF,CDK1,CDC20,CDC25A,CDC25B,CDK6,CDKN1A,CDKN3,CKS1B,CKS2,PLK3,PLK1,POLE,SKP2,AURKA,TIMELESS,PKMYT1,CCNB2,AURKB,MELK,NDC80,TACC3,DBF4,UBE2C,UBE2S,IQGAP3,CENPF,NEK2,BUB1,MDM2,PRKACB,BBC3,AEN,RRM2,THBS1,GTSE1,ZMAT3,CDKN2B,E2F1,CXCL8,MYBL2,PPP1CC,RBL1,GSN,RBPJ,RANBP1,YWHAQ	52/-
8_Member	GO Biological Processes	GO:0044770	cell cycle phase transition	-23.5551	-21.038	3.32587e+120	BIRC5,BCAT1,BUB1B,CCNA2,CCNB1,CCNF,CDK1,CDC20,CDC25A,CDC25B,CDK6,CDKN1A,CDKN3,CKS1B,CKS2,PLK3,PLK1,POLE,SKP2,AURKA,TIMELESS,PKMYT1,CCNB2,AURKB,MELK,NDC80,TACC3,DBF4,UBE2C,UBE2S,IQGAP3	31/159
8_Member	GO Biological Processes	GO:0044772	mitotic cell cycle phase transition	-19.9471	-17.538	3.32587e+104	BIRC5,BCAT1,BUB1B,CCNA2,CCNB1,CCNF,CDK1,CDC25A,CDC25B,CDK6,CDKN1A,CDKN3,CKS1B,CKS2,PLK3,PLK1,POLE,SKP2,AURKA,PKMYT1,CCNB2,MELK,TACC3,DBF4,UBE2C,UBE2S,IQGAP3	27/146
8_Member	GO Biological Processes	GO:0044839	cell cycle G2/M phase transition	-14.0242	-11.774	3.32891e+54	BIRC5,CCNA2,CCNB1,CDK1,CDC25A,CDC25B,PLK3,PLK1,SKP2,AURKA,PKMYT1,CCNB2,AURKB,MELK,NDC80	15/55
8_Member	Canonical Pathways	M176	PID FOXM1 PATHWAY	-11.8889	-9.725	3.32891e+42	BIRC5,CCNA2,CCNB1,CDK1,CDC25B,CENPF,CKS1B,NEK2,PLK1,SKP2,CCNB2,AURKB	14946
8_Member	GO Biological Processes	GO:0000082	G1/S transition of mitotic cell cycle	-11.4415	-9.3	5.86891e+56	BCAT1,CCNA2,CCNB1,CCNF,CDK1,CDC25A,CDK6,CDKN1A,CDKN3,PLK3,POLE,SKP2,CCNB2,DBF4,IQGAP3	15/80
8_Member	GO Biological Processes	GO:0044843	cell cycle G1/S phase transition	-11.2779	-9.141	5.86891e+56	BCAT1,CCNA2,CCNB1,CCNF,CDK1,CDC25A,CDK6,CDKN1A,CDKN3,PLK3,POLE,SKP2,CCNB2,DBF4,IQGAP3	15/82
8_Member	GO Biological Processes	GO:0000086	G2/M transition of mitotic cell cycle	-10.6167	-8.514	3.32891e+41	BIRC5,CCNA2,CCNB1,CDK1,CDC25A,CDC25B,PLK3,PLK1,SKP2,AURKA,PKMYT1,MELK	18598
8_Member	Canonical Pathways	M19	PID P73PATHWAY	-8.17937	-6.203	6.99891e+45	BUB1,CCNA2,CCNB1,CDK1,CDK6,CDKN1A,PLK3,MDM2,PLK1,PRKACB,BBC3,AEN	29190
8_Member	KEGG Pathway	hsa04115	p53 signaling pathway	-7.38436	-5.456	8.91983e+44	CCNB1,CDK1,CDK6,CDKN1A,MDM2,RRM2,THBS1,CCNB2,BBC3,GTSE1,ZMAT3	27699
8_Member	KEGG Pathway	hsa04218	Cellular senescence	-6.43213	-4.571	8.90892e+51	CCNA2,CCNB1,CDK1,CDC25A,CDK6,CDKN1A,CDKN2B,E2F1,CXCL8,MDM2,MYBL2,PPP1CC,RBL1,CCNB2	14/157
8_Member	KEGG Pathway	hsa05203	Viral carcinogenesis	-5.05961	-3.338	8.90984e+53	CCNA2,CDK1,CDC20,CDK6,CDKN1A,CDKN2B,GSN,RBPJ,MDM2,PRKACB,RANBP1,RBL1,SKP2,YWHAQ	14/205
9_Summary	GO Biological Processes	GO:1905820	positive regulation of chromosome separation	-21.7768	-19.291	3.32991e+147	BIRC5,CDC20,INCENP,AURKB,ESPL1,DLGAP5,NCAPD2,SMC4,SMC2,UBE2C,NCAPD3,NCAPH,NCAPG2,CDCA8,NCAPG,SKA1,SKA3,CCNB1,CDK1,CDC6,CCNB2,BUB1,FEN1,NEK2,RAD21,NEK7,PLK1,TOP2A,CDCA5,FANCD2,TRIP13,NDC1,H2AX,KIF4A	34/-
9_Member	GO Biological Processes	GO:1905820	positive regulation of chromosome separation	-21.7768	-19.291	3.32991e+77	BIRC5,CDC20,INCENP,AURKB,ESPL1,DLGAP5,NCAPD2,SMC4,SMC2,UBE2C,NCAPD3,NCAPH,NCAPG2,CDCA8,NCAPG,SKA1,SKA3	17/32
9_Member	GO Biological Processes	GO:0051984	positive regulation of chromosome segregation	-20.563	-18.144	3.32892e+70	BIRC5,CCNB1,CDK1,CDC6,INCENP,AURKB,NCAPD2,SMC4,SMC2,NCAPD3,NCAPH,NCAPG2,CDCA8,NCAPG,SKA1,SKA3	16/30
9_Member	Reactome Gene Sets	R-HSA-2514853	Condensation of Prometaphase Chromosomes	-12.0904	-9.911	8.91984e+33	CCNB1,CDK1,CCNB2,NCAPD2,SMC4,SMC2,NCAPH,NCAPG	45880
9_Member	GO Biological Processes	GO:1905821	positive regulation of chromosome condensation	-11.603	-9.458	9.9181e+33	NCAPD2,SMC4,SMC2,NCAPD3,NCAPH,NCAPG2,NCAPG	45846
9_Member	GO Biological Processes	GO:2001252	positive regulation of chromosome organization	-10.7222	-8.612	6.99983e+73	BUB1,CDK1,FEN1,NEK2,RAD21,AURKB,NCAPD2,SMC4,SMC2,NCAPD3,NCAPH,NCAPG2,NCAPG,NEK7,SKA1,SKA3	16/105
9_Member	GO Biological Processes	GO:0030261	chromosome condensation	-10.2303	-8.148	9.83535e+50	CDK1,PLK1,TOP2A,NCAPD2,SMC4,SMC2,NCAPD3,NCAPH,NCAPG2,NCAPG,CDCA5	15646
9_Member	GO Biological Processes	GO:0007076	mitotic chromosome condensation	-9.95993	-7.891	5.34799e+38	PLK1,NCAPD2,SMC4,SMC2,NCAPD3,NCAPH,NCAPG,CDCA5	45886
9_Member	GO Biological Processes	GO:0060623	regulation of chromosome condensation	-9.30262	-7.271	9.9181e+33	NCAPD2,SMC4,SMC2,NCAPD3,NCAPH,NCAPG2,NCAPG	45851
9_Member	CORUM	CORUM:10	Condensin I complex	-8.92415	-6.911	9.9181e+23	NCAPD2,SMC4,SMC2,NCAPH,NCAPG	45782
9_Member	CORUM	CORUM:157	Condensin I complex	-8.92415	-6.911	9.9181e+23	NCAPD2,SMC4,SMC2,NCAPH,NCAPG	45782
9_Member	CORUM	CORUM:167	Condensin I complex	-8.92415	-6.911	9.9181e+23	NCAPD2,SMC4,SMC2,NCAPH,NCAPG	45782
9_Member	GO Biological Processes	GO:0010032	meiotic chromosome condensation	-8.15194	-6.182	9.9181e+23	NCAPD2,SMC4,SMC2,NCAPD3,NCAPH	45783
9_Member	CORUM	CORUM:159	Condensin I-PARP-1-XRCC1 complex	-7.61382	-5.67	9.9181e+23	NCAPD2,SMC4,SMC2,NCAPH,NCAPG	45784
9_Member	CORUM	CORUM:160	Condensin II	-6.44435	-4.58	1.00511e+19	SMC4,SMC2,NCAPD3,NCAPG2	45752
9_Member	GO Biological Processes	GO:0070192	chromosome organization involved in meiotic cell cycle	-4.94374	-3.227	2.17793e+36	FANCD2,TRIP13,NCAPD2,SMC4,SMC2,NCAPD3,NCAPH,NDC1	23955
9_Member	Reactome Gene Sets	R-HSA-2299718	Condensation of Prophase Chromosomes	-4.65735	-2.973	8.91983e+33	CCNB1,CDK1,H2AX,PLK1,SMC4,SMC2,NCAPD3,NCAPG2	26146
9_Member	CORUM	CORUM:49	DNMT3B complex	-3.82929	-2.251	100511059224137	SMC4,SMC2,KIF4A	45723
10_Summary	Canonical Pathways	M129	PID PLK1 PATHWAY	-21.5869	-19.107	6.99702e+132	BUB1,BUB1B,CCNB1,CDK1,CDC20,CDC25B,CENPE,ECT2,INCENP,PLK1,AURKA,KIF20A,NDC80,TPX2,FBXO5,ERCC6L,CLSPN,CENPU,SPC24,ADCY3,MAD2L1,PPP1CC,PRKACB,SMC1A,PKMYT1,CCNB2,ESPL1,SLK,YWHAQ,CCNA2,CDC25A,GNAI2,KIF22	33/-
10_Member	Canonical Pathways	M129	PID PLK1 PATHWAY	-21.5869	-19.107	6.99702e+78	BUB1,BUB1B,CCNB1,CDK1,CDC20,CDC25B,CENPE,ECT2,INCENP,PLK1,AURKA,KIF20A,NDC80,TPX2,FBXO5,ERCC6L,CLSPN,CENPU,SPC24	19/46
10_Member	KEGG Pathway	hsa04114	Oocyte meiosis	-9.79529	-7.731	1.097e+64	ADCY3,BUB1,CCNB1,CDK1,CDC20,MAD2L1,PLK1,PPP1CC,PRKACB,AURKA,SMC1A,PKMYT1,CCNB2,ESPL1,SLK,YWHAQ,FBXO5	17/139
10_Member	KEGG Pathway	hsa04914	Progesterone-mediated oocyte maturation	-9.33286	-7.297	1.097e+52	ADCY3,BUB1,CCNA2,CCNB1,CDK1,CDC25A,CDC25B,GNAI2,KIF22,MAD2L1,PLK1,PRKACB,AURKA,PKMYT1,CCNB2	15/111
11_Summary	WikiPathways	WP2004	miR targeted genes in lymphocytes	-21.5735	-19.099	4.88559e+214	ATP2A2,AXL,CBFB,CDK6,CDKN1A,E2F1,FGF2,GFPT1,GNAI2,GPD2,MYO10,NARS1,PLK1,PTMA,PTPRJ,RAB27B,SYPL1,USP1,SMC1A,SUCLG2,AURKB,TRIP13,SLC4A7,CHAF1A,PPIF,PDLIM5,YWHAQ,PLXND1,BACE1,SH3BP4,PANX1,UBE2S,UHRF1,PSAT1,GALNT7,SPCS3,GNPNAT1,SLC25A22,FAR1,LMNB2,IQGAP3,BRI3BP,POGLUT3,AMIGO2,GJA1,PODXL,THBS1,SLC7A11	48/-
11_Member	WikiPathways	WP2004	miR targeted genes in lymphocytes	-21.5735	-19.099	4.88559e+197	ATP2A2,AXL,CBFB,CDK6,CDKN1A,E2F1,FGF2,GFPT1,GNAI2,GPD2,MYO10,NARS1,PLK1,PTMA,PTPRJ,RAB27B,SYPL1,USP1,SMC1A,SUCLG2,AURKB,TRIP13,SLC4A7,CHAF1A,PPIF,PDLIM5,YWHAQ,PLXND1,BACE1,SH3BP4,PANX1,UBE2S,UHRF1,PSAT1,GALNT7,SPCS3,GNPNAT1,SLC25A22,FAR1,LMNB2,IQGAP3,BRI3BP,POGLUT3,AMIGO2	44/424
11_Member	WikiPathways	WP2005	miR targeted genes in muscle cell	-17.4703	-15.127	4.88559e+158	ATP2A2,AXL,CBFB,CDK6,CDKN1A,E2F1,FGF2,GFPT1,GJA1,GPD2,MYO10,PLK1,PODXL,PTMA,PTPRJ,RAB27B,SYPL1,THBS1,USP1,SLC4A7,PPIF,PDLIM5,YWHAQ,BACE1,SLC7A11,SH3BP4,PANX1,UHRF1,PSAT1,GALNT7,SPCS3,GNPNAT1,FAR1,LMNB2,POGLUT3,AMIGO2	36/353
11_Member	WikiPathways	WP2006	miR targeted genes in squamous cell	-7.50271	-5.571	4.88559e+58	ATP2A2,AXL,CBFB,FGF2,GFPT1,GNAI2,PODXL,PTMA,THBS1,YWHAQ,SH3BP4,GALNT7,SPCS3,POGLUT3	14/129
11_Member	WikiPathways	WP2003	miR targeted genes in leukocytes	-5.06081	-3.339	4.88102e+48	ATP2A2,CDK6,GNAI2,THBS1,USP1,PPIF,PDLIM5,YWHAQ,PLXND1,SLC7A11,LMNB2	11/127
12_Summary	Canonical Pathways	M40	PID E2F PATHWAY	-19.9354	-17.532	6.72841e+97	BRCA1,CASP7,CCNA2,CDK1,CDC6,CDC25A,CDKN1A,CDKN2C,DHFR,E2F1,MCM3,MYBL2,ORC1,PLAU,POLA1,RANBP1,RBL1,RRM1,RRM2,TOPBP1,CBX5,CDC45,FBXO5,CDT1,TOP2A	25/-
12_Member	Canonical Pathways	M40	PID E2F PATHWAY	-19.9354	-17.532	6.72841e+79	BRCA1,CASP7,CCNA2,CDK1,CDC6,CDC25A,CDKN1A,CDKN2C,DHFR,E2F1,MCM3,MYBL2,ORC1,PLAU,POLA1,RANBP1,RBL1,RRM1,RRM2,TOPBP1,CBX5	21/73
12_Member	Reactome Gene Sets	R-HSA-69205	G1/S-Specific Transcription	-12.8706	-10.664	9.8399e+43	CDK1,CDC6,DHFR,E2F1,ORC1,POLA1,RBL1,RRM2,CDC45,FBXO5,CDT1	45987
12_Member	Reactome Gene Sets	R-HSA-1538133	G0 and Early G1	-8.69301	-6.692	8.90984e+27	CCNA2,CDK1,CDC6,CDC25A,E2F1,MYBL2,RBL1,TOP2A	45892
12_Member	Reactome Gene Sets	R-HSA-1362300	Transcription of E2F targets under negative control by p107 (RBL1) and p130 (RBL2) in complex with HDAC1	-5.67611	-3.864	8.90983e+17	CCNA2,CDK1,E2F1,MYBL2,RBL1	45791
12_Member	CORUM	CORUM:5144	E2F1-p107-cyclinA complex	-5.35191	-3.586	89018695933	CCNA2,E2F1,RBL1	45719
12_Member	Reactome Gene Sets	R-HSA-1362277	Transcription of E2F targets under negative control by DREAM complex	-5.34914	-3.586	9.90993e+17	CDC6,CDC25A,E2F1,RBL1,TOP2A	45793
13_Summary	GO Biological Processes	GO:0051052	regulation of DNA metabolic process	-17.0267	-14.7	6.72891e+223	BRCA1,CCNA2,CDK1,CDC6,CDC25A,CDKN1A,FGF2,MSH6,H2AX,HMGB1,KCNK2,KPNA2,MCM2,MCM3,MCM4,MCM5,MCM6,MCM7,MSH2,NEK2,PLK1,RFC3,SKP2,SMARCA4,SSBP1,USP1,VEGFA,NSD2,DEK,TIMELESS,AURKB,RAD51AP1,POLQ,DBF4,FBXO5,GMNN,TIGAR,NUCKS1,NIBAN2,CDT1,NEK7,ESCO2,PTTG1IP,CAV1,DHFR,MDM2,TMBIM6,HYOU1,SLC7A11,BBC3,IER5,PBK,WDR76	53/-
13_Member	GO Biological Processes	GO:0051052	regulation of DNA metabolic process	-17.0267	-14.7	6.72891e+175	BRCA1,CCNA2,CDK1,CDC6,CDC25A,CDKN1A,FGF2,MSH6,H2AX,HMGB1,KCNK2,KPNA2,MCM2,MCM3,MCM4,MCM5,MCM6,MCM7,MSH2,NEK2,PLK1,RFC3,SKP2,SMARCA4,SSBP1,USP1,VEGFA,NSD2,DEK,TIMELESS,AURKB,RAD51AP1,POLQ,DBF4,FBXO5,GMNN,TIGAR,NUCKS1,NIBAN2,CDT1,NEK7,ESCO2	42/505
13_Member	GO Biological Processes	GO:0051054	positive regulation of DNA metabolic process	-9.72735	-7.665	6.72891e+97	BRCA1,CCNA2,CDK1,CDC25A,CDKN1A,FGF2,H2AX,HMGB1,MSH2,NEK2,RFC3,SKP2,SMARCA4,SSBP1,USP1,VEGFA,NSD2,TIMELESS,AURKB,RAD51AP1,DBF4,TIGAR,CDT1,NEK7	24/296
13_Member	GO Biological Processes	GO:0080135	regulation of cellular response to stress	-5.43276	-3.643	6.72755e+105	BRCA1,PTTG1IP,CAV1,DHFR,H2AX,HMGB1,KCNK2,MDM2,PLK1,SKP2,SMARCA4,TMBIM6,USP1,NSD2,DEK,TIMELESS,HYOU1,RAD51AP1,POLQ,SLC7A11,BBC3,IER5,PBK,TIGAR,WDR76	25/535
13_Member	GO Biological Processes	GO:0006282	regulation of DNA repair	-3.953	-2.347	6.72301e+53	BRCA1,H2AX,HMGB1,PLK1,SKP2,SMARCA4,USP1,NSD2,DEK,TIMELESS,RAD51AP1,POLQ,TIGAR	13/227
13_Member	GO Biological Processes	GO:0045739	positive regulation of DNA repair	-3.31045	-1.806	6.72301e+36	BRCA1,H2AX,HMGB1,SKP2,SMARCA4,USP1,TIMELESS,RAD51AP1,TIGAR	9/138
13_Member	GO Biological Processes	GO:0000018	regulation of DNA recombination	-3.22045	-1.727	2.95638e+37	MSH6,KPNA2,MSH2,PLK1,SKP2,NSD2,TIMELESS,RAD51AP1,POLQ	9/142
13_Member	GO Biological Processes	GO:2000779	regulation of double-strand break repair	-2.54248	-1.163	5.34765e+33	PLK1,SKP2,SMARCA4,NSD2,DEK,TIMELESS,RAD51AP1,POLQ	8/145
13_Member	GO Biological Processes	GO:0045911	positive regulation of DNA recombination	-2.07383	-0.799	4.43665e+20	MSH2,SKP2,NSD2,TIMELESS,RAD51AP1	27881
14_Summary	GO Biological Processes	GO:0010389	regulation of G2/M transition of mitotic cell cycle	-16.0254	-13.711	6.72892e+157	BRCA1,CCNB1,CDK1,CDC6,CDC25A,CDC25B,CDK6,CDKN1A,CENPF,ORC1,PLK1,RAD21,RRM1,AURKA,PKMYT1,AURKB,KIF14,TOPBP1,FBXO5,DTL,CLSPN,E2F1,FANCA,FANCD2,FEN1,H2AX,MCM2,MDM2,MSH2,USP1,SMC1A,CDC45,EXO1,FANCI,PLK3,TIMELESS,RPS27L,GTSE1,CDT1	39/-
14_Member	GO Biological Processes	GO:0010389	regulation of G2/M transition of mitotic cell cycle	-16.0254	-13.711	6.72892e+81	BRCA1,CCNB1,CDK1,CDC6,CDC25A,CDC25B,CDK6,CDKN1A,CENPF,ORC1,PLK1,RAD21,RRM1,AURKA,PKMYT1,AURKB,KIF14,TOPBP1,FBXO5,DTL,CLSPN	21/109
14_Member	WikiPathways	WP4016	DNA IR damage and cellular response via ATR	-14.9839	-12.703	6.72983e+72	BRCA1,CDK1,E2F1,FANCA,FANCD2,FEN1,H2AX,MCM2,MDM2,MSH2,PLK1,USP1,SMC1A,CDC45,EXO1,TOPBP1,FANCI,CLSPN	18/81
14_Member	GO Biological Processes	GO:1902749	regulation of cell cycle G2/M phase transition	-14.9821	-12.703	6.72892e+81	BRCA1,CCNB1,CDK1,CDC6,CDC25A,CDC25B,CDK6,CDKN1A,CENPF,ORC1,PLK1,RAD21,RRM1,AURKA,PKMYT1,AURKB,KIF14,TOPBP1,FBXO5,DTL,CLSPN	21/122
14_Member	GO Biological Processes	GO:0031570	DNA integrity checkpoint signaling	-13.734	-11.494	6.72984e+82	BRCA1,CDK1,CDC6,CDKN1A,PLK3,E2F1,FANCD2,H2AX,MDM2,MSH2,ORC1,PLK1,CDC45,TIMELESS,TOPBP1,RPS27L,GTSE1,DTL,CLSPN,CDT1	20/124
14_Member	GO Biological Processes	GO:0044774	mitotic DNA integrity checkpoint signaling	-10.7407	-8.628	6.72984e+61	BRCA1,CDK1,CDC6,CDKN1A,PLK3,FANCD2,MDM2,MSH2,ORC1,PLK1,TOPBP1,RPS27L,GTSE1,DTL,CLSPN	15/89
14_Member	GO Biological Processes	GO:0000077	DNA damage checkpoint signaling	-9.11274	-7.087	6.72983e+62	BRCA1,CDK1,CDKN1A,PLK3,E2F1,FANCD2,H2AX,MDM2,MSH2,PLK1,TOPBP1,RPS27L,GTSE1,DTL,CLSPN	15/115
14_Member	GO Biological Processes	GO:0044773	mitotic DNA damage checkpoint signaling	-8.84811	-6.841	6.72983e+54	BRCA1,CDK1,CDKN1A,PLK3,FANCD2,MDM2,MSH2,PLK1,TOPBP1,RPS27L,GTSE1,DTL,CLSPN	13/85
14_Member	GO Biological Processes	GO:0010972	negative regulation of G2/M transition of mitotic cell cycle	-8.58542	-6.592	6.72984e+47	BRCA1,CDK1,CDC6,CDKN1A,ORC1,PLK1,RAD21,PKMYT1,AURKB,TOPBP1,DTL,CLSPN	26999
14_Member	GO Biological Processes	GO:1902750	negative regulation of cell cycle G2/M phase transition	-8.4458	-6.458	6.72984e+47	BRCA1,CDK1,CDC6,CDKN1A,ORC1,PLK1,RAD21,PKMYT1,AURKB,TOPBP1,DTL,CLSPN	27729
14_Member	GO Biological Processes	GO:0042770	signal transduction in response to DNA damage	-7.58923	-5.649	6.72983e+62	BRCA1,CDK1,CDKN1A,PLK3,E2F1,FANCD2,H2AX,MDM2,MSH2,PLK1,TOPBP1,RPS27L,GTSE1,DTL,CLSPN	15/148
14_Member	GO Biological Processes	GO:0044818	mitotic G2/M transition checkpoint	-6.56798	-4.689	6.72984e+35	BRCA1,CDK1,CDC6,CDKN1A,ORC1,PLK1,TOPBP1,DTL,CLSPN	20333
14_Member	GO Biological Processes	GO:0007095	mitotic G2 DNA damage checkpoint signaling	-5.67322	-3.864	6.72983e+28	BRCA1,CDK1,CDKN1A,PLK1,TOPBP1,DTL,CLSPN	13697
15_Summary	Reactome Gene Sets	R-HSA-453274	Mitotic G2-G2/M phases	-15.6786	-13.377	8.90892e+111	CCNA2,CCNB1,CDK1,CDC25A,CDC25B,CDKN1A,CENPF,E2F1,MYBL2,NEK2,PLK1,AURKA,CCNB2,CCP110,TUBA1B,TUBB4B,PLK4,TPX2,GTSE1,CEP78,TUBA1C,NEDD1,TUBB,MZT1,TNPO1,SSBP1	26/-
15_Member	Reactome Gene Sets	R-HSA-453274	Mitotic G2-G2/M phases	-15.6786	-13.377	8.90892e+103	CCNA2,CCNB1,CDK1,CDC25A,CDC25B,CDKN1A,CENPF,E2F1,MYBL2,NEK2,PLK1,AURKA,CCNB2,CCP110,TUBA1B,TUBB4B,PLK4,TPX2,GTSE1,CEP78,TUBA1C,NEDD1,TUBB,MZT1	24/159
15_Member	Reactome Gene Sets	R-HSA-69275	G2/M Transition	-14.7584	-12.491	8.90892e+99	CCNA2,CCNB1,CDK1,CDC25A,CDC25B,CDKN1A,CENPF,MYBL2,NEK2,PLK1,AURKA,CCNB2,CCP110,TUBA1B,TUBB4B,PLK4,TPX2,GTSE1,CEP78,TUBA1C,NEDD1,TUBB,MZT1	23/157
15_Member	Reactome Gene Sets	R-HSA-2565942	Regulation of PLK1 Activity at G2/M Transition	-8.58542	-6.592	8.91983e+52	CCNB1,CDK1,NEK2,PLK1,AURKA,CCNB2,CCP110,TUBB4B,PLK4,CEP78,NEDD1,TUBB	26999
15_Member	Reactome Gene Sets	R-HSA-8854518	AURKA Activation by TPX2	-8.28464	-6.305	9.83475e+50	CDK1,NEK2,PLK1,AURKA,CCP110,TUBB4B,PLK4,TPX2,CEP78,NEDD1,TUBB	22951
15_Member	Reactome Gene Sets	R-HSA-380320	Recruitment of NuMA to mitotic centrosomes	-7.92849	-5.967	9.83475e+57	CDK1,NEK2,PLK1,CCP110,TUBA1B,TUBB4B,PLK4,CEP78,TUBA1C,NEDD1,TUBB,MZT1	30651
15_Member	Reactome Gene Sets	R-HSA-380270	Recruitment of mitotic centrosome proteins and complexes	-6.65576	-4.772	9.83475e+47	CDK1,NEK2,PLK1,CCP110,TUBB4B,PLK4,CEP78,NEDD1,TUBB,MZT1	25842
15_Member	Reactome Gene Sets	R-HSA-380287	Centrosome maturation	-6.65576	-4.772	9.83475e+47	CDK1,NEK2,PLK1,CCP110,TUBB4B,PLK4,CEP78,NEDD1,TUBB,MZT1	25842
15_Member	Reactome Gene Sets	R-HSA-380259	Loss of Nlp from mitotic centrosomes	-6.23322	-4.388	9.83475e+41	CDK1,NEK2,PLK1,CCP110,TUBB4B,PLK4,CEP78,NEDD1,TUBB	22160
15_Member	Reactome Gene Sets	R-HSA-380284	Loss of proteins required for interphase microtubule organization from the centrosome	-6.23322	-4.388	9.83475e+41	CDK1,NEK2,PLK1,CCP110,TUBB4B,PLK4,CEP78,NEDD1,TUBB	22160
15_Member	Reactome Gene Sets	R-HSA-5620912	Anchoring of the basal body to the plasma membrane	-5.20965	-3.462	9.83475e+41	CDK1,NEK2,PLK1,CCP110,TUBB4B,PLK4,CEP78,NEDD1,TUBB	29099
15_Member	Reactome Gene Sets	R-HSA-5617833	Cilium Assembly	-4.51262	-2.843	9.83384e+55	CDK1,TNPO1,NEK2,PLK1,CCP110,TUBA1B,TUBB4B,PLK4,CEP78,TUBA1C,NEDD1,TUBB	12/172
15_Member	Reactome Gene Sets	R-HSA-1852241	Organelle biogenesis and maintenance	-3.39484	-1.88	9.83384e+59	CDK1,TNPO1,NEK2,PLK1,SSBP1,CCP110,TUBA1B,TUBB4B,PLK4,CEP78,TUBA1C,NEDD1,TUBB	13/259
16_Summary	Reactome Gene Sets	R-HSA-983189	Kinesins	-15.5591	-13.261	1062,3799,3832,3833,3835,9585,10112,10376,10383,11004,24137,29127,56992,81930,84790,146909,10945,59,829,4628,4651,9493,9928,203068,5576,23468,4121,490,857,928,1606,3655,5328,5874,8793,23657,50848,140885,2697,3092,5286,7184,10525,10971,109,3837,9787,23162,25777,84131,899,991,3146,3693,5795,5817,11065,27338,53339,114907	CENPE,KIF5B,KIF11,KIFC1,KIF22,KIF20B,KIF20A,TUBA1B,TUBB4B,KIF2C,KIF4A,RACGAP1,KIF15,KIF18A,TUBA1C,KIF18B,KDELR1,ACTA2,CAPZA1,MYH10,MYO10,KIF23,KIF14,TUBB,PRKAR2A,CBX5,MAN1A1,ATP2B1,CAV1,CD9,DGKA,ITGA6,PLAU,RAB27B,TNFRSF10D,SLC7A11,F11R,SIRPA,GJA1,HIP1,PIK3C2A,HSP90B1,HYOU1,YWHAQ,ADCY3,KPNB1,DLGAP5,MAPK8IP3,SUN2,CEP78,CCNF,CDC20,HMGB1,ITGB5,PTPRJ,PVR,UBE2C,UBE2S,BTBD1,FBXO32	60/-
16_Member	Reactome Gene Sets	R-HSA-983189	Kinesins	-15.5591	-13.261	1.06238e+74	CENPE,KIF5B,KIF11,KIFC1,KIF22,KIF20B,KIF20A,TUBA1B,TUBB4B,KIF2C,KIF4A,RACGAP1,KIF15,KIF18A,TUBA1C,KIF18B	16/54
16_Member	Reactome Gene Sets	R-HSA-6811434	COPI-dependent Golgi-to-ER retrograde traffic	-12.6938	-10.49	1.06238e+79	CENPE,KIF5B,KIF11,KIFC1,KIF22,KIF20B,KIF20A,TUBA1B,TUBB4B,KDELR1,KIF2C,KIF4A,RACGAP1,KIF15,KIF18A,TUBA1C,KIF18B	17/93
16_Member	KEGG Pathway	hsa04814	Motor proteins	-11.6852	-9.529	5.98291e+96	ACTA2,CAPZA1,CENPE,KIF5B,KIF11,KIFC1,KIF22,MYH10,MYO10,KIF23,KIF20B,KIF14,KIF20A,TUBA1B,TUBB4B,KIF2C,KIF4A,KIF15,KIF18A,TUBA1C,KIF18B,TUBB	22/197
16_Member	Reactome Gene Sets	R-HSA-8856688	Golgi-to-ER retrograde transport	-11.6758	-9.523	8.29106e+82	CAPZA1,CENPE,KIF5B,KIF11,KIFC1,KIF22,KIF20B,KIF20A,TUBA1B,TUBB4B,KDELR1,KIF2C,KIF4A,RACGAP1,KIF15,KIF18A,TUBA1C,KIF18B	18/123
16_Member	Reactome Gene Sets	R-HSA-983231	Factors involved in megakaryocyte development and platelet production	-11.1467	-9.024	8.29106e+86	CAPZA1,CENPE,KIF5B,KIF11,KIFC1,KIF22,PRKAR2A,KIF20B,KIF20A,TUBA1B,TUBB4B,KIF2C,CBX5,KIF4A,RACGAP1,KIF15,KIF18A,TUBA1C,KIF18B	19/150
16_Member	Reactome Gene Sets	R-HSA-6811442	Intra-Golgi and retrograde Golgi-to-ER traffic	-9.62654	-7.573	8.29106e+86	CAPZA1,CENPE,KIF5B,KIF11,KIFC1,KIF22,MAN1A1,KIF20B,KIF20A,TUBA1B,TUBB4B,KDELR1,KIF2C,KIF4A,RACGAP1,KIF15,KIF18A,TUBA1C,KIF18B	19/183
16_Member	Reactome Gene Sets	R-HSA-2132295	MHC class II antigen presentation	-8.67397	-6.675	8.29106e+63	CAPZA1,CENPE,KIF5B,KIF11,KIF22,KIF20A,TUBA1B,TUBB4B,KIF2C,KIF4A,RACGAP1,KIF15,KIF18A,TUBA1C	14/105
16_Member	Reactome Gene Sets	R-HSA-109582	Hemostasis	-8.13238	-6.164	4.9083e+131	ATP2B1,CAPZA1,CAV1,CD9,CENPE,DGKA,ITGA6,KIF5B,KIF11,KIFC1,KIF22,PLAU,PRKAR2A,RAB27B,TNFRSF10D,KIF20B,KIF20A,TUBA1B,TUBB4B,KIF2C,CBX5,SLC7A11,KIF4A,RACGAP1,F11R,KIF15,KIF18A,TUBA1C,SIRPA,KIF18B	30/535
16_Member	Reactome Gene Sets	R-HSA-5653656	Vesicle-mediated transport	-5.23628	-3.487	8.29106e+116	CAPZA1,CENPE,GJA1,HIP1,KIF5B,KIF11,KIFC1,KIF22,MAN1A1,PIK3C2A,RAB27B,HSP90B1,KIF20B,KIF20A,TUBA1B,TUBB4B,HYOU1,KDELR1,YWHAQ,KIF2C,KIF4A,RACGAP1,KIF15,KIF18A,TUBA1C,KIF18B	26/585
16_Member	GO Biological Processes	GO:0007018	microtubule-based movement	-5.20305	-3.461	1.09106e+97	ADCY3,CENPE,KIF5B,KIF11,KIFC1,KIF22,KPNB1,RAB27B,KIF23,KIF20B,DLGAP5,KIF14,KIF20A,TUBB4B,KIF2C,MAPK8IP3,KIF4A,SUN2,KIF15,KIF18A,CEP78,KIF18B	22/447
16_Member	Reactome Gene Sets	R-HSA-199991	Membrane Trafficking	-4.71106	-3.019	8.29106e+107	CAPZA1,CENPE,GJA1,HIP1,KIF5B,KIF11,KIFC1,KIF22,MAN1A1,PIK3C2A,RAB27B,KIF20B,KIF20A,TUBA1B,TUBB4B,KDELR1,YWHAQ,KIF2C,KIF4A,RACGAP1,KIF15,KIF18A,TUBA1C,KIF18B	24/553
16_Member	Reactome Gene Sets	R-HSA-1280218	Adaptive Immune System	-3.86246	-2.27	8.299e+106	CAPZA1,CCNF,CDC20,CENPE,HMGB1,ITGB5,KIF5B,KIF11,KIF22,PTPRJ,PVR,KIF20A,TUBA1B,TUBB4B,KIF2C,UBE2C,KIF4A,UBE2S,RACGAP1,BTBD1,KIF15,KIF18A,TUBA1C,FBXO32	24/627
17_Summary	Canonical Pathways	M46	PID ATR PATHWAY	-12.0373	-9.864	8.90991e+149	CCNA2,CDC6,CDC25A,FANCD2,MCM2,MCM7,MDM2,PLK1,RFC3,TIMELESS,TOPBP1,CLSPN,BRCA1,FANCA,FEN1,MSH6,H2AX,HMGB1,MSH2,POLE,RFC1,USP1,EXO1,FANCI,NEIL3,CCNB1,CDK1,POLA1,KPNA2,ASCC3,UBE2T,DTL,RRM1,POLQ,TOP2A,CENPF,HMGN1	37/-
17_Member	Canonical Pathways	M46	PID ATR PATHWAY	-12.0373	-9.864	8.90991e+46	CCNA2,CDC6,CDC25A,FANCD2,MCM2,MCM7,MDM2,PLK1,RFC3,TIMELESS,TOPBP1,CLSPN	14580
17_Member	WikiPathways	WP4946	DNA repair pathways full network	-8.79921	-6.796	6.72218e+60	BRCA1,FANCA,FANCD2,FEN1,MSH6,H2AX,HMGB1,MSH2,POLE,RFC1,RFC3,USP1,EXO1,FANCI,NEIL3	15/121
17_Member	CORUM	CORUM:1005	RC complex during G2/M-phase of cell cycle	-7.51974	-5.585	8.90892e+20	CCNA2,CCNB1,CDK1,POLA1,POLE,RFC1	45821
17_Member	Reactome Gene Sets	R-HSA-73894	DNA Repair	-6.46443	-4.591	8.90218e+81	CCNA2,FANCD2,FEN1,MSH6,H2AX,KPNA2,MSH2,POLE,RFC1,RFC3,USP1,TIMELESS,ASCC3,TOPBP1,UBE2T,DTL,FANCI,NEIL3,CLSPN	19/286
17_Member	CORUM	CORUM:1003	RC complex (Replication competent complex)	-5.06578	-3.341	890542259815983	CCNA2,POLA1,RFC1,RFC3	45756
17_Member	CORUM	CORUM:1004	RC complex during S-phase of cell cycle	-4.33464	-2.683	890542254265981	CCNA2,POLA1,POLE,RFC1	45760
17_Member	KEGG Pathway	hsa03410	Base excision repair	-4.1512	-2.515	2.23731e+24	FEN1,HMGB1,POLE,RFC1,RFC3,NEIL3	15858
17_Member	Reactome Gene Sets	R-HSA-110314	Recognition of DNA damage by PCNA-containing replication complex	-3.99156	-2.38	5.4266e+20	POLE,RFC1,RFC3,USP1,DTL	45806
17_Member	GO Biological Processes	GO:0000731	DNA synthesis involved in DNA repair	-3.9828	-2.374	5.42254e+25	POLA1,POLE,RFC3,RRM1,POLQ,DTL	16954
17_Member	Reactome Gene Sets	R-HSA-5693532	DNA Double-Strand Break Repair	-3.86447	-2.271	8.90224e+40	CCNA2,FEN1,H2AX,KPNA2,POLE,RFC1,RFC3,TIMELESS,TOPBP1,CLSPN	10/143
17_Member	CORUM	CORUM:1099	DNA synthesome complex (17 subunits)	-3.83511	-2.252	5422542659817150	POLA1,POLE,RFC1,TOP2A	45764
17_Member	CORUM	CORUM:1111	DNA synthesome complex (17 subunits)	-3.83511	-2.252	5422542659817150	POLA1,POLE,RFC1,TOP2A	45764
17_Member	GO Biological Processes	GO:0071897	DNA biosynthetic process	-3.7809	-2.207	1.06354e+33	CENPF,POLA1,POLE,RFC1,RFC3,RRM1,POLQ,DTL	34547
17_Member	Reactome Gene Sets	R-HSA-5693538	Homology Directed Repair	-3.68074	-2.122	8.90224e+36	CCNA2,FEN1,H2AX,POLE,RFC1,RFC3,TIMELESS,TOPBP1,CLSPN	9/123
17_Member	Reactome Gene Sets	R-HSA-69186	Lagging Strand Synthesis	-3.63465	-2.084	2237542259815980	FEN1,POLA1,RFC1,RFC3	45766
17_Member	Reactome Gene Sets	R-HSA-5651801	PCNA-Dependent Long Patch Base Excision Repair	-3.54341	-2.008	2237542659815980	FEN1,POLE,RFC1,RFC3	45767
17_Member	Reactome Gene Sets	R-HSA-110373	Resolution of AP sites via the multiple-nucleotide patch replacement pathway	-3.15492	-1.673	2237542659815980	FEN1,POLE,RFC1,RFC3	45772
17_Member	Reactome Gene Sets	R-HSA-5693567	HDR through Homologous Recombination (HRR) or Single Strand Annealing (SSA)	-3.0879	-1.616	8.90301e+32	CCNA2,H2AX,POLE,RFC1,RFC3,TIMELESS,TOPBP1,CLSPN	8/119
17_Member	Reactome Gene Sets	R-HSA-180786	Extension of Telomeres	-3.07319	-1.604	8.90224e+18	CCNA2,FEN1,POLA1,RFC1,RFC3	16558
17_Member	Reactome Gene Sets	R-HSA-73893	DNA Damage Bypass	-2.98607	-1.529	5.4266e+20	POLE,RFC1,RFC3,USP1,DTL	17288
17_Member	CORUM	CORUM:1098	DNA synthesome complex (13 subunits)	-2.94903	-1.5	542259817153	POLA1,RFC1,TOP2A	45729
17_Member	Reactome Gene Sets	R-HSA-69091	Polymerase switching	-2.94903	-1.5	542259815983	POLA1,RFC1,RFC3	45729
17_Member	Reactome Gene Sets	R-HSA-69109	Leading Strand Synthesis	-2.94903	-1.5	542259815983	POLA1,RFC1,RFC3	45729
17_Member	Reactome Gene Sets	R-HSA-174417	Telomere C-strand (Lagging Strand) Synthesis	-2.90392	-1.464	2237542259815980	FEN1,POLA1,RFC1,RFC3	45776
17_Member	CORUM	CORUM:1108	DNA synthesome complex (15 subunits)	-2.75803	-1.343	542254265981	POLA1,POLE,RFC1	45731
17_Member	Reactome Gene Sets	R-HSA-73933	Resolution of Abasic Sites (AP sites)	-2.74069	-1.329	2237542659815980	FEN1,POLE,RFC1,RFC3	11780
17_Member	Reactome Gene Sets	R-HSA-73884	Base Excision Repair	-2.62616	-1.232	2.2373e+24	FEN1,H2AX,POLE,RFC1,RFC3,NEIL3	30103
17_Member	Reactome Gene Sets	R-HSA-5693607	Processing of DNA double-strand break ends	-2.52203	-1.149	8.90301e+24	CCNA2,H2AX,RFC3,TIMELESS,TOPBP1,CLSPN	31564
17_Member	Reactome Gene Sets	R-HSA-174411	Polymerase switching on the C-strand of the telomere	-2.32401	-0.989	542259815983	POLA1,RFC1,RFC3	45737
17_Member	Reactome Gene Sets	R-HSA-5696397	Gap-filling DNA repair synthesis and ligation in GG-NER	-2.21022	-0.904	542659815983	POLE,RFC1,RFC3	45739
17_Member	Reactome Gene Sets	R-HSA-157579	Telomere Maintenance	-2.10043	-0.819	8.90224e+22	CCNA2,FEN1,H2AX,POLA1,RFC1,RFC3	6/105
17_Member	WikiPathways	WP5114	Nucleotide excision repair in xeroderma pigmentosum	-2.09761	-0.819	6.72315e+18	BRCA1,HMGN1,POLE,RFC1,RFC3	27515
18_Summary	WikiPathways	WP707	DNA damage response	-11.2125	-9.081	6.72892e+122	BRCA1,CCNB1,CDK1,CDC25A,CDK6,CDKN1A,E2F1,FANCD2,H2AX,MDM2,RFC1,SMC1A,CCNB2,BBC3,ECT2,MSH2,RRM1,RAD51AP1,TOPBP1,TIGAR,NUCKS1,AEN,EXO1,BNIP3,FGF2,GJA1,AURKB,OXSR1,F11R,PBK	30/-
18_Member	WikiPathways	WP707	DNA damage response	-11.2125	-9.081	6.72892e+52	BRCA1,CCNB1,CDK1,CDC25A,CDK6,CDKN1A,E2F1,FANCD2,H2AX,MDM2,RFC1,SMC1A,CCNB2,BBC3	14/69
18_Member	WikiPathways	WP1530	miRNA regulation of DNA damage response	-10.8599	-8.742	6.72892e+52	BRCA1,CCNB1,CDK1,CDC25A,CDK6,CDKN1A,E2F1,FANCD2,H2AX,MDM2,RFC1,SMC1A,CCNB2,BBC3	14/73
18_Member	WikiPathways	WP2516	ATM signaling	-7.83934	-5.883	6.72892e+31	BRCA1,CCNB1,CDK1,CDC25A,CDKN1A,FANCD2,H2AX,MDM2,SMC1A	14855
18_Member	GO Biological Processes	GO:0010212	response to ionizing radiation	-6.93522	-5.037	6.72103e+60	BRCA1,CDKN1A,ECT2,FANCD2,H2AX,MDM2,MSH2,RRM1,RAD51AP1,TOPBP1,BBC3,TIGAR,NUCKS1,AEN	14/143
18_Member	Canonical Pathways	M84	PID ATM PATHWAY	-4.75315	-3.058	6.72993e+21	BRCA1,CDC25A,FANCD2,H2AX,MDM2,SMC1A	12571
18_Member	GO Biological Processes	GO:0071479	cellular response to ionizing radiation	-4.52482	-2.854	6.72103e+33	BRCA1,CDKN1A,ECT2,H2AX,MDM2,RAD51AP1,BBC3,NUCKS1	27242
18_Member	WikiPathways	WP3959	DNA IR double strand breaks and cellular response via ATM	-4.48956	-2.822	6.72187e+26	BRCA1,E2F1,FANCD2,H2AX,MDM2,SMC1A,EXO1	20271
18_Member	GO Biological Processes	GO:0071214	cellular response to abiotic stimulus	-3.90175	-2.303	6.64673e+65	BNIP3,BRCA1,CDC25A,CDKN1A,ECT2,FGF2,GJA1,H2AX,MDM2,AURKB,OXSR1,RAD51AP1,BBC3,F11R,PBK,NUCKS1	16/328
18_Member	GO Biological Processes	GO:0104004	cellular response to environmental stimulus	-3.90175	-2.303	6.64673e+65	BNIP3,BRCA1,CDC25A,CDKN1A,ECT2,FGF2,GJA1,H2AX,MDM2,AURKB,OXSR1,RAD51AP1,BBC3,F11R,PBK,NUCKS1	16/328
18_Member	GO Biological Processes	GO:0071478	cellular response to radiation	-3.75972	-2.189	6.72993e+45	BRCA1,CDC25A,CDKN1A,ECT2,H2AX,MDM2,AURKB,RAD51AP1,BBC3,PBK,NUCKS1	11/176
18_Member	GO Biological Processes	GO:0010332	response to gamma radiation	-2.67716	-1.276	1.02622e+20	CDKN1A,FANCD2,H2AX,MDM2,TIGAR	20210
19_Summary	WikiPathways	WP1971	Integrated cancer pathway	-11.2097	-9.081	6.72984e+106	BRCA1,CDK1,CDC25A,CDC25B,CDKN1A,CDKN2B,E2F1,MSH6,MDM2,MSH2,PLK1,BBC3,PLK3,ODC1,SMARCA4,AURKA,VEGFA,RASA1,CDK6,DNMT1,GLS,STMN1,MMP16,PLAU,THBS1,KIF23,CDCA5	27/-
19_Member	WikiPathways	WP1971	Integrated cancer pathway	-11.2097	-9.081	6.72984e+44	BRCA1,CDK1,CDC25A,CDC25B,CDKN1A,CDKN2B,E2F1,MSH6,MDM2,MSH2,PLK1,BBC3	16772
19_Member	WikiPathways	WP1984	Integrated breast cancer pathway	-5.77859	-3.959	6.72994e+48	BRCA1,CDC25A,CDC25B,PLK3,E2F1,MSH6,MDM2,MSH2,ODC1,PLK1,SMARCA4,AURKA,VEGFA	13/153
19_Member	WikiPathways	WP2263	Androgen receptor network in prostate cancer	-5.70872	-3.896	6.72984e+39	BRCA1,CDK1,CDC25A,CDC25B,E2F1,MSH6,MDM2,MSH2,PLK1,RASA1,SMARCA4	11/109
19_Member	KEGG Pathway	hsa05206	MicroRNAs in cancer	-4.15376	-2.517	6.72994e+62	BRCA1,CDC25A,CDC25B,CDK6,CDKN1A,DNMT1,E2F1,GLS,STMN1,MDM2,MMP16,PLAU,THBS1,VEGFA,KIF23,CDCA5	16/312
20_Summary	GO Biological Processes	GO:0065004	protein-DNA complex assembly	-11.1843	-9.058	1.06211e+100	CENPE,CENPF,CENPI,H2AX,HMGB2,MCM2,NASP,SMARCA4,TAF13,TCF4,CHAF1B,CDC45,KNTC1,DLGAP5,CHAF1A,SUPT16H,DNAJC9,ATAD2,GMNN,HJURP,ASF1B,CENPN,CDT1	23/-
20_Member	GO Biological Processes	GO:0065004	protein-DNA complex assembly	-11.1843	-9.058	1.06211e+100	CENPE,CENPF,CENPI,H2AX,HMGB2,MCM2,NASP,SMARCA4,TAF13,TCF4,CHAF1B,CDC45,KNTC1,DLGAP5,CHAF1A,SUPT16H,DNAJC9,ATAD2,GMNN,HJURP,ASF1B,CENPN,CDT1	23/230
20_Member	GO Biological Processes	GO:0071824	protein-DNA complex organization	-10.4426	-8.35	1.06211e+100	CENPE,CENPF,CENPI,H2AX,HMGB2,MCM2,NASP,SMARCA4,TAF13,TCF4,CHAF1B,CDC45,KNTC1,DLGAP5,CHAF1A,SUPT16H,DNAJC9,ATAD2,GMNN,HJURP,ASF1B,CENPN,CDT1	23/250
20_Member	GO Biological Processes	GO:0006335	DNA replication-dependent chromatin assembly	-5.97294	-4.144	4.67882e+17	NASP,CHAF1B,CHAF1A,ASF1B	45753
20_Member	CORUM	CORUM:1149	Histone H3.1 complex	-5.31535	-3.562	4.67882e+17	NASP,CHAF1B,CHAF1A,ASF1B	45755
20_Member	GO Biological Processes	GO:0034728	nucleosome organization	-4.65993	-2.974	3.01431e+48	H2AX,HMGB2,MCM2,NASP,SMARCA4,CHAF1B,CHAF1A,SUPT16H,DNAJC9,ATAD2,ASF1B	11/140
20_Member	GO Biological Processes	GO:0006334	nucleosome assembly	-4.50782	-2.839	3.01431e+44	H2AX,HMGB2,MCM2,NASP,CHAF1B,CHAF1A,SUPT16H,DNAJC9,ATAD2,ASF1B	10/120
20_Member	CORUM	CORUM:2235	ASF1-interacting protein complex	-4.36264	-2.707	82081003655723	CHAF1B,CHAF1A,ASF1B	45721
20_Member	CORUM	CORUM:2236	ASF1-histone containing complex	-4.06697	-2.446	4678820855723	NASP,CHAF1B,ASF1B	45722

## Sheet: GO_metascape_100down
GroupID	Category	Term	Description	LogP	Log(q-value)	Genes	Symbols	InTerm_InList
1_Summary	Reactome Gene Sets	R-HSA-1640170	Cell Cycle	-8.50409	-4.44187	993,4001,4998,5557,7153,10733,54821,55166,63967,81027,151648,157570,220134,9928,56992,57082,146909,3149,113115,84984	CDC25A,LMNB1,ORC1,PRIM1,TOP2A,PLK4,ERCC6L,CENPQ,CLSPN,TUBB1,SGO1,ESCO2,SKA1,KIF14,KIF15,KNL1,KIF18B,HMGB3,MTFR2,CEP19	20/-
1_Member	Reactome Gene Sets	R-HSA-1640170	Cell Cycle	-8.50409	-4.44187	993,4001,4998,5557,7153,10733,54821,55166,63967,81027,151648,157570,220134	CDC25A,LMNB1,ORC1,PRIM1,TOP2A,PLK4,ERCC6L,CENPQ,CLSPN,TUBB1,SGO1,ESCO2,SKA1	13/584
1_Member	Reactome Gene Sets	R-HSA-69278	Cell Cycle, Mitotic	-8.48311	-4.44187	993,4001,4998,5557,7153,10733,54821,55166,81027,151648,157570,220134	CDC25A,LMNB1,ORC1,PRIM1,TOP2A,PLK4,ERCC6L,CENPQ,TUBB1,SGO1,ESCO2,SKA1	12/475
1_Member	GO Biological Processes	GO:0007059	chromosome segregation	-7.80924	-3.9441	7153,9928,55166,56992,57082,81027,146909,151648,157570,220134	TOP2A,KIF14,CENPQ,KIF15,KNL1,TUBB1,KIF18B,SGO1,ESCO2,SKA1	10/335
1_Member	GO Biological Processes	GO:0098813	nuclear chromosome segregation	-6.78002	-3.03981	7153,9928,55166,56992,57082,146909,151648,220134	TOP2A,KIF14,CENPQ,KIF15,KNL1,KIF18B,SGO1,SKA1	8/234
1_Member	GO Biological Processes	GO:0051276	chromosome organization	-6.11207	-2.54796	3149,7153,9928,54821,56992,57082,146909,151648,157570,220134	HMGB3,TOP2A,KIF14,ERCC6L,KIF15,KNL1,KIF18B,SGO1,ESCO2,SKA1	10/511
1_Member	GO Biological Processes	GO:0000819	sister chromatid segregation	-5.66038	-2.17892	7153,9928,56992,57082,146909,220134	TOP2A,KIF14,KIF15,KNL1,KIF18B,SKA1	6/146
1_Member	GO Biological Processes	GO:0051310	metaphase chromosome alignment	-5.60737	-2.17892	9928,55166,57082,151648,220134	KIF14,CENPQ,KNL1,SGO1,SKA1	5/83
1_Member	Reactome Gene Sets	R-HSA-69620	Cell Cycle Checkpoints	-5.56694	-2.17892	993,4998,54821,55166,63967,151648,220134	CDC25A,ORC1,ERCC6L,CENPQ,CLSPN,SGO1,SKA1	7/237
1_Member	GO Biological Processes	GO:0048285	organelle fission	-5.4857	-2.15651	7153,9928,56992,57082,113115,146909,151648,220134	TOP2A,KIF14,KIF15,KNL1,MTFR2,KIF18B,SGO1,SKA1	8/348
1_Member	GO Biological Processes	GO:0051303	establishment of chromosome localization	-5.29539	-2.03363	9928,55166,57082,151648,220134	KIF14,CENPQ,KNL1,SGO1,SKA1	5/96
1_Member	Reactome Gene Sets	R-HSA-68877	Mitotic Prometaphase	-5.23496	-2.03363	10733,54821,55166,81027,151648,220134	PLK4,ERCC6L,CENPQ,TUBB1,SGO1,SKA1	6/173
1_Member	Reactome Gene Sets	R-HSA-9648025	EML4 and NUDC in mitotic spindle formation	-5.22977	-2.03363	54821,55166,81027,151648,220134	ERCC6L,CENPQ,TUBB1,SGO1,SKA1	5/99
1_Member	GO Biological Processes	GO:0050000	chromosome localization	-5.12496	-1.98414	9928,55166,57082,151648,220134	KIF14,CENPQ,KNL1,SGO1,SKA1	5/104
1_Member	Reactome Gene Sets	R-HSA-2500257	Resolution of Sister Chromatid Cohesion	-5.06461	-1.98414	54821,55166,81027,151648,220134	ERCC6L,CENPQ,TUBB1,SGO1,SKA1	5/107
1_Member	Reactome Gene Sets	R-HSA-68882	Mitotic Anaphase	-5.05496	-1.98414	4001,54821,55166,81027,151648,220134	LMNB1,ERCC6L,CENPQ,TUBB1,SGO1,SKA1	6/186
1_Member	Reactome Gene Sets	R-HSA-2555396	Mitotic Metaphase and Anaphase	-5.04168	-1.98414	4001,54821,55166,81027,151648,220134	LMNB1,ERCC6L,CENPQ,TUBB1,SGO1,SKA1	6/187
1_Member	Reactome Gene Sets	R-HSA-5663220	RHO GTPases Activate Formins	-4.87574	-1.8759	54821,55166,81027,151648,220134	ERCC6L,CENPQ,TUBB1,SGO1,SKA1	5/117
1_Member	GO Biological Processes	GO:0000280	nuclear division	-4.71791	-1.75586	7153,9928,56992,57082,146909,151648,220134	TOP2A,KIF14,KIF15,KNL1,KIF18B,SGO1,SKA1	7/320
1_Member	GO Biological Processes	GO:0000070	mitotic sister chromatid segregation	-4.47029	-1.55939	9928,56992,57082,146909,220134	KIF14,KIF15,KNL1,KIF18B,SKA1	5/142
1_Member	Reactome Gene Sets	R-HSA-68886	M Phase	-4.43844	-1.54333	4001,10733,54821,55166,81027,151648,220134	LMNB1,PLK4,ERCC6L,CENPQ,TUBB1,SGO1,SKA1	7/354
1_Member	Reactome Gene Sets	R-HSA-2467813	Separation of Sister Chromatids	-4.35657	-1.49142	54821,55166,81027,151648,220134	ERCC6L,CENPQ,TUBB1,SGO1,SKA1	5/150
1_Member	Reactome Gene Sets	R-HSA-141424	Amplification of signal from the kinetochores	-4.27711	-1.46632	54821,55166,151648,220134	ERCC6L,CENPQ,SGO1,SKA1	4/79
1_Member	Reactome Gene Sets	R-HSA-141444	Amplification of signal from unattached kinetochores via a MAD2 inhibitory signal	-4.27711	-1.46632	54821,55166,151648,220134	ERCC6L,CENPQ,SGO1,SKA1	4/79
1_Member	GO Biological Processes	GO:0051301	cell division	-4.22074	-1.43478	993,7153,9928,54821,57082,146909,151648,220134	CDC25A,TOP2A,KIF14,ERCC6L,KNL1,KIF18B,SGO1,SKA1	8/522
1_Member	GO Biological Processes	GO:0140014	mitotic nuclear division	-4.12296	-1.3609	9928,56992,57082,146909,220134	KIF14,KIF15,KNL1,KIF18B,SKA1	5/168
1_Member	GO Biological Processes	GO:0008608	attachment of spindle microtubules to kinetochore	-4.1121	-1.3609	57082,151648,220134	KNL1,SGO1,SKA1	3/32
1_Member	Reactome Gene Sets	R-HSA-195258	RHO GTPase Effectors	-4.07721	-1.3525	9928,54821,55166,81027,151648,220134	KIF14,ERCC6L,CENPQ,TUBB1,SGO1,SKA1	6/278
1_Member	Reactome Gene Sets	R-HSA-69618	Mitotic Spindle Checkpoint	-4.00042	-1.31137	54821,55166,151648,220134	ERCC6L,CENPQ,SGO1,SKA1	4/93
1_Member	GO Biological Processes	GO:0051656	establishment of organelle localization	-3.94157	-1.26206	4001,9928,55166,57082,84984,151648,220134	LMNB1,KIF14,CENPQ,KNL1,CEP19,SGO1,SKA1	7/425
1_Member	Canonical Pathways	M129	PID PLK1 PATHWAY	-3.63758	-0.994282	54821,63967,151648	ERCC6L,CLSPN,SGO1	3/46
1_Member	GO Biological Processes	GO:0051640	organelle localization	-3.25928	-0.702348	4001,9928,55166,57082,84984,151648,220134	LMNB1,KIF14,CENPQ,KNL1,CEP19,SGO1,SKA1	7/551
1_Member	Reactome Gene Sets	R-HSA-194315	Signaling by Rho GTPases	-3.02152	-0.518102	4001,9928,54821,55166,81027,151648,220134	LMNB1,KIF14,ERCC6L,CENPQ,TUBB1,SGO1,SKA1	7/605
1_Member	GO Biological Processes	GO:0140013	meiotic nuclear division	-2.97645	-0.491518	7153,57082,151648,220134	TOP2A,KNL1,SGO1,SKA1	4/173
1_Member	Reactome Gene Sets	R-HSA-9716542	Signaling by Rho GTPases, Miro GTPases and RHOBTB3	-2.96405	-0.485111	4001,9928,54821,55166,81027,151648,220134	LMNB1,KIF14,ERCC6L,CENPQ,TUBB1,SGO1,SKA1	7/619
1_Member	GO Biological Processes	GO:1903046	meiotic cell cycle process	-2.79344	-0.331987	7153,57082,151648,220134	TOP2A,KNL1,SGO1,SKA1	4/194
1_Member	GO Biological Processes	GO:0045132	meiotic chromosome segregation	-2.75683	-0.328378	57082,151648,220134	KNL1,SGO1,SKA1	3/92
1_Member	GO Biological Processes	GO:0051321	meiotic cell cycle	-2.35443	-0.0250012	7153,57082,151648,220134	TOP2A,KNL1,SGO1,SKA1	4/257
2_Summary	GO Biological Processes	GO:0000278	mitotic cell cycle	-6.3825	-2.73921	993,4602,4998,9928,51514,56992,57082,63967,81027,146909,220134,10733	CDC25A,MYB,ORC1,KIF14,DTL,KIF15,KNL1,CLSPN,TUBB1,KIF18B,SKA1,PLK4	12/-
2_Member	GO Biological Processes	GO:0000278	mitotic cell cycle	-6.3825	-2.73921	993,4602,4998,9928,51514,56992,57082,63967,81027,146909,220134	CDC25A,MYB,ORC1,KIF14,DTL,KIF15,KNL1,CLSPN,TUBB1,KIF18B,SKA1	11/603
2_Member	GO Biological Processes	GO:1903047	mitotic cell cycle process	-5.09228	-1.98414	993,4998,9928,51514,56992,57082,63967,146909,220134	CDC25A,ORC1,KIF14,DTL,KIF15,KNL1,CLSPN,KIF18B,SKA1	9/523
2_Member	GO Biological Processes	GO:0010389	regulation of G2/M transition of mitotic cell cycle	-5.02538	-1.98414	993,4998,9928,51514,63967	CDC25A,ORC1,KIF14,DTL,CLSPN	5/109
2_Member	GO Biological Processes	GO:1902749	regulation of cell cycle G2/M phase transition	-4.78767	-1.80713	993,4998,9928,51514,63967	CDC25A,ORC1,KIF14,DTL,CLSPN	5/122
2_Member	GO Biological Processes	GO:1901990	regulation of mitotic cell cycle phase transition	-4.30978	-1.46632	993,4998,9928,51514,57082,63967,220134	CDC25A,ORC1,KIF14,DTL,KNL1,CLSPN,SKA1	7/371
2_Member	GO Biological Processes	GO:0090068	positive regulation of cell cycle process	-4.12053	-1.3609	993,9928,10733,51514,57082,220134	CDC25A,KIF14,PLK4,DTL,KNL1,SKA1	6/273
2_Member	GO Biological Processes	GO:1901987	regulation of cell cycle phase transition	-3.61803	-0.983336	993,4998,9928,51514,57082,63967,220134	CDC25A,ORC1,KIF14,DTL,KNL1,CLSPN,SKA1	7/480
2_Member	GO Biological Processes	GO:0045787	positive regulation of cell cycle	-3.58252	-0.95626	993,9928,10733,51514,57082,220134	CDC25A,KIF14,PLK4,DTL,KNL1,SKA1	6/343
2_Member	GO Biological Processes	GO:0044818	mitotic G2/M transition checkpoint	-3.4072	-0.820811	4998,51514,63967	ORC1,DTL,CLSPN	3/55
2_Member	GO Biological Processes	GO:0007346	regulation of mitotic cell cycle	-3.34483	-0.773414	993,4998,9928,51514,57082,63967,220134	CDC25A,ORC1,KIF14,DTL,KNL1,CLSPN,SKA1	7/533
2_Member	GO Biological Processes	GO:0010564	regulation of cell cycle process	-3.06246	-0.533198	993,4998,9928,10733,51514,57082,63967,220134	CDC25A,ORC1,KIF14,PLK4,DTL,KNL1,CLSPN,SKA1	8/776
2_Member	GO Biological Processes	GO:0010972	negative regulation of G2/M transition of mitotic cell cycle	-3.04677	-0.533198	4998,51514,63967	ORC1,DTL,CLSPN	3/73
2_Member	GO Biological Processes	GO:1902750	negative regulation of cell cycle G2/M phase transition	-3.01267	-0.515501	4998,51514,63967	ORC1,DTL,CLSPN	3/75
2_Member	GO Biological Processes	GO:0044774	mitotic DNA integrity checkpoint signaling	-2.79811	-0.331987	4998,51514,63967	ORC1,DTL,CLSPN	3/89
2_Member	GO Biological Processes	GO:1901992	positive regulation of mitotic cell cycle phase transition	-2.59324	-0.200363	993,51514,220134	CDC25A,DTL,SKA1	3/105
2_Member	GO Biological Processes	GO:0031570	DNA integrity checkpoint signaling	-2.38978	-0.0431513	4998,51514,63967	ORC1,DTL,CLSPN	3/124
2_Member	GO Biological Processes	GO:1901989	positive regulation of cell cycle phase transition	-2.37036	-0.0366956	993,51514,220134	CDC25A,DTL,SKA1	3/126
2_Member	GO Biological Processes	GO:0007093	mitotic cell cycle checkpoint signaling	-2.30495	-0.000107213	4998,51514,63967	ORC1,DTL,CLSPN	3/133
2_Member	GO Biological Processes	GO:0045931	positive regulation of mitotic cell cycle	-2.27805	0	993,51514,220134	CDC25A,DTL,SKA1	3/136
2_Member	GO Biological Processes	GO:0010948	negative regulation of cell cycle process	-2.10528	0	4998,51514,63967,220134	ORC1,DTL,CLSPN,SKA1	4/303
2_Member	GO Biological Processes	GO:0000075	cell cycle checkpoint signaling	-2.01936	0	4998,51514,63967	ORC1,DTL,CLSPN	3/169
3_Summary	WikiPathways	WP2446	Retinoblastoma gene in cancer	-5.45738	-2.15651	993,4998,5557,7153,10733,3149,51514,54821,55247,55388,63967,157570,57082,151648,23468,4001	CDC25A,ORC1,PRIM1,TOP2A,PLK4,HMGB3,DTL,ERCC6L,NEIL3,MCM10,CLSPN,ESCO2,KNL1,SGO1,CBX5,LMNB1	16/-
3_Member	WikiPathways	WP2446	Retinoblastoma gene in cancer	-5.45738	-2.15651	993,4998,5557,7153,10733	CDC25A,ORC1,PRIM1,TOP2A,PLK4	5/89
3_Member	GO Biological Processes	GO:0006259	DNA metabolic process	-4.66181	-1.71749	3149,4998,5557,7153,51514,54821,55247,55388,63967,157570	HMGB3,ORC1,PRIM1,TOP2A,DTL,ERCC6L,NEIL3,MCM10,CLSPN,ESCO2	10/747
3_Member	GO Biological Processes	GO:0006270	DNA replication initiation	-4.28902	-1.46632	4998,5557,55388	ORC1,PRIM1,MCM10	3/28
3_Member	KEGG Pathway	hsa04110	Cell cycle	-4.2492	-1.451	993,4998,57082,151648,157570	CDC25A,ORC1,KNL1,SGO1,ESCO2	5/158
3_Member	Reactome Gene Sets	R-HSA-176187	Activation of ATR in response to replication stress	-4.07151	-1.3525	993,4998,63967	CDC25A,ORC1,CLSPN	3/33
3_Member	WikiPathways	WP466	DNA replication	-3.75569	-1.10362	4998,5557,55388	ORC1,PRIM1,MCM10	3/42
3_Member	Reactome Gene Sets	R-HSA-453279	Mitotic G1 phase and G1/S transition	-3.574	-0.956006	993,4998,5557,7153	CDC25A,ORC1,PRIM1,TOP2A	4/120
3_Member	Reactome Gene Sets	R-HSA-69242	S Phase	-3.42906	-0.834985	993,4998,5557,157570	CDC25A,ORC1,PRIM1,ESCO2	4/131
3_Member	WikiPathways	WP45	G1 to S cell cycle control	-3.21355	-0.663675	993,4998,5557	CDC25A,ORC1,PRIM1	3/64
3_Member	Canonical Pathways	M40	PID E2F PATHWAY	-3.04677	-0.533198	993,4998,23468	CDC25A,ORC1,CBX5	3/73
3_Member	Reactome Gene Sets	R-HSA-9645723	Diseases of programmed cell death	-2.77043	-0.32992	993,4001,5557	CDC25A,LMNB1,PRIM1	3/91
3_Member	GO Biological Processes	GO:0006260	DNA replication	-2.76107	-0.328378	4998,5557,51514,55388	ORC1,PRIM1,DTL,MCM10	4/198
3_Member	Reactome Gene Sets	R-HSA-69206	G1/S Transition	-2.57002	-0.186794	993,4998,5557	CDC25A,ORC1,PRIM1	3/107
3_Member	Reactome Gene Sets	R-HSA-69481	G2/M Checkpoints	-2.31406	-0.00117591	993,4998,63967	CDC25A,ORC1,CLSPN	3/132
3_Member	GO Biological Processes	GO:0006261	DNA-templated DNA replication	-2.2432	0	4998,5557,55388	ORC1,PRIM1,MCM10	3/140
4_Summary	GO Biological Processes	GO:0048557	embryonic digestive tract morphogenesis	-4.96299	-1.94294	2294,6664,348093,23657,83716,3776,10733,79805,4811,9788	FOXF1,SOX11,RBPMS2,SLC7A11,CRISPLD2,KCNK2,PLK4,VASH2,NID1,MTSS1	10/-
4_Member	GO Biological Processes	GO:0048557	embryonic digestive tract morphogenesis	-4.96299	-1.94294	2294,6664,348093	FOXF1,SOX11,RBPMS2	3/17
4_Member	GO Biological Processes	GO:0048566	embryonic digestive tract development	-4.07151	-1.3525	2294,6664,348093	FOXF1,SOX11,RBPMS2	3/33
4_Member	GO Biological Processes	GO:0048546	digestive tract morphogenesis	-3.55588	-0.946005	2294,6664,348093	FOXF1,SOX11,RBPMS2	3/49
4_Member	GO Biological Processes	GO:0030324	lung development	-2.80165	-0.331987	2294,6664,23657,83716	FOXF1,SOX11,SLC7A11,CRISPLD2	4/193
4_Member	GO Biological Processes	GO:0030323	respiratory tube development	-2.76909	-0.32992	2294,6664,23657,83716	FOXF1,SOX11,SLC7A11,CRISPLD2	4/197
4_Member	GO Biological Processes	GO:0060541	respiratory system development	-2.59518	-0.200363	2294,6664,23657,83716	FOXF1,SOX11,SLC7A11,CRISPLD2	4/220
4_Member	GO Biological Processes	GO:0003231	cardiac ventricle development	-2.34185	-0.0248921	2294,3776,6664	FOXF1,KCNK2,SOX11	3/129
4_Member	GO Biological Processes	GO:0048565	digestive tract development	-2.27805	0	2294,6664,348093	FOXF1,SOX11,RBPMS2	3/136
4_Member	GO Biological Processes	GO:0048568	embryonic organ development	-2.19491	0	2294,6664,10733,79805,348093	FOXF1,SOX11,PLK4,VASH2,RBPMS2	5/454
4_Member	GO Biological Processes	GO:0055123	digestive system development	-2.16862	0	2294,6664,348093	FOXF1,SOX11,RBPMS2	3/149
4_Member	GO Biological Processes	GO:0072001	renal system development	-2.0288	0	2294,4811,6664,9788	FOXF1,NID1,SOX11,MTSS1	4/319
5_Summary	GO Biological Processes	GO:0050769	positive regulation of neurogenesis	-4.49183	-1.56454	1826,4602,6664,7133,7804,10507,9928,640,3149,10326,145581	DSCAM,MYB,SOX11,TNFRSF1B,LRP8,SEMA4D,KIF14,BLK,HMGB3,SIRPB1,LRFN5	11/-
5_Member	GO Biological Processes	GO:0050769	positive regulation of neurogenesis	-4.49183	-1.56454	1826,4602,6664,7133,7804,10507	DSCAM,MYB,SOX11,TNFRSF1B,LRP8,SEMA4D	6/234
5_Member	GO Biological Processes	GO:0051962	positive regulation of nervous system development	-4.018	-1.31919	1826,4602,6664,7133,7804,10507	DSCAM,MYB,SOX11,TNFRSF1B,LRP8,SEMA4D	6/285
5_Member	GO Biological Processes	GO:0051960	regulation of nervous system development	-3.76531	-1.10428	1826,4602,6664,7133,7804,9928,10507	DSCAM,MYB,SOX11,TNFRSF1B,LRP8,KIF14,SEMA4D	7/454
5_Member	GO Biological Processes	GO:0050767	regulation of neurogenesis	-3.39507	-0.816234	1826,4602,6664,7133,7804,10507	DSCAM,MYB,SOX11,TNFRSF1B,LRP8,SEMA4D	6/372
5_Member	GO Biological Processes	GO:0010720	positive regulation of cell development	-2.97949	-0.491518	1826,4602,6664,7133,7804,10507	DSCAM,MYB,SOX11,TNFRSF1B,LRP8,SEMA4D	6/447
5_Member	GO Biological Processes	GO:0014013	regulation of gliogenesis	-2.51396	-0.149415	4602,6664,7133	MYB,SOX11,TNFRSF1B	3/112
5_Member	GO Biological Processes	GO:0046887	positive regulation of hormone secretion	-2.19291	0	640,4602,6664	BLK,MYB,SOX11	3/146
5_Member	GO Biological Processes	GO:0050865	regulation of cell activation	-2.16778	0	3149,4602,6664,7133,10326,145581	HMGB3,MYB,SOX11,TNFRSF1B,SIRPB1,LRFN5	6/653
6_Summary	Reactome Gene Sets	R-HSA-983231	Factors involved in megakaryocyte development and platelet production	-4.35657	-1.49142	4602,23468,56992,81027,146909,10733,84984,151648,220134,9928,4703,23657	MYB,CBX5,KIF15,TUBB1,KIF18B,PLK4,CEP19,SGO1,SKA1,KIF14,NEB,SLC7A11	12/-
6_Member	Reactome Gene Sets	R-HSA-983231	Factors involved in megakaryocyte development and platelet production	-4.35657	-1.49142	4602,23468,56992,81027,146909	MYB,CBX5,KIF15,TUBB1,KIF18B	5/150
6_Member	Reactome Gene Sets	R-HSA-983189	Kinesins	-3.43076	-0.834985	56992,81027,146909	KIF15,TUBB1,KIF18B	3/54
6_Member	GO Biological Processes	GO:0000226	microtubule cytoskeleton organization	-3.13705	-0.600965	10733,56992,81027,84984,146909,151648,220134	PLK4,KIF15,TUBB1,CEP19,KIF18B,SGO1,SKA1	7/578
6_Member	KEGG Pathway	hsa04814	Motor proteins	-2.76909	-0.32992	9928,56992,81027,146909	KIF14,KIF15,TUBB1,KIF18B	4/197
6_Member	Reactome Gene Sets	R-HSA-6811434	COPI-dependent Golgi-to-ER retrograde traffic	-2.74339	-0.320202	56992,81027,146909	KIF15,TUBB1,KIF18B	3/93
6_Member	GO Biological Processes	GO:0007098	centrosome cycle	-2.71697	-0.298982	10733,56992,151648	PLK4,KIF15,SGO1	3/95
6_Member	GO Biological Processes	GO:0140694	membraneless organelle assembly	-2.66244	-0.249596	4703,10733,56992,81027,220134	NEB,PLK4,KIF15,TUBB1,SKA1	5/352
6_Member	GO Biological Processes	GO:0051225	spindle assembly	-2.60503	-0.200363	56992,81027,220134	KIF15,TUBB1,SKA1	3/104
6_Member	Reactome Gene Sets	R-HSA-109582	Hemostasis	-2.58605	-0.198024	4602,23468,23657,56992,81027,146909	MYB,CBX5,SLC7A11,KIF15,TUBB1,KIF18B	6/535
6_Member	GO Biological Processes	GO:0031023	microtubule organizing center organization	-2.54726	-0.168783	10733,56992,151648	PLK4,KIF15,SGO1	3/109
6_Member	Reactome Gene Sets	R-HSA-8856688	Golgi-to-ER retrograde transport	-2.39962	-0.0485808	56992,81027,146909	KIF15,TUBB1,KIF18B	3/123
6_Member	GO Biological Processes	GO:0007051	spindle organization	-2.01936	0	56992,81027,220134	KIF15,TUBB1,SKA1	3/169
7_Summary	GO Biological Processes	GO:0008283	cell population proliferation	-4.02006	-1.31919	993,2013,4064,4602,6664,9788,9928,55388,84466	CDC25A,EMP2,CD180,MYB,SOX11,MTSS1,KIF14,MCM10,MEGF10	9/-
7_Member	GO Biological Processes	GO:0008283	cell population proliferation	-4.02006	-1.31919	993,2013,4064,4602,6664,9788,9928,55388,84466	CDC25A,EMP2,CD180,MYB,SOX11,MTSS1,KIF14,MCM10,MEGF10	9/718
8_Summary	GO Biological Processes	GO:0007507	heart development	-3.91446	-1.24429	2013,2257,2294,3776,4703,6664,7133,8862,3749	EMP2,FGF12,FOXF1,KCNK2,NEB,SOX11,TNFRSF1B,APLN,KCNC4	9/-
8_Member	GO Biological Processes	GO:0007507	heart development	-3.91446	-1.24429	2013,2257,2294,3776,4703,6664,7133,8862	EMP2,FGF12,FOXF1,KCNK2,NEB,SOX11,TNFRSF1B,APLN	8/578
8_Member	GO Biological Processes	GO:0001508	action potential	-2.34185	-0.0248921	2257,3749,3776	FGF12,KCNC4,KCNK2	3/129
9_Summary	GO Biological Processes	GO:0098609	cell-cell adhesion	-3.25928	-0.702348	1826,2294,10507,23657,81027,84466,145581,7804	DSCAM,FOXF1,SEMA4D,SLC7A11,TUBB1,MEGF10,LRFN5,LRP8	8/-
9_Member	GO Biological Processes	GO:0098609	cell-cell adhesion	-3.25928	-0.702348	1826,2294,10507,23657,81027,84466,145581	DSCAM,FOXF1,SEMA4D,SLC7A11,TUBB1,MEGF10,LRFN5	7/551
9_Member	GO Biological Processes	GO:0050807	regulation of synapse organization	-2.04749	0	7804,10507,23657,145581	LRP8,SEMA4D,SLC7A11,LRFN5	4/315
9_Member	GO Biological Processes	GO:0050803	regulation of synapse structure or activity	-2.01956	0	7804,10507,23657,145581	LRP8,SEMA4D,SLC7A11,LRFN5	4/321
10_Summary	GO Biological Processes	GO:0034109	homotypic cell-cell adhesion	-3.17443	-0.631504	23657,81027,84466,2013,4064,4602,10202	SLC7A11,TUBB1,MEGF10,EMP2,CD180,MYB,DHRS2	7/-
10_Member	GO Biological Processes	GO:0034109	homotypic cell-cell adhesion	-3.17443	-0.631504	23657,81027,84466	SLC7A11,TUBB1,MEGF10	3/66
10_Member	GO Biological Processes	GO:0001775	cell activation	-2.48132	-0.125825	2013,4064,4602,10202,23657,81027,84466	EMP2,CD180,MYB,DHRS2,SLC7A11,TUBB1,MEGF10	7/754
11_Summary	GO Biological Processes	GO:0030307	positive regulation of cell growth	-3.04295	-0.533198	1826,3484,10507,114804,2051,4147,7804,9928,79805,3776,993,2013,63967,81027	DSCAM,IGFBP1,SEMA4D,RNF157,EPHB6,MATN2,LRP8,KIF14,VASH2,KCNK2,CDC25A,EMP2,CLSPN,TUBB1	14/-
11_Member	GO Biological Processes	GO:0030307	positive regulation of cell growth	-3.04295	-0.533198	1826,3484,10507,114804	DSCAM,IGFBP1,SEMA4D,RNF157	4/166
11_Member	GO Biological Processes	GO:0007411	axon guidance	-2.53943	-0.165644	1826,2051,4147,10507	DSCAM,EPHB6,MATN2,SEMA4D	4/228
11_Member	GO Biological Processes	GO:0097485	neuron projection guidance	-2.53261	-0.163475	1826,2051,4147,10507	DSCAM,EPHB6,MATN2,SEMA4D	4/229
11_Member	GO Biological Processes	GO:0016358	dendrite development	-2.4816	-0.125825	1826,4147,7804	DSCAM,MATN2,LRP8	3/115
11_Member	GO Biological Processes	GO:0001558	regulation of cell growth	-2.37946	-0.0371994	1826,3484,9928,10507,114804	DSCAM,IGFBP1,KIF14,SEMA4D,RNF157	5/410
11_Member	GO Biological Processes	GO:0045927	positive regulation of growth	-2.34256	-0.0248921	1826,3484,10507,114804	DSCAM,IGFBP1,SEMA4D,RNF157	4/259
11_Member	GO Biological Processes	GO:0061564	axon development	-2.30545	-0.000107213	1826,2051,4147,10507,79805	DSCAM,EPHB6,MATN2,SEMA4D,VASH2	5/427
11_Member	GO Biological Processes	GO:0040008	regulation of growth	-2.28802	0	1826,3484,3776,9928,10507,114804	DSCAM,IGFBP1,KCNK2,KIF14,SEMA4D,RNF157	6/616
11_Member	GO Biological Processes	GO:0048667	cell morphogenesis involved in neuron differentiation	-2.21477	0	1826,2051,4147,7804,10507	DSCAM,EPHB6,MATN2,LRP8,SEMA4D	5/449
11_Member	GO Biological Processes	GO:0042325	regulation of phosphorylation	-2.04431	0	993,1826,2013,9928,10507,63967	CDC25A,DSCAM,EMP2,KIF14,SEMA4D,CLSPN	6/694
11_Member	GO Biological Processes	GO:0048812	neuron projection morphogenesis	-2.03095	0	1826,2051,4147,7804,10507	DSCAM,EPHB6,MATN2,LRP8,SEMA4D	5/498
11_Member	GO Biological Processes	GO:0120039	plasma membrane bounded cell projection morphogenesis	-2.01346	0	1826,2051,4147,7804,10507	DSCAM,EPHB6,MATN2,LRP8,SEMA4D	5/503
11_Member	GO Biological Processes	GO:0000902	cell morphogenesis	-2.00995	0	1826,2051,4147,7804,10507,81027	DSCAM,EPHB6,MATN2,LRP8,SEMA4D,TUBB1	6/706
11_Member	GO Biological Processes	GO:0048639	positive regulation of developmental growth	-2.00553	0	1826,10507,114804	DSCAM,SEMA4D,RNF157	3/171
12_Summary	Canonical Pathways	M3008	NABA ECM GLYCOPROTEINS	-2.77716	-0.32992	3484,4147,4811,83716,2013,2294,84466,348093,10326	IGFBP1,MATN2,NID1,CRISPLD2,EMP2,FOXF1,MEGF10,RBPMS2,SIRPB1	9/-
12_Member	Canonical Pathways	M3008	NABA ECM GLYCOPROTEINS	-2.77716	-0.32992	3484,4147,4811,83716	IGFBP1,MATN2,NID1,CRISPLD2	4/196
12_Member	GO Biological Processes	GO:0010811	positive regulation of cell-substrate adhesion	-2.37036	-0.0366956	2013,2294,4811	EMP2,FOXF1,NID1	3/126
12_Member	Canonical Pathways	M5884	NABA CORE MATRISOME	-2.25122	0	3484,4147,4811,83716	IGFBP1,MATN2,NID1,CRISPLD2	4/275
12_Member	GO Biological Processes	GO:0030198	extracellular matrix organization	-2.22393	0	2294,4147,4811,83716	FOXF1,MATN2,NID1,CRISPLD2	4/280
12_Member	GO Biological Processes	GO:0043062	extracellular structure organization	-2.21854	0	2294,4147,4811,83716	FOXF1,MATN2,NID1,CRISPLD2	4/281
12_Member	GO Biological Processes	GO:0045229	external encapsulating structure organization	-2.21317	0	2294,4147,4811,83716	FOXF1,MATN2,NID1,CRISPLD2	4/282
12_Member	GO Biological Processes	GO:0051147	regulation of muscle cell differentiation	-2.03338	0	4811,84466,348093	NID1,MEGF10,RBPMS2	3/167
12_Member	GO Biological Processes	GO:0045785	positive regulation of cell adhesion	-2.02744	0	2013,2294,4811,10326,84466	EMP2,FOXF1,NID1,SIRPB1,MEGF10	5/499
13_Summary	GO Biological Processes	GO:0071103	DNA conformation change	-2.59324	-0.200363	3149,7153,54821	HMGB3,TOP2A,ERCC6L	3/-
13_Member	GO Biological Processes	GO:0071103	DNA conformation change	-2.59324	-0.200363	3149,7153,54821	HMGB3,TOP2A,ERCC6L	3/105
14_Summary	GO Biological Processes	GO:0006865	amino acid transport	-2.26924	0	3776,23657,55244,2294,4147,81027,10434	KCNK2,SLC7A11,SLC47A1,FOXF1,MATN2,TUBB1,LYPLA1	7/-
14_Member	GO Biological Processes	GO:0006865	amino acid transport	-2.26924	0	3776,23657,55244	KCNK2,SLC7A11,SLC47A1	3/137
14_Member	GO Biological Processes	GO:0009611	response to wounding	-2.21877	0	2294,3776,4147,23657,81027	FOXF1,KCNK2,MATN2,SLC7A11,TUBB1	5/448
14_Member	GO Biological Processes	GO:0046942	carboxylic acid transport	-2.10037	0	3776,10434,23657,55244	KCNK2,LYPLA1,SLC7A11,SLC47A1	4/304
14_Member	GO Biological Processes	GO:0015849	organic acid transport	-2.09547	0	3776,10434,23657,55244	KCNK2,LYPLA1,SLC7A11,SLC47A1	4/305
15_Summary	Reactome Gene Sets	R-HSA-69275	G2/M Transition	-2.10639	0	993,10733,81027	CDC25A,PLK4,TUBB1	3/-
15_Member	Reactome Gene Sets	R-HSA-69275	G2/M Transition	-2.10639	0	993,10733,81027	CDC25A,PLK4,TUBB1	3/157
15_Member	Reactome Gene Sets	R-HSA-453274	Mitotic G2-G2/M phases	-2.09138	0	993,10733,81027	CDC25A,PLK4,TUBB1	3/159

## Sheet: GO_metascape_100up
GroupID	Category	Term	Description	LogP	Log(q-value)	Genes	Symbols	InTerm_InList
1_Summary	Canonical Pathways	M256	PID TAP63 PATHWAY	-5.14504	-0.802775	1026,2232,27113,132671,7832,3714	CDKN1A,FDXR,BBC3,SPATA18,BTG2,JAG2	6/-
1_Member	Canonical Pathways	M256	PID TAP63 PATHWAY	-5.14504	-0.802775	1026,2232,27113,132671	CDKN1A,FDXR,BBC3,SPATA18	4/54
1_Member	Canonical Pathways	M145	PID P53 DOWNSTREAM PATHWAY	-3.55928	0	1026,2232,7832,27113	CDKN1A,FDXR,BTG2,BBC3	4/137
1_Member	Canonical Pathways	M19	PID P73PATHWAY	-3.10193	0	1026,3714,27113	CDKN1A,JAG2,BBC3	3/79
1_Member	WikiPathways	WP4963	p53 transcriptional gene network	-2.84407	0	1026,7832,27113	CDKN1A,BTG2,BBC3	3/97
2_Summary	GO Biological Processes	GO:0009581	detection of external stimulus	-3.53531	0	1301,58473,114780,168507,7832	COL11A1,PLEKHB1,PKD1L2,PKD1L1,BTG2	5/-
2_Member	GO Biological Processes	GO:0009581	detection of external stimulus	-3.53531	0	1301,58473,114780,168507	COL11A1,PLEKHB1,PKD1L2,PKD1L1	4/139
2_Member	GO Biological Processes	GO:0050982	detection of mechanical stimulus	-3.51817	0	1301,114780,168507	COL11A1,PKD1L2,PKD1L1	3/57
2_Member	GO Biological Processes	GO:0009582	detection of abiotic stimulus	-3.51171	0	1301,58473,114780,168507	COL11A1,PLEKHB1,PKD1L2,PKD1L1	4/141
2_Member	GO Biological Processes	GO:0009612	response to mechanical stimulus	-2.76917	0	1301,7832,114780,168507	COL11A1,BTG2,PKD1L2,PKD1L1	4/223
3_Summary	GO Biological Processes	GO:0048708	astrocyte differentiation	-3.29225	0	728,1600,5354,7832,26999,170961,345651	C5AR1,DAB1,PLP1,BTG2,CYFIP2,ANKRD24,ACTBL2	7/-
3_Member	GO Biological Processes	GO:0048708	astrocyte differentiation	-3.29225	0	728,1600,5354	C5AR1,DAB1,PLP1	3/68
3_Member	GO Biological Processes	GO:0031175	neuron projection development	-2.23306	0	1600,5354,7832,26999,170961,345651	DAB1,PLP1,BTG2,CYFIP2,ANKRD24,ACTBL2	6/717
4_Summary	WikiPathways	WP4674	Head and neck squamous cell carcinoma	-3.18473	0	1026,3664,114788,3714,170961,3635,7832,26232,83481	CDKN1A,IRF6,CSMD3,JAG2,ANKRD24,INPP5D,BTG2,FBXO2,EPPK1	9/-
4_Member	WikiPathways	WP4674	Head and neck squamous cell carcinoma	-3.18473	0	1026,3664,114788	CDKN1A,IRF6,CSMD3	3/74
4_Member	GO Biological Processes	GO:0009913	epidermal cell differentiation	-2.8876	0	1026,3664,3714,170961	CDKN1A,IRF6,JAG2,ANKRD24	4/207
4_Member	GO Biological Processes	GO:0008544	epidermis development	-2.12297	0	1026,3664,3714,170961	CDKN1A,IRF6,JAG2,ANKRD24	4/339
4_Member	GO Biological Processes	GO:0008285	negative regulation of cell population proliferation	-2.02285	0	1026,3635,3664,7832,26232,83481	CDKN1A,INPP5D,IRF6,BTG2,FBXO2,EPPK1	6/795
5_Summary	GO Biological Processes	GO:0005976	polysaccharide metabolic process	-3.05487	0	5507,8534,8972,6518,10164	PPP1R3C,CHST1,MGAM,SLC2A5,CHST4	5/-
5_Member	GO Biological Processes	GO:0005976	polysaccharide metabolic process	-3.05487	0	5507,8534,8972	PPP1R3C,CHST1,MGAM	3/82
5_Member	GO Biological Processes	GO:0005975	carbohydrate metabolic process	-2.45818	0	5507,6518,8534,8972,10164	PPP1R3C,SLC2A5,CHST1,MGAM,CHST4	5/445
6_Summary	GO Biological Processes	GO:2001056	positive regulation of cysteine-type endopeptidase activity	-2.99489	0	9447,26999,27113	AIM2,CYFIP2,BBC3	3/-
6_Member	GO Biological Processes	GO:2001056	positive regulation of cysteine-type endopeptidase activity	-2.99489	0	9447,26999,27113	AIM2,CYFIP2,BBC3	3/86
6_Member	GO Biological Processes	GO:0010950	positive regulation of endopeptidase activity	-2.73365	0	9447,26999,27113	AIM2,CYFIP2,BBC3	3/106
6_Member	GO Biological Processes	GO:0010952	positive regulation of peptidase activity	-2.63284	0	9447,26999,27113	AIM2,CYFIP2,BBC3	3/115
6_Member	GO Biological Processes	GO:2000116	regulation of cysteine-type endopeptidase activity	-2.48232	0	9447,26999,27113	AIM2,CYFIP2,BBC3	3/130
6_Member	GO Biological Processes	GO:0052548	regulation of endopeptidase activity	-2.00225	0	9447,26999,27113	AIM2,CYFIP2,BBC3	3/194
7_Summary	GO Biological Processes	GO:0050670	regulation of lymphocyte proliferation	-2.63376	0	1026,3635,4004,7784	CDKN1A,INPP5D,LMO1,ZP3	4/-
7_Member	GO Biological Processes	GO:0050670	regulation of lymphocyte proliferation	-2.63376	0	1026,3635,4004,7784	CDKN1A,INPP5D,LMO1,ZP3	4/243
7_Member	GO Biological Processes	GO:0032944	regulation of mononuclear cell proliferation	-2.60184	0	1026,3635,4004,7784	CDKN1A,INPP5D,LMO1,ZP3	4/248
7_Member	GO Biological Processes	GO:0070663	regulation of leukocyte proliferation	-2.45246	0	1026,3635,4004,7784	CDKN1A,INPP5D,LMO1,ZP3	4/273
8_Summary	GO Biological Processes	GO:0050778	positive regulation of immune response	-2.33096	0	728,1675,3635,7784,9447,117157	C5AR1,CFD,INPP5D,ZP3,AIM2,SH2D1B	6/-
8_Member	GO Biological Processes	GO:0050778	positive regulation of immune response	-2.33096	0	728,1675,3635,7784,9447,117157	C5AR1,CFD,INPP5D,ZP3,AIM2,SH2D1B	6/684
9_Summary	GO Biological Processes	GO:0014706	striated muscle tissue development	-2.14074	0	1301,7832,8736,150094	COL11A1,BTG2,MYOM1,SIK1	4/-
9_Member	GO Biological Processes	GO:0014706	striated muscle tissue development	-2.14074	0	1301,7832,8736,150094	COL11A1,BTG2,MYOM1,SIK1	4/335
9_Member	GO Biological Processes	GO:0060537	muscle tissue development	-2.05006	0	1301,7832,8736,150094	COL11A1,BTG2,MYOM1,SIK1	4/356
