# Supplementary figures and images for: THE FAM53C/DYRK1A axis regulates the G1/S transition of the cell cycle
Source: eLife journal article supplement (doi:10.7554/elife.109708), 2025-12-11

8 May 2024

1. siCtrl 24h  
 2. siFAM53C 24h  
 3. siCtrl 48h  
 4. siFAM53C 48h

\* Non specific?

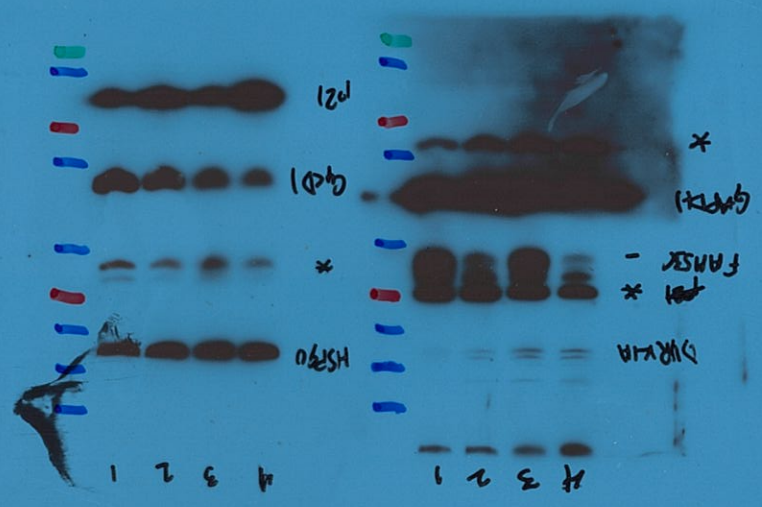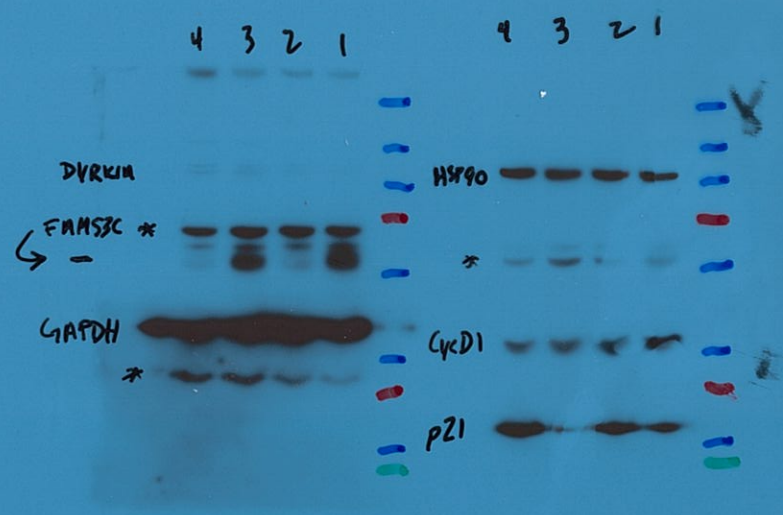

Supplement: fig1-data1 [file Xerox Scan_05082024153659.pdf › Figure 1 - Source data 1/Xerox Scan_05082024153659.pdf]

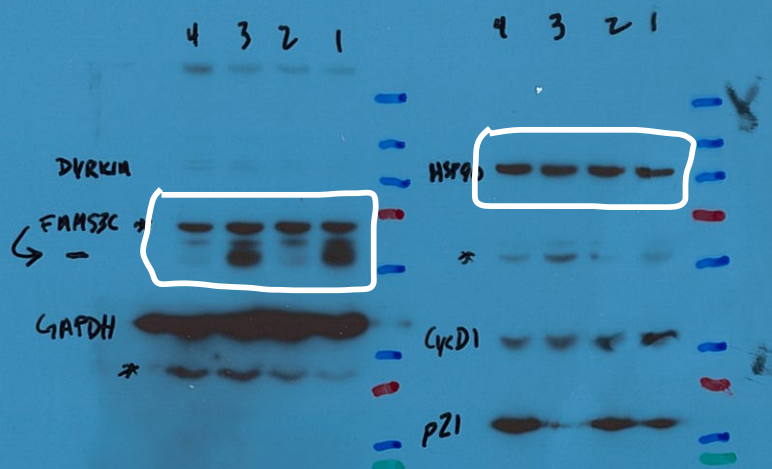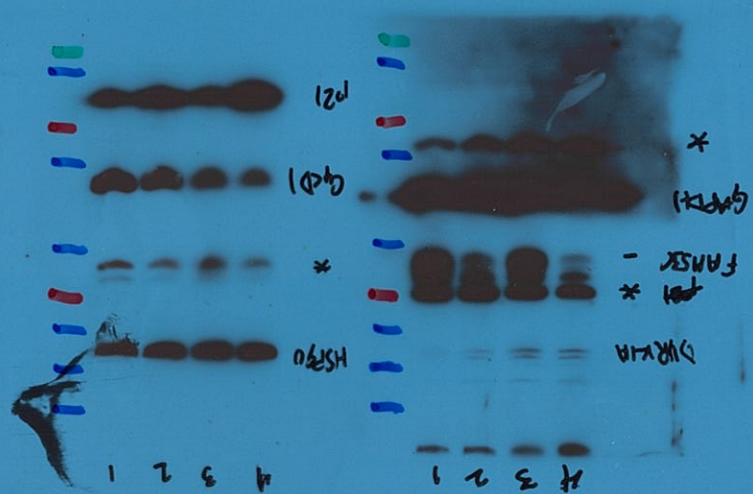

\* Non specific?

1. siCtrl 24h  
 2. siFANM3C 24h  
 3. siCtrl 48h  
 4. siFANM3C 48h

Supplement: fig1-data2 [file Xerox Scan_05082024153659 with marks.pdf › Figure 1 - Source data 2/Xerox Scan_05082024153659 with marks.pdf]

23 May 2024

SS

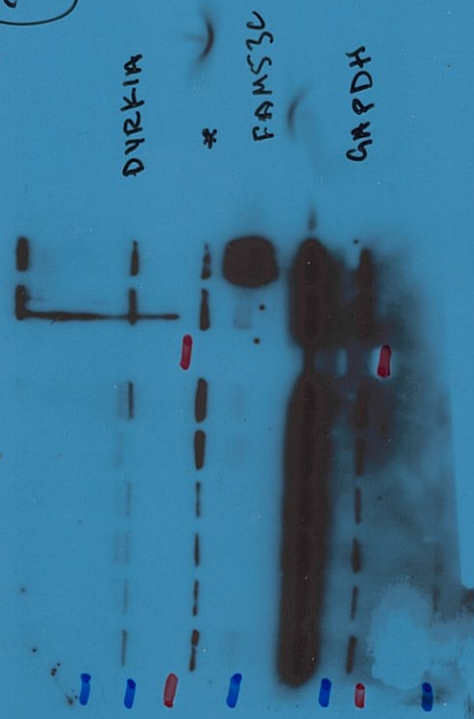

FAM RFP  
RFP RFP

SAMPLES (R2)

|           | ↑ west | ↓ west |
|-----------|--------|--------|
| DYRK (R)  | 1:200  |        |
| FAM (R)   | 1:250  |        |
| GAPDH (R) | 1:3000 |        |

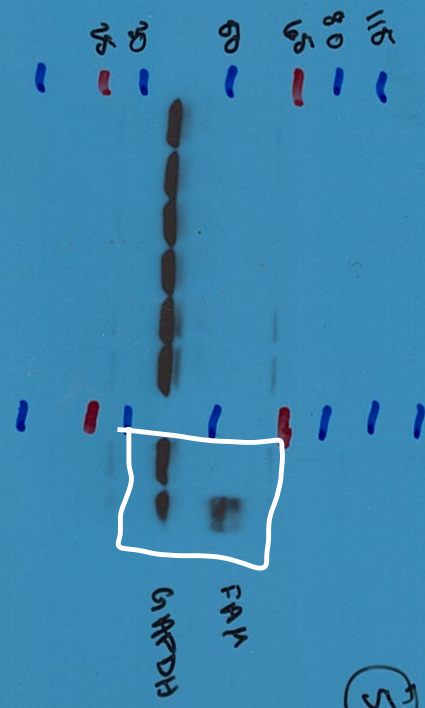

SS

23 MAY 2024

511  
80  
5  
505  
51  
505

511 80 5 505 51 505

511

2m

511 80 5 505 51 505

23 May 2024

1:3000 GAPDH (R)  
1:1000 HA (R)  
1:1000 FLAG (M)

→ 2° @ 1:5000

54

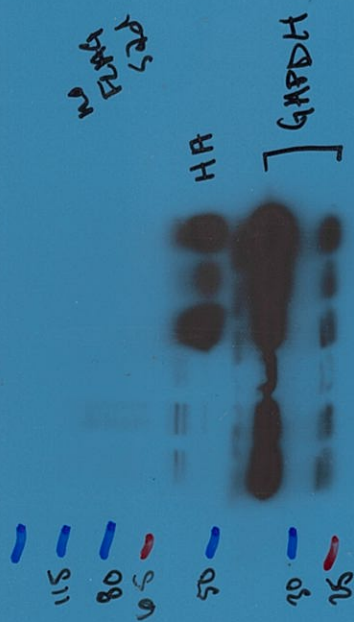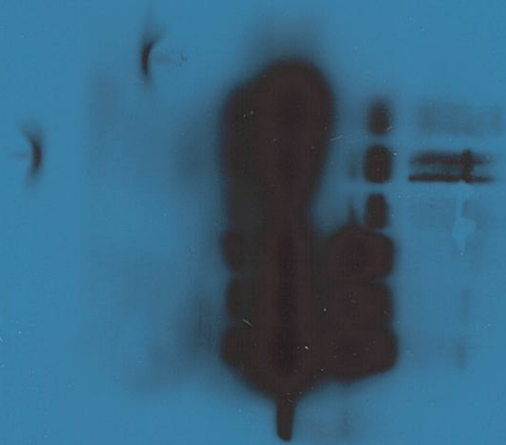

Supplement: fig1-data2 [file Xerox Scan_05282024131028 with marks.pdf › Figure 1 - Source data 2/Xerox Scan_05282024131028 with marks.pdf]

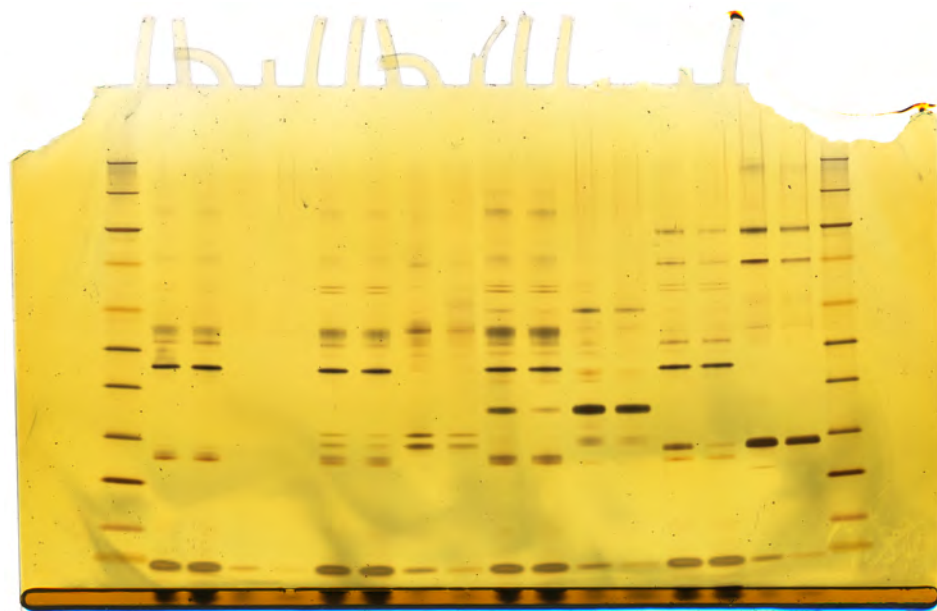

Supplement: fig2-figsupp1-data1 [file Figure2-supplement1A raw blots without labelling.pdf › Figure 2 - figure supplement 1 - Source data 1/Figure2-supplement1A raw blots without labelling.pdf]

# Figure 2-figure supplement 1

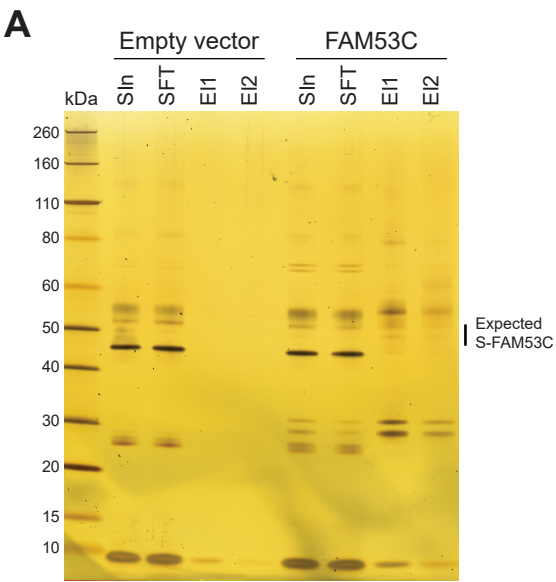

Supplement: fig2-figsupp1-data2 [file Figure2-supplement1A blots with labelling.pdf › Figure 2 - figure supplement 1 - Source data 2/Figure2-supplement1A blots with labelling.pdf]

5m

2m

6 1 1 1 1 1 1 1 1 1

1 1 1 1 1 1 1 1 1 1

5m

2m

1 1 1 1 1 1 1 1 1 1

1 1 1 1 1 1 1 1 1 1





501

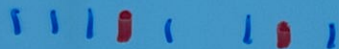

Supplement: fig4-figsupp1-data1 [file Xerox Scan_08052025135450.pdf › Figure 4 - figure supplement 1 - Source data 1/Xerox Scan_08052025135450.pdf]

5m

 $2m$

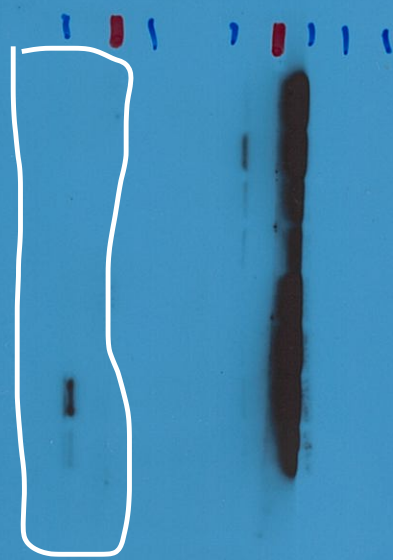

CC3

5m

2m

6 1 1 1 1 1 1 1 1 1





10s

HSP90

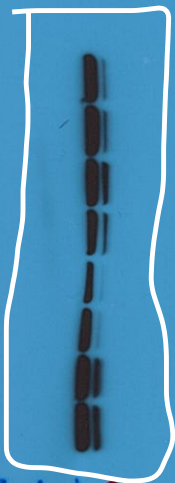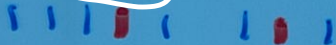

Supplement: fig4-figsupp1-data2 [file Xerox Scan_08052025135450 with marks.pdf › Figure 4 - figure supplement 1 - Source data 2/Xerox Scan_08052025135450 with marks.pdf]

Figure 5E

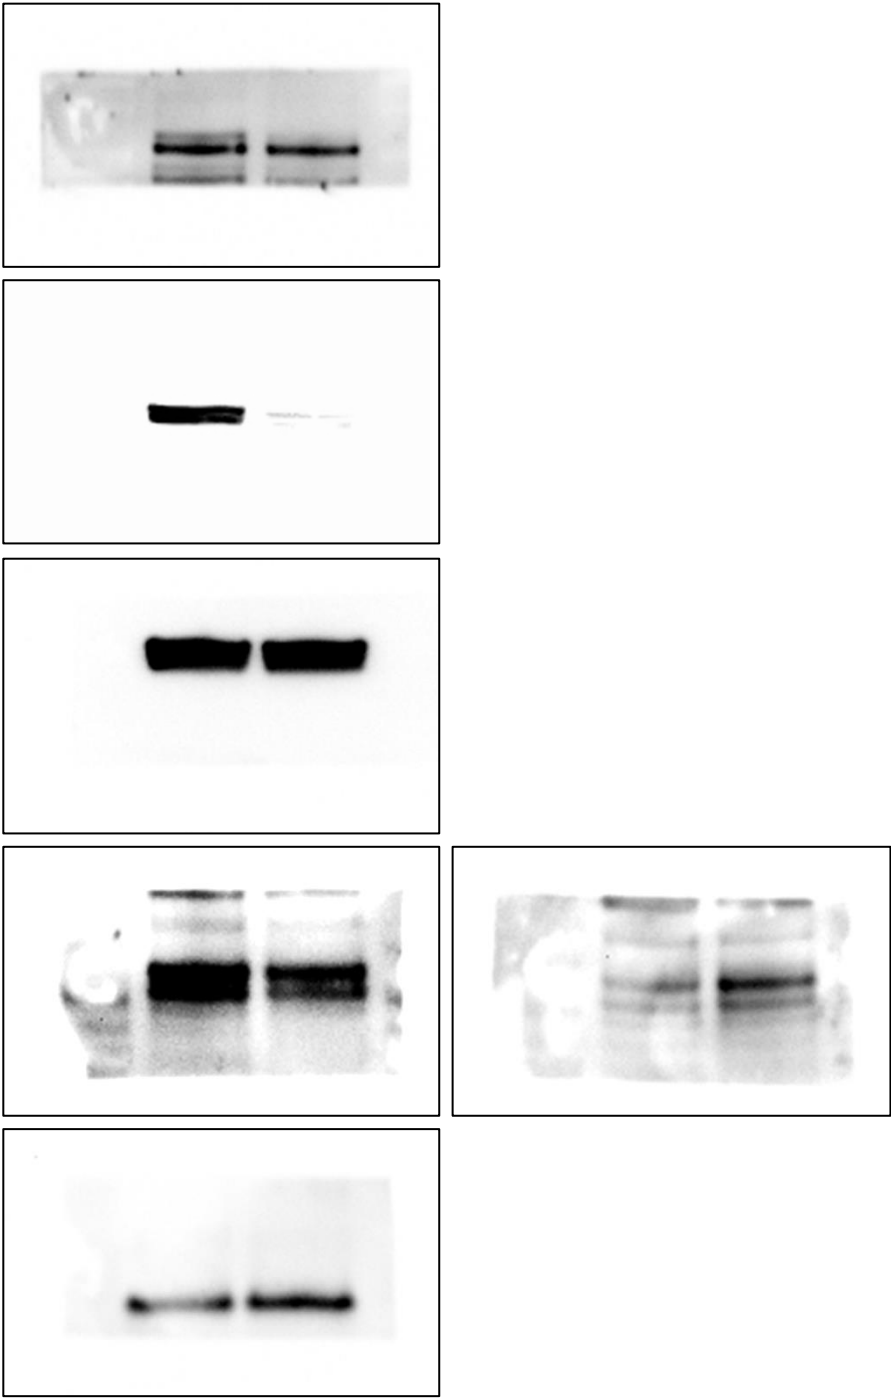

Supplement: fig5-data1 [file Figure5E raw blots without labeling.pdf › Figure 5 - source data 1/Figure5E raw blots without labeling.pdf]

Figure 5E

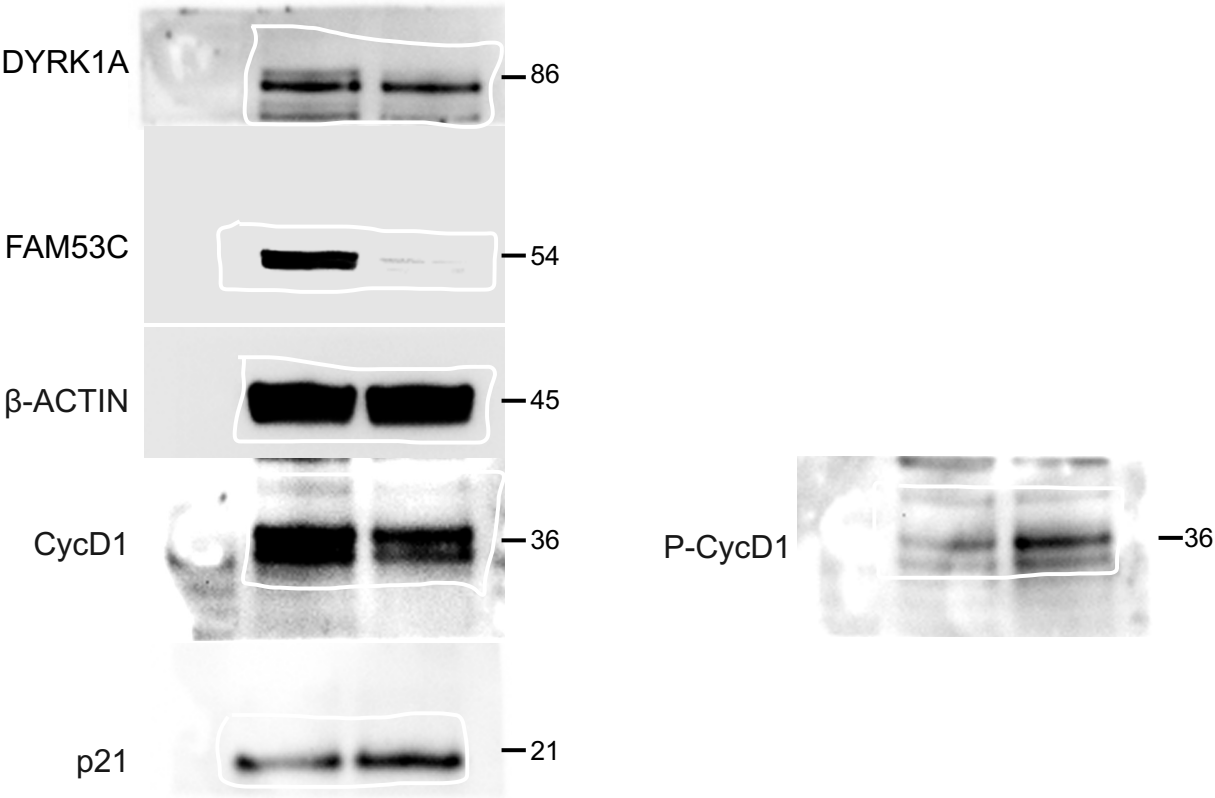

Supplement: fig5-data2 [file Figure5E raw blots with marks.pdf › Figure 5 - source data 2/Figure5E raw blots with marks.pdf]
